# Supplementary material for: Pronounced expression of extracellular matrix proteoglycans regulated by Wnt pathway underlies the parallel evolution of lip hypertrophy in East African cichlids
Source: eLife. 2025 Apr 22;13:RP99160. doi: 10.7554/eLife.99160 (PMC12014132; doi:10.7554/eLife.99160)
Supplement: Supplementary file 1. — (a) Basic information of the cichlids used in this study. (b) List of extracellular matrix (ECM)-related genes of cichlids identified in this study. The classification of ECM-related genes (the column of matrisome_annotation) follows a previous study (Hynes and Naba, 2012). (c) All differentially accumulated proteins detected by LC–MS/MS under the criteria of p-value <0.05, log2 fold change >1. (d) Results of enrichment analysis of highly expressed genes in hypertrophied lips of juvenile and adult cichlids. The annotation terms were clustered by DAVID annotation clustering. (f) All differentially expressed genes between hypertrophied and normal lips. We compared adult Victoria cichlids (H. chilotes with hypertrophied lips and H. sauvagei with normal lips), juvenile Victoria cichlids (H. chilotes and H. sauvagei), Malawi cichlids (Placidochromis milomo with hypertrophied lips and Labidochromis caeruleus with normal lips), and Taganyika cichlids (Lobochilotes labiatus with hypertrophied lips and Tropheus moorii with normal lips). [file elife-99160-supp1.xlsx]

## Sheet: Supplementary File 1a
species	lip phenotype	lake	purpose	standard length (mm)	stage	sex	Sample id
Haplochromis chilotes	Hypertrophied	Victoria	RNA extraction	missing	adult	male	SAMD00024158
Haplochromis chilotes	Hypertrophied	Victoria	RNA extraction	missing	adult	male	SAMD00024159
Haplochromis chilotes	Hypertrophied	Victoria	RNA extraction	missing	adult	female	SAMD00024160
Haplochromis chilotes	Hypertrophied	Victoria	RNA extraction	missing	adult	female	SAMD00024161
Haplochromis chilotes	Hypertrophied	Victoria	RNA extraction	47	juvenile	female	SAMD00762465
Haplochromis chilotes	Hypertrophied	Victoria	RNA extraction	49	juvenile	male	SAMD00762466
Haplochromis chilotes	Hypertrophied	Victoria	RNA extraction	51	juvenile	male	SAMD00762467
Haplochromis chilotes	Hypertrophied	Victoria	Protein extraction	102	adult	male	JPST003042
Haplochromis chilotes	Hypertrophied	Victoria	Protein extraction	109	adult	male	JPST003042
Haplochromis chilotes	Hypertrophied	Victoria	Protein extraction	103	adult	female	JPST003042
Haplochromis chilotes	Hypertrophied	Victoria	Histology	97	adult	female
Haplochromis chilotes	Hypertrophied	Victoria	Histology	102	adult	male
Haplochromis chilotes	Hypertrophied	Victoria	Histology	88	adult	female
Haplochromis chilotes	Hypertrophied	Victoria	Histology	88	adult	female
Haplochromis chilotes	Hypertrophied	Victoria	Histology	99	adult	male
Haplochromis chilotes	Hypertrophied	Victoria	Histology	94	adult	female
Haplochromis chilotes	Hypertrophied	Victoria	Histology	94	adult	male
Haplochromis sauvagei	Normal	Victoria	RNA extraction	missing	adult	male	SAMD00024162
Haplochromis sauvagei	Normal	Victoria	RNA extraction	missing	adult	male	SAMD00024163
Haplochromis sauvagei	Normal	Victoria	RNA extraction	missing	adult	female	SAMD00024164
Haplochromis sauvagei	Normal	Victoria	RNA extraction	missing	adult	female	SAMD00024165
Haplochromis sauvagei	Normal	Victoria	RNA extraction	53	juvenile	male	SAMD00762468
Haplochromis sauvagei	Normal	Victoria	RNA extraction	46	juvenile	male	SAMD00762469
Haplochromis sauvagei	Normal	Victoria	RNA extraction	43	juvenile	male	SAMD00762470
Haplochromis sauvagei	Normal	Victoria	Protein extraction	87	adult	male	JPST003042
Haplochromis sauvagei	Normal	Victoria	Protein extraction	79	adult	male	JPST003042
Haplochromis sauvagei	Normal	Victoria	Protein extraction	89	adult	male	JPST003042
Haplochromis sauvagei	Normal	Victoria	Histology	93	adult	male
Haplochromis sauvagei	Normal	Victoria	Histology	80	adult	male
Haplochromis sauvagei	Normal	Victoria	Histology	79	adult	male
Haplochromis sauvagei	Normal	Victoria	Histology	80	adult	male
Haplochromis sauvagei	Normal	Victoria	Histology	71	adult	male
Haplochromis sauvagei	Normal	Victoria	Histology	76.5	adult	male
Haplochromis sauvagei	Normal	Victoria	Histology	71	adult	male
Haplochromis pyrrhocephalus	Normal	Victoria	RNA extraction	60	adult	male	SAMD00762471
Haplochromis pyrrhocephalus	Normal	Victoria	RNA extraction	57	adult	male	SAMD00762472
Placidochromis milomo	Hypertrophied	Malawi	RNA extraction	105	adult	male	SAMD00762473
Placidochromis milomo	Hypertrophied	Malawi	RNA extraction	89	adult	female?	SAMD00762474
Placidochromis milomo	Hypertrophied	Malawi	RNA extraction	98	adult	male	SAMD00762475
Placidochromis milomo	Hypertrophied	Malawi	RNA extraction	109	adult	male	SAMD00762476
Placidochromis milomo	Hypertrophied	Malawi	RNA extraction	112	adult	male	SAMD00762477
Placidochromis milomo	Hypertrophied	Malawi	Histology	174	adult	male
Maylandia lombardoi	Normal	Malawi	Histology	94	adult	male
Maylandia zebra	Normal	Malawi	RNA extraction	72	adult	male	SAMD00762478
Maylandia zebra	Normal	Malawi	RNA extraction	81	adult	male	SAMD00762479
Labidochromis caeruleus	Normal	Malawi	RNA extraction	115	adult	male	SAMD00762480
Labidochromis caeruleus	Normal	Malawi	RNA extraction	82	adult	female	SAMD00762481
Labidochromis caeruleus	Normal	Malawi	RNA extraction	90	adult	male	SAMD00762482
Labidochromis caeruleus	Normal	Malawi	RNA extraction	105	adult	missing	SAMD00762483
Labidochromis caeruleus	Normal	Malawi	RNA extraction	97	adult	missing	SAMD00762484
Lobochilotes labiatus	Hypertrophied	Tanganyika	RNA extraction	97	adult	missing	SAMD00762485
Lobochilotes labiatus	Hypertrophied	Tanganyika	RNA extraction	102	adult	missing	SAMD00762486
Lobochilotes labiatus	Hypertrophied	Tanganyika	RNA extraction	91	adult	missing	SAMD00762487
Lobochilotes labiatus	Hypertrophied	Tanganyika	RNA extraction	155	adult	missing	SAMD00762488
Lobochilotes labiatus	Hypertrophied	Tanganyika	Histology	105	adult	male
Tropheus moorii	Normal	Tanganyika	RNA extraction	71	adult	male	SAMD00762489
Tropheus moorii	Normal	Tanganyika	RNA extraction	73	adult	male	SAMD00762490
Tropheus moorii	Normal	Tanganyika	RNA extraction	103	adult	missing	SAMD00762491
Tropheus moorii	Normal	Tanganyika	RNA extraction	106	adult	male	SAMD00762492
Tropheus moorii	Normal	Tanganyika	Histology	66	adult	missing

## Sheet: Supplementary File 1b
matrisome_annotation	Gene_symbol	Gene_fastaID	Mzebra_gene_fastaID(Manual)	Oniloticus_gene_fastaID(Manual)
Collagen	col10a1a	ENSDARP00000085454|ENSDART00000091021|ENSDARG00000054753|col10a1a	ENSMZEG00005001936	ENSONIG00000001340
Collagen	col10a1b	ENSDARP00000130066|ENSDART00000162218|ENSDARG00000101535|col10a1b	ENSMZEG00005015905	ENSONIG00000011344
Collagen	col11a1a	ENSDARP00000002692|ENSDART00000003503|ENSDARG00000026165|col11a1a	ENSMZEG00005020251	ENSONIG00000004773
Collagen	col11a1b	ENSDARP00000049588|ENSDART00000049589|ENSDARG00000009014|col11a1b	ENSMZEG00005024351	ENSONIG00000018523
Collagen	col12a1a	ENSDARP00000128902|ENSDART00000154728|ENSDARG00000078322|col12a1a	ENSMZEG00005005558	ENSONIG00000008087
Collagen	col12a1b	ENSDARP00000009356|ENSDART00000025926|ENSDARG00000019601|col12a1b	ENSMZEG00005022304	ENSONIG00000018733
Collagen	col14a1a	ENSDARP00000017432|ENSDART00000027982|ENSDARG00000005762|col14a1a	ENSMZEG00005025495	ENSONIG00000006815
Collagen	col14a1b	tr|A0A0R4IP59|A0A0R4IP59_DANRE Collagen, type XIV, alpha 1b (Fragment) OS=Danio rerio OX=7955 GN=col14a1b PE=4 SV=1	ENSMZEG00005027050	ENSONIG00000007189
Collagen	col15a1a	tr|B5DE26|B5DE26_DANRE Col15a1 protein OS=Danio rerio OX=7955 GN=col15a1a PE=2 SV=1	ENSMZEG00005025327	ENSONIG00000006537
Collagen	col15a1b	ENSDARP00000083076|ENSDART00000088643|ENSDARG00000061848|col15a1b	ENSMZEG00005015125	ENSONIG00000028856
Collagen	col16a1	ENSDARP00000116089|ENSDART00000136775|ENSDARG00000009194|col16a1		ENSONIG00000042754
Collagen	col17a1a	ENSDARP00000122777|ENSDART00000142957|ENSDARG00000069415|col17a1a		ENSONIG00000029619
Collagen	col17a1b	ENSDARP00000022516|ENSDART00000021053|ENSDARG00000079011|col17a1b	ENSMZEG00005027556	ENSONIG00000000397
Collagen	col18a1	ENSDARP00000002450|ENSDART00000007058|ENSDARG00000036558|col18a1a		ENSONIG00000004587
Collagen	col19a1	ENSDARP00000098972|ENSDART00000110976|ENSDARG00000096073|col19a1	ENSMZEG00005005666	ENSONIG00000009773
Collagen	col1a1a	ENSDARP00000003177|ENSDART00000009393|ENSDARG00000012405|col1a1a	ENSMZEG00005018722	ENSONIG00000006366
Collagen	col1a1b	ENSDARP00000003038|ENSDART00000015092|ENSDARG00000035809|col1a1b	ENSMZEG00005005660	ENSONIG00000007944
Collagen	col1a2	ENSDARP00000118091|ENSDART00000144544|ENSDARG00000020007|col1a2	ENSMZEG00005008145	ENSONIG00000010792
Collagen	Col20a1	ENSMUSP00000104484.3|ENSMUST00000108856.9|ENSMUSG00000016356.19|OTTMUSG00000019845.4|OTTMUST00000168656.1|Col20a1-201|Col20a1|1362	ENSMZEG00005022095	ENSONIG00000001615
Collagen	col21a1_1	ENSDARP00000033176|ENSDART00000029343|ENSDARG00000025320|col21a1	ENSMZEG00005015514	ENSONIG00000011264
Collagen	col21a1_2	ENSDARP00000033176|ENSDART00000029343|ENSDARG00000025320|col21a1	ENSMZEG00005004930	ENSONIG00000009732
Collagen	col22a1	tr|M5BFV8|M5BFV8_DANRE Collagen type XXII alpha 1 chain OS=Danio rerio OX=7955 GN=col22a1 PE=2 SV=1	ENSMZEG00005016871	ENSONIG00000007632
Collagen	col23a1	ENSDARP00000118872|ENSDART00000133031|ENSDARG00000095339|si:dkeyp-44a8.4	ENSMZEG00005012592	ENSONIG00000036485
Collagen	col27a1a	sp|C7DZK3|CRA1A_DANRE Collagen alpha-1(XXVII) chain A OS=Danio rerio OX=7955 GN=col27a1a PE=2 SV=1	ENSMZEG00005002418	ENSONIG00000007416
Collagen	col28a1b	ENSDARP00000130072|ENSDART00000170103|ENSDARG00000087087|col28a1b	ENSMZEG00005015610	ENSONIG00000006506
Collagen	col28a2a	ENSDARP00000100078|ENSDART00000115121|ENSDARG00000076321|col28a2a	ENSMZEG00005005913	ENSONIG00000008795
Collagen	col28a2b	tr|C0H5V8|C0H5V8_DANRE Collagen type XXVIII alpha 2 b (Fragment) OS=Danio rerio OX=7955 GN=col28a2b PE=2 SV=1	ENSMZEG00005018004	ENSONIG00000011865
Collagen	col2a1a	ENSDARP00000085740|ENSDART00000091307|ENSDARG00000069093|col2a1a	ENSMZEG00005026136	ENSONIG00000017019
Collagen	col2a1b	ENSDARP00000139349|ENSDART00000159169|ENSDARG00000011407|col2a1b	ENSMZEG00005006568	ENSONIG00000005146
Collagen	col4a1	ENSDARP00000071763|ENSDART00000077296|ENSDARG00000055009|col4a1	ENSMZEG00005000072	ENSONIG00000014346
Collagen	col4a2	ENSDARP00000135982|ENSDART00000159077|ENSDARG00000104110|col4a2	ENSMZEG00005022396	ENSONIG00000014329
Collagen	col4a3	ENSDARP00000049848|ENSDART00000049849|ENSDARG00000003395|col4a3	ENSMZEG00005000220
Collagen	col4a4	ENSDARP00000129072|ENSDART00000154476|ENSDARG00000002831|col4a4	ENSMZEG00005025522
Collagen	col4a5	ENSDARP00000068317|ENSDART00000073827|ENSDARG00000052063|col4a5	ENSMZEG00005024905	ENSONIG00000004997
Collagen	col4a6	ENSDARP00000105937|ENSDART00000121574|ENSDARG00000052061|col4a6	ENSMZEG00005024227
Collagen	col5a1	ENSDARP00000120854|ENSDART00000139598|ENSDARG00000012593|col5a1	ENSMZEG00005004152	ENSONIG00000011209
Collagen	col5a2a	ENSDARP00000122378|ENSDART00000144744|ENSDARG00000031678|col5a2a	ENSMZEG00005014706	ENSONIG00000004630
Collagen	col5a2b	ENSDARP00000031878|ENSDART00000029314|ENSDARG00000024847|col5a2b	ENSMZEG00005015382	ENSONIG00000007142
Collagen	col5a3a	ENSDARP00000141009|ENSDART00000170461|ENSDARG00000098294|col5a3a	ENSMZEG00005018720	ENSONIG00000001614
Collagen	col5a3b	ENSDARP00000136818|ENSDART00000158011|ENSDARG00000101816|col5a3b	ENSMZEG00005013366
Collagen	col6a1	ENSDARP00000103794|ENSDART00000110608|ENSDARG00000074908|col6a1	ENSMZEG00005011386	ENSONIG00000015644
Collagen	col6a2	ENSDARP00000082031|ENSDART00000087597|ENSDARG00000061436|col6a2	ENSMZEG00005011331	ENSONIG00000015650
Collagen	col6a3_1	ENSDARP00000122802|ENSDART00000140346|ENSDARG00000095915|col6a3	ENSMZEG00005013619	ENSONIG00000007828
Collagen	col6a3_2	ENSDARP00000122802|ENSDART00000140346|ENSDARG00000095915|col6a3	ENSMZEG00005013637	ENSONIG00000041011
Collagen	col6a3_3	ENSDARP00000122802|ENSDART00000140346|ENSDARG00000095915|col6a3	ENSMZEG00005021527
Collagen	col6a3_4	ENSDARP00000122802|ENSDART00000140346|ENSDARG00000095915|col6a3	ENSMZEG00005028493
Collagen	col6a3_5	ENSDARP00000122802|ENSDART00000140346|ENSDARG00000095915|col6a3	ENSMZEG00005028488
Collagen	col6a3_6	ENSDARP00000122802|ENSDART00000140346|ENSDARG00000095915|col6a3	ENSMZEG00005028494
Collagen	Col6a4_Mze1	ENSDARP00000103549|ENSDART00000109703|ENSDARG00000079752|col6a4a	ENSMZEG00005016769	ENSONIG00000002034
Collagen	Col6a4_Mze2	ENSDARP00000103549|ENSDART00000109703|ENSDARG00000079752|col6a4a	ENSMZEG00005017367
Collagen	col7a1l	ENSDARP00000092365|ENSDART00000101592|ENSDARG00000069692|col7a1l	ENSMZEG00005009670
Collagen	col8a1a	ENSDARP00000093755|ENSDART00000102981|ENSDARG00000077403|col8a1a	ENSMZEG00005021864	ENSONIG00000006689
Collagen	col8a1b	ENSDARP00000006367|ENSDART00000019846|ENSDARG00000003533|col8a1b	ENSMZEG00005017948	ENSONIG00000012472
Collagen	col8a2	ENSDARP00000114013|ENSDART00000136811|ENSDARG00000060893|col8a2	ENSMZEG00005010509	ENSONIG00000038111
Collagen	col9a1a	ENSDARP00000097619|ENSDART00000113311|ENSDARG00000073699|col9a1a	ENSMZEG00005025922	ENSONIG00000009778
Collagen	col9a2	ENSDARP00000037624|ENSDART00000035093|ENSDARG00000024492|col9a2	ENSMZEG00005010617	ENSONIG00000004658
Collagen	col9a3	ENSDARP00000055138|ENSDART00000055139|ENSDARG00000037845|col9a3	ENSMZEG00005026013	ENSONIG00000017095
Glycoprotein	abi3bpa	ENSDARP00000083976|ENSDART00000089543|ENSDARG00000062156|abi3bpa	ENSMZEG00005021845	ENSONIG00000006694
Glycoprotein	abi3bpb	ENSDARP00000083979|ENSDART00000089546|ENSDARG00000071095|abi3bpb	ENSMZEG00005013274	ENSONIG00000009393
Glycoprotein	aebp1_1	ENSDARP00000108341|ENSDART00000126440|ENSDARG00000091726|aebp1	ENSMZEG00005001518	ENSONIG00000016028
Glycoprotein	aebp1_2	ENSDARP00000108341|ENSDART00000126440|ENSDARG00000091726|aebp1	ENSMZEG00005010238	ENSONIG00000010802
Glycoprotein	aebp1_3	ENSDARP00000108341|ENSDART00000126440|ENSDARG00000091726|aebp1	ENSMZEG00005009780	ENSONIG00000011513
Glycoprotein	agrn	ENSDARP00000101095|ENSDART00000114067|ENSDARG00000079388|agrn	ENSMZEG00005003936	ENSONIG00000009289
Glycoprotein	anos1a	ENSDARP00000008034|ENSDART00000007522|ENSDARG00000012896|anos1a	ENSMZEG00005019232	ENSONIG00000003710
Glycoprotein	anos1b	ENSDARP00000022793|ENSDART00000003736|ENSDARG00000004932|anos1b	ENSMZEG00005018474	ENSONIG00000009992
Glycoprotein	bglap	ENSDARP00000091618|ENSDART00000100845|ENSDARG00000058414|bglap	ENSMZEG00005005030	ENSONIG00000040259
Glycoprotein	bglapl	ENSDARP00000140656|ENSDART00000171799|ENSDARG00000104467|bglapl	ENSMZEG00005023834	ENSONIG00000030677
Glycoprotein	bmper	ENSDARP00000133233|ENSDART00000163281|ENSDARG00000101980|bmper	ENSMZEG00005009743	ENSONIG00000006713
Glycoprotein	cdcp2_Mze_1	ENSDARP00000103982|ENSDART00000114609|ENSDARG00000075866|cdcp2	ENSMZEG00005024375	ENSONIG00000037432
Glycoprotein	cdcp2_Mze_2	ENSDARP00000103982|ENSDART00000114609|ENSDARG00000075866|cdcp2	ENSMZEG00005024374
Glycoprotein	cilp	ENSDARP00000069881|ENSDART00000075398|ENSDARG00000053362|cilp	ENSMZEG00005001654	ENSONIG00000006251
Glycoprotein	cilp2	ENSDARP00000061429|ENSDART00000061430|ENSDARG00000013687|cilp2	ENSMZEG00005010305	ENSONIG00000002448
Glycoprotein	coch	ENSDARP00000001291|ENSDART00000000948|ENSDARG00000024032|coch	ENSMZEG00005004465	ENSONIG00000001879
Glycoprotein	colq_1	ENSDARP00000019894|ENSDART00000006037|ENSDARG00000019692|colq	ENSMZEG00005009648	ENSONIG00000004581
Glycoprotein	colq_2	ENSDARP00000019894|ENSDART00000006037|ENSDARG00000019692|colq	ENSMZEG00005013922	ENSONIG00000002914
Glycoprotein	comp	ENSDARP00000130361|ENSDART00000171255|ENSDARG00000098431|comp	ENSMZEG00005016957	ENSONIG00000012645
Glycoprotein	creld1a	ENSDARP00000139958|ENSDART00000161423|ENSDARG00000099989|creld1a	ENSMZEG00005012451	ENSONIG00000034639
Glycoprotein	creld1b	ENSDARP00000139958|ENSDART00000161423|ENSDARG00000099989|creld1a	ENSMZEG00005025820	ENSONIG00000017206
Glycoprotein	creld2	ENSDARP00000048382|ENSDART00000048383|ENSDARG00000029071|creld2	ENSMZEG00005015450	ENSONIG00000009787
Glycoprotein	crim1	ENSDARP00000050533|ENSDART00000050534|ENSDARG00000029668|crim1	ENSMZEG00005027004	ENSONIG00000012133
Glycoprotein	crispld1a	ENSDARP00000102943|ENSDART00000113859|ENSDARG00000077275|crispld1a	ENSMZEG00005021437	ENSONIG00000014315
Glycoprotein	crispld1b	ENSDARP00000110358|ENSDART00000129542|ENSDARG00000013293|crispld1b	ENSMZEG00005015237	ENSONIG00000016699
Glycoprotein	crispld2	ENSDARP00000110563|ENSDART00000130227|ENSDARG00000088595|crispld2	ENSMZEG00005014153	ENSONIG00000005903
Glycoprotein	ctgfa	ENSDARP00000063027|ENSDART00000063028|ENSDARG00000042934|ccn2a	ENSMZEG00005012976	ENSONIG00000000729
Glycoprotein	cthrc1a	ENSDARP00000115065|ENSDART00000132892|ENSDARG00000087198|cthrc1a	ENSMZEG00005012225	ENSONIG00000000137
Glycoprotein	cyr61	ENSDARP00000036965|ENSDART00000036631|ENSDARG00000023062|ccn1	ENSMZEG00005006957	ENSONIG00000008866
Glycoprotein	cyr61l1	ENSDARP00000051335|ENSDART00000051336|ENSDARG00000035422|ccn1l1	ENSMZEG00005018490	ENSONIG00000038451
Glycoprotein	ddx26b_1	ENSDARP00000026435|ENSDART00000002684|ENSDARG00000017931|ints6l	ENSMZEG00005018699	ENSONIG00000017067
Glycoprotein	ddx26b_2	ENSDARP00000026435|ENSDART00000002684|ENSDARG00000017931|ints6l	ENSMZEG00005006291	ENSONIG00000017592
Glycoprotein	DMBT1(Human)_1	ENSP00000327747.4|ENST00000330163.8|ENSG00000187908.20|OTTHUMG00000019185.21|OTTHUMT00000050801.1|DMBT1-201|DMBT1|1785	ENSMZEG00005007755	ENSONIG00000017739
Glycoprotein	DMBT1(Human)_2	ENSP00000327747.4|ENST00000330163.8|ENSG00000187908.20|OTTHUMG00000019185.21|OTTHUMT00000050801.1|DMBT1-201|DMBT1|1785	ENSMZEG00005026718	ENSONIG00000027297
Glycoprotein	dpt	ENSDARP00000073086|ENSDART00000078625|ENSDARG00000056178|dpt	ENSMZEG00005008462	ENSONIG00000019333
Glycoprotein	ecm1a	ENSDARP00000137189|ENSDART00000165630|ENSDARG00000100535|ecm1a	ENSMZEG00005026595
Glycoprotein	ecm1b	ENSDARP00000134609|ENSDART00000164103|ENSDARG00000105239|ecm1b	ENSMZEG00005022430	ENSONIG00000006225
Glycoprotein	ecm2	ENSDARP00000116963|ENSDART00000136961|ENSDARG00000071549|ecm2	ENSMZEG00005017079	ENSONIG00000000475
Glycoprotein	edil3a	ENSDARP00000120470|ENSDART00000133240|ENSDARG00000093413|edil3a	ENSMZEG00005014589	ENSONIG00000015924
Glycoprotein	efemp1	ENSDARP00000076579|ENSDART00000082142|ENSDARG00000059121|EFEMP1	ENSMZEG00005027647	ENSONIG00000018466
Glycoprotein	efemp2a	ENSDARP00000120392|ENSDART00000134098|ENSDARG00000094324|efemp2a	ENSMZEG00005005472	ENSONIG00000005469
Glycoprotein	Egfem1(Mouse)	ENSMUSP00000112907.2|ENSMUST00000118531.8|ENSMUSG00000063600.15|OTTMUSG00000030000.6|OTTMUST00000074400.1|Egfem1-201|Egfem1|533	ENSMZEG00005005166	ENSONIG00000005590
Glycoprotein	egflam	ENSDARP00000132488|ENSDART00000160362|ENSDARG00000099008|EGFLAM	ENSMZEG00005027473	ENSONIG00000014949
Glycoprotein	emid1	ENSDARP00000122495|ENSDART00000146872|ENSDARG00000076119|emid1	ENSMZEG00005017404	ENSONIG00000013382
Glycoprotein	emilin1a	ENSDARP00000033466|ENSDART00000035612|ENSDARG00000024537|emilin1a	ENSMZEG00005002680	ENSONIG00000001290
Glycoprotein	emilin1b	ENSDARP00000095986|ENSDART00000105215|ENSDARG00000026166|emilin1b	ENSMZEG00005005061	ENSONIG00000003220
Glycoprotein	emilin2a	ENSDARP00000081460|ENSDART00000087026|ENSDARG00000061196|emilin2a	ENSMZEG00005020096	ENSONIG00000009207
Glycoprotein	emilin2b	ENSDARP00000137101|ENSDART00000163002|ENSDARG00000102178|emilin2b	ENSMZEG00005001644	ENSONIG00000006101
Glycoprotein	emilin3a	ENSDARP00000098184|ENSDART00000112381|ENSDARG00000078052|emilin3a	ENSMZEG00005026386	ENSONIG00000016807
Glycoprotein	emilin3b	ENSDARP00000103682|ENSDART00000109807|ENSDARG00000076299|FQ323119.1	ENSMZEG00005026544	ENSONIG00000017412
Glycoprotein	eys	ENSDARP00000106120|ENSDART00000124241.1|ENSDARG00000089257|	ENSMZEG00005005548	ENSONIG00000009762
Glycoprotein	fbln1	ENSDARP00000135089|ENSDART00000159555|ENSDARG00000103311|fbln1	ENSMZEG00005010285	ENSONIG00000008842
Glycoprotein	fbln2_1	ENSDARP00000100955|ENSDART00000113707|ENSDARG00000015156|fbln2	ENSMZEG00005025888	ENSONIG00000017187
Glycoprotein	fbln2_2	ENSDARP00000100955|ENSDART00000113707|ENSDARG00000015156|fbln2	ENSMZEG00005006740	ENSONIG00000037139
Glycoprotein	fbln5	ENSDARP00000057381|ENSDART00000057382|ENSDARG00000039273|fbln5	ENSMZEG00005011035	ENSONIG00000019612
Glycoprotein	fbln7	ENSDARP00000105559|ENSDART00000121817|ENSDARG00000089519|fbln7	ENSMZEG00005006855	ENSONIG00000009881
Glycoprotein	fbn1	tr|A0A140LGB0|Release 2018_05/2018_05|23-May-2018	ENSMZEG00005007376	ENSONIG00000013348
Glycoprotein	fbn2a	ENSDARP00000068094|ENSDART00000073604|ENSDARG00000051896|fbn2a	ENSMZEG00005002351
Glycoprotein	fga	ENSDARP00000029074|ENSDART00000033118|ENSDARG00000020741|fga	ENSMZEG00005027843	ENSONIG00000014102
Glycoprotein	fgb	ENSDARP00000016228|ENSDART00000011701|ENSDARG00000008969|fgb	ENSMZEG00005027840	ENSONIG00000014105
Glycoprotein	fgg	ENSDARP00000054229|ENSDART00000054230|ENSDARG00000037281|fgg	ENSMZEG00005007050	ENSONIG00000010186
Glycoprotein	fgl1	ENSDARP00000142264|ENSDART00000172794|ENSDARG00000105380|fgl1	ENSMZEG00005005063	ENSONIG00000015872
Glycoprotein	fgl2a	ENSDARP00000023829|ENSDART00000022539|ENSDARG00000019861|fgl2a	ENSMZEG00005010800	ENSONIG00000033531
Glycoprotein	fn1a	ENSDARP00000112231|ENSDART00000124346|ENSDARG00000019815|fn1a	ENSMZEG00005001851	ENSONIG00000004372
Glycoprotein	fn1b	ENSDARP00000141528|ENSDART00000103754|ENSDARG00000006526|fn1b	ENSMZEG00005005743	ENSONIG00000003336
Glycoprotein	fndc1	ENSDARP00000013881|ENSDART00000014163|ENSDARG00000002847|fndc1	ENSMZEG00005018113	ENSONIG00000013266
Glycoprotein	fndc7a	ENSDARP00000104102|ENSDART00000113994|ENSDARG00000077096|fndc7a	ENSMZEG00005025531	ENSONIG00000010126
Glycoprotein	fndc7b_Mze_1	ENSDARP00000122673|ENSDART00000136037|ENSDARG00000075676|fndc7b	ENSMZEG00005018874	ENSONIG00000043125
Glycoprotein	fndc7b_Mze_2	ENSDARP00000122673|ENSDART00000136037|ENSDARG00000075676|fndc7b	ENSMZEG00005025534
Glycoprotein	fras1	ENSDARP00000071316|ENSDART00000076845|ENSDARG00000054619|fras1	ENSMZEG00005020260
Glycoprotein	gas6	ENSDARP00000018668|ENSDART00000010092|ENSDARG00000007804|gas6	ENSMZEG00005002762	ENSONIG00000003162
Glycoprotein	gldn_1	ENSDARP00000082393|ENSDART00000087960|ENSDARG00000061576|gldn	ENSMZEG00005007223	ENSONIG00000000153
Glycoprotein	gldn_2	ENSDARP00000082393|ENSDART00000087960|ENSDARG00000061576|gldn	ENSMZEG00005002408	ENSONIG00000032749
Glycoprotein	hmcn1	ENSDARP00000005919|ENSDART00000020389|ENSDARG00000016936|hmcn1	ENSMZEG00005018519	ENSONIG00000009997
Glycoprotein	hmcn2	ENSDARP00000109565|ENSDART00000126833|ENSDARG00000086060|hmcn2	ENSMZEG00005008963
Glycoprotein	igfals	ENSDARP00000055131|ENSDART00000055132|ENSDARG00000037836|igfals	ENSMZEG00005022465	ENSONIG00000020936
Glycoprotein	igfbp1a	ENSDARP00000135671|ENSDART00000170934|ENSDARG00000099351|igfbp1a	ENSMZEG00005017173	ENSONIG00000006369
Glycoprotein	igfbp1b	ENSDARP00000056452|ENSDART00000056453|ENSDARG00000038666|igfbp1b	ENSMZEG00005025156	ENSONIG00000009667
Glycoprotein	igfbp2a	ENSDARP00000068816|ENSDART00000074327|ENSDARG00000052470|igfbp2a	ENSMZEG00005014471	ENSONIG00000013363
Glycoprotein	igfbp3_1	ENSDARP00000136501|ENSDART00000167344|ENSDARG00000099144|igfbp3	ENSMZEG00005017178	ENSONIG00000006363
Glycoprotein	igfbp3_2	ENSDARP00000136501|ENSDART00000167344|ENSDARG00000099144|igfbp3	ENSMZEG00005025157	ENSONIG00000009669
Glycoprotein	IGFBP4(Human)	ENSP00000269593.4|ENST00000269593.5|ENSG00000141753.7|OTTHUMG00000133326.2|OTTHUMT00000257134.2|IGFBP4-201|IGFBP4|258	ENSMZEG00005012532	ENSONIG00000009007
Glycoprotein	igfbp5a	ENSDARP00000057368|ENSDART00000057369|ENSDARG00000039264|igfbp5a	ENSMZEG00005014490	ENSONIG00000013364
Glycoprotein	igfbp5b	ENSDARP00000054136|ENSDART00000054137|ENSDARG00000025348|igfbp5b	ENSMZEG00005014633	ENSONIG00000004668
Glycoprotein	igfbp6a	ENSDARP00000095343|ENSDART00000104571|ENSDARG00000070941|igfbp6a	ENSMZEG00005001447	ENSONIG00000019172
Glycoprotein	igfbp6b	ENSDARP00000109154|ENSDART00000128598|ENSDARG00000090833|igfbp6b	ENSMZEG00005026673	ENSONIG00000016561
Glycoprotein	igfbp7	ENSDARP00000139497|ENSDART00000157833|ENSDARG00000104138|igfbp7	ENSMZEG00005022114	ENSONIG00000000074
Glycoprotein	igsf10	ENSDARP00000129272|ENSDART00000156202|ENSDARG00000077497|igsf10	ENSMZEG00005001174	ENSONIG00000003578
Glycoprotein	KAL1(Human)	sp|P23352|KALM_HUMAN Anosmin-1 OS=Homo sapiens OX=9606 GN=ANOS1 PE=1 SV=3	ENSMZEG00005002260	ENSONIG00000016014
Glycoprotein	KCP(Human)	ENSP00000477644.1|ENST00000613019.4|ENSG00000135253.16|OTTHUMG00000158363.7|OTTHUMT00000476757.1|KCP-206|KCP|1568	ENSMZEG00005019993	ENSONIG00000014997
Glycoprotein	lama1_Mze_1	tr|Q45H72|Q45H72_DANRE Laminin alpha 1 OS=Danio rerio OX=7955 GN=lama1 PE=2 SV=1	ENSMZEG00005015854	ENSONIG00000015109
Glycoprotein	lama1_Mze_2	tr|Q45H72|Q45H72_DANRE Laminin alpha 1 OS=Danio rerio OX=7955 GN=lama1 PE=2 SV=1	ENSMZEG00005028372
Glycoprotein	lama2	ENSDARP00000131993|ENSDART00000164896|ENSDARG00000099390|lama2	ENSMZEG00005002617	ENSONIG00000005802
Glycoprotein	lama3	ENSDARP00000117597|ENSDART00000135987|ENSDARG00000071462|lama3	ENSMZEG00005025400	ENSONIG00000002865
Glycoprotein	lama4	ENSDARP00000006065|ENSDART00000002661|ENSDARG00000020785|lama4	ENSMZEG00005015787	ENSONIG00000011356
Glycoprotein	lama5_Mze_1	ENSDARP00000045125|ENSDART00000045126|ENSDARG00000058543|lama5	ENSMZEG00005025402	ENSONIG00000009751
Glycoprotein	lama5_Mze_2	ENSDARP00000045125|ENSDART00000045126|ENSDARG00000058543|lama5	ENSMZEG00005026795
Glycoprotein	lamb1a_Mze_1	ENSDARP00000141956|ENSDART00000166930|ENSDARG00000101209|lamb1a	ENSMZEG00005020370	ENSONIG00000017383
Glycoprotein	lamb1a_Mze_2	ENSDARP00000141956|ENSDART00000166930|ENSDARG00000101209|lamb1a	ENSMZEG00005000188	ENSONIG00000017383
Glycoprotein	lamb1b	ENSDARP00000066944|ENSDART00000066945|ENSDARG00000045524|lamb1b	ENSMZEG00005000865	ENSONIG00000017855
Glycoprotein	lamb2	ENSDARP00000123269|ENSDART00000147326|ENSDARG00000002084|lamb2	ENSMZEG00005022129	ENSONIG00000001584
Glycoprotein	lamb2l	ENSDARP00000048365|ENSDART00000048366|ENSDARG00000033950|lamb2l	ENSMZEG00005022120	ENSONIG00000001597
Glycoprotein	Lamb3(Mouse)	ENSP00000348384.3|ENST00000356082.9|ENSG00000196878.15|OTTHUMG00000036360.5|OTTHUMT00000088525.3|LAMB3-201|LAMB3|1172	ENSMZEG00005005762	ENSONIG00000004636
Glycoprotein	lamb4	ENSDARP00000058399|ENSDART00000058400|ENSDARG00000039133|lamb4	ENSMZEG00005020359	ENSONIG00000017391
Glycoprotein	lamc1	ENSDARP00000024860|ENSDART00000004277|ENSDARG00000036279|lamc1	ENSMZEG00005014123	ENSONIG00000000305
Glycoprotein	lamc2	ENSDARP00000089477|ENSDART00000098706|ENSDARG00000068288|lamc2	ENSMZEG00005014190
Glycoprotein	lamc3	ENSDARP00000117247|ENSDART00000145127|ENSDARG00000093572|lamc3	ENSMZEG00005003730	ENSONIG00000011253
Glycoprotein	lgi1a	ENSDARP00000027521|ENSDART00000017854|ENSDARG00000020493|lgi1a	ENSMZEG00005027640	ENSONIG00000018472
Glycoprotein	lgi1b	ENSDARP00000075741|ENSDART00000081298|ENSDARG00000058421|lgi1b	ENSMZEG00005015210	ENSONIG00000036725
Glycoprotein	lgi2a	tr|Q2HPG1|Q2HPG1_DANRE LGI2A OS=Danio rerio OX=7955 GN=lgi2a PE=2 SV=1	ENSMZEG00005001904	ENSONIG00000040285
Glycoprotein	lgi2b	ENSDARP00000092397|ENSDART00000101623|ENSDARG00000069701|lgi2b	ENSMZEG00005022600	ENSONIG00000014508
Glycoprotein	lgi3	ENSDARP00000060624|ENSDART00000060625|ENSDARG00000041358|lgi3	ENSMZEG00005007675	ENSONIG00000011011
Glycoprotein	LRG1 (1 to many)	tr|A0A0G2L5W6|Release 2018_03/2018_03|28-Mar-2018	ENSMZEG00005018282	ENSONIG00000033186
Glycoprotein	ltbp1	ENSDARP00000073916|ENSDART00000079460|ENSDARG00000056922|ltbp1	ENSMZEG00005018615	ENSONIG00000011223
Glycoprotein	LTBP2(Human)	ENSP00000261978.4|ENST00000261978.9|ENSG00000119681.12|OTTHUMG00000171476.4|OTTHUMT00000413595.2|LTBP2-201|LTBP2|1821	ENSMZEG00005008862	ENSONIG00000012026
Glycoprotein	ltbp3	ENSDARP00000048106|ENSDART00000048107|ENSDARG00000035682|FP102018.1	ENSMZEG00005016727	ENSONIG00000005279
Glycoprotein	ltbp4	ENSDARP00000134892|ENSDART00000160702|ENSDARG00000099137|BX663503.3	ENSMZEG00005024719	ENSONIG00000001139
Glycoprotein	matn1	ENSDARP00000049044|ENSDART00000049045|ENSDARG00000030215|matn1	ENSMZEG00005005935	ENSONIG00000002278
Glycoprotein	MATN2(Human)_Mze_1	ENSP00000254898.6|ENST00000254898.7|ENSG00000132561.14|OTTHUMG00000164795.5|OTTHUMT00000504466.2|MATN2-201|MATN2|956	ENSMZEG00005025451	ENSONIG00000016442
Glycoprotein	MATN2(Human)_Mze_2	ENSP00000254898.6|ENST00000254898.7|ENSG00000132561.14|OTTHUMG00000164795.5|OTTHUMT00000504466.2|MATN2-201|MATN2|956	ENSMZEG00005028250
Glycoprotein	matn3a	ENSDARP00000091381|ENSDART00000100608|ENSDARG00000069245|matn3a	ENSMZEG00005024919	ENSONIG00000006110
Glycoprotein	matn4_Mze_1	ENSDARP00000021634|ENSDART00000002571|ENSDARG00000015947|matn4	ENSMZEG00005008052	ENSONIG00000005355
Glycoprotein	matn4_Mze_2	ENSDARP00000021634|ENSDART00000002571|ENSDARG00000015947|matn4	ENSMZEG00005021321
Glycoprotein	mfap1	ENSDARP00000017863|ENSDART00000028105|ENSDARG00000018241|mfap1	ENSMZEG00005015824	ENSONIG00000006983
Glycoprotein	mfap2	ENSDARP00000076906|ENSDART00000082471|ENSDARG00000059367|mfap2	ENSMZEG00005011626	ENSONIG00000018909
Glycoprotein	MFAP3(Human)	ENSP00000322956.5|ENST00000322602.9|ENSG00000037749.13|OTTHUMG00000130149.4|OTTHUMT00000252457.2|MFAP3-201|MFAP3|362	ENSMZEG00005020899	ENSONIG00000013007
Glycoprotein	mfap4_Mze_1	ENSDARP00000090972|ENSDART00000100199|ENSDARG00000090783|mfap4	ENSMZEG00005013304
Glycoprotein	mfap4_Mze_2	ENSDARP00000090972|ENSDART00000100199|ENSDARG00000090783|mfap4	ENSMZEG00005007219
Glycoprotein	mfap4_Mze_3	ENSDARP00000090972|ENSDART00000100199|ENSDARG00000090783|mfap4	ENSMZEG00005026645
Glycoprotein	mfap4_Mze_4	ENSDARP00000090972|ENSDART00000100199|ENSDARG00000090783|mfap4	ENSMZEG00005026643
Glycoprotein	mfap4_Mze_5	ENSDARP00000090972|ENSDART00000100199|ENSDARG00000090783|mfap4	ENSMZEG00005026809
Glycoprotein	mfap4_Mze_6	ENSDARP00000090972|ENSDART00000100199|ENSDARG00000090783|mfap4	ENSMZEG00005013231
Glycoprotein	mfap4_Mze_7	ENSDARP00000090972|ENSDART00000100199|ENSDARG00000090783|mfap4	ENSMZEG00005010150
Glycoprotein	mfap4_Mze_8	ENSDARP00000090972|ENSDART00000100199|ENSDARG00000090783|mfap4	ENSMZEG00005016025
Glycoprotein	mfap4_Oni_1	ENSDARP00000090972|ENSDART00000100199|ENSDARG00000090783|mfap4		ENSONIG00000000210
Glycoprotein	mfap4_Oni_2	ENSDARP00000090972|ENSDART00000100199|ENSDARG00000090783|mfap4		ENSONIG00000030050
Glycoprotein	mfap4_Oni_3	ENSDARP00000090972|ENSDART00000100199|ENSDARG00000090783|mfap4		ENSONIG00000019060
Glycoprotein	mfap4_Oni_4	ENSDARP00000090972|ENSDART00000100199|ENSDARG00000090783|mfap4		ENSONIG00000019069
Glycoprotein	mfap4_Oni_5	ENSDARP00000090972|ENSDART00000100199|ENSDARG00000090783|mfap4		ENSONIG00000028904
Glycoprotein	mfap4_Oni_6	ENSDARP00000090972|ENSDART00000100199|ENSDARG00000090783|mfap4		ENSONIG00000019115
Glycoprotein	mfap4_Oni_7	ENSDARP00000090972|ENSDART00000100199|ENSDARG00000090783|mfap4		ENSONIG00000019075
Glycoprotein	mfap4_Oni_8	ENSDARP00000090972|ENSDART00000100199|ENSDARG00000090783|mfap4		ENSONIG00000006632
Glycoprotein	mfap4_Oni_9	ENSDARP00000090972|ENSDART00000100199|ENSDARG00000090783|mfap4		ENSONIG00000019114
Glycoprotein	mfap5	ENSDARP00000123341|ENSDART00000147854|ENSDARG00000090560|mfap5	ENSMZEG00005016657	ENSONIG00000038495
Glycoprotein	mfge8a	ENSDARP00000022108|ENSDART00000015884|ENSDARG00000015349|mfge8a	ENSMZEG00005012239	ENSONIG00000013296
Glycoprotein	mfge8b	ENSDARP00000067323|ENSDART00000067324|ENSDARG00000045803|mfge8b	ENSMZEG00005011554	ENSONIG00000015629
Glycoprotein	mmrn2a	ENSDARP00000119074|ENSDART00000136808|ENSDARG00000076135|mmrn2a	ENSMZEG00005004369	ENSONIG00000038109
Glycoprotein	mxra5a	ENSDARP00000097966|ENSDART00000113486|ENSDARG00000074815|mxra5a	ENSMZEG00005021092	ENSONIG00000007340
Glycoprotein	mxra5b	ENSDARP00000114908|ENSDART00000144757|ENSDARG00000076309|mxra5b	ENSMZEG00005005409	ENSONIG00000004142
Glycoprotein	ndnf	ENSDARP00000085965|ENSDART00000091532|ENSDARG00000062936|ndnf	ENSMZEG00005020642	ENSONIG00000029693
Glycoprotein	ndnfl	ENSDARP00000129297|ENSDART00000153897|ENSDARG00000076462|ndnfl	ENSMZEG00005027417	ENSONIG00000041121
Glycoprotein	NELL1(Human)	ENSP00000298925.5|ENST00000298925.9|ENSG00000165973.19|OTTHUMG00000166042.3|OTTHUMT00000387587.1|NELL1-201|NELL1|838	ENSMZEG00005014408	ENSONIG00000007149
Glycoprotein	nell2a	ENSDARP00000111598|ENSDART00000126863|ENSDARG00000090690|nell2a	ENSMZEG00005008701	ENSONIG00000008749
Glycoprotein	nid1a	ENSDARP00000090249|ENSDART00000099475|ENSDARG00000068710|nid1a	ENSMZEG00005009990	ENSONIG00000010118
Glycoprotein	nid1b	tr|A0A0G2L836|A0A0G2L836_DANRE Nidogen 1b OS=Danio rerio OX=7955 GN=nid1b PE=1 SV=1	ENSMZEG00005021580	ENSONIG00000018134
Glycoprotein	nid2a	ENSDARP00000129416|ENSDART00000154473|ENSDARG00000075707|nid2a	ENSMZEG00005001685	ENSONIG00000011939
Glycoprotein	NOV(Human)	sp|P48745|CCN3_HUMAN CCN family member 3 OS=Homo sapiens OX=9606 GN=CCN3 PE=1 SV=1	ENSMZEG00005025563	ENSONIG00000007020
Glycoprotein	npnt	ENSDARP00000020901|ENSDART00000018469|ENSDARG00000018721|npnta	ENSMZEG00005019704	ENSONIG00000017524
Glycoprotein	ntn1a	ENSDARP00000133934|ENSDART00000157527|ENSDARG00000105112|ntn1a	ENSMZEG00005023923	ENSONIG00000018154
Glycoprotein	ntn1b	ENSDARP00000038885|ENSDART00000039482|ENSDARG00000022531|ntn1b	ENSMZEG00005004358
Glycoprotein	NTN3(Human)	ENSP00000293973.1|ENST00000293973.2|ENSG00000162068.2|OTTHUMG00000128867.2|OTTHUMT00000250812.2|NTN3-201|NTN3|580	ENSMZEG00005011774	ENSONIG00000020028
Glycoprotein	ntn4_1	ENSDARP00000132076|ENSDART00000165680|ENSDARG00000102066|ntn4	ENSMZEG00005015487	ENSONIG00000017835
Glycoprotein	ntn4_2	ENSDARP00000132076|ENSDART00000165680|ENSDARG00000102066|ntn4	ENSMZEG00005006663	ENSONIG00000008581
Glycoprotein	ntn5	ENSDARP00000142728|ENSDART00000174001|ENSDARG00000036422|ntn5	ENSMZEG00005021650	ENSONIG00000018975
Glycoprotein	ntng1a_1	ENSDARP00000096521|ENSDART00000105743|ENSDARG00000014973|ntng1a	ENSMZEG00005020221	ENSONIG00000004765
Glycoprotein	ntng1a_2	ENSDARP00000096521|ENSDART00000105743|ENSDARG00000014973|ntng1a	ENSMZEG00005024359	ENSONIG00000018534
Glycoprotein	ntng2a_1	ENSDARP00000099713|ENSDART00000114432|ENSDARG00000077367|ntng2a	ENSMZEG00005002974	ENSONIG00000007373
Glycoprotein	ntng2a_2	ENSDARP00000099713|ENSDART00000114432|ENSDARG00000077367|ntng2a	ENSMZEG00005020820	ENSONIG00000000789
Glycoprotein	oit3	ENSDARP00000107933|ENSDART00000128422|ENSDARG00000087227|oit3	ENSMZEG00005008239	ENSONIG00000009912
Glycoprotein	otog	ENSDARP00000142739|ENSDART00000173538|ENSDARG00000068460|otog	ENSMZEG00005015041	ENSONIG00000007889
Glycoprotein	Otogl(Mouse)	ENSMUSP00000129467.3|ENSMUST00000165341.5|ENSMUSG00000091455.5|OTTMUSG00000043359.2|OTTMUST00000113767.2|Otogl-201|Otogl|2325	ENSMZEG00005020165
Glycoprotein	otol1a	ENSDARP00000116485|ENSDART00000132859|ENSDARG00000001771|otol1a	ENSMZEG00005025509	ENSONIG00000009958
Glycoprotein	otol1b	ENSDARP00000076378|ENSDART00000081940|ENSDARG00000058960|otol1b	ENSMZEG00005016878	ENSONIG00000003660
Glycoprotein	paplna	ENSDARP00000082618|ENSDART00000088185|ENSDARG00000027867|paplna	ENSMZEG00005011337	ENSONIG00000000376
Glycoprotein	paplnb	ENSDARP00000061835|ENSDART00000061836|ENSDARG00000042186|paplnb	ENSMZEG00005018145	ENSONIG00000014740
Glycoprotein	pcolce2b	ENSDARP00000072417|ENSDART00000077951|ENSDARG00000055575|pcolce2b	ENSMZEG00005021986	ENSONIG00000005906
Glycoprotein	pcolcea	ENSDARP00000073925|ENSDART00000079469|ENSDARG00000056913|pcolcea	ENSMZEG00005013775	ENSONIG00000001827
Glycoprotein	pcolceb	ENSDARP00000068296|ENSDART00000073806|ENSDARG00000052057|pcolceb	ENSMZEG00005021388	ENSONIG00000009245
Glycoprotein	postna	ENSDARP00000018627|ENSDART00000017240|ENSDARG00000043806|postna	ENSMZEG00005024382	ENSONIG00000004628
Glycoprotein	postnb	ENSDARP00000135751|ENSDART00000157854|ENSDARG00000104267|postnb	ENSMZEG00005011673	ENSONIG00000005562
Glycoprotein	pxdn	ENSDARP00000131814|ENSDART00000170951|ENSDARG00000098733|pxdn	ENSMZEG00005004087	ENSONIG00000011663
Glycoprotein	reln	tr|G1BJ50|G1BJ50_DANRE Reelin OS=Danio rerio OX=7955 GN=reln PE=2 SV=1	ENSMZEG00005005482	ENSONIG00000008476
Glycoprotein	rspo1	ENSDARP00000135809|ENSDART00000160671|ENSDARG00000104340|rspo1	ENSMZEG00005008365	ENSONIG00000016302
Glycoprotein	rspo2	ENSDARP00000100941|ENSDART00000109124|ENSDARG00000079570|rspo2	ENSMZEG00005011369	ENSONIG00000000046
Glycoprotein	rspo3	ENSDARP00000058577|ENSDART00000058578|ENSDARG00000070081|rspo3	ENSMZEG00005005669	ENSONIG00000007215
Glycoprotein	rspo4	ENSDARP00000123862|ENSDART00000149003|ENSDARG00000038593|rspo4	ENSMZEG00005016753	ENSONIG00000000392
Glycoprotein	sbspon_1	tr|A0A0G2KRV3|A0A0G2KRV3_DANRE Telomeric repeat-binding factor	ENSMZEG00005021495	ENSONIG00000014294
Glycoprotein	sbspon_2	tr|A0A0G2KRV3|A0A0G2KRV3_DANRE Telomeric repeat-binding factor	ENSMZEG00005021498	ENSONIG00000014288
Glycoprotein	Slamf6(Mouse)_Mze_1	ENSMUSP00000130610.2|ENSMUST00000171330.7|ENSMUSG00000015314.11|OTTMUSG00000050091.2|OTTMUST00000127386.1|Slamf6-201|Slamf6|331	ENSMZEG00005013308	ENSONIG00000004189
Glycoprotein	Slamf6(Mouse)_Mze_2	ENSMUSP00000130610.2|ENSMUST00000171330.7|ENSMUSG00000015314.11|OTTMUSG00000050091.2|OTTMUST00000127386.1|Slamf6-201|Slamf6|331	ENSMZEG00005013324
Glycoprotein	slit1a_1	ENSDARP00000066079|ENSDART00000066080|ENSDARG00000044954|slit1a	ENSMZEG00005014549	ENSONIG00000000202
Glycoprotein	slit1a_2	ENSDARP00000066079|ENSDART00000066080|ENSDARG00000044954|slit1a	ENSMZEG00005000186	ENSONIG00000018325
Glycoprotein	slit2	ENSDARP00000026343|ENSDART00000007531|ENSDARG00000004246|slit2	ENSMZEG00005023668	ENSONIG00000009028
Glycoprotein	slit3	ENSDARP00000112770|ENSDART00000146299|ENSDARG00000034268|slit3	ENSMZEG00005000754	ENSONIG00000000988
Glycoprotein	smoc1	ENSDARP00000112037|ENSDART00000125617|ENSDARG00000088255|smoc1	ENSMZEG00005011593	ENSONIG00000019643
Glycoprotein	smoc2	tr|G9LQV9|G9LQV9_DANRE Secreted modular calcium-binding protein 2 OS=Danio rerio OX=7955 GN=smoc2 PE=2 SV=1	ENSMZEG00005010946	ENSONIG00000010242
Glycoprotein	sned1	ENSDARP00000065254|ENSDART00000065255|ENSDARG00000044433|sned1	ENSMZEG00005009089	ENSONIG00000019302
Glycoprotein	sparc	ENSDARP00000039659|ENSDART00000039660|ENSDARG00000019353|sparc	ENSMZEG00005004476	ENSONIG00000004238
Glycoprotein	sparcl1	ENSDARP00000078028|ENSDART00000083593|ENSDARG00000074989|sparcl1	ENSMZEG00005022624	ENSONIG00000014544
Glycoprotein	spon1a	ENSDARP00000026964|ENSDART00000016983|ENSDARG00000010029|spon1a	ENSMZEG00005012177	ENSONIG00000005578
Glycoprotein	spon1b	ENSDARP00000034007|ENSDART00000031828|ENSDARG00000023694|spon1b	ENSMZEG00005012746	ENSONIG00000011032
Glycoprotein	spon2a	ENSDARP00000037261|ENSDART00000032141|ENSDARG00000025465|spon2a	ENSMZEG00005012416	ENSONIG00000012972
Glycoprotein	spon2b	ENSDARP00000023050|ENSDART00000010148|ENSDARG00000002732|spon2b	ENSMZEG00005000941	ENSONIG00000001044
Glycoprotein	srpx	ENSDARP00000023792|ENSDART00000026551|ENSDARG00000010318|srpx	ENSMZEG00005022268	ENSONIG00000014280
Glycoprotein	srpx2	ENSDARP00000045808|ENSDART00000045809|ENSDARG00000034559|srpx2	ENSMZEG00005007311	ENSONIG00000040165
Glycoprotein	svep1	ENSDARP00000142845|ENSDART00000173642|ENSDARG00000013526|svep1	ENSMZEG00005021038	ENSONIG00000012887
Glycoprotein	tecta	ENSDARP00000077331|ENSDART00000082896|ENSDARG00000059558|tecta	ENSMZEG00005010758	ENSONIG00000009508
Glycoprotein	tectb	ENSDARP00000066577|ENSDART00000066578|ENSDARG00000045268|tectb	ENSMZEG00005007107	ENSONIG00000018289
Glycoprotein	tgfbi	ENSDARP00000096711|ENSDART00000105933|ENSDARG00000071586|tgfbi	ENSMZEG00005007018	ENSONIG00000001569
Glycoprotein	thbs1a	ENSDARP00000087091|ENSDART00000092659.1|ENSDARG00000063430|	ENSMZEG00005002139	ENSONIG00000015950
Glycoprotein	thbs1b_1	ENSDARP00000012255|ENSDART00000017090|ENSDARG00000010785|thbs1b	ENSMZEG00005009540	ENSONIG00000012080
Glycoprotein	thbs1b_2	ENSDARP00000012255|ENSDART00000017090|ENSDARG00000010785|thbs1b	ENSMZEG00005003637	ENSONIG00000005747
Glycoprotein	thbs2a	ENSDARP00000079472|ENSDART00000085037|ENSDARG00000060410|thbs2a	ENSMZEG00005005891	ENSONIG00000009805
Glycoprotein	thbs3a	ENSDARP00000057304|ENSDART00000057305|ENSDARG00000077641|thbs3a	ENSMZEG00005017167	ENSONIG00000002170
Glycoprotein	thbs4a	ENSDARP00000129945|ENSDART00000162541|ENSDARG00000102777|thbs4a	ENSMZEG00005017182	ENSONIG00000013733
Glycoprotein	thbs4b	ENSDARP00000093348|ENSDART00000102572|ENSDARG00000020072|thbs4b	ENSMZEG00005001057	ENSONIG00000007533
Glycoprotein	THSD4(Human)_Oni_1	ENSP00000261862.8|ENST00000261862.8|ENSG00000187720.15|OTTHUMG00000133389.7|-|THSD4-201|THSD4|1018	ENSMZEG00005005793	ENSONIG00000036094
Glycoprotein	THSD4(Human)_Oni_2	ENSP00000261862.8|ENST00000261862.8|ENSG00000187720.15|OTTHUMG00000133389.7|-|THSD4-201|THSD4|1018		ENSONIG00000002894
Glycoprotein	tinagl1	ENSDARP00000081530|ENSDART00000087096|ENSDARG00000061231|tinagl1	ENSMZEG00005005377	ENSONIG00000002394
Glycoprotein	tnc_1	ENSDARP00000010247|ENSDART00000026107|ENSDARG00000021948|tnc	ENSMZEG00005005860	ENSONIG00000011052
Glycoprotein	tnc_2	ENSDARP00000010247|ENSDART00000026107|ENSDARG00000021948|tnc	ENSMZEG00005003820	ENSONIG00000011931
Glycoprotein	tnfaip6	ENSDARP00000085308|ENSDART00000090875|ENSDARG00000093440|tnfaip6	ENSMZEG00005020957	ENSONIG00000013664
Glycoprotein	TNN(Human)	ENSP00000239462.4|ENST00000239462.9|ENSG00000120332.17|OTTHUMG00000034882.2|OTTHUMT00000084422.2|TNN-201|TNN|1299	ENSMZEG00005025474	ENSONIG00000009909
Glycoprotein	tnr	ENSDARP00000010406|ENSDART00000015827|ENSDARG00000020771|tnr	ENSMZEG00005025469	ENSONIG00000009896
Glycoprotein	tsku	ENSDARP00000110663|ENSDART00000127795|ENSDARG00000040815|tsku	ENSMZEG00005013607	ENSONIG00000036846
Glycoprotein	tspeara	ENSDARP00000098431|ENSDART00000110470|ENSDARG00000077580|tspeara	ENSMZEG00005001651	ENSONIG00000001315
Glycoprotein	tspearb	ENSDARP00000106732|ENSDART00000122558|ENSDARG00000089235|tspearb		ENSONIG00000004261
Glycoprotein	VIT(Human)	ENSP00000368543.3|ENST00000379241.7|ENSG00000205221.13|OTTHUMG00000152149.3|OTTHUMT00000353773.1|VIT-201|VIT|656	ENSMZEG00005009462	ENSONIG00000010061
Glycoprotein	vtna	ENSDARP00000072202|ENSDART00000077736|ENSDARG00000055388|vtna	ENSMZEG00005015038	ENSONIG00000031256
Glycoprotein	vtnb	ENSDARP00000070414|ENSDART00000075935|ENSDARG00000053831|vtnb	ENSMZEG00005025236	ENSONIG00000040576
Glycoprotein	vwa1_1	ENSDARP00000099327|ENSDART00000110868|ENSDARG00000075468|vwa1	ENSMZEG00005011251	ENSONIG00000018922
Glycoprotein	vwa1_2	ENSDARP00000099327|ENSDART00000110868|ENSDARG00000075468|vwa1	ENSMZEG00005021656	ENSONIG00000009327
Glycoprotein	vwa2	ENSDARP00000127116|ENSDART00000152985|ENSDARG00000075441|vwa2	ENSMZEG00005025318	ENSONIG00000016388
Glycoprotein	VWA5A_Mze_1	tr|A0A0R4IR47|Release 2018_03/2018_03|28-Mar-2018	ENSMZEG00005006951
Glycoprotein	VWA5A_Mze_10	tr|A0A0R4IR47|Release 2018_03/2018_03|28-Mar-2018	ENSMZEG00005013987
Glycoprotein	VWA5A_Mze_11	tr|A0A0R4IR47|Release 2018_03/2018_03|28-Mar-2018	ENSMZEG00005026138
Glycoprotein	VWA5A_Mze_2	tr|A0A0R4IR47|Release 2018_03/2018_03|28-Mar-2018	ENSMZEG00005007162
Glycoprotein	VWA5A_Mze_3	tr|A0A0R4IR47|Release 2018_03/2018_03|28-Mar-2018	ENSMZEG00005026137
Glycoprotein	VWA5A_Mze_4	tr|A0A0R4IR47|Release 2018_03/2018_03|28-Mar-2018	ENSMZEG00005006777
Glycoprotein	VWA5A_Mze_5	tr|A0A0R4IR47|Release 2018_03/2018_03|28-Mar-2018	ENSMZEG00005013945
Glycoprotein	VWA5A_Mze_6	tr|A0A0R4IR47|Release 2018_03/2018_03|28-Mar-2018	ENSMZEG00005013927
Glycoprotein	VWA5A_Mze_7	tr|A0A0R4IR47|Release 2018_03/2018_03|28-Mar-2018	ENSMZEG00005007009
Glycoprotein	VWA5A_Mze_8	tr|A0A0R4IR47|Release 2018_03/2018_03|28-Mar-2018	ENSMZEG00005007269
Glycoprotein	VWA5A_Mze_9	tr|A0A0R4IR47|Release 2018_03/2018_03|28-Mar-2018	ENSMZEG00005007097
Glycoprotein	VWA5A_Oni_1	tr|A0A0R4IR47|Release 2018_03/2018_03|28-Mar-2018		ENSONIG00000031265
Glycoprotein	VWA5A_Oni_2	tr|A0A0R4IR47|Release 2018_03/2018_03|28-Mar-2018		ENSONIG00000029512
Glycoprotein	VWA5A_Oni_3	tr|A0A0R4IR47|Release 2018_03/2018_03|28-Mar-2018		ENSONIG00000005175
Glycoprotein	VWA5A_Oni_4	tr|A0A0R4IR47|Release 2018_03/2018_03|28-Mar-2018		ENSONIG00000030515
Glycoprotein	VWA5A_Oni_5	tr|A0A0R4IR47|Release 2018_03/2018_03|28-Mar-2018		ENSONIG00000030955
Glycoprotein	VWA5A_Oni_6	tr|A0A0R4IR47|Release 2018_03/2018_03|28-Mar-2018		ENSONIG00000029759
Glycoprotein	VWA5A_Oni_7	tr|A0A0R4IR47|Release 2018_03/2018_03|28-Mar-2018		ENSONIG00000030231
Glycoprotein	VWA5A_Oni_8	tr|A0A0R4IR47|Release 2018_03/2018_03|28-Mar-2018		ENSONIG00000043143
Glycoprotein	vwa5b1	ENSDARP00000120567|ENSDART00000146269|ENSDARG00000059705|vwa5b1	ENSMZEG00005023343	ENSONIG00000016606
Glycoprotein	vwa5b2	ENSDARP00000135268|ENSDART00000168469|ENSDARG00000075886|vwa5b2	ENSMZEG00005019567	ENSONIG00000010076
Glycoprotein	vwa7	ENSDARP00000123178|ENSDART00000132833|ENSDARG00000061462|vwa7	ENSMZEG00005013899	ENSONIG00000005178
Glycoprotein	vwa9	ENSDARP00000060730|ENSDART00000060731|ENSDARG00000041429|ints14	ENSMZEG00005022613	ENSONIG00000015414
Glycoprotein	vwde	ENSDARP00000140104|ENSDART00000169487|ENSDARG00000103443|vwde	ENSMZEG00005015496	ENSONIG00000006542
Glycoprotein	VWDE(Human)_1	ENSP00000275358.3|ENST00000275358.8|ENSG00000146530.15|OTTHUMG00000152315.9|OTTHUMT00000325870.4|VWDE-201|VWDE|1590	ENSMZEG00005015481	ENSONIG00000006536
Glycoprotein	VWDE(Human)_2	ENSP00000275358.3|ENST00000275358.8|ENSG00000146530.15|OTTHUMG00000152315.9|OTTHUMT00000325870.4|VWDE-201|VWDE|1590	ENSMZEG00005015796	ENSONIG00000012262
Glycoprotein	vwf	ENSDARP00000101847|ENSDART00000114690|ENSDARG00000077231|vwf	ENSMZEG00005021239	ENSONIG00000015097
Glycoprotein	wisp1a	ENSDARP00000070978|ENSDART00000076506|ENSDARG00000054331|ccn4a	ENSMZEG00005006557	ENSONIG00000002107
Glycoprotein	wisp2	ENSDARP00000053992|ENSDART00000053993|ENSDARG00000077882|ccn5	ENSMZEG00005023497	ENSONIG00000016508
Glycoprotein	wisp3	ENSDARP00000095576|ENSDART00000104806|ENSDARG00000071048|ccn6	ENSMZEG00005015756	ENSONIG00000011364
Glycoprotein	ZP1(Human)_1	ENSP00000278853.5|ENST00000278853.10|ENSG00000149506.12|OTTHUMG00000167797.2|OTTHUMT00000396329.2|ZP1-201|ZP1|638	ENSMZEG00005019048	ENSONIG00000014760
Glycoprotein	ZP1(Human)_2	ENSP00000278853.5|ENST00000278853.10|ENSG00000149506.12|OTTHUMG00000167797.2|OTTHUMT00000396329.2|ZP1-201|ZP1|638	ENSMZEG00005019465	ENSONIG00000014876
Glycoprotein	ZP1(Human)_3	ENSP00000278853.5|ENST00000278853.10|ENSG00000149506.12|OTTHUMG00000167797.2|OTTHUMT00000396329.2|ZP1-201|ZP1|638	ENSMZEG00005025439	ENSONIG00000009825
Glycoprotein	zp3_1	tr|Q6NW70|Q6NW70_DANRE Zona pellucida sperm-binding protein 3 OS=Danio rerio OX=7955 GN=zp3 PE=2 SV=2	ENSMZEG00005002106	ENSONIG00000010507
Glycoprotein	zp3_2	tr|Q6NW70|Q6NW70_DANRE Zona pellucida sperm-binding protein 3 OS=Danio rerio OX=7955 GN=zp3 PE=2 SV=2	ENSMZEG00005005621	ENSONIG00000012180
Glycoprotein	zp3_3	tr|Q6NW70|Q6NW70_DANRE Zona pellucida sperm-binding protein 3 OS=Danio rerio OX=7955 GN=zp3 PE=2 SV=2	ENSMZEG00005019471	ENSONIG00000014877
Glycoprotein	zp3_4	tr|Q6NW70|Q6NW70_DANRE Zona pellucida sperm-binding protein 3 OS=Danio rerio OX=7955 GN=zp3 PE=2 SV=2	ENSMZEG00005022574	ENSONIG00000003953
Glycoprotein	zp3_5	tr|Q6NW70|Q6NW70_DANRE Zona pellucida sperm-binding protein 3 OS=Danio rerio OX=7955 GN=zp3 PE=2 SV=2		ENSONIG00000031692
Glycoprotein	zp3b	ENSDARP00000058255|ENSDART00000058256|ENSDARG00000039828|zp3b	ENSMZEG00005025504	ENSONIG00000009952
Glycoprotein	zp3c	ENSDARP00000123019|ENSDART00000143474|ENSDARG00000092919|zp3c	ENSMZEG00005009033	ENSONIG00000036390
Glycoprotein	Zp3r(Mouse)_1	ENSMUSP00000045443.5|ENSMUST00000039862.11|ENSMUSG00000042554.11|OTTMUSG00000026758.2|OTTMUST00000066182.1|Zp3r-201|Zp3r|579	ENSMZEG00005022258	ENSONIG00000041342
Glycoprotein	Zp3r(Mouse)_2	ENSMUSP00000045443.5|ENSMUST00000039862.11|ENSMUSG00000042554.11|OTTMUSG00000026758.2|OTTMUST00000066182.1|Zp3r-201|Zp3r|579	ENSMZEG00005022254	ENSONIG00000016642
Glycoprotein	zpld1a	ENSDARP00000124521|ENSDART00000149140|ENSDARG00000061835|zpld1a	ENSMZEG00005023471	ENSONIG00000013620
Glycoprotein	zpld1b	ENSDARP00000086992|ENSDART00000092560|ENSDARG00000063372|zpld1b	ENSMZEG00005004732	ENSONIG00000011156
Proteoglycan	acana	ENSDARP00000024325|ENSDART00000003690|ENSDARG00000035891|acana	ENSMZEG00005016382
Proteoglycan	acanb	ENSDARP00000124852|ENSDART00000149917|ENSDARG00000045799|acanb	ENSMZEG00005011488	ENSONIG00000015637
Proteoglycan	aspn	ENSDARP00000064797|ENSDART00000064798|ENSDARG00000002192|aspn	ENSMZEG00005017093	ENSONIG00000000479
Proteoglycan	bcan	ENSDARP00000140252|ENSDART00000162835|ENSDARG00000099412|bcan	ENSMZEG00005009361	ENSONIG00000001543
Proteoglycan	bgna	ENSDARP00000017536|ENSDART00000027225|ENSDARG00000017884|bgna	ENSMZEG00005027109	ENSONIG00000012384
Proteoglycan	chad	ENSDARP00000066263|ENSDART00000066264|ENSDARG00000045071|chad	ENSMZEG00005008601	ENSONIG00000018179
Proteoglycan	chadla	ENSDARP00000129006|ENSDART00000154724|ENSDARG00000055160|chadla	ENSMZEG00005003455	ENSONIG00000008467
Proteoglycan	chadlb_Oni_1	ENSDARP00000127208|ENSDART00000153248|ENSDARG00000075903|chadlb	ENSMZEG00005019149	ENSONIG00000019699
Proteoglycan	chadlb_Oni_2	ENSDARP00000127208|ENSDART00000153248|ENSDARG00000075903|chadlb		ENSONIG00000031087
Proteoglycan	dcn	ENSDARP00000025940|ENSDART00000013085|ENSDARG00000012066|dcn	ENSMZEG00005005461	ENSONIG00000034299
Proteoglycan	epyc	ENSDARP00000073978|ENSDART00000079523|ENSDARG00000056950|epyc	ENSMZEG00005005416	ENSONIG00000011449
Proteoglycan	esm1	ENSDARP00000132994|ENSDART00000169320|ENSDARG00000104370|esm1	ENSMZEG00005020048	ENSONIG00000007673
Proteoglycan	fmodb	ENSDARP00000119637|ENSDART00000141516|ENSDARG00000010294|fmodb	ENSMZEG00005023740	ENSONIG00000017292
Proteoglycan	hapln1a	ENSDARP00000101940|ENSDART00000111589|ENSDARG00000089769|hapln1a	ENSMZEG00005014602	ENSONIG00000015922
Proteoglycan	hapln1b	ENSDARP00000062630|ENSDART00000062631|ENSDARG00000068516|hapln1b	ENSMZEG00005011860	ENSONIG00000011374
Proteoglycan	hapln2	ENSDARP00000081583|ENSDART00000087149|ENSDARG00000003903|hapln2	ENSMZEG00005009372	ENSONIG00000001547
Proteoglycan	hapln3_Cichlid_1	ENSDARP00000067322|ENSDART00000067323|ENSDARG00000045802|hapln3	ENSMZEG00005012228	ENSONIG00000013302
Proteoglycan	hapln3_Cichlid_2	ENSDARP00000067322|ENSDART00000067323|ENSDARG00000045802|hapln3	ENSMZEG00005011511	ENSONIG00000015632
Proteoglycan	hapln4	ENSDARP00000113168|ENSDART00000136016|ENSDARG00000018542|hapln4	ENSMZEG00005010581	ENSONIG00000002482
Proteoglycan	hspg2_Cichlid_1	ENSDARP00000100979|ENSDART00000111029|ENSDARG00000076564|hspg2	ENSMZEG00005004121	ENSONIG00000016343
Proteoglycan	hspg2_Cichlid_2	ENSDARP00000100979|ENSDART00000111029|ENSDARG00000076564|hspg2	ENSMZEG00005022297	ENSONIG00000016621
Proteoglycan	impg1a	ENSDARP00000122311|ENSDART00000131825|ENSDARG00000077187|impg1a	ENSMZEG00005022242	ENSONIG00000018753
Proteoglycan	impg1b	ENSDARP00000128400|ENSDART00000154104|ENSDARG00000074839|impg1b		ENSONIG00000003638
Proteoglycan	impg2b	ENSDARP00000133706|ENSDART00000163352|ENSDARG00000100288|impg2b	ENSMZEG00005021841	ENSONIG00000006699
Proteoglycan	kera	ENSDARP00000073976|ENSDART00000079521|ENSDARG00000056938|kera	ENSMZEG00005005437	ENSONIG00000011450
Proteoglycan	lum	ENSDARP00000119600|ENSDART00000139919|ENSDARG00000045580|lum	ENSMZEG00005005454	ENSONIG00000037870
Proteoglycan	ncana	ENSDARP00000137585|ENSDART00000168568|ENSDARG00000100128|CU861477.1	ENSMZEG00005010552
Proteoglycan	ncanb	ENSDARP00000020815|ENSDART00000005724|ENSDARG00000005783|ncanb		ENSONIG00000042723
Proteoglycan	nyx	ENSDARP00000083002|ENSDART00000088569|ENSDARG00000061791|nyx	ENSMZEG00005020648	ENSONIG00000016267
Proteoglycan	ogn_Cichlid_1	ENSDARP00000064800|ENSDART00000064801|ENSDARG00000044132|ogna	ENSMZEG00005017104	ENSONIG00000000488
Proteoglycan	ogn_Cichlid_2	ENSDARP00000064800|ENSDART00000064801|ENSDARG00000044132|ogna	ENSMZEG00005023709	ENSONIG00000017318
Proteoglycan	podn	ENSDARP00000119380|ENSDART00000138132|ENSDARG00000019025|podn	ENSMZEG00005010982	ENSONIG00000019220
Proteoglycan	prelp	ENSDARP00000129413|ENSDART00000155521|ENSDARG00000070597|prelp	ENSMZEG00005001079	ENSONIG00000019287
Proteoglycan	prg4a	ENSDARP00000012078|ENSDART00000014785|ENSDARG00000010482|prg4a		ENSONIG00000016584
Proteoglycan	prg4b	ENSDARP00000118320|ENSDART00000134305|ENSDARG00000028163|prg4b	ENSMZEG00005018647	ENSONIG00000010033
Proteoglycan	spock1	ENSDARP00000101212|ENSDART00000109378|ENSDARG00000074644|spock1	ENSMZEG00005000438	ENSONIG00000004941
Proteoglycan	spock2_Cichlid_1	ENSDARP00000100863|ENSDART00000110061|ENSDARG00000075393|spock2	ENSMZEG00005001034	ENSONIG00000016097
Proteoglycan	spock2_Cichlid_2	ENSDARP00000100863|ENSDART00000110061|ENSDARG00000075393|spock2	ENSMZEG00005027608	ENSONIG00000018505
Proteoglycan	spock3	ENSDARP00000093744|ENSDART00000102969|ENSDARG00000070266|spock3	ENSMZEG00005023636	ENSONIG00000014601
Proteoglycan	srgn	ENSDARP00000065651|ENSDART00000065652|ENSDARG00000077069|srgn	ENSMZEG00005011597	ENSONIG00000028635
Proteoglycan	vcanb	ENSDARP00000119809|ENSDART00000144973|ENSDARG00000103515|vcana	ENSMZEG00005011787	ENSONIG00000011373
Proteoglycan	vcana	ENSDARP00000003376|ENSDART00000012522|ENSDARG00000009401|vcanb	ENSMZEG00005014615	ENSONIG00000015920

## Sheet: Supplementary File 1c
label_index	log2FC_HLip_tip_vs_Nlip	log2FC_HLip_base_vs_Nlip	log2FC_HLip_tip_vs_HLip_base	pval_HLip_tip_vs_Nlip	pval_HLip_base_vs_Nlip	pval_HLip_tip_vs_HLip_base
Cytochrome c oxidase subunit 2_A0A0K2CIR1	-0.321653	-0.0705465	-0.251106	0.0214272	0.52031	0.126794
NADH-ubiquinone oxidoreductase chain 3_A0A0K2CIV9	0.124883	0.160901	-0.0360183	0.104779	0.311213	0.807215
Cytochrome b_A0A0K2CIW3	0.0102645	0.0120752	-0.00181067	0.928816	0.896394	0.980458
ATP synthase subunit a_A0A0K2CJC3	0.242432	0.0186498	0.223782	0.0696803	0.875301	0.0599412
Signal sequence receptor subunit alpha_A0A3P9AQX7	0.109338	-0.134699	0.244037	0.626237	0.581247	0.0724911
Coactosin like F-actin binding protein 1_A0A3P9AR16	-0.144366	-0.0712558	-0.0731099	0.34258	0.62349	0.149506
Tryptase-2_A0A3P9AR75;A0A3P9AR28	1.32898	1.58051	-0.251534	0.021726	0.0150511	0.418917
Interferon-induced protein 44_A0A3P9AR40	0.224286	0.258392	-0.0341058	0.119801	0.0560317	0.709707
Catechol O-methyltransferase domain-containing protein 1_A0A3P9AR69;A0A3P9AR82	-0.0678389	0.103168	-0.171006	0.412571	0.222455	0.0894875
Apolipoprotein B-100-like_A0A3P9AR80	1.11992	1.09063	0.0292878	0.160301	0.233508	0.963214
Coatomer subunit beta_A0A3P9ARB8	0.0482633	0.0413615	0.00690186	0.345776	0.313343	0.815135
Hippocalcin-like protein 1_A0A3P9DIH0;A0A3P9ATV8;A0A3P9ATN7;A0A3P9ARC3	0.212	0.0890177	0.122982	0.0312201	0.497177	0.355732
Importin subunit alpha_A0A3P9ARD8	-0.0458404	-0.0431824	-0.00265802	0.269332	0.214681	0.952165
RNA helicase_A0A3P9AS85;A0A3P9ARF1;A0A3P9ARH7;A0A3P9CED1	-0.0298194	-0.00963066	-0.0201887	0.698482	0.913409	0.76371
Protein SSUH2 homolog_A0A3P9ASA6;A0A3P9ARF6	-0.44297	-0.554359	0.111389	0.102012	0.020503	0.711819
Vacuolar protein sorting-associated protein 13C_A0A3P9ARF8;A0A3P9AR25	0.157832	0.234757	-0.0769246	0.0165108	0.0107122	0.181419
Sulfotransferase_A0A3P9ARH4	0.285354	0.342578	-0.0572236	0.0289694	0.0218264	0.46704
Prostaglandin E synthase 3_A0A3P9ARJ0	-0.073114	-0.0281859	-0.0449281	0.22038	0.590652	0.22488
Glutathione peroxidase_A0A3P9ARP6	0.264509	0.296007	-0.0314981	0.127959	0.0501709	0.736292
Far upstream element binding protein 3_A0A3P9AS17;A0A3P9ARQ1	-0.0149169	-0.0136919	-0.00122501	0.814145	0.811867	0.976391
Aldehyde dehydrogenase_A0A3P9ARR9	-0.139677	0.0362476	-0.175925	0.0428594	0.742577	0.161289
Annexin_A0A3P9ARS0	-0.331131	-0.226452	-0.104678	0.00485607	0.00435531	0.151167
Aspartate aminotransferase_A0A3P9ART3	0.0350558	0.134014	-0.0989586	0.699604	0.054862	0.271754
Proteasome subunit alpha type_A0A3P9ARV3;A0A3P9D4Y2;A0A3P9ARS3	-0.087031	-0.00333196	-0.083699	0.129068	0.938712	0.0277403
Peptidyl-prolyl cis-trans isomerase_A0A3P9ARW4;A0A3P9ARZ2	-0.129378	-0.0450244	-0.0843538	0.415478	0.661034	0.658302
Uncharacterized LOC101481927_A0A3P9ARX0	0.188302	0.519178	-0.330876	0.266144	0.0135757	0.080781
Galectin_A0A3P9ARX8	0.133748	0.0697527	0.063995	0.143996	0.518794	0.608471
Flotillin_A0A3P9ARY2;A0A3P9DFM1	0.218895	0.20914	0.00975504	0.201381	0.320991	0.951936
Eukaryotic peptide chain release factor subunit 1_A0A3P9AS19	0.0345623	0.0343762	0.000186064	0.461811	0.0455655	0.996762
Ubiquitin specific peptidase 39_A0A3P9AS28	-0.165724	-0.122336	-0.0433879	0.160246	0.266095	0.676435
Guanine nucleotide-binding protein subunit alpha-11_A0A3P9ASA9;A0A3P9AS39	0.001206	0.0722482	-0.0710422	0.965532	0.101473	0.0670033
Signal transducer and activator of transcription_A0A3P9AS72;A0A3P9ASC3;A0A3P9AS42	0.0346727	0.00646884	0.0282039	0.701116	0.959846	0.827625
Cytochrome c oxidase subunit_A0A3P9AS99	-0.0584594	0.0460011	-0.104461	0.526709	0.486746	0.170577
Uncharacterized protein_A0A3P9ASD3;A0A3P9ASJ5;A0A3P9ASE2	0.0893909	0.225469	-0.136078	0.292362	0.0285026	0.128845
Myosin-9_A0A3P9ASE5	-0.0466999	-0.201349	0.154649	0.424121	0.0297695	0.0146522
Programmed cell death protein 10_A0A3P9ASF7	0.152432	0.0841007	0.0683315	0.029894	0.0990389	0.270116
Histone deacetylase 1_A0A3P9BE94;A0A3P9ASI1	-0.0263307	0.00530098	-0.0316317	0.792726	0.752529	0.753713
Chitobiase_A0A3P9ASI2	1.02451	0.92484	0.0996741	0.0915036	0.119815	0.823681
Tripeptidyl-peptidase 2_A0A3P9ASJ8;A0A3P9AT84;A0A3P9ASJ1	-0.107935	-0.0760347	-0.0319007	0.226739	0.166922	0.676488
Complement C5_A0A3P9ASR2	1.09934	0.941779	0.157562	0.000415436	0.00181821	0.122322
NOP58 ribonucleoprotein_A0A3P9ASY7;A0A3P9ASS7	0.0651071	0.0709588	-0.00585176	0.146387	0.131266	0.788132
Eukaryotic translation initiation factor 3 subunit I_A0A3P9AST1;A0A3P9ASU2	0.0888687	0.0526532	0.0362155	0.0248375	0.0915477	0.310454
MOB kinase activator 1A_A0A3P9ASV4	0.19528	0.189621	0.00565924	0.0246149	0.0513234	0.905685
Peptidyl-prolyl cis-trans isomerase_A0A3P9ASW1	-0.198334	-0.0589628	-0.139371	0.232331	0.600713	0.481993
Rho-related GTP-binding protein RhoB_A0A3P9BUC5;A0A3P9DNJ9;A0A3P9BHB6;A0A3P9BGZ1;A0A3P9B415;A0A3P9D1V6;A0A3P9C0V5;A0A3P9AT29;A0A3P9C118	-0.161951	-0.0606392	-0.101312	0.342274	0.686583	0.56632
40S ribosomal protein S2_A0A3P9AT48	-0.118522	-0.12378	0.00525869	0.118963	0.0464678	0.944791
Actin-related protein 2/3 complex subunit 4_A0A3P9AT80;A0A3P9ATH5	-0.214713	-0.256209	0.0414957	0.0109186	0.00721197	0.424545
60S ribosomal protein L22_A0A3P9AT82	-0.109443	-0.127368	0.0179248	0.101391	0.0629877	0.747569
Putative methyltransferase DDB_G0268948_A0A3P9ATA3	-0.00129081	0.0215453	-0.0228361	0.989262	0.784041	0.794733
Oxoglutarate dehydrogenase (succinyl-transferring)_A0A3P9ATD6;A0A3P9ATB3	-0.00896118	-0.0211973	0.0122361	0.851786	0.629438	0.612557
Aspartyl aminopeptidase_A0A3P9ATE2;A0A3P9AU74	-0.413088	-0.408461	-0.00462649	0.0499923	0.0446911	0.967148
SLIT-ROBO Rho GTPase activating protein 2_A0A3P9ATG1	-0.187866	-0.215466	0.0275999	0.0567228	0.14389	0.865331
GTPase IMAP family member 4_A0A3P9ATL0;A0A3P9ATN0	-0.0475399	-0.0360399	-0.0115	0.442514	0.442825	0.827003
Ig-like domain-containing protein_A0A3P9AVX5;A0A3P9ATP8;A0A3P9ATL2;A0A3P9AVU2;A0A3P9AUZ0;A0A3P9ATB5	1.38601	1.16816	0.217845	0.0812433	0.0169779	0.601382
Heterogeneous nuclear ribonucleoprotein K_A0A3P9ATL6	0.142979	0.191747	-0.048768	0.0447872	0.0332771	0.477325
Tubulin alpha chain_A0A3P9ATS3;A0A3P9ATN5	0.170273	0.247297	-0.077024	0.11288	0.00624628	0.37509
Laminin subunit beta-1_A0A3P9ATR0	0.191325	0.239593	-0.0482676	0.194432	0.158353	0.659998
Signal peptidase complex subunit 3_A0A3P9AWD8;A0A3P9ATW1	0.228944	0.300013	-0.0710685	9.23125e-05	0.000144561	0.0189867
Hemopexin_A0A3P9ATY8	0.85186	0.7791	0.0727599	0.0650536	0.0689385	0.813228
EPS8 like 2_A0A3P9AU19	-0.148356	-0.129129	-0.0192265	0.114479	0.467245	0.921983
60S ribosomal protein L23_A0A3P9AU55	-0.22005	-0.194536	-0.025514	0.00604554	0.00834095	0.616607
Heterogeneous nuclear ribonucleoprotein A0_A0A3P9AU60	-0.035232	-0.015886	-0.019346	0.62761	0.788493	0.816803
SWI/SNF-related matrix-associated actin-dependent regulator of chromatin subfamily E member 1_A0A3P9AU82	-0.119816	-0.0787419	-0.0410737	0.131868	0.0395667	0.572747
Serine/threonine-protein phosphatase 2A activator_A0A3P9AU93;A0A3P9AU91	0.173365	0.148651	0.0247135	0.00326588	0.0995406	0.709543
Heterogeneous nuclear ribonucleoprotein A0_A0A3P9AU95	-0.0947447	-0.095972	0.00122724	0.277529	0.248551	0.983914
Prolargin_A0A3P9AUA8;A0A3P9AUA0	0.0464847	0.369773	-0.323288	0.830586	0.0382767	0.0867395
Protein transport protein Sec31A_A0A3P9AUK1	0.1556	0.158841	-0.00324165	0.0122482	0.0168286	0.910314
Muscleblind like splicing regulator 1_A0A3P9B3M8;A0A3P9B3V4;A0A3P9BA52;A0A3P9BA68;A0A3P9B4C9;A0A3P9AUP5;A0A3P9AUV6;A0A3P9BBM3;A0A3P9CWX6;A0A3P9CX08;A0A3P9CYI4;A0A3P9BBM4;A0A3P9CWY1;A0A3P9B3S2;A0A3P9AVK1;A0A3P9B446	-0.175793	-0.193824	0.0180309	0.00286041	0.00204913	0.380602
Ezrin_A0A3P9AUR5;A0A3P9AUS6	0.0985939	0.195256	-0.0966617	0.46078	0.0574034	0.475734
UDP-glucose glycoprotein glucosyltransferase 1_A0A3P9AUT2;A0A3P9AUS8	-0.0493576	-0.0833397	0.0339822	0.372161	0.0665965	0.581289
Histone H4_A0A3P9AX54;A0A3P9B1S5;A0A3P9AYQ9;A0A3P9DFQ4;A0A3P9AYU8;A0A3P9AXE0;A0A3P9D2Q4;A0A3P9CR31;A0A3P9AY72;A0A3P9B440;A0A3P9CSE8;A0A3P9DEU5;A0A3P9D0K2;A0A3P9DFM4;A0A3P9BL89;A0A3P9DFD0;A0A3P9D5V6;A0A3P9CTP0;A0A3P9AUT3	0.20819	0.117677	0.0905131	0.271351	0.64369	0.612838
Dipeptidyl peptidase 3_A0A3P9AUT6;A0A3P9AVG4	0.0847179	0.0241329	0.060585	0.239725	0.671721	0.346552
Ectonucleotide pyrophosphatase/phosphodiesterase family member 1_A0A3P9AUX0	0.435536	0.420485	0.0150509	0.0219831	0.0480398	0.925415
Alkaline phosphatase_A0A3P9AV24;A0A3P9AV06	0.018416	0.0405112	-0.0220952	0.906034	0.617348	0.870368
Tight junction protein ZO-1_A0A3P9AV37;A0A3P9AV86;A0A3P9AV17	0.352445	0.234893	0.117552	0.0109421	0.112835	0.313291
AP-3 complex subunit mu-2_A0A3P9AV34;A0A3P9AVQ1	0.14737	0.0705707	0.076799	0.0914559	0.275131	0.177526
S-(hydroxymethyl)glutathione dehydrogenase_A0A3P9AV78	-0.026004	0.063371	-0.089375	0.906858	0.707815	0.636594
Uncharacterized protein_A0A3P9AWY4;A0A3P9DHD0;A0A3P9DFM0;A0A3P9C667;A0A3P9DGC1;A0A3P9B876;A0A3P9B1V6;A0A3P9AVA4;A0A3P9BWG2;A0A3P9D232	0.00804545	0.0131308	-0.00508538	0.92108	0.867132	0.952224
D-dopachrome decarboxylase_A0A3P9AVB3	0.330987	0.274466	0.0565208	0.0734004	0.0533734	0.678076
Protein FAM49B_A0A3P9AVC0	-0.0110241	0.0622165	-0.0732406	0.91253	0.559527	0.144345
Serine/threonine protein phosphatase 2A regulatory subunit_A0A3P9AVC1;A0A3P9AVL8;A0A3P9AVM8	-0.0246661	-0.00526338	-0.0194027	0.627801	0.87434	0.644173
Ig-like domain-containing protein_A0A3P9ARL3;A0A3P9AVT3;A0A3P9AVC2;A0A3P9AVF5;A0A3P9AVY1	1.34603	1.06832	0.27771	0.147405	0.027927	0.604187
Tumor-associated calcium signal transducer 2_A0A3P9CQ90;A0A3P9CQ65;A0A3P9AVD5	-0.439052	-0.225213	-0.213839	0.00363746	0.0166104	0.0669547
Histone H1-like_A0A3P9C982;A0A3P9BWB3;A0A3P9DEN8;A0A3P9AWT8;A0A3P9AY84;A0A3P9AX13;A0A3P9AVE7;A0A3P9B877	-0.171752	-0.27249	0.100738	0.286485	0.179802	0.518917
Envoplakin_A0A3P9AVG6	-0.328378	-0.137504	-0.190874	0.0161685	0.100305	0.152798
FAT atypical cadherin 3_A0A3P9AVK7	0.187397	0.24779	-0.0603936	0.0231891	0.0341266	0.512477
Obg-like ATPase 1_A0A3P9AVM5	-0.112795	-0.0833876	-0.0294075	0.193635	0.272558	0.769356
Serine/threonine-protein kinase TAO2_A0A3P9C8A7;A0A3P9AVX2;A0A3P9BJK7;A0A3P9BIY4;A0A3P9AVN0;A0A3P9DFA0	-0.0427899	-0.00519124	-0.0375986	0.328862	0.851538	0.273247
Tubulin polymerization promoting protein family member 3_A0A3P9AVP4	-0.170849	0.624061	-0.79491	0.201293	0.000649546	0.000471946
Heat shock protein 90 alpha family class B member 1_A0A3P9C2E8;A0A3P9AVU1	-0.0274231	-0.0223838	-0.00503929	0.794959	0.783989	0.967044
Eukaryotic translation initiation factor 2 subunit 1_A0A3P9AVW0	-0.0668379	-0.0429801	-0.0238577	0.149001	0.162954	0.544577
Alcohol dehydrogenase class-3_A0A3P9AVW3	0.0148982	0.0614644	-0.0465663	0.9306	0.722153	0.591707
Carboxypeptidase X, M14 family member 2_A0A3P9BHP7;A0A3P9BI35;A0A3P9BUP9;A0A3P9AVZ2	0.329164	0.175755	0.15341	0.104434	0.378665	0.36846
BUB3 mitotic checkpoint protein_A0A3P9AW04	0.0369375	0.00571074	0.0312267	0.325726	0.913075	0.52905
Lysozyme_A0A3P9AW05	0.382896	0.248672	0.134224	0.149551	0.131613	0.541257
60S ribosomal protein L3_A0A3P9AW64;A0A3P9AW13	-0.0962106	-0.110854	0.0146436	0.118247	0.0899699	0.564213
Prohibitin_A0A3P9AW15	0.19805	0.176447	0.0216033	0.00765019	0.00431195	0.49233
Heterochromatin protein 1-binding protein 3_A0A3P9AW33;A0A3P9AW40	0.187786	0.192683	-0.00489766	0.276078	0.149453	0.973783
Hexokinase_A0A3P9AWA2	0.132023	0.0669232	0.0650994	0.0649909	0.36259	0.231197
Oxysterol-binding protein_A0A3P9AWC8;A0A3P9AWB9	-0.377932	-0.0618792	-0.316052	0.0113607	0.549358	0.0175607
Complex I-PDSW_A0A3P9AZL8;A0A3P9AYS2;A0A3P9AWC7;A0A3P9DHS4;A0A3P9B0Q1	-0.128504	-0.0837619	-0.0447418	0.192322	0.183725	0.563149
Beta-glucuronidase_A0A3P9AWG2;A0A3P9AWG7	0.60906	0.46261	0.14645	0.342535	0.384041	0.8086
Small ubiquitin-related modifier_A0A3P9DC16;A0A3P9C5C1;A0A3P9DCJ4;A0A3P9BKZ5;A0A3P9C5P7;A0A3P9AWJ1	-0.101233	-0.0785315	-0.0227012	0.159092	0.0684196	0.691627
Tyrosine-protein kinase_A0A3P9CGG5;A0A3P9AXL7;A0A3P9CGH3;A0A3P9AXJ6;A0A3P9AWJ6;A0A3P9CX99	0.0155695	0.0917429	-0.0761734	0.874315	0.124585	0.437539
NADH-cytochrome b5 reductase_A0A3P9AWK0	0.401827	0.437848	-0.0360207	0.00268198	0.0027293	0.310758
Isocitrate dehydrogenase [NAD] subunit, mitochondrial_A0A3P9AWL5;A0A3P9AWK2	0.228919	0.274332	-0.0454133	0.0220088	0.00964886	0.545851
RNA transcription, translation and transport factor protein_A0A3P9AWP3	0.00121864	-0.0401915	0.0414101	0.987444	0.569075	0.478345
G protein pathway suppressor 1_A0A3P9AWP9	-0.0425427	-0.0608033	0.0182607	0.455946	0.509179	0.836093
Nidogen 2_A0A3P9AWU4;A0A3P9AWS6;A0A3P9AWQ3	0.0477494	0.04305	0.00469933	0.656108	0.646361	0.955956
Histone H3_A0A3P9DB32;A0A3P9D1H3;A0A3P9DFR4;A0A3P9CK52;A0A3P9D5X6;A0A3P9B9I6;A0A3P9CTW9;A0A3P9CUH5;A0A3P9AYJ2;A0A3P9D3P7;A0A3P9DGF4;A0A3P9CR20;A0A3P9CSD8;A0A3P9CLC0;A0A3P9AWS4	-0.119331	-0.0394752	-0.0798558	0.192036	0.62584	0.182974
Serine/arginine-rich splicing factor 2_A0A3P9B6B7;A0A3P9AWW7	-0.0605767	-0.0243847	-0.0361919	0.127884	0.567951	0.27894
Erlin-2_A0A3P9AX24	0.242272	0.291727	-0.0494555	0.0411374	0.00638639	0.594866
4-aminobutyrate aminotransferase_A0A3P9AX69;A0A3P9AX35	0.291839	0.387112	-0.0952723	0.0775874	0.0650839	0.57095
Reticulocalbin-1_A0A3P9AX37	0.27085	0.147104	0.123746	0.277429	0.527615	0.363747
Apolipoprotein H_A0A3P9AX72	0.815877	0.622654	0.193222	0.0216532	0.0537015	0.444803
ATP synthase subunit alpha_A0A3P9AX73	0.0926923	0.132711	-0.0400183	0.241428	0.0587685	0.6183
Myosin regulatory light chain 2, smooth muscle minor isoform_A0A3P9AX75	-0.0974806	-0.11032	0.0128393	0.325739	0.215304	0.858752
Nucleolysin TIA-1_A0A3P9AX84;A0A3P9BDA8;A0A3P9AX78	-0.174196	-0.150283	-0.023913	0.159929	0.11376	0.787278
Cell division control protein 42 homolog_A0A3P9CNU8;A0A3P9DLV7;A0A3P9AX87;A0A3P9BKI1	-0.186662	-0.0619789	-0.124683	0.00218207	0.0709121	0.00373589
Charged multivesicular body protein 5_A0A3P9AXA7	0.426485	0.466261	-0.0397762	0.0721152	0.0100061	0.788199
60S ribosomal protein L27_A0A3P9AXC4	-0.127866	-0.13552	0.00765441	0.20543	0.10684	0.938382
Eukaryotic translation initiation factor 3 subunit J_A0A3P9AXE6	0.0472888	-0.0640839	0.111373	0.471075	0.419261	0.0899416
Protein kinase C_A0A3P9AY73;A0A3P9AXE9	0.0132693	0.071173	-0.0579037	0.92505	0.588096	0.731549
Eukaryotic translation initiation factor 2A_A0A3P9AXB8;A0A3P9AXG9	0.0848607	0.0721757	0.0126851	0.0462159	0.0441834	0.484471
Serine/threonine-protein phosphatase_A0A3P9AXM0;A0A3P9C2K8;A0A3P9BPD8	-0.200124	-0.0667131	-0.13341	0.00791554	0.116473	0.0365343
Fibronectin_A0A3P9AXM3	0.568558	0.40712	0.161438	0.203937	0.243322	0.552287
Creatine kinase_A0A3P9AXN3	0.381455	0.440997	-0.0595429	0.0870358	0.00582821	0.707223
Eukaryotic translation initiation factor 1b_A0A3P9AXR0	0.100942	0.0769309	0.0240113	0.230159	0.217205	0.760815
Haptoglobin-like_A0A3P9AXY9;A0A3P9AXV8	0.817356	0.747065	0.0702908	0.0723377	0.142208	0.850037
Ribosomal protein S16_A0A3P9AXW0	-0.0906117	-0.114595	0.0239832	0.234155	0.0521422	0.744862
Plakophilin 3_A0A3P9AXW7	-0.289489	-0.297145	0.00765627	0.00976223	0.0391515	0.945324
Protein-arginine deiminase_A0A3P9AYK3;A0A3P9AXX5	-0.168984	-0.174192	0.00520854	0.182816	0.124631	0.942063
Apolipoprotein H_A0A3P9AXZ7	1.26188	1.09458	0.167297	0.00422284	0.000152201	0.270926
60S ribosomal protein L34_A0A3P9AY01;A0A3P9AY11	-0.153267	-0.1689	0.0156333	0.0349748	0.0271252	0.410086
ADP ribosylation factor like GTPase 6 interacting protein 1_A0A3P9AY56	0.00519308	-0.0303787	0.0355718	0.976223	0.814635	0.870708
Branched-chain-amino-acid aminotransferase_A0A3P9AY65	-0.433257	-0.374517	-0.0587398	0.00127032	0.00202762	0.356337
Solute carrier family 2, facilitated glucose transporter member 1_A0A3P9AY76;A0A3P9CJJ4;A0A3P9AYC7;A0A3P9CJ30	-0.052759	-0.0990782	0.0463191	0.659522	0.206286	0.698435
60S ribosomal protein L35a_A0A3P9AYD7;A0A3P9AYB6	-0.156902	-0.121799	-0.0351035	0.182185	0.0829898	0.775038
Eukaryotic translation initiation factor 5_A0A3P9AYD0;A0A3P9AYF0	-0.0926215	-0.0327703	-0.0598512	0.2246	0.582911	0.488951
Glyceraldehyde-3-phosphate dehydrogenase_A0A3P9AYF4	-0.0475007	0.13328	-0.18078	0.874044	0.600418	0.550174
Cytosolic 5'-nucleotidase 1A_A0A3P9AYG6	-0.104438	-0.023437	-0.0810014	0.0149084	0.698082	0.268847
Proteasome 26S subunit, non-ATPase 12_A0A3P9AYJ9;A0A3P9AY20	-0.0536828	-0.0527859	-0.000896813	0.100296	0.144311	0.967788
Platelet-activating factor acetylhydrolase IB subunit gamma_A0A3P9AYM6	0.0330825	0.0522271	-0.0191446	0.818039	0.701225	0.894261
Interferon induced protein 35_A0A3P9AYN1	0.337465	0.343053	-0.00558821	0.0067963	0.00893236	0.947745
Ribulose-phosphate 3-epimerase_A0A3P9AYP8	0.0205871	0.0504542	-0.0298671	0.843425	0.599723	0.811075
Fermitin family member 2_A0A3P9AYQ7;A0A3P9AYT1;A0A3P9AYQ8	0.331042	0.37864	-0.0475976	0.0449284	0.0325006	0.698558
Immunoglobulin superfamily member 3_A0A3P9AYR1	1.10626	0.676778	0.429478	0.00012194	0.0861547	0.0728277
Basic leucine zipper and W2 domain-containing protein 1-A_A0A3P9CG63;A0A3P9CGP3;A0A3P9AYT7	0.0233373	-0.0154152	0.0387525	0.704339	0.712526	0.543058
AP-2 complex subunit alpha_A0A3P9D811;A0A3P9AYZ9;A0A3P9AYV5	0.0618283	0.0647363	-0.00290799	0.17015	0.307241	0.949243
Galactosamine (N-acetyl)-6-sulfatase_A0A3P9AZ35;A0A3P9AYY3	0.0116137	-0.0105649	0.0221786	0.91511	0.895733	0.831871
Coagulation factor VII_A0A3P9AYZ5	0.458672	0.410132	0.0485399	0.00567555	0.0767174	0.749596
Aldehyde dehydrogenase (NAD(+))_A0A3P9AZ04	0.0810947	0.0943426	-0.0132479	0.315483	0.223971	0.820021
Catenin beta 1_A0A3P9AZ06;A0A3P9AZ50;A0A3P9BFT2;A0A3P9BFW6;A0A3P9BFN7	-0.235264	-0.312387	0.0771225	0.0825947	0.00865302	0.521923
Arginyl-tRNA synthetase_A0A3P9AZ07	0.258422	0.127106	0.131317	0.162568	0.0674687	0.426881
Ribosomal protein S10_A0A3P9AZ20	0.144965	0.0423911	0.102574	0.257638	0.724934	0.508829
Sorting nexin 12_A0A3P9AZ21	-0.0170924	0.0154868	-0.0325793	0.738507	0.774342	0.448199
Vacuolar protein sorting-associated protein 29_A0A3P9AZ27;A0A3P9AZ32	-0.169644	0.0296454	-0.19929	0.103188	0.592123	0.0560196
60S ribosomal protein L28_A0A3P9AZ48	-0.112851	-0.0898828	-0.0229685	0.273736	0.125175	0.788607
Tetraspanin_A0A3P9AZ77	0.316229	0.390599	-0.0743706	0.0304532	0.0311563	0.438377
Dynein light intermediate chain_A0A3P9AZA4;A0A3P9AZT5	0.00996638	0.0213948	-0.0114284	0.661571	0.567573	0.721141
PARP catalytic domain-containing protein_A0A3P9AZA6	0.131353	0.255028	-0.123675	0.418915	0.134997	0.13575
26S proteasome non-ATPase regulatory subunit 5_A0A3P9AZH1	0.0282622	0.101949	-0.0736871	0.548951	0.0927434	0.153835
Interleukin enhancer binding factor 3_A0A3P9AZP5;A0A3P9AZJ6	0.116937	0.015278	0.101659	0.322926	0.842387	0.454842
3'(2'), 5'-bisphosphate nucleotidase 1_A0A3P9AZJ9	-0.0619528	0.122876	-0.184829	0.526944	0.160996	0.0703844
Quinoid dihydropteridine reductase_A0A3P9AZK0	-0.580653	-0.677483	0.0968295	0.229558	0.177512	0.629038
CD2 associated protein_A0A3P9B075;A0A3P9AZL6	-0.0836934	-0.0173551	-0.0663383	0.415576	0.872135	0.298309
Cullin 9_A0A3P9AZZ3;A0A3P9AZU9	0.0297583	0.0917197	-0.0619614	0.300591	0.0303599	0.0248276
PHD finger protein rhinoceros_A0A3P9AZW1	0.168287	0.255551	-0.0872639	0.124586	0.00419974	0.358058
Phenylalanine--tRNA ligase_A0A3P9AZW5	-0.135683	-0.0616108	-0.0740725	0.115097	0.324875	0.135964
Serine/threonine-protein phosphatase 2A 55 kDa regulatory subunit B_A0A3P9D366;A0A3P9BPF4;A0A3P9AZX7;A0A3P9DS09;A0A3P9BQA4;A0A3P9B019;A0A3P9BXI5;A0A3P9CGN9;A0A3P9CFW9;A0A3P9CFE8;A0A3P9DQ69	-0.191094	-0.0615616	-0.129532	0.240682	0.389448	0.400892
Heterogeneous nuclear ribonucleoprotein M_A0A3P9AZZ5	-0.0678481	-0.0472963	-0.0205518	0.279507	0.247073	0.706058
Macrophage migration inhibitory factor_A0A3P9B017	-0.102765	-0.0255488	-0.0772159	0.446749	0.81676	0.385777
Integrin alpha-6_A0A3P9B048;A0A3P9B035	-0.165074	-0.321692	0.156618	0.0170185	0.00207332	0.0086553
Myotrophin_A0A3P9B057	0.316353	0.249324	0.0670295	0.0867694	0.131328	0.462772
Serine/threonine-protein phosphatase_A0A3P9BDH5;A0A3P9CSS9;A0A3P9B071;A0A3P9B8D6;A0A3P9D905;A0A3P9B0C3;A0A3P9DAQ6;A0A3P9CS14;A0A3P9DA07	-0.0092219	0.0200289	-0.0292508	0.917703	0.590266	0.724723
Si:ch211-76l23.4_A0A3P9B092	0.615433	0.539558	0.0758749	0.167889	0.218976	0.852856
Adipocyte plasma membrane-associated protein_A0A3P9B0B2	0.115844	0.155448	-0.0396036	0.218221	0.0446438	0.609675
Progesterone receptor membrane component 2_A0A3P9B0F9;A0A3P9B0B4	0.0839868	0.0987261	-0.0147393	0.238828	0.0405657	0.789637
BTB/POZ domain-containing protein KCTD12_A0A3P9B0F7	0.0229007	0.0441566	-0.0212559	0.73303	0.422649	0.615248
Small monomeric GTPase_A0A3P9CTG4;A0A3P9B0G0;A0A3P9C113	-0.0461353	0.00900948	-0.0551448	0.535849	0.880468	0.404856
Calcium-binding mitochondrial carrier protein Aralar1_A0A3P9B0G1;A0A3P9B0H3	0.0668632	0.0756489	-0.00878574	0.025425	0.0458078	0.771447
Sialic acid synthase_A0A3P9B150;A0A3P9B0I3	-0.322745	-0.184937	-0.137807	0.0106686	0.0379918	0.0558896
Catenin delta 1_A0A3P9B191;A0A3P9B1A5;A0A3P9B0Q6;A0A3P9B0L4	-0.0296146	-0.0427494	0.0131348	0.456826	0.32483	0.504835
Cytochrome c oxidase subunit 7A-related protein, mitochondrial_A0A3P9B0L5	-0.0333932	0.0425857	-0.0759789	0.48561	0.412642	0.10437
Phosphate cytidylyltransferase 1, choline, alpha_A0A3P9B0Q3	-0.123567	-0.116772	-0.00679525	0.0989288	0.0250194	0.909674
AP-2 complex subunit mu_A0A3P9B0S0	-0.0338915	-0.0660441	0.0321526	0.648461	0.311657	0.665747
Hydroxyacylglutathione hydrolase_A0A3P9B0U7	0.201124	0.28264	-0.0815161	0.116674	0.0143054	0.429228
Guanine nucleotide-binding protein G(i) subunit alpha-1_A0A3P9B0U8	0.0664787	0.0734604	-0.00698174	0.412747	0.159525	0.9104
Pyruvate carboxylase_A0A3P9B0W7	-0.00513821	0.00430784	-0.00944605	0.959874	0.947996	0.931077
Serine/threonine-protein phosphatase_A0A3P9BNJ8;A0A3P9B0W8;A0A3P9BNH5;A0A3P9B0C2	-0.154482	-0.0858567	-0.068625	0.0341468	0.142982	0.369136
Leucyl-tRNA synthetase_A0A3P9B1C5;A0A3P9B0Y7	-0.0874884	-0.0960596	0.00857128	0.151911	0.0624192	0.864552
PH domain-containing protein_A0A3P9B118	0.373545	0.672076	-0.29853	0.0586325	0.000949029	0.0463173
Protein-serine/threonine phosphatase_A0A3P9B1C2;A0A3P9B160	-0.0730632	-0.0339661	-0.0390971	0.507875	0.632684	0.741426
Cholesteryl ester transfer protein_A0A3P9B162	-0.115482	-0.266134	0.150652	0.638988	0.133724	0.628542
Nitrilase family member 2_A0A3P9B171	0.11885	0.221899	-0.10305	0.457198	0.109477	0.508578
Sulfotransferase_A0A3P9B181	-0.112737	0.0661885	-0.178925	0.0227592	0.0827315	0.00601641
Spectrin beta chain, non-erythrocytic 1_A0A3P9CE32;A0A3P9B1C0	0.386408	0.60736	-0.220952	0.0252862	0.00144749	0.0638387
ATP synthase subunit d, mitochondrial_A0A3P9B1C6	-0.0318103	0.000270093	-0.0320804	0.723316	0.996296	0.699021
RNA helicase_A0A3P9B1C7;A0A3P9DD80;A0A3P9B1D5	-0.139064	-0.0739146	-0.0651492	0.031456	0.14152	0.0143681
Major vault protein_A0A3P9B1E5	0.0553642	0.229573	-0.174209	0.151894	2.25116e-05	0.002916
Coatomer subunit beta'_A0A3P9B1C9;A0A3P9B1E9	0.068831	0.0479194	0.0209116	0.247125	0.405104	0.275827
Thioredoxin 2_A0A3P9B1G5	0.0983194	0.103668	-0.00534857	0.137576	0.242281	0.94975
Ig-like domain-containing protein_A0A3P9B1M9	-0.213939	-0.137019	-0.0769195	0.0858451	0.246519	0.322813
Plakophilin-1_A0A3P9B1N2	-0.444905	-0.435255	-0.00964958	0.0406768	0.046352	0.972198
Solute carrier family 3 member 2_A0A3P9B1P7	-0.177649	-0.230751	0.0531027	0.315876	0.107362	0.768199
Leucine-rich repeat protein SHOC-2_A0A3P9B1Q7;A0A3P9B282	0.126896	0.213517	-0.0866209	0.08867	0.0436918	0.365735
Non-specific serine/threonine protein kinase_A0A3P9B1S0;A0A3P9B1X3	-0.172867	-0.137953	-0.0349143	0.115607	0.0961649	0.695964
Proteasome assembly chaperone 2_A0A3P9B1T3;A0A3P9B1U2	-0.0484759	-0.0861396	0.0376637	0.54248	0.206494	0.63282
Rho GTPase-activating protein 17_A0A3P9BJC3;A0A3P9B1U1;A0A3P9BJB5;A0A3P9BJF3;A0A3P9B1X0	0.233274	0.234461	-0.0011874	0.107353	0.0322968	0.989929
Complement factor D_A0A3P9B1V0	1.07353	0.902168	0.171361	0.00100146	0.0001184	0.0874249
Myosin heavy chain 9_A0A3P9B1V8	0.0230218	0.0680029	-0.0449812	0.050494	0.0098518	0.0526323
Nucleoplasmin domain-containing protein_A0A3P9B1W3;A0A3P9B1X1	-0.0752926	0.0226473	-0.0979399	0.528987	0.8069	0.439382
Glutamate dehydrogenase (NAD(P)(+))_A0A3P9B1W6	0.0785724	0.211475	-0.132903	0.373698	0.0236383	0.0703712
Coproporphyrinogen oxidase_A0A3P9B221	0.0449789	0.161877	-0.116898	0.519586	0.0531419	0.0615348
GCN1 activator of EIF2AK4_A0A3P9B228	-0.0048551	-0.0325489	0.0276938	0.964111	0.52862	0.806914
60S ribosomal protein L12_A0A3P9B2A9	-0.160537	-0.132943	-0.0275937	0.0752029	0.0311974	0.734379
Uncharacterized LOC101487006_A0A3P9B2B2	0.194054	0.232342	-0.0382875	0.285332	0.225227	0.793145
Structural maintenance of chromosomes protein_A0A3P9B2B3	0.109943	0.078654	0.031289	0.0556449	0.0904034	0.471707
FACT complex subunit SSRP1_A0A3P9B2C0;A0A3P9B2D7	0.132499	0.0414096	0.0910892	0.00704307	0.514457	0.188019
Protein farnesyltransferase subunit beta_A0A3P9B2C7	-0.0422396	-0.0685967	0.0263571	0.692712	0.565194	0.845446
40S ribosomal protein SA_A0A3P9B2G0;A0A3P9B2W7	-0.204146	-0.162633	-0.0415133	0.0101238	0.013076	0.2868
Gamma-adducin_A0A3P9B2Q0;A0A3P9B2L2;A0A3P9B2M5	0.456519	0.674047	-0.217528	0.00277746	4.00281e-05	0.0128698
60S acidic ribosomal protein P2_A0A3P9B2P0	0.422759	0.0660503	0.356709	0.0720755	0.716215	0.0622062
60S ribosomal protein L7a_A0A3P9B2Q9	-0.0932747	-0.104392	0.0111175	0.343748	0.143122	0.890933
Coatomer subunit epsilon_A0A3P9B2S1;A0A3P9B2S8	0.0303946	0.0170335	0.0133611	0.506439	0.56098	0.748797
Multiple EGF like domains 8_A0A3P9B2T2	0.893777	0.812105	0.0816724	0.0076831	0.0204519	0.681575
SEC24 homolog C, COPII coat complex component_A0A3P9B2Y1;A0A3P9B2W0;A0A3P9B3E8	0.259909	0.202904	0.0570051	0.0720387	0.00385043	0.603655
Ribose-5-phosphate isomerase_A0A3P9B2X5	0.105334	0.0673515	0.0379829	0.517224	0.683795	0.642846
Septin_A0A3P9BKV6;A0A3P9B2Z3;A0A3P9B2X7	0.0551595	0.0442554	0.0109041	0.547017	0.644786	0.894843
Periplakin_A0A3P9B2X9	-0.284004	-0.0449455	-0.239058	0.00501615	0.585783	0.0432832
Complex I-23kD_A0A3P9CDL2;A0A3P9CD40;A0A3P9B2Z5;A0A3P9B316	-0.00986647	0.0824276	-0.0922941	0.919647	0.335242	0.453066
Myeloid derived growth factor_A0A3P9B310	-0.0815566	-0.0300993	-0.0514573	0.400037	0.733074	0.153075
Signal transducer and activator of transcription_A0A3P9B3H9;A0A3P9B320	-0.0564582	-0.0629276	0.00646938	0.454725	0.0889078	0.93051
Heterogeneous nuclear ribonucleoprotein U_A0A3P9B2P7;A0A3P9B322	-0.0910035	-0.0849215	-0.00608194	0.0731344	0.132164	0.857724
Ubiquitin-conjugating enzyme E2 D4_A0A3P9DQS5;A0A3P9B333;A0A3P9B327	-0.105215	-0.0544121	-0.0508032	0.0291265	0.335716	0.308714
60S ribosomal protein L30_A0A3P9B341;A0A3P9B331	-0.193893	-0.152994	-0.0408994	0.00178105	0.00840745	0.195665
Nicalin_A0A3P9B349;A0A3P9B332	0.0183051	0.022898	-0.00459289	0.750504	0.586071	0.946771
Rho guanine nucleotide exchange factor 1_A0A3P9B3D5;A0A3P9B339	0.0544691	0.0884762	-0.034007	0.0955789	0.00830543	0.22154
VIP36-like protein_A0A3P9B393;A0A3P9B3J9;A0A3P9B369	0.192866	0.143194	0.049672	0.00932725	0.106067	0.375856
Dynein cytoplasmic 1 heavy chain 1_A0A3P9B372	0.10483	0.0929486	0.0118818	0.0280973	0.00449805	0.674876
Putative hydroxypyruvate isomerase_A0A3P9B396	0.144588	0.220272	-0.0756843	0.273531	0.0426724	0.45705
Peptidyl-prolyl cis-trans isomerase_A0A3P9C5V6;A0A3P9B3A2;A0A3P9C5D9	-0.0661262	-0.0236261	-0.0425001	0.577629	0.659233	0.738135
2-iminobutanoate/2-iminopropanoate deaminase_A0A3P9B3B6;A0A3P9B3D1	-0.0991521	-0.0113239	-0.0878282	0.366723	0.908947	0.0768921
GTP-binding nuclear protein Ran_A0A3P9B3D9	-0.0942006	-0.048851	-0.0453496	0.101807	0.244288	0.200008
Nuclear transport factor 2_A0A3P9B3F5	-0.0123675	-0.0307881	0.0184206	0.818139	0.634185	0.813762
Calcium/calmodulin-dependent protein kinase_A0A3P9B3L8;A0A3P9B3I1;A0A3P9DPJ7;A0A3P9DQF6;A0A3P9DR18;A0A3P9B3H0;A0A3P9DQZ3;A0A3P9B3Q8;A0A3P9B3P1;A0A3P9B3G9;A0A3P9DRD3	0.228912	0.0861777	0.142735	0.413855	0.624628	0.62819
ST13 Hsp70 interacting protein_A0A3P9B3J2;A0A3P9B3K0	0.0596937	0.167576	-0.107882	0.584067	0.0358467	0.355825
Nuclear cap-binding protein subunit 1-like_A0A3P9BRX1;A0A3P9B3M2	-0.134962	-0.0586642	-0.0762978	0.224702	0.219888	0.452725
Ran GTPase-activating protein 1_A0A3P9B3Q1	0.209412	0.122167	0.0872454	0.0164514	0.0361604	0.205911
26S proteasome non-ATPase regulatory subunit 2_A0A3P9B3T3;A0A3P9B451	0.0129768	-0.0204663	0.0334432	0.646942	0.393903	0.189114
Annexin_A0A3P9B3W0	0.308378	0.190628	0.11775	0.0799301	0.297122	0.396369
RNA helicase_A0A3P9B3X4;A0A3P9DDC0;A0A3P9DDY0;A0A3P9DL68	-0.215623	-0.158969	-0.0566533	0.00862198	0.0247929	0.0489543
Rho-related GTP-binding protein RhoA-D_A0A3P9BUC5;A0A3P9DNJ9;A0A3P9BHB6;A0A3P9BGZ1;A0A3P9B415;A0A3P9D1V6;A0A3P9C0V5;A0A3P9C118	-0.099074	0.0285329	-0.127607	0.474528	0.732717	0.417218
X-prolyl aminopeptidase 1_A0A3P9B488;A0A3P9B4S3;A0A3P9B479;A0A3P9B4B7	0.0320218	0.0752759	-0.0432541	0.76789	0.493189	0.501672
F-actin-capping protein subunit alpha_A0A3P9B494	-0.056421	0.0244372	-0.0808582	0.40219	0.416102	0.221802
Gamma-interferon-inducible lysosomal thiol reductase_A0A3P9B4D1	0.0400672	0.00942906	0.0306382	0.826201	0.958128	0.843834
Apolipoprotein A-I_A0A3P9B4D6	1.93462	1.60985	0.324773	0.0834572	0.0140272	0.524068
Apolipoprotein Eb_A0A3P9B4F2	0.27073	0.117786	0.152943	0.330045	0.721621	0.678346
Apolipoprotein C-I_A0A3P9B4G7	1.67954	1.18418	0.49536	0.0733063	0.0667298	0.353833
AHNAK nucleoprotein_A0A3P9B4H0	-0.026329	-0.033043	0.00671394	0.215968	0.492747	0.889636
Apolipoprotein A-II_A0A3P9B4I0	0.973857	0.860043	0.113814	0.00192954	0.0055291	0.389923
Ras-related C3 botulinum toxin substrate 1_A0A3P9BPJ8;A0A3P9CUH1;A0A3P9D6X5;A0A3P9B4I6;A0A3P9DDU6;A0A3P9CTH9;A0A3P9B4M9;A0A3P9BD87	-0.0534665	0.0882391	-0.141706	0.478054	0.0728076	0.112487
Eukaryotic translation elongation factor 1 gamma_A0A3P9B4J7	-0.124906	-0.100285	-0.0246209	0.0321975	0.0518364	0.475316
Tumor protein D52_A0A3P9B4Q1	-0.0679799	-0.0897934	0.0218135	0.411811	0.182842	0.795269
Elongation factor 1-beta_A0A3P9B4U4;A0A3P9B4Q6	-0.119594	-0.17215	0.0525551	0.045061	0.00781875	0.274453
Cytochrome b-c1 complex subunit 2, mitochondrial_A0A3P9B4T4	-0.114941	-0.019633	-0.0953078	0.078415	0.703714	0.144788
40S ribosomal protein S19_A0A3P9B4V3	-0.127417	-0.139965	0.0125476	0.134107	0.0454835	0.888298
Core histone macro-H2A_A0A3P9B541	0.39366	0.43968	-0.0460194	0.0606611	0.0483162	0.792212
Putative short-chain dehydrogenase/reductase family 42E member 2_A0A3P9B560;A0A3P9B5F7	2.02107	1.93014	0.0909278	0.0101707	0.0537781	0.812849
40S ribosomal protein S15_A0A3P9B565	-0.0141894	-0.105454	0.0912648	0.800341	0.095185	0.0677121
Calponin_A0A3P9CC81;A0A3P9B5G4;A0A3P9B587;A0A3P9CC91	0.0401779	0.073191	-0.033013	0.634764	0.154832	0.712011
Phosphatidylinositol transfer protein alpha isoform_A0A3P9B5A2	-0.419493	-0.200129	-0.219364	0.0015493	0.0525851	0.0350147
Sulfhydryl oxidase_A0A3P9B5B7	0.654708	0.520683	0.134025	0.0142315	0.0748434	0.501804
Enoyl-CoA hydratase, short chain 1_A0A3P9B5E5	0.0668069	0.206384	-0.139577	0.552156	0.0425849	0.189746
Dipeptidyl peptidase 9_A0A3P9B5G0	0.169712	0.0868041	0.0829078	0.245925	0.309778	0.537228
Calponin_A0A3P9B5G4	0.0480577	0.0789474	-0.0308897	0.13315	0.0899261	0.323858
40S ribosomal protein S28_A0A3P9B5H5	-0.226257	-0.20918	-0.0170766	0.0262822	0.00535149	0.846299
Venom prothrombin activator porpharin-D_A0A3P9B5M1	0.828088	0.783651	0.0444376	0.000614382	0.00420553	0.68803
Caveolae-associated protein 2_A0A3P9B5M5	0.197887	0.310727	-0.11284	0.215788	0.0117244	0.399974
Calnexin_A0A3P9B5P8	0.0536695	0.0462446	0.00742497	0.182359	0.356194	0.884872
Tripartite motif-containing protein 16-like_A0A3P9B5S9	-0.0467073	-0.00390357	-0.0428037	0.50994	0.918504	0.534493
Apoptosis inducing factor mitochondria associated 2_A0A3P9B5T1	0.440663	0.49295	-0.0522874	0.030974	0.0254387	0.742636
Sad1 and UNC84 domain containing 1_A0A3P9B5U8;A0A3P9B679;A0A3P9B635;A0A3P9B5V8	0.381594	0.362406	0.0191881	0.000197238	0.0769226	0.888966
T-complex protein 1 subunit eta_A0A3P9B5N8;A0A3P9B5X0	-0.0651133	-0.0612477	-0.00386558	0.495324	0.287869	0.966245
Myosin IC_A0A3P9B5X3;A0A3P9B686	0.193966	0.140536	0.0534303	0.0120842	0.0958286	0.305694
Erlin-1_A0A3P9B5X4	0.0497004	0.140201	-0.0905004	0.565702	0.133894	0.364114
Basement membrane-specific heparan sulfate proteoglycan core protein-like_A0A3P9B5Z2	1.09578	0.961544	0.134237	0.003085	0.000401135	0.287734
14-3-3 protein epsilon_A0A3P9B633;A0A3P9B630	-0.387128	-0.245205	-0.141923	0.0144041	0.0356282	0.211908
Keratin, type I cytoskeletal 13_A0A3P9B638;A0A3P9B5Y2;A0A3P9B634	0.00234791	-0.456745	0.459093	0.992887	0.0272198	0.202632
Adapter molecule crk_A0A3P9B662	-0.0554398	0.104101	-0.159541	0.67949	0.338929	0.114869
Extended synaptotagmin-2-A_A0A3P9B692;A0A3P9B6C1;A0A3P9B6L1	0.0714752	0.0795541	-0.00807884	0.398965	0.232109	0.923636
Metavinculin_A0A3P9B6C3;A0A3P9B696	0.491245	0.349133	0.142111	0.012369	0.0342467	0.0672511
Kinesin-like protein_A0A3P9B6C8;A0A3P9BA58	-0.0405087	0.0157244	-0.0562331	0.373306	0.510791	0.238671
Transmembrane p24 trafficking protein 9_A0A3P9B6F6;A0A3P9CF18	0.0873927	0.0445666	0.0428261	0.171007	0.126757	0.481197
Clusterin_A0A3P9B6H4	0.776258	0.590731	0.185527	0.000548271	0.023905	0.204706
Collagen alpha-1(XI) chain_A0A3P9B6K9	0.604806	0.606057	-0.00125064	0.0117522	0.0228108	0.99342
Oxysterol-binding protein_A0A3P9B6Z1;A0A3P9B6U0;A0A3P9B6L4;A0A3P9B6R1	-0.0931796	-0.0333264	-0.0598532	0.199567	0.613571	0.504318
Adenosine kinase_A0A3P9B6X6;A0A3P9B6N2;A0A3P9B6L5	-0.143584	-0.0560337	-0.0875507	0.0332826	0.317087	0.0452846
Cytochrome b-c1 complex subunit 7_A0A3P9B6M9	-0.0870168	-0.0608313	-0.0261855	0.350391	0.451894	0.784533
Uncharacterized protein_A0A3P9B6N1	0.267731	0.271233	-0.00350246	0.166696	0.28526	0.986935
Tapasin-related protein_A0A3P9B6P2	0.174021	0.257024	-0.0830033	0.114686	0.0506269	0.488153
75 kDa glucose-regulated protein_A0A3P9B6P7	0.000121727	-0.0115388	0.0116605	0.999091	0.88675	0.914822
Glutamate dehydrogenase (NAD(P)(+))_A0A3P9B6Q3;A0A3P9B6P1	-0.227251	-0.092563	-0.134688	0.000385862	0.304305	0.197313
EH domain-containing protein 1_A0A3P9B6Q7	0.154239	0.147754	0.00648536	0.0112276	0.00315359	0.84949
Guanine nucleotide-binding protein G(I)/G(S)/G(O) subunit gamma-12_A0A3P9B6U6	-0.099068	-0.0325915	-0.0664765	0.244882	0.593055	0.408912
ABRA C-terminal-like protein_A0A3P9B6V0	-0.544683	-0.631031	0.0863475	0.0156027	0.00895828	0.617434
Interferon-induced GTP-binding protein Mx_A0A3P9B6V1	0.287073	0.234242	0.0528303	0.0325288	0.0495377	0.550224
DnaJ heat shock protein family (Hsp40) member A2_A0A3P9B6Y8	0.0619493	-0.0027793	0.0647286	0.624099	0.974688	0.663011
TNF receptor associated protein 1_A0A3P9B6Y9	-0.058626	-0.047802	-0.010824	0.718689	0.558324	0.951566
UBX domain protein 1_A0A3P9B709	0.115266	0.0954816	0.0197842	0.0451393	0.0159267	0.58572
Diazepam binding inhibitor, acyl-CoA binding protein_A0A3P9B753;A0A3P9B7C8;A0A3P9B720	-0.131249	-0.362626	0.231377	0.510401	0.167858	0.283716
Gamma-synuclein_A0A3P9B735;A0A3P9B727	-0.0208794	-0.115715	0.0948359	0.92376	0.483594	0.733937
Calreticulin_A0A3P9B7A6;A0A3P9B732	-0.131144	-0.127382	-0.00376174	0.295432	0.153913	0.973171
Ribosomal protein_A0A3P9BA29;A0A3P9B741	-0.0974352	-0.0776114	-0.0198238	0.0343649	0.0510856	0.404065
Ubiquitin conjugating enzyme E2 M_A0A3P9B7B3;A0A3P9B748	-0.0437551	0.00716937	-0.0509245	0.0604311	0.752358	0.130893
Glucosidase II alpha subunit_A0A3P9B7H3;A0A3P9B7A4;A0A3P9B773;A0A3P9B7I6	0.035796	0.0219669	0.0138291	0.526085	0.579282	0.792736
Guanine nucleotide-binding protein G(q) subunit alpha_A0A3P9B776	0.0164652	0.142086	-0.125621	0.881776	0.0925734	0.275217
Ribosomal protein S6 kinase 2 alpha_A0A3P9BH03;A0A3P9B778;A0A3P9BHA7;A0A3P9CZ84;A0A3P9C0M6	-0.0845077	-0.00749431	-0.0770134	0.153944	0.85089	0.106794
Glutathione S-transferase_A0A3P9B790	-0.00339612	0.129232	-0.132628	0.983811	0.299032	0.347894
Actin-depolymerizing factor_A0A3P9B798	-0.0585748	0.041231	-0.0998058	0.52745	0.460451	0.348539
Leucine rich repeat containing 59_A0A3P9B7D0;A0A3P9B7B4	0.0643288	0.0153517	0.0489771	0.627198	0.831448	0.689531
Dynactin subunit 1_A0A3P9B7B7	0.09171	0.176354	-0.0846437	0.0751991	0.00721567	0.0321963
Sulfide quinone oxidoreductase_A0A3P9B7C1	-0.363488	-0.239831	-0.123657	0.00152351	0.00693513	0.0221207
Glutathione S-transferase_A0A3P9B7B9;A0A3P9B7C9	-0.406859	-0.083915	-0.322944	0.499016	0.868042	0.0455641
Antioxidant 1 copper chaperone_A0A3P9B7D9	-0.0798898	-0.223151	0.143262	0.424498	0.0939343	0.0830696
40S ribosomal protein S27a_A0A3P9AWB0;A0A3P9CIY7;A0A3P9B7H8;A0A3P9B7A9	0.18334	0.13935	0.0439898	0.132732	0.0655414	0.643706
Sec1 family domain containing 1_A0A3P9B7I8	0.0205485	0.00656866	0.0139798	0.856201	0.933181	0.900436
Complex I-B18_A0A3P9B7K0	0.0823398	0.231287	-0.148947	0.707161	0.265453	0.194366
EH domain-containing protein 4_A0A3P9DDM6;A0A3P9DD20;A0A3P9B7L2	0.14446	0.158564	-0.0141047	0.127759	0.0492335	0.856742
Beta-hexosaminidase_A0A3P9B7N1;A0A3P9B7L5	0.158782	0.181695	-0.0229125	0.0904482	0.0174907	0.759947
Family with sequence similarity 83 member H_A0A3P9B7M9	-0.0405398	-0.10137	0.0608307	0.337544	0.00683509	0.147328
Phenylalanyl-tRNA synthetase beta subunit_A0A3P9B7P0	-0.164364	-0.156225	-0.00813927	0.0117649	0.0106746	0.665864
60S ribosomal protein L5_A0A3P9B7T0;A0A3P9B7R5	0.0268663	0.0312786	-0.00441224	0.514697	0.489901	0.921139
Pitrilysin metalloproteinase 1_A0A3P9B7Z1;A0A3P9B7R8	-0.0468164	-0.133098	0.0862819	0.551726	0.11068	0.109462
Heterogeneous nuclear ribonucleoprotein K_A0A3P9B7U2;A0A3P9B7S3	-0.171369	-0.151711	-0.0196578	0.0470514	0.143134	0.85683
cAMP-dependent protein kinase_A0A3P9DGJ8;A0A3P9BV26;A0A3P9B7S4;A0A3P9BVW2;A0A3P9BV17;A0A3P9BV12	0.0294189	0.0231096	0.0063093	0.681246	0.756682	0.811994
Alkylglycerone-phosphate synthase_A0A3P9B7S8	-0.254245	-0.227521	-0.0267239	0.192316	0.216937	0.857214
Mono-ADP ribosylhydrolase 1_A0A3P9B7T8	0.115044	0.154868	-0.0398236	0.473558	0.0780714	0.76381
Karyopherin subunit beta 1_A0A3P9B7U6;A0A3P9B7Z3	-0.0887556	-0.0471828	-0.0415728	0.0404457	0.354827	0.467258
Envoplakin_A0A3P9B818	-0.233411	-0.163388	-0.0700236	0.00665634	0.0223745	0.242858
Transcription factor BTF3_A0A3P9B821	0.024261	0.0480623	-0.0238013	0.83625	0.549784	0.835373
PrdX deacylase domain-containing protein 1_A0A3P9CZH3;A0A3P9B838;A0A3P9CYS2	-0.141357	-0.1349	-0.00645689	0.121609	0.0554953	0.939581
Coronin_A0A3P9B843	-0.101798	0.0272439	-0.129042	0.159551	0.585394	0.0655432
Small nuclear ribonucleoprotein Sm D1_A0A3P9B857	-0.204482	-0.129637	-0.0748444	0.0920329	0.28714	0.408805
Lipocalin-like_A0A3P9BWS8;A0A3P9B861;A0A3P9BW93	0.549688	0.52853	0.021158	0.475377	0.537492	0.980316
Complement C3_A0A3P9B866	1.22879	0.959285	0.269504	0.0397932	0.0178802	0.417923
Uncharacterized LOC112431949_A0A3P9B872;A0A3P9CDH2	0.195788	0.219652	-0.0238643	0.0611514	0.0374702	0.702769
Apolipoprotein B_A0A3P9B896	1.01912	0.823618	0.195498	0.122271	0.0291975	0.630778
Properdin_A0A3P9B8L2;A0A3P9B8A5	0.103956	-0.0775537	0.18151	0.719424	0.693175	0.570942
T1-TrpRS_A0A3P9B8A6	-0.0609862	-0.0140464	-0.0469398	0.458985	0.78878	0.607281
Hydroxyacyl-CoA dehydrogenase trifunctional multienzyme complex subunit beta_A0A3P9B8B5	-0.025659	-0.00638225	-0.0192768	0.467322	0.901132	0.718086
Peptidylprolyl isomerase_A0A3P9B8C0	-0.0851308	-0.0654638	-0.019667	0.189166	0.211062	0.718977
D-glutamate cyclase_A0A3P9B8C1;A0A3P9B8F7	-0.0358188	0.0421892	-0.078008	0.767321	0.535455	0.466185
Heme oxygenase (biliverdin-producing)_A0A3P9B8E8;A0A3P9B8E0	0.0965784	0.0408225	0.0557558	0.318097	0.417888	0.545145
Myosin-10_A0A3P9B1V8;A0A3P9ATQ9;A0A3P9ATW3;A0A3P9B8E5	0.0653061	0.0751524	-0.00984632	0.232111	0.146128	0.863222
Guanine nucleotide-binding protein subunit alpha-13_A0A3P9B8F9	-0.0912996	-0.00848311	-0.0828165	0.13876	0.770531	0.156028
Caspase-3_A0A3P9B8I1	0.00616911	0.137992	-0.131823	0.942976	0.235137	0.107434
Retinol dehydrogenase 13_A0A3P9B8I7;A0A3P9D520;A0A3P9CSS6;A0A3P9BY28	0.0300423	0.0349032	-0.00486088	0.782705	0.787205	0.975411
Proteasome 26S subunit, non-ATPase 3_A0A3P9B8M5;A0A3P9B8N0	-0.0211418	-0.00335721	-0.0177846	0.71011	0.863308	0.738815
Angiopoietin like 7_A0A3P9B8R5	0.253829	0.498204	-0.244375	0.247776	0.0615105	0.197225
Transmembrane emp24 domain-containing protein 7_A0A3P9B8W2	-0.149046	0.00643066	-0.155476	0.0569034	0.902877	0.0848286
Tumor protein 63 (p63)_A0A3P9BN43;A0A3P9B8X7;A0A3P9B2S3;A0A3P9BN25	-0.124184	-0.277111	0.152927	0.00647911	0.00289508	0.0257982
Lactoylglutathione lyase_A0A3P9B8Z5	-0.24806	-0.102	-0.14606	0.0382143	0.226707	0.0860899
Secreted frizzled-related protein 1_A0A3P9B951;A0A3P9B946	0.560239	0.543011	0.0172286	0.0434096	0.0703064	0.937367
Tyrosine-protein kinase_A0A3P9B962;A0A3P9B950	0.0522756	-0.00977327	0.0620488	0.528065	0.840956	0.43535
Glutamyl-tRNA synthetase_A0A3P9B956	-0.0577872	-0.0697756	0.0119884	0.335914	0.223998	0.792331
60S ribosomal protein L13a_A0A3P9B930;A0A3P9B987	-0.152315	-0.151666	-0.000649813	0.140207	0.105494	0.994642
Multifunctional methyltransferase subunit TRM112-like protein_A0A3P9B990	0.048115	0.128726	-0.0806112	0.484438	0.0197557	0.255378
CAAX prenyl protease_A0A3P9B9E9;A0A3P9B9A3	-0.0259051	-0.0617239	0.0358188	0.537621	0.0964666	0.274137
RAB10, member RAS oncogene family_A0A3P9B9E2	0.121166	-0.00277471	0.123941	0.0970873	0.912036	0.104486
Septin_A0A3P9B9F3;A0A3P9B9F1	0.101227	0.111767	-0.0105399	0.317741	0.349714	0.924985
Cytoskeleton associated protein 4_A0A3P9B9J7	0.167133	0.070054	0.0970791	0.447115	0.765309	0.265555
Serine/threonine kinase 25_A0A3P9B9K2;A0A3P9AR86;A0A3P9B6I2;A0A3P9B9K7;A0A3P9B6H5	0.0204708	-0.0394796	0.0599504	0.817963	0.516058	0.418905
60S ribosomal protein L38_A0A3P9B9K9	-0.0915356	-0.143981	0.0524459	0.359887	0.140884	0.656317
Plastin-3_A0A3P9B9M3	0.017517	-0.0132959	0.0308129	0.904865	0.894142	0.782778
Proteasome subunit alpha type_A0A3P9B9W1;A0A3P9B9P4	-0.0107308	0.0676303	-0.0783611	0.931947	0.570929	0.585954
Transcription factor AP-2 gamma_A0A3P9CM87;A0A3P9CMV7;A0A3P9B8N9;A0A3P9DM18;A0A3P9B8S5;A0A3P9B9Q9;A0A3P9B9Q5;A0A3P9B9U9;A0A3P9CLE4	0.13665	-0.00857283	0.145223	0.158464	0.906977	0.213955
Heat shock cognate 71 kDa protein_A0A3P9B9R0	0.471337	0.571282	-0.0999451	0.106482	0.0388898	0.601652
Acyl-CoA dehydrogenase family member 8_A0A3P9B9U5	0.0442833	0.0592689	-0.0149857	0.25338	0.0956046	0.698277
T-complex protein 1 subunit delta_A0A3P9BA19	-0.02639	-0.0439815	0.0175915	0.798266	0.313369	0.872815
Complement component C9_A0A3P9BAB6	1.49125	1.33325	0.158	0.00237318	0.0208427	0.490442
Vacuolar proton pump subunit B_A0A3P9BAC9	0.119612	0.0666653	0.0529463	0.166284	0.207293	0.455077
DAB adaptor protein 2_A0A3P9BAE6;A0A3P9BAE5	0.154816	0.0225513	0.132264	0.47879	0.864442	0.577011
Cofilin 1_A0A3P9BAI9	0.0858406	0.187641	-0.1018	0.429672	0.075787	0.140378
Ras-related protein Rab-25_A0A3P9CM40;A0A3P9BAJ0;A0A3P9CM58	-0.229067	-0.107885	-0.121182	0.0352184	0.222085	0.161965
Atlastin-3_A0A3P9BAK3	-0.000790808	-0.0133209	0.0125301	0.989078	0.789922	0.753606
Reticulon_A0A3P9BAK6;A0A3P9BAM8	-0.103076	-0.0326935	-0.0703829	0.0949302	0.517229	0.0117312
SCY1 like pseudokinase 2_A0A3P9BAM5	-0.0834674	-0.113441	0.0299739	0.456597	0.318732	0.510818
Calpain 9_A0A3P9BAN0	-0.700305	-0.34801	-0.352295	0.000855752	0.0197673	0.0316782
Integrin beta_A0A3P9BAN3;A0A3P9BAA8	0.00993148	-0.00713861	0.0170701	0.847693	0.889994	0.643111
Claudin_A0A3P9BAX7	-0.219647	-0.272871	0.0532245	0.140005	0.0126982	0.686519
Keratocan_A0A3P9BB15;A0A3P9BAY9	-0.0537891	0.163367	-0.217156	0.848385	0.650849	0.621314
Calcium-binding mitochondrial carrier protein Aralar1_A0A3P9BB82;A0A3P9B0G1;A0A3P9B0H3;A0A3P9BAZ2	-0.0161614	-0.0031241	-0.0130373	0.493365	0.900616	0.563722
Lumican_A0A3P9BB08	0.159241	0.400542	-0.241302	0.427671	0.00946462	0.167844
Nuclear transcription factor Y subunit gamma_A0A3P9BB23;A0A3P9BB48	0.0360061	-0.0789735	0.11498	0.638275	0.242109	0.115972
Endoplasmic reticulum protein 44_A0A3P9BB84;A0A3P9BB69	-0.021039	-0.0145205	-0.00651849	0.681058	0.740209	0.897026
Cytoplasmic dynein 1 intermediate chain 2_A0A3P9BBA6;A0A3P9BB89;A0A3P9BBK4	-0.0489165	0.0362974	-0.0852139	0.527196	0.625082	0.358957
Aminopeptidase_A0A3P9BBC1	0.00272642	0.090467	-0.0877406	0.946828	0.0378491	0.0369846
Peptidylprolyl isomerase_A0A3P9BBC2	0.032046	-0.150365	0.182411	0.913594	0.636033	0.227356
Protein transport protein Sec61 subunit beta_A0A3P9BBE2	0.131257	0.09058	0.0406772	0.111302	0.263608	0.48701
Decorin_A0A3P9BBE5	0.0877469	0.386335	-0.298588	0.458711	0.0455019	0.0880871
UMP-CMP kinase_A0A3P9BBH7;A0A3P9BBJ4	-0.336333	-0.223525	-0.112808	0.0500258	0.154908	0.186093
Heterogeneous nuclear ribonucleoprotein Q_A0A3P9BBJ9	-0.0379499	-0.0951351	0.0571852	0.500429	0.131637	0.392439
Collagen alpha-1(XII) chain_A0A3P9BBK6	-0.638217	-1.07957	0.441349	0.105672	0.0412701	0.050469
Inosine-5'-monophosphate dehydrogenase_A0A3P9BBP5;A0A3P9BBL3;A0A3P9BBN3;A0A3P9BBM9	0.153273	0.169513	-0.0162402	0.068955	0.0717278	0.84465
Phospholipase D3_A0A3P9BBL7	0.234974	0.171901	0.0630731	0.0192025	0.0461862	0.0678216
TRPM8 channel-associated factor homolog_A0A3P9BBU5;A0A3P9BBR9;A0A3P9BBU8;A0A3P9BC60	-0.155495	0.0106038	-0.166099	0.131404	0.873309	0.177681
Malate dehydrogenase_A0A3P9BBY5	-0.0820318	0.0226852	-0.104717	0.186283	0.712026	0.0823843
Tyrosine-protein kinase_A0A3P9BBZ0;A0A3P9BC03	0.0483296	-0.0403579	0.0886875	0.569811	0.590781	0.139056
Collagen alpha-1(I) chain_A0A3P9BC04	0.310694	0.271854	0.0388401	0.0729118	0.137108	0.738665
26S proteasome regulatory subunit RPN11_A0A3P9BC07	-0.0723287	-0.0395773	-0.0327514	0.082634	0.11632	0.354825
Staphylococcal nuclease domain-containing protein_A0A3P9BC47;A0A3P9BC27	-0.00458698	-0.0535791	0.0489921	0.961203	0.525129	0.49184
Programmed cell death 6 interacting protein_A0A3P9BC36	-0.0505283	0.0495136	-0.100042	0.300169	0.522996	0.187355
Complement C2_A0A3P9BC42	0.854277	0.773414	0.0808628	0.0334292	0.0157913	0.73665
Neuroblast differentiation-associated protein AHNAK_A0A3P9BCF1;A0A3P9BCC8;A0A3P9BC62;A0A3P9BCC9	-0.435791	-0.301906	-0.133885	0.0176238	0.0694026	0.458718
Fibronectin_A0A3P9BC81;A0A3P9BCP5;A0A3P9BCG0	0.687915	0.413917	0.273998	0.219025	0.214145	0.555128
Small RNA binding exonuclease protection factor La_A0A3P9BCM7;A0A3P9BCB2	0.118089	0.0386847	0.0794044	0.230268	0.604619	0.237587
Transgelin_A0A3P9BCD5	0.0479984	0.283647	-0.235648	0.731825	0.00711331	0.0784973
Integrin beta_A0A3P9BCT7;A0A3P9BCV9;A0A3P9BCF5	-0.162626	-0.395333	0.232707	0.0267443	0.00530985	0.0255958
Small nuclear ribonucleoprotein U5 subunit 40_A0A3P9BCG1	-0.0557612	-0.0388496	-0.0169117	0.194638	0.351187	0.59472
Malic enzyme_A0A3P9BCL1;A0A3P9BCI2	0.171874	0.0356577	0.136217	0.325323	0.849076	0.118569
Xaa-Pro dipeptidase_A0A3P9BCM1;A0A3P9BCR8	0.0632404	0.0275085	0.0357318	0.393852	0.771707	0.627813
5-aminoimidazole-4-carboxamide ribonucleotide formyltransferase_A0A3P9BCM9;A0A3P9BCM6	-0.143734	-0.193063	0.0493293	0.125729	0.0337709	0.617961
Laminin subunit beta 3_A0A3P9BCN0	0.250186	-0.0424863	0.292672	0.454428	0.791345	0.412133
Fatty acid-binding protein, heart_A0A3P9BCN5	-0.191096	-0.0499073	-0.141189	0.115537	0.615359	0.0669374
Apolipoprotein A-Ib_A0A3P9BCQ0	1.19272	0.837483	0.355236	0.00361788	0.000293063	0.0552585
Ras-related protein Rab-6A_A0A3P9BCS8;A0A3P9D9Q8;A0A3P9BQU9;A0A3P9BCS9;A0A3P9BCR0;A0A3P9DIP4;A0A3P9DAC5;A0A3P9DI50	-0.042133	-0.0366532	-0.00547986	0.695313	0.56007	0.95321
ATP synthase subunit beta_A0A3P9BD22;A0A3P9CPS3	-0.109195	-0.0341172	-0.0750773	0.280689	0.499601	0.428899
Farnesyltransferase, CAAX box, alpha_A0A3P9BD23	0.0182368	0.0668214	-0.0485846	0.5343	0.0979596	0.24276
Eukaryotic translation initiation factor 3 subunit H_A0A3P9BD67;A0A3P9BDN5	0.0085609	-0.0228245	0.0313854	0.910688	0.666579	0.730626
Rac family small GTPase 2_A0A3P9CUH1;A0A3P9D6X5;A0A3P9CTH9;A0A3P9BD87	-0.17537	-0.222331	0.0469615	0.111422	0.0685463	0.521817
Developmentally regulated GTP binding protein 2_A0A3P9BDB3;A0A3P9BD91	0.0916608	0.0633448	0.028316	0.0596085	0.203466	0.557811
Perilipin_A0A3P9BD99	0.107588	0.107872	-0.000283514	0.464931	0.32452	0.998182
Alpha-1-antitrypsin homolog_A0A3P9BDA0	1.05041	0.944389	0.106018	0.0093235	0.00978185	0.602345
UDP-glucose 4-epimerase_A0A3P9BDC0	0.171864	0.0463708	0.125493	0.022656	0.543644	0.151629
Heat shock protein 90 beta family member 1_A0A3P9BDF3;A0A3P9BDD2	0.193048	0.105466	0.087582	0.0417497	0.304453	0.229804
CDGSH iron sulfur domain 1_A0A3P9BDD4	-0.10464	-0.0460563	-0.0585834	0.249066	0.475649	0.58281
Protein CutA homolog_A0A3P9BDF1	0.36492	0.296133	0.0687866	0.0541187	0.0904426	0.351704
Alpha-1-antitrypsin homolog_A0A3P9BDG8	0.795515	0.653853	0.141662	0.0403423	0.00265426	0.520898
Wiskott-Aldrich syndrome protein family member_A0A3P9BDL2;A0A3P9BE37	-0.0634263	0.0417563	-0.105183	0.253949	0.539107	0.122848
Cell surface A33 antigen_A0A3P9BDM9;A0A3P9BDV4	1.56441	1.68722	-0.122811	0.000625383	0.000328488	0.21958
Proteasome subunit alpha type_A0A3P9BLP8;A0A3P9BDN6	-0.0979481	-0.0369134	-0.0610346	0.043001	0.33137	0.117714
Vesicle-trafficking protein SEC22b-B_A0A3P9BDN7;A0A3P9BDN8	2.41079e-05	0.00313787	-0.00311376	0.999779	0.96671	0.973326
N-acetylneuraminate pyruvate lyase_A0A3P9BDQ6	0.0183884	0.0126203	0.00576808	0.807023	0.902778	0.938937
Retinol dehydrogenase 7_A0A3P9BDR7	-0.0842744	-0.0974635	0.0131891	0.28889	0.0736136	0.846755
Proteasome 26S subunit, ATPase 1_A0A3P9BDY2	-0.00592352	-0.0040737	-0.00184982	0.927683	0.946712	0.983059
Complement C3-like_A0A3P9BE11;A0A3P9BEG5	2.04267	1.98217	0.060501	0.0223437	0.0566571	0.887163
Betaine--homocysteine S-methyltransferase 1_A0A3P9BE17	-0.404916	-0.399268	-0.00564834	0.369796	0.365589	0.981718
FLII actin remodeling protein_A0A3P9BE25;A0A3P9BEE9	0.1437	0.0920632	0.0516363	0.0198746	0.000971131	0.241207
Hypoxanthine phosphoribosyltransferase_A0A3P9BE77	-0.0014275	-0.00662071	0.0051932	0.989595	0.942434	0.969737
AP-3 complex subunit beta_A0A3P9BEA8	0.328358	0.225051	0.103307	0.0017745	0.0279257	0.134321
Tubulin-specific chaperone A_A0A3P9BEE5	-0.228384	-0.300654	0.0722703	0.166125	0.0448118	0.656175
Complement C3_A0A3P9BEG5	2.03245	1.95946	0.0729827	0.0635714	0.0980822	0.895691
Galactokinase 1_A0A3P9BEH2	0.506521	0.264796	0.241725	0.104557	0.309429	0.40323
Prefoldin subunit 6_A0A3P9BEJ7	0.138909	0.0866038	0.0523051	0.0832776	0.144316	0.24808
PWI domain-containing protein_A0A3P9BEK9	-0.11444	-0.154527	0.040087	0.304544	0.149577	0.577874
Ectonucleoside triphosphate diphosphohydrolase 3_A0A3P9BEL6;A0A3P9BEL4	-0.0565625	-0.0835391	0.0269765	0.355213	0.171937	0.713666
Chloride intracellular channel protein_A0A3P9BEM9	0.207044	0.182704	0.0243404	0.172742	0.229933	0.559305
Transmembrane 9 superfamily member_A0A3P9BES4;A0A3P9BES6	-0.00657335	0.0757418	-0.0823151	0.925507	0.274992	0.39787
GIT ArfGAP 1_A0A3P9BFD1;A0A3P9BEZ3;A0A3P9BEU3	0.276643	0.133786	0.142857	0.113946	0.0146108	0.334363
Microsomal glutathione S-transferase 3_A0A3P9BF23	0.0902916	0.0381918	0.0520998	0.614068	0.822895	0.535181
Cholesterol 24-hydroxylase_A0A3P9BU06;A0A3P9BTZ7;A0A3P9BFB5;A0A3P9BF86;A0A3P9BRU6	0.0859705	0.155208	-0.0692377	0.701814	0.472486	0.792395
RNA binding motif protein X-linked_A0A3P9BFA7	0.317064	0.283132	0.0339324	0.000224418	0.0163098	0.620278
14-3-3 protein zeta_A0A3P9BFC6	-0.219213	-0.174902	-0.0443114	0.00152591	0.0814382	0.612485
Protein NDRG1_A0A3P9BFK4;A0A3P9BFG4;A0A3P9BFM7	-0.103363	0.035021	-0.138384	0.331632	0.452275	0.239891
Isoamyl acetate hydrolyzing esterase 1 (putative)_A0A3P9BFG8	-0.0387733	0.0939949	-0.132768	0.794966	0.653748	0.469698
Linkage group 5 C12orf10 homolog_A0A3P9DEZ5;A0A3P9BFM5	-0.0956197	-0.0426819	-0.0529378	0.305614	0.43714	0.604507
Bleomycin hydrolase_A0A3P9BFU3	-0.0650603	0.00871424	-0.0737746	0.250822	0.8247	0.117403
Collagen alpha-1(II) chain_A0A3P9BFV9;A0A3P9CTF5	0.464127	0.400682	0.0634448	0.000439487	0.00504288	0.356482
Poly(rC) binding protein 2_A0A3P9BGK4;A0A3P9BFZ2;A0A3P9BG30	0.102399	0.0150537	0.0873457	0.230412	0.775342	0.36455
Four and a half LIM domains 1_A0A3P9BG51;A0A3P9BG52	0.723248	0.849319	-0.12607	0.000879138	0.0119889	0.435094
Coatomer subunit gamma_A0A3P9BG89;A0A3P9BG66	0.0113884	0.0126462	-0.00125777	0.845291	0.799263	0.969647
Alpha-ketoglutarate-dependent dioxygenase FTO_A0A3P9BG90	0.394285	0.51439	-0.120105	0.0684862	0.00753509	0.357595
Complement component C7_A0A3P9BG95	0.865649	0.692637	0.173011	0.00114615	0.00941681	0.228943
Non-histone chromosomal protein HMG-14A_A0A3P9BG96	0.141509	0.154507	-0.0129981	0.423942	0.214148	0.938923
Dual specificity mitogen-activated protein kinase kinase 2_A0A3P9BG99	0.045947	0.0382509	0.00769604	0.535477	0.260259	0.908027
SH3 domain-binding glutamic acid-rich-like protein_A0A3P9BGH2;A0A3P9BGC5	0.16063	0.240113	-0.0794831	0.580752	0.317811	0.675142
Glyceraldehyde-3-phosphate dehydrogenase_A0A3P9BGE1	-0.0366513	0.0170143	-0.0536656	0.351902	0.572149	0.0886254
Nucleoside diphosphate kinase_A0A3P9BGG0;A0A3P9BGH4	-0.21862	-0.138664	-0.0799563	0.0354489	0.0264282	0.377987
Cathepsin D_A0A3P9BGN7	0.0824203	0.0903177	-0.00789746	0.29751	0.233528	0.855681
RNA helicase_A0A3P9BGT8	0.0741984	0.145048	-0.0708497	0.590867	0.0736598	0.57125
Guanine nucleotide-binding protein G(k) subunit alpha_A0A3P9BGT9	-0.0671775	0.0023349	-0.0695124	0.47916	0.965368	0.478864
Succinate dehydrogenase [ubiquinone] flavoprotein subunit, mitochondrial_A0A3P9BGU4	0.137093	0.158439	-0.0213453	0.233257	0.233304	0.776308
Glycine N-methyltransferase_A0A3P9BGV1	-0.0490099	0.162243	-0.211253	0.743781	0.368413	0.177274
Cartilage acidic protein 1_A0A3P9BGV2	1.20397	1.06085	0.143128	0.00502218	0.00251558	0.421383
Sulfurtransferase_A0A3P9BGV5	0.0348544	0.19641	-0.161556	0.845655	0.136571	0.271015
Oxoglutarate dehydrogenase (succinyl-transferring)_A0A3P9BGV7	-0.2066	-0.124082	-0.0825178	0.0041722	0.0932733	0.19623
Receptor protein-tyrosine kinase_A0A3P9BGY6	0.978615	0.806625	0.17199	0.130948	0.119229	0.709659
Rho-related GTP-binding protein RhoA-C_A0A3P9BHB6;A0A3P9BGZ1	-0.0634756	0.0570449	-0.120521	0.648881	0.571241	0.417802
Uncharacterized protein_A0A3P9BH35;A0A3P9DL74	0.445651	0.516958	-0.0713065	0.215068	0.146802	0.828586
72 kDa gelatinase_A0A3P9BH68;A0A3P9BF33	0.663984	0.549434	0.11455	0.0121406	0.0124946	0.409464
Glutathione transferase_A0A3P9BH70;A0A3P9BHC6	0.056609	0.0385672	0.0180418	0.803324	0.770441	0.931671
Transforming growth factor-beta-induced protein ig-h3_A0A3P9BH89	0.11825	0.248095	-0.129845	0.493079	0.228779	0.407568
Exocyst complex component Sec8_A0A3P9BH94	0.0959312	0.103676	-0.00774499	0.222148	0.165761	0.918373
Phosphoglycerate mutase_A0A3P9BH96	-0.177985	-0.111545	-0.0664407	0.024844	0.0958998	0.291225
Fibrinogen gamma chain_A0A3P9BHB0;A0A3P9BHA5	1.28163	0.988712	0.292913	0.0908767	0.0229486	0.507605
Low-density lipoprotein receptor-related protein 1_A0A3P9DQM8;A0A3P9BHD9	0.221749	0.267817	-0.0460685	0.100455	0.097571	0.580917
Regulator of chromosome condensation 2_A0A3P9BHF6	-0.246677	-0.237594	-0.00908257	0.0326795	0.0358564	0.528391
Proteasome subunit alpha type_A0A3P9BHH4;A0A3P9BH71	-0.0867756	-0.0346166	-0.052159	0.132399	0.578801	0.516227
ATP synthase subunit b_A0A3P9BHH6;A0A3P9BHH5	-0.0386714	-0.0165391	-0.0221323	0.369452	0.371878	0.5878
Ribosomal protein L22_A0A3P9BHI0	-0.0673111	-0.135068	0.0677566	0.155881	0.0411296	0.284841
Acyl-CoA dehydrogenase family member 9_A0A3P9BHK0;A0A3P9BHY1	0.189448	0.295453	-0.106005	0.115161	0.0345292	0.0527443
Elongation factor 2_A0A3P9BHK3;A0A3P9DJB7;A0A3P9DIQ7;A0A3P9BHN0	-0.0863212	-0.0955319	0.00921068	0.285411	0.1701	0.887221
Procollagen-lysine 5-dioxygenase_A0A3P9BHM2	0.180904	0.0705552	0.110349	0.358963	0.744326	0.256111
von Willebrand factor A domain-containing protein 5A-like_A0A3P9DKM3;A0A3P9C9T7;A0A3P9BHM5;A0A3P9C8P9	0.0525752	0.205904	-0.153329	0.797378	0.290528	0.391967
Tropomodulin 3_A0A3P9BHN9;A0A3P9BI71	0.11296	0.221863	-0.108903	0.319206	0.00593742	0.320516
Cleavage stimulation factor subunit 2_A0A3P9BHT3;A0A3P9BI11	-0.0274292	-0.117856	0.0904272	0.764379	0.123952	0.290213
Dynactin subunit 2_A0A3P9BHV0;A0A3P9BHW6	0.0281053	0.0541582	-0.0260529	0.664055	0.364732	0.444965
Extended synaptotagmin-1_A0A3P9BHV8	0.285422	0.285668	-0.000246322	0.0634994	0.109415	0.998761
Alcohol dehydrogenase 1_A0A3P9BHY6	0.695944	0.710786	-0.0148424	0.120162	0.0673904	0.960829
Profilin_A0A3P9BHZ4	0.177907	0.229239	-0.0513313	0.141333	0.0969417	0.406278
Pyruvate kinase_A0A3P9BI08;A0A3P9BI45	-0.0932724	-0.0965381	0.00326569	0.163708	0.191702	0.925294
Alcohol dehydrogenase 1_A0A3P9BI43	0.885188	0.829669	0.055519	0.0124178	0.00784922	0.72974
Lamina-associated polypeptide 2_A0A3P9BI66	-0.022312	0.0136937	-0.0360057	0.650835	0.692393	0.352379
EF-hand domain family member D2_A0A3P9BI68;A0A3P9BI60;A0A3P9AV93	-0.0786373	-0.105385	0.0267481	0.483765	0.290377	0.752965
Tripeptidyl aminopeptidase_A0A3P9BI86	-0.0418665	0.00909465	-0.0509611	0.67516	0.915277	0.531185
Trans-1,2-dihydrobenzene-1,2-diol dehydrogenase_A0A3P9BI99	0.0244706	0.0637428	-0.0392722	0.858308	0.660043	0.710598
Sushi repeat-containing protein SRPX2_A0A3P9BIA6	0.541999	0.393214	0.148785	0.0226078	0.0114798	0.255533
MICOS complex subunit MIC13_A0A3P9BIB1;A0A3P9B637	0.0193564	0.0700472	-0.0506908	0.860205	0.338827	0.646273
COP9 signalosome complex subunit 4_A0A3P9BIB4;A0A3P9BIH1	0.0230392	0.0575292	-0.03449	0.655782	0.201132	0.334223
SH3 domain containing 21_A0A3P9BID6	-0.116177	-0.0660951	-0.0500819	0.165679	0.398843	0.0912544
Alpha-2-HS-glycoprotein_A0A3P9BIT2;A0A3P9BIC6;A0A3P9BIG8;A0A3P9BIE8	1.23117	1.22792	0.00324976	0.00403269	0.000246801	0.980517
von Willebrand factor A domain-containing protein 5A-like_A0A3P9DKM3;A0A3P9BI21;A0A3P9BJ67;A0A3P9BIG7;A0A3P9BIK6;A0A3P9BH35;A0A3P9BGX0;A0A3P9BIF4;A0A3P9BHM5;A0A3P9DL74;A0A3P9BHE6;A0A3P9BH92;A0A3P9BGU0	0.237722	0.260895	-0.0231732	0.00610905	0.0241473	0.750842
Serine/threonine-protein phosphatase 6 regulatory subunit 2_A0A3P9BII5	-0.0013244	0.0827402	-0.0840646	0.971351	0.0547925	0.123256
Fascin actin-bundling protein 1_A0A3P9BIK9;A0A3P9C776;A0A3P9BJ62	0.0530043	-0.0749741	0.127978	0.836323	0.763151	0.471287
RNA binding motif protein 4.3_A0A3P9BIM8;A0A3P9DV07	-0.0300142	-0.102493	0.072479	0.727656	0.14729	0.35481
Actin beta_A0A3P9C418;A0A3P9C4Q3;A0A3P9BIN3;A0A3P9C4N7;A0A3P9C4R7;A0A3P9CA82;A0A3P9C449;A0A3P9C9Q6;A0A3P9BIS7;A0A3P9C439	-0.213644	-0.0608132	-0.152831	0.1141	0.185147	0.224874
Lactose-binding lectin l-2_A0A3P9BIR2	1.13909	0.935584	0.203511	0.00288291	0.00149412	0.136686
Carboxypeptidase B2_A0A3P9BF70;A0A3P9BJJ3;A0A3P9BKX7;A0A3P9BIS5;A0A3P9BLP1	1.02975	0.881367	0.148383	9.79813e-05	0.000674866	0.0383812
Complement factor H-related protein 1_A0A3P9BJI1;A0A3P9BIS8	1.17124	1.06051	0.110731	0.000965758	0.00184208	0.400274
SEC31 homolog A, COPII coat complex component_A0A3P9BIU1;A0A3P9BIW0;A0A3P9BIX6;A0A3P9BJT7	0.0765745	-0.0554983	0.132073	0.612986	0.746203	0.234281
Cytoplasmic FMR1-interacting protein_A0A3P9C5G7;A0A3P9BIU7;A0A3P9BL06	-0.0513373	0.0179819	-0.0693192	0.167729	0.657867	0.050246
60S ribosomal protein L31_A0A3P9BIX0	-0.137622	-0.163469	0.0258472	0.0225611	0.00436025	0.578983
Late endosomal/lysosomal adaptor and MAPK and MTOR activator 1_A0A3P9BIX1	0.14122	0.102627	0.038593	0.288159	0.283698	0.72737
Fibrillin 1_A0A3P9BIX7	0.967034	0.83075	0.136285	0.0112054	0.0015736	0.446866
Cohesin subunit SA-2_A0A3P9BIY6	0.0154997	-0.02557	0.0410697	0.826949	0.763895	0.701812
Enolase-phosphatase E1_A0A3P9BJ30	-0.00333936	-0.035924	0.0325846	0.957613	0.407978	0.559744
Rab GDP dissociation inhibitor_A0A3P9BJY3;A0A3P9BJ38	-0.0681162	0.0438125	-0.111929	0.427109	0.474086	0.1466
Moesin_A0A3P9BK35;A0A3P9CTF6;A0A3P9AUR5;A0A3P9CTH7;A0A3P9BKS7;A0A3P9BJ55;A0A3P9AUS6;A0A3P9BJW8	0.198245	0.23119	-0.0329456	0.0913845	0.0195745	0.691368
ATP synthase membrane subunit f_A0A3P9BJ60	-0.190537	-0.0671206	-0.123417	0.0959834	0.133408	0.25891
Persulfide dioxygenase ETHE1, mitochondrial-like_A0A3P9BJ61	-0.063602	0.0394677	-0.10307	0.134179	0.425531	0.0775677
X-ray repair cross-complementing protein 5_A0A3P9BJC7	-0.194252	-0.123078	-0.0711743	0.0197308	0.0139087	0.245704
Alpha-2-antiplasmin_A0A3P9BJH0;A0A3P9BKA0	1.11512	1.03154	0.0835854	0.00766427	0.0178741	0.689643
Ubiquitin carboxyl-terminal hydrolase 7_A0A3P9BKF6;A0A3P9BJN0	-0.0366043	0.0103057	-0.04691	0.506997	0.794126	0.474833
Coagulation factor XIII B chain_A0A3P9BJQ7	0.44221	0.37612	0.0660908	0.00917579	0.0626789	0.632287
Biotinidase_A0A3P9BJS6;A0A3P9BKI5	-0.213715	-0.331152	0.117437	0.495921	0.350864	0.795797
26S proteasome non-ATPase regulatory subunit 11B_A0A3P9BJU5;A0A3P9BK15	0.0258383	0.0380277	-0.0121894	0.715771	0.299309	0.866842
Chloride intracellular channel protein_A0A3P9BJX0	0.298435	0.542211	-0.243776	0.00978489	0.00130761	0.00501503
Plectin_A0A3P9BKC0;A0A3P9BK58;A0A3P9BKU5;A0A3P9BK01;A0A3P9BK71;A0A3P9BK64	0.00683294	-0.15213	0.158963	0.896373	0.0337456	0.00838376
Apoptosis inducing factor mitochondria associated 1_A0A3P9BK39	0.0333796	0.0705877	-0.0372081	0.471211	0.0628121	0.467051
GATOR complex protein SEC13_A0A3P9BK44	-0.1052	-0.118021	0.0128217	0.171872	0.0987679	0.775882
Dynamin-1-like protein_A0A3P9BK47;A0A3P9BK78	-0.00340022	0.0855181	-0.0889183	0.904615	0.00377985	0.0192186
Prefoldin subunit 5_A0A3P9BK63	0.190856	0.0951395	0.0957167	0.301182	0.39968	0.519137
DnaJ homolog subfamily C member 2_A0A3P9DV59;A0A3P9BK75	-0.0318478	-0.00972012	-0.0221277	0.193859	0.87403	0.720392
Phosphoglycolate phosphatase_A0A3P9BK88	0.0147114	-0.145586	0.160297	0.909613	0.00587698	0.294098
Acyl-CoA synthetase long chain family member 4_A0A3P9BK91	0.043616	-0.0428401	0.0864561	0.793193	0.73685	0.671481
26S proteasome AAA-ATPase subunit RPT1_A0A3P9BK96	-0.0511691	-0.0065292	-0.0446399	0.228776	0.798084	0.325277
Thioredoxin domain-containing protein 17_A0A3P9BKC1	-0.11586	-0.0575334	-0.0583269	0.261242	0.499329	0.43697
Cell division control protein 42 homolog_A0A3P9BKC6	0.153281	0.208958	-0.0556775	0.00557752	0.0132674	0.305901
Protein kinase C_A0A3P9BKE2;A0A3P9B3P9;A0A3P9B3M4;A0A3P9BZH6;A0A3P9C0H2;A0A3P9BKI6	-0.170449	-0.101229	-0.0692196	0.214031	0.173704	0.605849
RNA-binding protein FUS_A0A3P9BKF7	-0.0697727	-0.0683854	-0.00138725	0.26831	0.298564	0.979528
Electron transfer flavoprotein subunit beta_A0A3P9BKH5	0.00230458	0.0354662	-0.0331616	0.971136	0.603605	0.355421
Vesicle-fusing ATPase_A0A3P9BKH7;A0A3P9BKL3	-0.106154	-0.102759	-0.00339527	0.0361128	0.0201512	0.9031
Glyoxalase domain-containing protein 4_A0A3P9BKH8	-0.0279057	-0.0243958	-0.00350991	0.838942	0.842598	0.982604
Biotinidase_A0A3P9BKI5	-0.293091	-0.316516	0.0234249	0.352001	0.395739	0.960771
Serine/arginine-rich splicing factor 1_A0A3P9BKU1;A0A3P9BKS2	-0.099197	-0.0560473	-0.0431497	0.160295	0.300926	0.59124
Calcium-binding protein 39_A0A3P9BKT0	0.387069	0.360697	0.0263713	0.0194845	0.0433225	0.837887
Septin_A0A3P9BKV6	0.256946	0.228201	0.028745	0.0221223	0.0677424	0.786899
Thioredoxin-disulfide reductase_A0A3P9BKV8	-0.0187568	0.00371347	-0.0224702	0.653125	0.893337	0.642667
Protein argonaute-3_A0A3P9BKY0;A0A3P9BQ24;A0A3P9BL49;A0A3P9DM28;A0A3P9DLM3;A0A3P9BL76;A0A3P9DLH2;A0A3P9BQ34	0.186783	0.201788	-0.015005	0.127264	0.109233	0.908132
UDP-glucuronosyltransferase_A0A3P9BKY2	0.123105	0.236908	-0.113803	0.601562	0.278678	0.683218
Cleavage and polyadenylation specificity factor subunit 6_A0A3P9BL10;A0A3P9BKY9	0.0483165	-0.00674517	0.0550617	0.322664	0.860869	0.213543
Phenazine biosynthesis-like domain-containing protein 2_A0A3P9BL19	0.718374	0.712772	0.00560133	0.0219565	0.00583958	0.975171
Small nuclear ribonucleoprotein E_A0A3P9BK92;A0A3P9BL57	-0.0954383	-0.0479833	-0.047455	0.109807	0.331256	0.26913
Serine/arginine-rich splicing factor 6_A0A3P9B3V9;A0A3P9DLT3;A0A3P9DK74;A0A3P9DLT4;A0A3P9BL60	0.179866	0.0870179	0.0928482	0.00220341	0.383914	0.332991
Dolichyl-diphosphooligosaccharide--protein glycosyltransferase subunit 2_A0A3P9BLJ7	0.0143429	-0.0187794	0.0331223	0.859296	0.823892	0.370544
Complex I-49kD_A0A3P9BLM5	0.345477	0.117374	0.228102	0.0943033	0.0241275	0.197401
Ubiquitin thioesterase_A0A3P9BLV1	0.0303344	0.168528	-0.138193	0.740397	0.0278118	0.0990309
Annexin_A0A3P9BLY5	0.0660644	0.269149	-0.203084	0.664676	0.069702	0.0424865
Collagen type I alpha 2 chain_A0A3P9BM02	0.386289	0.315252	0.0710363	0.0576405	0.113737	0.61215
Procollagen-proline 4-dioxygenase_A0A3P9BMW3;A0A3P9BM04	0.198137	0.0531803	0.144957	0.347045	0.807824	0.327971
Ras-related protein Rab-18-B_A0A3P9BM22;A0A3P9BM34	0.166148	0.214334	-0.0481859	0.0353271	0.0291933	0.457024
Ubiquitin carboxyl-terminal hydrolase_A0A3P9BM35;A0A3P9BN19	0.127062	0.272682	-0.14562	0.511343	0.162581	0.435141
cAMP-dependent protein kinase type II-alpha regulatory subunit_A0A3P9BM44;A0A3P9BM62	0.0653548	0.0555385	0.00981629	0.121734	0.00296347	0.772632
Calcium uniporter protein_A0A3P9BM57	-0.119457	-0.0802827	-0.0391738	0.135988	0.353549	0.528888
Charged multivesicular body protein 2A_A0A3P9BM94	-0.221128	0.0290046	-0.250132	0.00245528	0.49909	0.00412703
Calmodulin_A0A3P9CQ56;A0A3P9BM97	-0.045268	-0.0551726	0.00990452	0.502276	0.351384	0.880931
Tubulin domain-containing protein_A0A3P9BME9	0.0726865	0.155613	-0.0829268	0.305496	0.0630987	0.00607903
Dehydrogenase/reductase SDR family member 11_A0A3P9BP14;A0A3P9BMI2;A0A3P9BMI8;A0A3P9BMJ9;A0A3P9BN94;A0A3P9BN35	0.687126	0.864087	-0.17696	0.00396383	1.44127e-05	0.0835429
Dihydropyrimidinase-related protein 3_A0A3P9BMJ3	0.407188	0.625712	-0.218524	0.0754301	0.00896841	0.138766
Junction plakoglobin_A0A3P9BMR2;A0A3P9BMN9	-0.309563	-0.269442	-0.0401216	0.00287889	0.0512239	0.73473
Osteoclast stimulating factor 1_A0A3P9BMP5	-0.151793	-0.0678675	-0.0839256	0.0327753	0.232904	0.0133327
Protein Z-dependent protease inhibitor_A0A3P9BMQ3	1.10689	0.927309	0.179582	0.00106432	0.000142895	0.101899
Cytoglobin-1_A0A3P9BMR8	0.0880068	0.193331	-0.105324	0.39561	0.136621	0.133174
Sodium/potassium-transporting ATPase subunit beta_A0A3P9BMT2	-0.229349	-0.161624	-0.0677253	0.0321158	0.00117015	0.427484
Nucleosome assembly protein 1 like 1_A0A3P9CLS1;A0A3P9CNB2;A0A3P9BMU7;A0A3P9BMU3	-0.0730765	-0.112836	0.039759	0.285097	0.0575367	0.581252
Dermatopontin_A0A3P9BMV1	0.457846	0.558373	-0.100527	0.102211	0.101073	0.724639
Dehydrogenase/reductase SDR family member 11_A0A3P9BP14;A0A3P9BN78;A0A3P9BN35;A0A3P9BMW2	0.060802	0.178683	-0.117881	0.589624	0.1426	0.011336
Keratin, type I cytoskeletal 13_A0A3P9B600;A0A3P9BMW9;A0A3P9B610	-0.13489	-0.13011	-0.00478013	0.273643	0.0335187	0.970283
Phosphoribosyl pyrophosphate synthase-associated protein 1_A0A3P9DC34;A0A3P9DD68;A0A3P9BMX0	0.0394967	0.106297	-0.0668005	0.585688	0.0584305	0.328725
Tricarboxylate transport protein, mitochondrial_A0A3P9BN08	0.19192	0.194471	-0.00255095	0.232209	0.0803942	0.985642
Epsin 2_A0A3P9BN11	-0.222963	-0.156152	-0.0668112	0.0061325	0.018466	0.207597
Keratin, type I cytoskeletal 13_A0A3P9BN31;A0A3P9BN41	-0.311366	-0.176364	-0.135002	0.132557	0.187209	0.456974
ATP synthase subunit alpha_A0A3P9BN70;A0A3P9AX73	-0.0456795	-0.00913129	-0.0365482	0.420736	0.844977	0.479932
Nucleolar and coiled-body phosphoprotein 1_A0A3P9BN80	0.0674091	-0.0786003	0.146009	0.422365	0.301255	0.039196
RELA proto-oncogene, NF-kB subunit_A0A3P9BP61;A0A3P9BN82	0.240009	0.236161	0.00384814	0.000184651	4.90765e-05	0.835138
Multifunctional fusion protein_A0A3P9BNA9;A0A3P9BN85	0.0454796	0.145293	-0.0998133	0.331062	0.00998343	0.0701794
Small ArfGAP 1_A0A3P9BN97;A0A3P9BP49	0.0158803	-0.0195306	0.0354109	0.866363	0.7237	0.740502
Dihydrolipoyllysine-residue succinyltransferase component of 2-oxoglutarate dehydrogenase complex, mitochondrial_A0A3P9CHX4;A0A3P9BNC4;A0A3P9BNA6	-0.119865	-0.0805709	-0.0392944	0.0877857	0.073344	0.480226
Acyl-CoA synthetase family member 2_A0A3P9BNC2	0.181899	0.397173	-0.215274	0.0847493	0.00243679	0.0336005
Lipoma-preferred partner homolog_A0A3P9BND9	0.102606	0.0441545	0.058451	0.10868	0.275194	0.369384
Small monomeric GTPase_A0A3P9BNF2;A0A3P9BPC1	-0.00143757	0.0251771	-0.0266146	0.985032	0.569066	0.689905
Twinfilin actin binding protein 1_A0A3P9BNI2	-0.0476449	0.0171719	-0.0648168	0.463511	0.771242	0.441652
Junction plakoglobin_A0A3P9BMR2;A0A3P9BMN9;A0A3P9BNJ7	-0.305847	-0.288029	-0.0178175	0.00337106	0.0377681	0.881737
Rho GDP-dissociation inhibitor 1_A0A3P9BNP0;A0A3P9BNQ8	-0.00447877	0.147369	-0.151847	0.944683	0.091576	0.0247418
O-acetyl-ADP-ribose deacetylase MACROD2_A0A3P9BNR4	-0.12871	0.00245912	-0.131169	0.215269	0.984016	0.349488
Retinol dehydrogenase 13_A0A3P9BNR6;A0A3P9D6V4;A0A3P9BY28	0.0301057	0.111219	-0.0811136	0.482347	0.0457831	0.168521
Voltage-dependent anion-selective channel protein 1_A0A3P9BNX8;A0A3P9BP03	0.0543652	0.0402283	0.0141369	0.249014	0.185979	0.742357
Ubiquitin-conjugating enzyme E2 N_A0A3P9BP16	-0.216334	-0.123299	-0.0930351	0.0518213	0.0994002	0.27624
Ubiquitin-conjugating enzyme E2 L3_A0A3P9BP17;A0A3P9BP18	-0.108626	-0.08067	-0.0279561	0.0670741	0.184396	0.652483
Phospholipid transfer protein_A0A3P9BP38	0.817169	0.838205	-0.0210367	0.0576772	0.11504	0.953361
60S ribosomal protein L36a_A0A3P9BP46	-0.0326058	-0.053998	0.0213922	0.461778	0.0855718	0.616211
5'-nucleotidase, cytosolic II_A0A3P9BPB2;A0A3P9BP70	-0.0309086	0.0945609	-0.12547	0.623239	0.0252123	0.0781576
40S ribosomal protein S3a_A0A3P9BP78	-0.124704	-0.117575	-0.00712912	0.0323314	0.0348058	0.788336
Complement C8 alpha chain_A0A3P9BP97	0.810877	0.608984	0.201893	0.00103795	0.0347787	0.226688
Ezrin-radixin-moesin-binding phosphoprotein 50_A0A3P9BPA1	0.28807	0.198349	0.0897208	0.0130452	0.06347	0.23894
S-phase kinase-associated protein 1_A0A3P9BPC3	0.0801428	0.138496	-0.0583533	0.342618	0.0806426	0.359395
40S ribosomal protein S26_A0A3P9BPG4	-0.10448	-0.127409	0.0229285	0.358614	0.117301	0.860631
Sorting nexin_A0A3P9BPI6	-0.0133704	0.00463371	-0.0180041	0.672882	0.817047	0.522837
Rac family small GTPase 1_A0A3P9BPJ8	0.462786	0.317417	0.145369	0.100596	0.219225	0.591509
60S ribosomal protein L26_A0A3P9BPK2	-0.0484554	-0.080233	0.0317776	0.562323	0.220111	0.74152
Diablo homolog, mitochondrial_A0A3P9BPK6	0.0311715	0.0807341	-0.0495627	0.630204	0.267221	0.180029
GrpE protein homolog_A0A3P9BPL6	0.0617356	-0.00774842	0.069484	0.343079	0.898667	0.32884
Ribosome-binding protein 1_A0A3P9BPL8;A0A3P9BQK7	0.0506683	-0.148342	0.19901	0.863874	0.566882	0.391014
Ribonucloprotein_A0A3P9BPN6	-0.0562194	-0.0321784	-0.024041	0.482219	0.546803	0.738012
Ketimine reductase mu-crystallin_A0A3P9BPQ1	0.0374385	0.217013	-0.179574	0.594178	0.0569287	0.0421381
Uncharacterized LOC101474366_A0A3P9BPQ5	-0.296598	-0.215521	-0.081076	0.0339126	0.129748	0.374049
AP-3 complex subunit delta_A0A3P9BPQ8	0.103418	0.0737613	0.0296571	0.0213399	0.0864515	0.322021
Secretion associated Ras related GTPase 1B_A0A3P9BPR0	-0.0515389	-0.0183404	-0.0331986	0.0812869	0.397336	0.227073
Cofilin-2_A0A3P9BPR3	-0.299975	-0.2083	-0.0916746	0.088016	0.111004	0.380583
Latent-transforming growth factor beta-binding protein 2_A0A3P9BPS6	0.60957	0.425054	0.184516	0.00213235	0.0866115	0.212596
Mesencephalic astrocyte derived neurotrophic factor_A0A3P9BPS8	0.262364	0.0680049	0.194359	0.0970909	0.334056	0.169837
Plexin-B2_A0A3P9BPV4	-0.113847	-0.134857	0.0210105	0.164864	0.114329	0.832256
Mitogen-activated protein kinase_A0A3P9BPV8	-0.0973239	-0.0332539	-0.06407	0.272871	0.526475	0.343602
Sorcin_A0A3P9BPW1	-0.285288	-0.232493	-0.0527949	0.0681093	0.138461	0.495126
Cystatin-like_A0A3P9BPX3	1.07722	0.776205	0.30101	0.00142329	0.0113697	0.0978462
Cytochrome b-c1 complex subunit 2, mitochondrial_A0A3P9BPY2;A0A3P9BPY8	0.148395	0.124535	0.0238594	0.115263	0.0374034	0.721453
Protein argonaute-2_A0A3P9BQ24;A0A3P9BQ34	0.325177	0.304762	0.0204141	0.0303098	0.0154128	0.822602
Atrial natriuretic peptide-converting enzyme_A0A3P9BQ51;A0A3P9BQ47	0.698253	0.542488	0.155765	0.000549969	0.0390823	0.303707
Complement component 8 subunit beta_A0A3P9BQ83	0.749627	0.589273	0.160354	0.000293546	0.0209785	0.220582
Glutathione reductase_A0A3P9BQ93	-0.0590371	0.150987	-0.210024	0.43211	0.119126	0.0305368
BolA-like protein 2_A0A3P9BQA3	0.138635	0.145546	-0.00691181	0.208241	0.15834	0.891772
Death associated protein like 1_A0A3P9BQA8	-0.222131	-0.158554	-0.0635763	0.378862	0.31782	0.770783
Eukaryotic translation initiation factor 6_A0A3P9BQE2;A0A3P9BQB2	-0.0502838	-0.0449616	-0.00532227	0.554372	0.477507	0.958387
Proliferation-associated protein 2G4_A0A3P9BQJ3	0.153099	0.175227	-0.0221281	0.0140378	0.0282413	0.56025
Adenylate kinase 2, mitochondrial_A0A3P9BQL7;A0A3P9DKC6	-0.047417	-0.0838741	0.0364571	0.476917	0.110869	0.535431
RNA-binding protein 4.1_A0A3P9BQN3;A0A3P9DUE5	-0.0987922	-0.0216578	-0.0771344	0.00191695	0.521849	0.0741206
Signal peptidase complex catalytic subunit SEC11_A0A3P9BQN5	0.143278	0.118268	0.0250101	0.0297972	0.14448	0.65785
DELTA-stichotoxin-Hcr4a_A0A3P9BQT1	-0.583229	-0.214431	-0.368797	0.00760399	0.245162	0.149252
Fumarate hydratase, mitochondrial_A0A3P9BQT9	-0.0630154	0.00639451	-0.0694099	0.193191	0.883485	0.103435
Bryoporin_A0A3P9BQU3	-0.527392	-0.180049	-0.347343	0.00772871	0.261277	0.101495
Tropomyosin 4_A0A3P9CLU8;A0A3P9BRE9;A0A3P9BQV0;A0A3P9BRB2;A0A3P9BS67;A0A3P9BQT7;A0A3P9DL96;A0A3P9BRB6	0.0157371	-0.0244923	0.0402294	0.778348	0.669429	0.26176
Catenin alpha 1_A0A3P9BQW6;A0A3P9BQX6	-0.141578	-0.110189	-0.0313897	0.0156185	0.0655064	0.559167
Protein kinase cAMP-dependent type I regulatory subunit alpha_A0A3P9BQW7	0.0627941	0.0817391	-0.0189449	0.18599	0.0639404	0.714586
COP9 signalosome complex subunit 6_A0A3P9BQX1	0.063579	0.0644819	-0.000902828	0.0123809	0.222091	0.984554
Talin-2_A0A3P9BQX3	1.66703	1.59717	0.0698559	0.0389931	0.0579361	0.870424
RAB8A, member RAS oncogene family_A0A3P9DF34;A0A3P9D6E6;A0A3P9D7S7;A0A3P9AW31;A0A3P9BQZ1	-0.0446305	0.00345315	-0.0480836	0.129682	0.790074	0.138442
Protein kinase C delta type_A0A3P9BR48;A0A3P9BR25	-0.140123	-0.0695808	-0.0705421	0.128858	0.312188	0.217362
Protein transport protein SEC23_A0A3P9BR98;A0A3P9BR58	-0.0105559	-0.0186347	0.00807879	0.786255	0.506543	0.865596
RuvB-like helicase_A0A3P9BR90	-0.0537367	-0.0384596	-0.0152772	0.203714	0.20279	0.619526
Dynactin subunit 4_A0A3P9BRB3;A0A3P9BR94	0.0633488	0.0970249	-0.0336761	0.0380871	0.145885	0.550298
Talin-1_A0A3P9BR96	0.0948507	0.0863078	0.00854287	0.135125	0.164996	0.781163
Dynein light chain roadblock_A0A3P9BRA4	0.0430152	-0.0147219	0.0577371	0.734099	0.851984	0.591695
Ras-related protein Rab-1B_A0A3P9CRD3;A0A3P9CRC8;A0A3P9BRA6	-0.154801	-0.104739	-0.0500617	0.163936	0.150046	0.630159
Myoferlin_A0A3P9BRC0	0.0769604	0.145232	-0.0682715	0.131508	0.00644265	0.159847
Fumarylacetoacetate hydrolase domain-containing protein 2_A0A3P9BRG5	0.138217	0.183132	-0.0449146	0.321863	0.179353	0.717747
Ras-related protein rab7_A0A3P9BRG9;A0A3P9BX93	-0.0154891	0.0136212	-0.0291103	0.795963	0.808496	0.675683
15-hydroxyprostaglandin dehydrogenase [NAD(+)]_A0A3P9BRI3	-0.186155	-0.23767	0.051515	0.362236	0.21951	0.760872
Putative aminopeptidase W07G4.4_A0A3P9BRJ8	-0.0648632	0.00550482	-0.070368	0.473187	0.949573	0.550625
Actin-related protein 2/3 complex subunit 4_A0A3P9BRK5;A0A3P9AT80;A0A3P9ATH5	-0.0834005	-0.0547113	-0.0286891	0.0059571	0.119718	0.402058
Nodal modulator 1_A0A3P9BRL8;A0A3P9BRL5	-0.0244515	-0.0501861	0.0257346	0.442515	0.299936	0.607165
Proliferating cell nuclear antigen_A0A3P9BRM5	-0.109228	-0.16247	0.0532421	0.626566	0.336294	0.839096
Ribokinase_A0A3P9BSM0;A0A3P9BRR3	-0.244569	-0.190158	-0.0544108	0.297009	0.402107	0.39195
Protein transport protein SEC61 subunit alpha_A0A3P9BT35;A0A3P9BRR6;A0A3P9BT47;A0A3P9BRS8	0.111923	0.0129286	0.0989943	0.341473	0.864905	0.317781
High density lipoprotein binding protein_A0A3P9BRX0	0.19416	0.0557961	0.138364	0.292069	0.72919	0.206479
5-demethoxyubiquinone hydroxylase, mitochondrial_A0A3P9BRZ5	-0.13195	-0.109124	-0.0228254	0.111352	0.196747	0.815527
Jupiter microtubule associated homolog 2_A0A3P9BS58	0.465041	0.270856	0.194185	0.069983	0.0385101	0.311897
Glutathione peroxidase_A0A3P9BS78	0.956691	0.868029	0.0886623	0.0438746	0.0896199	0.801137
Splicing factor 3a subunit 1_A0A3P9BSB3	0.025515	0.0183137	0.00720125	0.780875	0.749208	0.942672
Progesterone receptor membrane component 1_A0A3P9BSE4;A0A3P9BSH6	0.25041	0.260069	-0.00965924	0.129121	0.0322895	0.937621
Phosphoglycerate kinase_A0A3P9BSJ1;A0A3P9BTI9	-0.158473	-0.07733	-0.0811429	0.014678	0.0848122	0.0170162
Plasminogen activator inhibitor 1 RNA-binding protein_A0A3P9BSJ4	0.144699	0.198848	-0.0541494	0.118194	0.0684242	0.371351
Mannose-P-dolichol utilization defect 1 protein homolog_A0A3P9BSK3	-0.240475	-0.161561	-0.0789139	0.0971024	0.140822	0.413733
RNA helicase_A0A3P9BGT8;A0A3P9BSN3	-0.0319634	-0.0394426	0.00747912	0.663458	0.478434	0.90006
40S ribosomal protein S15a_A0A3P9BSP9	-0.0983331	-0.11524	0.0169067	0.0234119	0.0776424	0.720324
Septin_A0A3P9BTQ7;A0A3P9BSR6;A0A3P9BSR4	-0.31454	-0.433432	0.118893	0.104673	0.012522	0.544546
Collagen type VII alpha 1 chain_A0A3P9BST2	-0.0486255	-0.474551	0.425925	0.563685	0.00855442	0.00415851
Septin-2_A0A3P9BST3	0.041983	0.0592737	-0.0172908	0.0943752	0.0486783	0.458427
Heterogeneous nuclear ribonucleoprotein H1_A0A3P9BSV9	-0.0631759	-0.0324998	-0.030676	0.288518	0.436349	0.567027
NPL4 homolog, ubiquitin recognition factor_A0A3P9BSY4;A0A3P9BT48	-0.0428365	-0.0280472	-0.0147893	0.380128	0.466187	0.624052
Clathrin light chain_A0A3P9B0W6;A0A3P9B0B8;A0A3P9BT26;A0A3P9B096	0.0504974	-0.0561828	0.10668	0.604996	0.360641	0.288578
Peptidyl-prolyl cis-trans isomerase_A0A3P9BT38;A0A3P9BT28	0.199099	0.268468	-0.0693696	0.245563	0.0994309	0.69351
Guanine nucleotide-binding protein G(i) subunit alpha-2_A0A3P9BT37	0.0203722	0.0561276	-0.0357554	0.865651	0.548864	0.718766
Peroxiredoxin-1_A0A3P9BT50	-0.10391	-0.162338	0.0584271	0.34448	0.117606	0.564429
Acetyl-CoA acyltransferase 2_A0A3P9BT60	0.134441	0.164099	-0.0296579	0.286413	0.223963	0.593135
Aldehyde dehydrogenase family 9 member A1-B_A0A3P9BT80	0.252888	0.33186	-0.0789715	0.0798917	0.0860165	0.605228
Interferon-induced protein 44-like_A0A3P9BT94;A0A3P9CHT1;A0A3P9CIA0;A0A3P9CHK0;A0A3P9CHE5;A0A3P9CHV7	0.176414	0.186968	-0.010554	0.0497466	0.0502816	0.715959
60S ribosomal protein L6_A0A3P9BTK1;A0A3P9BTL0;A0A3P9BTG3	-0.0167081	-0.0669336	0.0502255	0.896468	0.496525	0.742564
Anoctamin_A0A3P9BTH7;A0A3P9BUC3	-0.111584	-0.154599	0.043015	0.0661107	0.0436303	0.311057
Tubulin alpha chain_A0A3P9BTJ6;A0A3P9BTI4	0.0961225	0.139066	-0.0429439	0.242608	0.145798	0.427614
Tubulin alpha chain_A0A3P9DAG0;A0A3P9BTJ6	-0.595394	-0.490942	-0.104453	0.00344369	0.00597831	0.00275645
Ribosomal protein L5_A0A3P9BTM8	-0.0655033	-0.0903925	0.0248892	0.334621	0.127885	0.56807
Dynein light chain_A0A3P9BTR0	-0.0963697	-0.0587452	-0.0376245	0.297014	0.433182	0.736737
SUMO-activating enzyme subunit 2_A0A3P9BTR9	0.31333	0.32255	-0.00922013	0.0117082	0.00145206	0.898947
Voltage-dependent anion-selective channel protein 3_A0A3P9BTS4	0.304655	0.31356	-0.00890481	0.110425	0.0493939	0.952101
Annexin_A0A3P9BTT8	-0.302427	-0.188576	-0.113851	0.312635	0.526106	0.788333
Carbonic anhydrase_A0A3P9BTV5	-0.034827	0.12778	-0.162607	0.788875	0.353315	0.0624182
Choline transporter-like protein 2_A0A3P9BUY2;A0A3P9BU16;A0A3P9BTV7;A0A3P9BU91	0.124123	0.254814	-0.130692	0.413369	0.11337	0.411562
Lecithin-cholesterol acyltransferase_A0A3P9BTW2	0.901214	0.879151	0.0220628	0.0255849	0.0522635	0.935961
Basigin_A0A3P9BTW6;A0A3P9BUT7	0.106542	0.0920061	0.0145357	0.208081	0.219397	0.757019
AP complex subunit beta_A0A3P9BV13;A0A3P9BUV9;A0A3P9BU72	-0.056	-0.00619924	-0.0498008	0.132756	0.831364	0.180968
Non-POU domain containing, octamer-binding_A0A3P9BUA7	0.00450429	-0.0200962	0.0246005	0.886712	0.454129	0.385378
RNA helicase_A0A3P9BP84;A0A3P9BPA3;A0A3P9BCQ6;A0A3P9D011;A0A3P9D0R3;A0A3P9BP95;A0A3P9B809;A0A3P9AV72;A0A3P9BUB6;A0A3P9D0G5	0.190188	0.0747384	0.11545	0.230596	0.54777	0.483153
Tubulin alpha chain_A0A3P9BTM1;A0A3P9DA17;A0A3P9BUD2	0.0881832	0.154412	-0.0662289	0.190731	0.0320817	0.129367
Uncharacterized protein_A0A3P9DNX5;A0A3P9BUD8	-0.0941482	-0.00883291	-0.0853153	0.24332	0.769717	0.287619
RNA helicase_A0A3P9BUE3;A0A3P9DQ48	-0.011961	-0.0821129	0.0701519	0.927084	0.3957	0.601253
ATP synthase F1 subunit delta_A0A3P9BUH7	0.238214	0.126647	0.111567	0.00404349	0.188764	0.194173
Calpain-2 catalytic subunit_A0A3P9BFP5;A0A3P9BU98;A0A3P9BUW1;A0A3P9BUJ6;A0A3P9BFX8;A0A3P9BV35	-0.136115	0.0240787	-0.160193	0.0862177	0.668907	0.0401401
Golgi reassembly-stacking protein 2_A0A3P9BUJ7	-0.0647029	-0.0754489	0.010746	0.397249	0.234642	0.879098
Peroxiredoxin-1_A0A3P9BUK1	-0.14087	-0.0734555	-0.0674143	0.0577299	0.281051	0.398916
Unconventional myosin-Ie_A0A3P9BVC1;A0A3P9BUK2	-0.0973074	-0.0810427	-0.0162646	0.028335	0.21349	0.78048
ATPase ASNA1_A0A3P9BUL7	-0.0507274	-0.0852484	0.034521	0.234973	0.0773337	0.231661
Fibulin-1_A0A3P9BUM3	1.38003	1.06504	0.314989	0.0271428	0.170267	0.493018
Inactive carboxypeptidase-like protein X2_A0A3P9BUP9	0.0126759	-0.0796583	0.0923342	0.948059	0.703389	0.542103
Actin-depolymerizing factor_A0A3P9BUQ0	-0.456906	-0.482879	0.0259736	0.00807083	0.0104392	0.72732
Enhancer of mRNA-decapping protein 4_A0A3P9BUS9	0.122345	0.0933552	0.0289899	0.0383043	0.0478851	0.525241
Protein SGT1 homolog_A0A3P9BUV1	0.0394573	0.0333525	0.00610482	0.41053	0.432141	0.910087
Serine protease inhibitor A3K_A0A3P9BUZ4	1.29659	1.13961	0.156972	0.00322681	0.000713438	0.303696
HtrA serine peptidase 1_A0A3P9BV00;A0A3P9DQQ1;A0A3P9BIV1	1.10258	0.79398	0.308602	0.07484	0.0216218	0.425246
Glutathione peroxidase_A0A3P9BV03	0.0615368	0.229043	-0.167506	0.769623	0.2423	0.508361
Glia maturation factor_A0A3P9BV54	-0.267455	-0.156449	-0.111006	0.00530106	0.010392	0.0419638
Galectin_A0A3P9BV84;A0A3P9BW09	0.446129	0.330879	0.11525	0.0175755	0.0541635	0.344891
Septin_A0A3P9C160;A0A3P9BWA9;A0A3P9BVD2;A0A3P9C165;A0A3P9C133	0.0759405	0.0810445	-0.00510398	0.10203	0.0547245	0.874425
Serine and arginine rich splicing factor 5_A0A3P9BVD9	0.0313143	0.0215589	0.00975545	0.709195	0.66191	0.901113
Mucin-2_A0A3P9BVE6	-0.317383	0.149612	-0.466995	0.182581	0.421955	0.0826722
Protein tyrosine phosphatase type IVA 2-like_A0A3P9BVF8	-0.0638174	-0.0338445	-0.029973	0.626844	0.793577	0.736979
Poly [ADP-ribose] polymerase_A0A3P9BVG1	-0.0620766	-0.0298576	-0.032219	0.265735	0.682177	0.59659
Serpin family D member 1_A0A3P9BVH2	0.818032	0.725968	0.0920637	0.0450872	0.0130196	0.702245
Saccharopine dehydrogenase (putative)_A0A3P9BVS4;A0A3P9BVI5	0.075002	0.0722994	0.0027026	0.305422	0.443926	0.977244
Fibulin-1_A0A3P9BVJ3	1.34435	0.925443	0.418908	0.00390665	0.0927553	0.192646
60S ribosomal protein L14_A0A3P9BZH4;A0A3P9C0B7;A0A3P9BVK0;A0A3P9BXV6	-0.0883747	-0.157035	0.0686601	0.222435	0.0438069	0.339995
Aldehyde dehydrogenase family 9 member A1_A0A3P9BVL5	0.0350475	0.0971828	-0.0621353	0.913763	0.724537	0.839871
Transcription factor BTF3_A0A3P9BVM0	-0.19525	-0.087012	-0.108238	0.00210547	0.282136	0.226522
Methylmalonyl-CoA isomerase_A0A3P9BVR3	0.165862	0.128448	0.0374142	0.0606548	0.0443553	0.587903
Carboxylic ester hydrolase_A0A3P9BVW3	0.301364	0.497934	-0.19657	0.0227532	0.0118849	0.140933
Cathepsin S_A0A3P9BVY4	-0.137754	-0.158856	0.0211028	0.575416	0.461202	0.93539
Cathepsin K_A0A3P9BW06	0.43141	0.0125333	0.418877	0.187471	0.9555	0.176611
Hyaluronan binding protein 2_A0A3P9BW07	1.75005	1.6137	0.136354	0.0046883	0.00532275	0.539671
Alpha-2-macroglobulin-like_A0A3P9C546;A0A3P9CXM5;A0A3P9BVW5;A0A3P9BYT9;A0A3P9BVV0;A0A3P9C5I9;A0A3P9CWM1;A0A3P9BW21	0.10196	0.0547574	0.0472028	0.692023	0.772944	0.871395
Catalase_A0A3P9BW42;A0A3P9BYL8;A0A3P9BYQ1;A0A3P9DTU2;A0A3P9BWZ7	0.107311	0.0468195	0.0604917	0.314256	0.644645	0.356749
RAB2A, member RAS oncogene family_A0A3P9BW53	0.0606312	0.118932	-0.0583007	0.169402	0.0294579	0.0592601
Glutathione transferase_A0A3P9BW61	-0.121077	0.101116	-0.222193	0.584893	0.52778	0.259341
Annexin_A0A3P9BW76	-0.0674872	0.0651887	-0.132676	0.49159	0.376678	0.18377
Alanine--tRNA ligase_A0A3P9BW78	-0.244783	-0.179153	-0.0656307	0.000376953	0.000550012	0.0742241
Alpha-actinin-1_A0A3P9BWA1;A0A3P9BWW9	0.0618313	-0.0292388	0.09107	0.428015	0.444504	0.280057
Nicotinamide phosphoribosyltransferase_A0A3P9BWC4;A0A3P9BXE8	-0.058755	-0.0589735	0.000218501	0.510693	0.555685	0.998674
Fermitin family member 1_A0A3P9BWE7	-0.0583339	-0.0465838	-0.0117501	0.332639	0.416069	0.844765
Chromosome segregation 1-like protein_A0A3P9BWF0;A0A3P9BW64	0.0527051	0.0629372	-0.0102321	0.246967	0.0494702	0.778254
Chondroitin sulfate proteoglycan 4_A0A3P9BXC6;A0A3P9BWF9	-0.0943806	-0.17112	0.0767391	0.636728	0.427717	0.215845
Protein tyrosine phosphatase non-receptor type 23_A0A3P9BWK2;A0A3P9BWI7	0.133684	0.187357	-0.0536727	0.06452	0.0017774	0.348227
Adapter molecule crk_A0A3P9BWY5;A0A3P9BWK3	-0.16858	-0.0119084	-0.156671	0.00110373	0.82789	0.0442086
14-3-3 protein epsilon_A0A3P9BWL8;A0A3P9B633;A0A3P9B630;A0A3P9BWN9	-0.20768	-0.166639	-0.0410411	0.017588	0.00474645	0.464858
YKT6 v-SNARE homolog_A0A3P9BWM7	0.107168	0.0815763	0.0255914	0.112236	0.102831	0.605744
Aldehyde dehydrogenase family 9 member A1_A0A3P9BVL5;A0A3P9BVM4;A0A3P9BWP4	0.0203135	0.108855	-0.0885417	0.948309	0.695031	0.680922
Uncharacterized protein_A0A3P9BWP9	-0.148167	-0.0182855	-0.129881	0.0926573	0.736434	0.0998418
Elongation factor Tu_A0A3P9BWR0	0.022658	0.088968	-0.0663101	0.399692	0.0556644	0.0809231
Small nuclear ribonucleoprotein U5 subunit 200_A0A3P9BWS7	0.0661601	0.0416681	0.024492	0.314041	0.481558	0.623986
von Willebrand factor A domain containing 11_A0A3P9BWU9	0.326433	0.0906907	0.235742	0.158754	0.59609	0.155329
Transmembrane protein 223_A0A3P9BWZ4	0.682028	0.566333	0.115694	0.00683999	0.0224798	0.371387
Splicing factor 3b subunit 3_A0A3P9BWZ9;A0A3P9BXS8;A0A3P9DKV6	-0.0526649	-0.049923	-0.00274192	0.119651	0.0953191	0.912386
Dihydropyrimidinase-related protein 2_A0A3P9BX05;A0A3P9BMJ3	0.478113	0.724917	-0.246804	0.015837	0.00302551	0.0532891
Cathepsin B_A0A3P9BX12	0.201991	0.168364	0.0336272	0.190401	0.189704	0.819574
Eukaryotic translation initiation factor 3 subunit L_A0A3P9BX13	0.120243	0.0792213	0.0410213	0.0234723	0.00913951	0.292746
Transmembrane protein 11_A0A3P9BX36	-0.0393741	-0.017142	-0.0222321	0.517408	0.777282	0.469925
E3 SUMO-protein ligase RanBP2_A0A3P9BY59;A0A3P9BX54	-0.591239	-0.624758	0.0335194	0.0987401	0.0795034	0.798426
Protein mago nashi homolog_A0A3P9BX57	0.143347	0.225849	-0.0825015	0.135693	0.0248257	0.385021
Ceramidase_A0A3P9BX69	0.285819	0.314729	-0.0289099	6.35823e-05	0.000940322	0.399483
Cytochrome b-c1 complex subunit 1, mitochondrial_A0A3P9BX79	0.00472356	0.0336911	-0.0289675	0.921554	0.589327	0.520205
Sorting nexin-1_A0A3P9BX86;A0A3P9BXP1	0.0204482	0.069829	-0.0493808	0.670217	0.22358	0.164953
Tumor protein, translationally-controlled 1_A0A3P9BX99;A0A3P9BXB3	-0.172823	-0.16216	-0.0106633	0.0365877	0.0255802	0.85885
Dolichyl-diphosphooligosaccharide--protein glycosyltransferase subunit 1_A0A3P9BXA8	0.0642123	0.0102702	0.0539421	0.456261	0.870201	0.40281
Podocan_A0A3P9BYD3;A0A3P9BXB8	0.359592	0.372704	-0.0131124	0.0387934	0.0129299	0.892667
Caspase 20, apoptosis-related cysteine peptidase_A0A3P9BYY5;A0A3P9C5T5;A0A3P9C6Z3;A0A3P9C7F5;A0A3P9BXA5;A0A3P9DL97;A0A3P9BZH9;A0A3P9C7E4;A0A3P9BZM1;A0A3P9BXE6;A0A3P9BYW9	0.114219	0.162304	-0.0480842	0.53806	0.322755	0.824123
Ras-related protein Rab-11B_A0A3P9BX31;A0A3P9CMZ0;A0A3P9BXM6;A0A3P9BXG3;A0A3P9CUR2;A0A3P9CL30;A0A3P9B344	-0.0671677	-0.0442046	-0.0229631	0.0343684	0.0326148	0.423096
Small monomeric GTPase_A0A3P9BXI7	0.0065964	0.0527152	-0.0461188	0.874484	0.159686	0.215244
Glutathione S-transferase A_A0A3P9BYG0;A0A3P9BXL3;A0A3P9BXJ0;A0A3P9BY71	-0.172038	-0.0695074	-0.10253	0.525154	0.738227	0.64151
Non-specific lipid-transfer protein_A0A3P9BXL0	-0.214463	-0.129284	-0.0851791	0.0920209	0.253309	0.269947
Peptidyl-prolyl cis-trans isomerase_A0A3P9BXL7	0.147125	0.0765291	0.0705959	0.251111	0.518512	0.529886
Catenin delta-1_A0A3P9BXU5;A0A3P9BXN3;A0A3P9BXZ7;A0A3P9BXM2	-0.16959	-0.153761	-0.0158296	0.0716762	0.0299755	0.867225
Signal sequence receptor subunit gamma_A0A3P9BXT4	0.28398	0.145985	0.137995	0.0494017	0.183708	0.281221
Fibulin-5_A0A3P9BXU3	1.29438	0.918702	0.375677	0.0241432	0.117905	0.336235
Pentraxin 3_A0A3P9BXU6	1.36205	1.19444	0.167607	0.00682842	0.116425	0.651168
WD repeat domain 61_A0A3P9BXX7	0.142195	0.157751	-0.0155555	0.0970156	0.0631202	0.748653
Asparaginyl endopeptidase_A0A3P9BXZ0	-0.118081	-0.230922	0.112842	0.506439	0.0820415	0.599866
Receptor expression-enhancing protein_A0A3P9BY25	0.0236899	-0.0152145	0.0389044	0.811508	0.803662	0.652454
Actin related protein 10_A0A3P9BYB2;A0A3P9BY27	-0.0117054	0.0728668	-0.0845722	0.80123	0.230046	0.204594
Methylmalonate-semialdehyde dehydrogenase [acylating], mitochondrial_A0A3P9BY39	0.0450087	0.114145	-0.069136	0.559661	0.15845	0.0416679
Glutathione S-transferase A_A0A3P9BY42	-0.156236	0.0313471	-0.187583	0.528393	0.846572	0.471132
UDP-N-acetylglucosamine pyrophosphorylase 1_A0A3P9BY51	0.400292	0.480142	-0.07985	0.0294293	0.00827363	0.288867
Proteasome subunit beta_A0A3P9BY57;A0A3P9BYT3	-0.105057	-0.0142952	-0.0907621	0.0719152	0.792311	0.19971
Alcohol dehydrogenase (NADP(+))_A0A3P9BY65	0.0218763	0.0515406	-0.0296643	0.731638	0.282822	0.571606
Serine and arginine rich splicing factor 3_A0A3P9BY92	0.00146229	-0.00245763	0.00391992	0.977433	0.974966	0.951647
F-actin-capping protein subunit beta_A0A3P9BYC5	-0.0851463	-0.0259511	-0.0591952	0.290576	0.485124	0.438658
Glutathione S-transferase A_A0A3P9BYG0;A0A3P9BXL3	-0.320703	-0.239737	-0.0809659	0.32471	0.377088	0.685913
Ribosomal protein L37a_A0A3P9BYG2	-0.104008	-0.186844	0.0828356	0.227847	0.0133627	0.304804
Mannose-binding protein C_A0A3P9BYG7	0.965789	0.713886	0.251903	0.0084183	0.0218521	0.253006
Inter-alpha-trypsin inhibitor heavy chain H3-like_A0A3P9BYI0;A0A3P9BYI6	0.554902	0.614768	-0.0598654	0.342298	0.162145	0.902877
Actin, alpha skeletal muscle A_A0A3P9DMC0;A0A3P9DP62;A0A3P9AZH7;A0A3P9BYI7;A0A3P9B666;A0A3P9CQS3;A0A3P9DPJ0;A0A3P9DJH9;A0A3P9DP19	-0.145943	-0.02927	-0.116673	0.120883	0.536358	0.130121
ADP-dependent glucokinase_A0A3P9DEJ9;A0A3P9BYJ6	-0.12645	-0.140318	0.0138682	0.0272674	0.0345032	0.82498
Transportin 2_A0A3P9B924;A0A3P9DBU8;A0A3P9BYK3;A0A3P9BIV0	-0.114751	-0.103044	-0.0117068	0.0704635	0.117204	0.685319
Collagen alpha-2(VI) chain_A0A3P9BYQ2;A0A3P9BJD6	0.726069	0.598271	0.127797	0.048755	0.188198	0.709149
Cytochrome c oxidase subunit_A0A3P9BYQ3	0.0589276	0.317967	-0.259039	0.850781	0.189739	0.453397
Alpha-2-macroglobulin_A0A3P9BYS0;A0A3P9C393;A0A3P9BRF3;A0A3P9BYT9;A0A3P9C0D1;A0A3P9C0J6;A0A3P9C0N3;A0A3P9C0D2;A0A3P9C2L3;A0A3P9BY03	0.104127	0.108013	-0.00388654	0.684081	0.599451	0.989588
Drebrin like_A0A3P9BYS1;A0A3P9BZ59;A0A3P9BZ01;A0A3P9BYU6	0.172574	0.182597	-0.0100236	0.122969	0.0212461	0.914306
Aldose reductase_A0A3P9BYN1;A0A3P9BYS4	0.0866169	0.197831	-0.111214	0.446205	0.0739714	0.200001
Proteasome 26S subunit, ATPase 3_A0A3P9BYU9	-0.00946814	0.00127306	-0.0107412	0.752821	0.970605	0.695554
Ras homolog gene family, member Gd_A0A3P9BYV2	0.150192	0.122167	0.0280243	0.330102	0.327549	0.794894
Heterogeneous nuclear ribonucleoprotein H3_A0A3P9BYW5;A0A3P9BZW2	-0.116572	-0.0893473	-0.0272245	0.0243554	0.0119391	0.384117
ADP ribosylation factor interacting protein 1_A0A3P9BYW7	-0.00971509	0.0493833	-0.0590984	0.905204	0.58302	0.256698
Phenazine biosynthesis like protein domain containing_A0A3P9BYX1;A0A3P9BL19	0.430774	0.437091	-0.00631679	0.108683	0.0814942	0.971403
Protein kinase C_A0A3P9BYY6;A0A3P9BZX5	-0.372429	-0.121853	-0.250577	0.00098777	0.034399	0.00643791
Collagen type VI alpha 1 chain_A0A3P9BYZ7	0.760041	0.595953	0.164088	0.0254708	0.155188	0.583563
Ubiquitin conjugating enzyme E2 I_A0A3P9BZQ0;A0A3P9BZ25	-0.118202	-0.0701382	-0.0480638	0.195301	0.150493	0.593292
Tyrosine--tRNA ligase_A0A3P9BZ41	-0.128788	-0.038907	-0.089881	0.183816	0.653077	0.0395397
Mannose-binding protein C_A0A3P9BZ44	1.22661	1.08962	0.13699	0.00388646	0.00901425	0.459856
ATPase family AAA domain containing 3A_A0A3P9BZ48;A0A3P9BZ62	0.208357	0.163332	0.045025	0.30716	0.0580537	0.802949
Phosphatidylinositol transfer protein beta isoform_A0A3P9BZB8	0.0893274	0.0367063	0.0526211	0.0174324	0.373628	0.164072
SERPINE1 mRNA binding protein 1_A0A3P9BZF7;A0A3P9BZC8	-0.0604356	-0.060613	0.000177445	0.400697	0.39515	0.997931
ES1 protein homolog, mitochondrial_A0A3P9BZD6;A0A3P9BZD1	-0.16915	0.479264	-0.648414	0.303391	0.0101847	0.00365012
Protein SET_A0A3P9CYK2;A0A3P9BZE6	0.0027123	0.0376433	-0.034931	0.971034	0.458676	0.616274
PDZ and LIM domain 1_A0A3P9BZI1	0.0343801	0.0987915	-0.0644114	0.643657	0.170305	0.470836
Hyaluronan and proteoglycan link protein 3_A0A3P9BZK7	0.716413	0.586725	0.129688	0.0450317	0.130382	0.676663
Hexokinase_A0A3P9BZN6	0.0248508	0.0217634	0.00308741	0.597563	0.739321	0.956891
Branched chain keto acid dehydrogenase E1 subunit beta_A0A3P9BZN7;A0A3P9BZX2	-0.0663256	-0.0741512	0.00782561	0.511173	0.555454	0.947321
Spectrin alpha, non-erythrocytic 1_A0A3P9BZP3	0.292862	0.524267	-0.231406	0.0383054	0.00126147	0.0375872
Ribose-phosphate diphosphokinase_A0A3P9BZR7;A0A3P9D1V7;A0A3P9D2K1	0.0886972	0.164415	-0.0757183	0.428292	0.0940256	0.467865
Succinate dehydrogenase [ubiquinone] iron-sulfur subunit, mitochondrial_A0A3P9BZY4;A0A3P9D3L1;A0A3P9C048;A0A3P9BZW0;A0A3P9BZS4	0.0566647	0.0858186	-0.0291539	0.291024	0.169289	0.439156
Uncharacterized protein_A0A3P9BZV2	-0.417211	-0.247118	-0.170093	0.00183242	0.0227911	0.113939
Histone H1.0-B_A0A3P9BZZ2	0.253759	0.296247	-0.0424879	0.184851	0.0369778	0.786368
Eukaryotic translation initiation factor 3 subunit E_A0A3P9DLB7;A0A3P9BZZ3	0.0233153	-0.0212827	0.0445979	0.650785	0.573967	0.307474
Periostin_A0A3P9C010;A0A3P9C060	0.399466	0.307403	0.0920634	0.397765	0.480772	0.854142
NECAP endocytosis associated 2_A0A3P9C019	0.0255133	0.0572375	-0.0317242	0.725738	0.417199	0.676875
Succinate--CoA ligase [GDP-forming] subunit beta, mitochondrial_A0A3P9C021;A0A3P9BZQ3	0.283435	0.178824	0.104611	0.00799978	0.000794451	0.118775
Non-specific serine/threonine protein kinase_A0A3P9C0Z5;A0A3P9C077	-0.0158954	-0.00868599	-0.00720944	0.826639	0.899378	0.854742
Glucosamine-6-phosphate deaminase_A0A3P9C083;A0A3P9CZR6	-0.0163657	-0.111335	0.0949692	0.674819	0.0128419	0.0654464
POF1B actin binding protein_A0A3P9C089	-0.225812	-0.231143	0.00533194	0.0204388	0.0167813	0.950983
4a-hydroxytetrahydrobiopterin dehydratase_A0A3P9BZJ4;A0A3P9C0C6	-0.289301	-0.346014	0.0567129	0.513268	0.408442	0.839269
Creatine kinase_A0A3P9BNY2;A0A3P9C0E1	0.0564519	0.299375	-0.242923	0.768385	0.109417	0.0152398
Hydroxysteroid 17-beta dehydrogenase 12_A0A3P9C0E3	-0.54847	-0.29298	-0.25549	0.0396541	0.0935143	0.346155
Eukaryotic translation initiation factor 3 subunit A_A0A3P9C0E7	0.0315608	-0.0124645	0.0440252	0.434748	0.498946	0.310822
Heat shock 70 kDa protein 4_A0A3P9C0W6;A0A3P9C0G0	-0.122314	-0.0661189	-0.0561949	0.0411285	0.181891	0.34673
Protein disulfide-isomerase_A0A3P9C0I1	0.12481	0.128639	-0.00382955	0.041641	0.0410548	0.922254
Apoptosis inhibitor 5_A0A3P9C0J3	-0.0232358	-0.0102855	-0.0129503	0.638413	0.786263	0.804192
Complex III subunit 8_A0A3P9C0J4;A0A3P9C0X8;A0A3P9DE87	-0.061669	-0.0189231	-0.0427459	0.49527	0.784302	0.468278
Heterogeneous nuclear ribonucleoprotein A/B_A0A3P9C0P9;A0A3P9C0K4	-0.177504	-0.178443	0.000939114	0.0223015	0.0300222	0.982655
Eukaryotic translation initiation factor 3 subunit B_A0A3P9C0K8	0.0277872	-0.00340944	0.0311966	0.274616	0.749351	0.220438
Carboxypeptidase_A0A3P9C0M0	0.0735346	0.00545242	0.0680821	0.197641	0.913157	0.233906
Small nuclear ribonucleoprotein-associated protein_A0A3P9C0M5	-0.0835611	-0.151548	0.0679869	0.200122	0.0207911	0.217011
E3 ubiquitin/ISG15 ligase TRIM25_A0A3P9C0N2	-0.0434643	-0.012717	-0.0307473	0.704889	0.893066	0.665209
Hyaluronan and proteoglycan link protein 1_A0A3P9C0P6;A0A3P9C0R7	1.06327	0.748464	0.31481	0.0311803	0.037524	0.305609
ADP-ribosylation factor 6_A0A3P9D0I1;A0A3P9C1M0;A0A3P9C1Q6;A0A3P9C0R3	0.0386962	0.121291	-0.0825945	0.283663	0.00394543	0.0713607
Non-muscle caldesmon_A0A3P9C0T9	0.434337	0.351169	0.0831681	0.0116358	0.0379236	0.359748
Rho-related GTP-binding protein RhoA-B_A0A3P9C0V5;A0A3P9C118	0.185828	0.189888	-0.00406012	0.381501	0.162543	0.981585
Small monomeric GTPase_A0A3P9C113	-0.0535856	0.119988	-0.173573	0.629128	0.203891	0.0586276
Proteasome activator subunit 1_A0A3P9C136	-0.0168846	0.0624147	-0.0792993	0.818246	0.505898	0.385685
Transmembrane protein 43_A0A3P9C155	0.161583	0.212278	-0.0506948	0.0877746	0.0969488	0.5502
Phosphoinositide phospholipase C_A0A3P9C157;A0A3P9C173	-0.102067	-0.121001	0.0189343	0.00788845	0.0916898	0.75791
Eukaryotic translation initiation factor 3 subunit M_A0A3P9C166	-0.0428905	0.00758557	-0.0504761	0.418595	0.831098	0.402924
Peroxiredoxin 3_A0A3P9C177	-0.22525	-0.072902	-0.152348	0.0417808	0.334036	0.0758749
Transmembrane 9 superfamily member_A0A3P9C193	0.109647	0.093124	0.0165228	0.118156	0.153589	0.804016
26S proteasome non-ATPase regulatory subunit 6_A0A3P9C195	-0.0495314	-0.0237191	-0.0258123	0.185178	0.486102	0.504122
Pre-mRNA processing factor 39_A0A3P9C1C9;A0A3P9C1E8	0.0180721	-0.000727092	0.0187992	0.689707	0.982184	0.558188
Arginine--tRNA ligase, cytoplasmic_A0A3P9C1F2	-0.0581892	-0.059614	0.00142474	0.135101	0.186987	0.975255
Protein disulfide-isomerase_A0A3P9C1F3	0.150099	0.150746	-0.000646616	0.1528	0.133115	0.987994
Crystallin J1A_A0A3P9C1F4	0.099843	0.213483	-0.11364	0.527756	0.151996	0.236081
40S ribosomal protein S30_A0A3P9C1G2	0.176241	0.0720343	0.104207	0.22064	0.596499	0.54583
Versican core protein_A0A3P9C0I2;A0A3P9C108;A0A3P9C1G6;A0A3P9C0R9	1.8854	1.45641	0.42899	0.0500806	0.200226	0.476088
THO complex subunit 4_A0A3P9C1I2	0.0447072	-0.00917889	0.0538861	0.528739	0.912612	0.349269
Cleavage stimulation factor subunit 3_A0A3P9C1I7;A0A3P9C1Y8	0.211221	0.194438	0.0167825	0.0724053	0.0295507	0.85683
Keratin, type II cytoskeletal 8_A0A3P9C1K6	-0.36875	-0.39342	0.0246699	0.318076	0.299795	0.812707
Keratin, type I cytoskeletal 18_A0A3P9C1L4	-0.423004	-0.537654	0.11465	0.295414	0.206404	0.43101
Ubiquitin-conjugating enzyme E2 D2_A0A3P9C1Z3;A0A3P9B538;A0A3P9BDR6;A0A3P9C1L5	-0.277771	-0.208046	-0.069725	0.0600024	0.172828	0.511339
Insulin-degrading enzyme_A0A3P9C1R9;A0A3P9C1K3	-0.117037	-0.0434909	-0.0735466	0.524569	0.719039	0.7186
T-complex protein 1 subunit gamma_A0A3P9C1U0	-0.00519903	0.0100046	-0.0152036	0.953147	0.819427	0.850921
Peptidylprolyl isomerase_A0A3P9C1V0	0.120757	0.197565	-0.0768076	0.368087	0.0988077	0.304588
Integrin alpha-L-like_A0A3P9C1V8	0.399953	0.320929	0.0790244	0.324842	0.500169	0.807334
Rho GDP-dissociation inhibitor 1_A0A3P9C1Y6	0.355521	0.415352	-0.059831	0.108765	0.0202653	0.663368
Coagulation factor X_A0A3P9C264	0.675126	0.619274	0.0558517	0.00651398	0.00136686	0.57687
Drebrin 1_A0A3P9C268	0.256414	0.279233	-0.022819	0.0610939	0.13231	0.8516
Seryl-tRNA synthetase_A0A3P9C275	-0.225164	-0.0826997	-0.142464	0.00721356	0.138752	0.0543257
Vitamin K-dependent protein Z_A0A3P9C278	0.733746	0.585294	0.148452	0.0750165	0.040247	0.611231
Interferon-induced GTP-binding protein Mx_A0A3P9C286	-0.589842	-0.581479	-0.00836236	0.0161246	0.0121469	0.976161
Galectin_A0A3P9C299	-0.265028	-0.0151543	-0.249874	0.444443	0.963852	0.436111
mRNA cap guanine-N7 methyltransferase_A0A3P9C2C3	0.0488128	0.0717247	-0.0229119	0.327491	0.108199	0.653515
Glutamine amidotransferase_A0A3P9C2C7	0.0204959	0.0338801	-0.0133842	0.86375	0.34071	0.911636
Heat shock protein HSP 90-alpha_A0A3P9C2E1;A0A3P9C2R8	0.312474	0.253989	0.0584846	0.0376945	0.0702132	0.457757
Transcriptional activator protein Pur-beta_A0A3P9C2F8;A0A3P9CVS1	-0.0399695	0.0272274	-0.0671968	0.843414	0.853656	0.757893
Actin-related protein 2/3 complex subunit_A0A3P9C2I6;A0A3P9C3L5;A0A3P9C2G4	-0.00795568	-0.0350315	0.0270758	0.806764	0.319884	0.0027074
Forkhead box K1_A0A3P9C2G8	-0.0860669	-0.0225966	-0.0634703	0.30559	0.788774	0.583654
40S ribosomal protein S13_A0A3P9C2H0	-0.123212	-0.133086	0.00987421	0.214002	0.0978786	0.926232
Integrin subunit alpha 2_A0A3P9C2H4	0.0238052	-0.105852	0.129657	0.806448	0.256892	0.123123
40S ribosomal protein S29_A0A3P9C2J2	-0.128675	-0.171001	0.0423265	0.0410297	0.0221071	0.418452
Mothers against decapentaplegic homolog_A0A3P9CI17;A0A3P9C2L1;A0A3P9AXQ7;A0A3P9AYH3;A0A3P9DFF7;A0A3P9CI29	-0.0152335	-0.0535254	0.0382919	0.800303	0.371544	0.602137
Glutamine--fructose-6-phosphate transaminase (isomerizing)_A0A3P9C2R1;A0A3P9C2M4	-0.100282	0.0229437	-0.123226	0.227146	0.793262	0.238766
Coagulation factor VII-like_A0A3P9C2N2	0.822499	0.569441	0.253057	0.0242299	0.00057676	0.229237
ATP synthase subunit O, mitochondrial_A0A3P9C2N7	-0.106157	-0.0314706	-0.074686	0.118327	0.125644	0.222581
PHB domain-containing protein_A0A3P9C2P5;A0A3P9DDH7;A0A3P9CUD8	0.34823	0.444369	-0.0961388	0.0765937	0.0140998	0.493852
Serine/threonine-protein kinase_A0A3P9C2Q5;A0A3P9C511;A0A3P9CP22;A0A3P9C5N7;A0A3P9CP30;A0A3P9CPX3;A0A3P9C5I2;A0A3P9C322;A0A3P9C5I8	1.3102	0.849076	0.461125	0.0063109	0.000771197	0.0570799
NEDD8_A0A3P9D203;A0A3P9C2R2	0.0311673	-0.10386	0.135028	0.77281	0.342713	0.0856132
B30.2/SPRY domain-containing protein_A0A3P9C2S9	1.02998	0.845401	0.184581	0.0842659	0.0024827	0.584736
C-terminal-binding protein 1_A0A3P9C2T0	-0.00447114	0.0696591	-0.0741302	0.940077	0.336327	0.151012
Protein arginine N-methyltransferase 5_A0A3P9C2U5;A0A3P9C2X0	-0.258746	-0.272394	0.0136483	0.181842	0.120786	0.955578
Group XIIB secretory phospholipase A2-like protein_A0A3P9C2Y4	0.582074	0.461724	0.120349	0.123306	0.365129	0.724873
Guanine nucleotide-binding protein subunit gamma_A0A3P9C2Z5	0.276901	0.148199	0.128702	0.0918729	0.431882	0.369984
Alpha-1,4 glucan phosphorylase_A0A3P9C300;A0A3P9BQL3;A0A3P9BQI3;A0A3P9CSD6;A0A3P9CSC6	0.169848	0.123128	0.0467199	0.459233	0.601713	0.639926
Proteasome subunit alpha type_A0A3P9C310	-0.0623937	0.0256944	-0.0880881	0.0550543	0.496865	0.0544731
NADH dehydrogenase [ubiquinone] iron-sulfur protein 4, mitochondrial_A0A3P9C344	-0.0858659	-0.0800139	-0.00585198	0.144919	0.139773	0.859184
Inter-alpha-trypsin inhibitor heavy chain H3-like_A0A3P9C2Y9;A0A3P9C317;A0A3P9C346;A0A3P9C2F9	0.356321	0.370414	-0.014093	0.00804194	0.00832251	0.793743
Receptor for activated C kinase 1_A0A3P9C369	-0.168985	-0.161374	-0.00761104	0.00834855	0.0131584	0.714943
Cytochrome c oxidase subunit 4_A0A3P9C370	-0.196292	-0.0945411	-0.101751	0.0437143	0.260705	0.319993
Proteasome subunit beta_A0A3P9C375	0.0374758	0.0765504	-0.0390745	0.0593069	0.0725188	0.282135
Thioredoxin related transmembrane protein 1_A0A3P9C381	0.313739	0.361653	-0.0479144	0.00447593	0.0163501	0.623637
Inter-alpha-trypsin inhibitor heavy chain H3-like_A0A3P9C2D0;A0A3P9C2W9;A0A3P9C2Y9;A0A3P9C317;A0A3P9BJY0;A0A3P9BJX5;A0A3P9C395;A0A3P9C346;A0A3P9C2F9;A0A3P9BJP7	0.644994	0.586515	0.0584788	0.00333791	0.00169403	0.40322
Prothrombin_A0A3P9C3Y3;A0A3P9C397;A0A3P9C2B7	1.1415	0.969053	0.172447	0.00747541	0.00029627	0.312385
Alpha-L-fucosidase_A0A3P9C3B4	-0.0430786	0.0120564	-0.0551349	0.27807	0.759114	0.293455
Rap1 GTPase-GDP dissociation stimulator 1_A0A3P9C4F9;A0A3P9C3C8	0.0404659	0.116008	-0.075542	0.798045	0.348839	0.665912
Dihydropyrimidinase_A0A3P9C3E1	0.384668	0.0633298	0.321338	0.0105016	0.812857	0.199719
Aspartate--tRNA ligase, cytoplasmic_A0A3P9C3J1	-0.195941	-0.149081	-0.0468607	0.02203	0.0366453	0.501607
Phosphoglucomutase 1_A0A3P9C3J2	0.111993	0.18147	-0.0694767	0.532008	0.326751	0.178897
Transient receptor potential cation channel subfamily M member 4_A0A3P9C494;A0A3P9C3T8;A0A3P9C3K7;A0A3P9C3N9	-0.345215	-0.267338	-0.0778762	0.00573006	0.0210952	0.314738
Actin-related protein 2/3 complex subunit_A0A3P9C3L5	-0.107701	-0.0287419	-0.0789592	0.00316047	0.304713	0.0147155
Long-chain-fatty-acid--CoA ligase 1_A0A3P9C3M0	-0.359355	-0.350384	-0.00897103	0.0222313	0.00854672	0.920912
Calcium/calmodulin-dependent protein kinase_A0A3P9C447;A0A3P9B3L8;A0A3P9D4K6;A0A3P9B3I1;A0A3P9DPJ7;A0A3P9DQF6;A0A3P9DR18;A0A3P9B3H0;A0A3P9DQZ3;A0A3P9B3Q8;A0A3P9B3P1;A0A3P9D5A4;A0A3P9D3Q4;A0A3P9D4Z7;A0A3P9C3M5;A0A3P9B3G9;A0A3P9D3Y5;A0A3P9D4K2;A0A3P9DRD3	-0.0438112	-0.0197209	-0.0240903	0.479108	0.620259	0.683886
Keratin, type I cytoskeletal 19_A0A3P9C3N6	-0.264098	-0.336111	0.0720127	0.382191	0.276731	0.544169
Eukaryotic translation initiation factor 5B_A0A3P9C3P2;A0A3P9C3S2	0.0679615	-0.0579827	0.125944	0.229607	0.315415	0.00924929
Propionyl-CoA carboxylase subunit beta_A0A3P9C3Q8;A0A3P9C4H3	0.0963918	0.10715	-0.0107585	0.12494	0.0191521	0.831566
60S ribosomal protein L27a_A0A3P9C3T5;A0A3P9C490	-0.131331	-0.0988359	-0.0324948	0.159928	0.0154143	0.693572
Heterogeneous nuclear ribonucleoprotein A/B_A0A3P9C401	-0.18064	-0.218452	0.0378115	0.0801948	0.0328629	0.689241
Uncharacterized protein_A0A3P9C426;A0A3P9C572;A0A3P9C3T3;A0A3P9C3W6;A0A3P9C433	1.12898	0.879545	0.249431	0.130313	0.0521637	0.594878
Actin, cytoplasmic 1_A0A3P9C439	-0.0873084	-0.119048	0.0317391	0.531061	0.316624	0.820336
AMP deaminase_A0A3P9C468;A0A3P9C4G7	-0.232935	-0.0624064	-0.170529	0.0267456	0.613612	0.220753
40S ribosomal protein S25_A0A3P9C480;A0A3P9C4X1	-0.0612936	-0.108379	0.0470856	0.64093	0.44248	0.807018
Myotubularin_A0A3P9C482	0.55734	0.343473	0.213867	0.0118786	0.115969	0.273613
Programmed cell death 5_A0A3P9C4D8	0.0805365	0.0150985	0.065438	0.131747	0.76596	0.247346
Jupiter microtubule associated homolog 1_A0A3P9C4I7	0.0782252	0.0904885	-0.0122633	0.380172	0.450115	0.912493
Methylcrotonoyl-CoA carboxylase 2_A0A3P9C4K8	0.225986	0.166209	0.0597766	0.0129633	0.0111555	0.355348
Guanine deaminase_A0A3P9C718;A0A3P9C4L7	-0.459119	-0.368391	-0.0907273	0.0215092	0.0822404	0.674748
F-spondin_A0A3P9C513;A0A3P9C4P1	0.646878	0.629001	0.0178768	0.00485449	0.00933733	0.882842
Threonyl-tRNA synthetase_A0A3P9C4P4	-0.392335	-0.328001	-0.0643336	0.0133349	0.0212007	0.398345
Carboxypeptidase_A0A3P9C4Q9	0.176484	0.0267504	0.149734	0.0636486	0.746807	0.00221347
Syntaxin-7_A0A3P9C4R0	0.171603	0.0871553	0.0844481	0.0129407	0.0691815	0.113365
Linkage group 15 C6orf58 homolog_A0A3P9C4R4	-0.488626	-0.689857	0.201231	0.411371	0.300849	0.735729
Olfactomedin like 1_A0A3P9C4S2	0.557883	0.3839	0.173983	0.0480162	0.00355785	0.338637
Alpha-parvin_A0A3P9C4U5	0.243019	0.275359	-0.0323402	0.0617366	0.0575164	0.792556
Clathrin heavy chain_A0A3P9C5A9;A0A3P9C4U9;A0A3P9C5J5	0.437933	0.285675	0.152258	0.00313349	0.0869266	0.154499
Citrate hydro-lyase_A0A3P9C4Z7	0.192506	0.28026	-0.0877533	0.0176319	0.000524442	0.148512
Procollagen-proline 4-dioxygenase_A0A3P9C5K2;A0A3P9C505	0.335886	0.23979	0.0960953	0.030286	0.0574692	0.125887
Small nuclear ribonucleoprotein Sm D2_A0A3P9C512	-0.0854752	-0.0738463	-0.0116289	0.327704	0.344481	0.916306
Suppressor of tumorigenicity 14 protein_A0A3P9C541	-0.350638	-0.220961	-0.129678	0.0181086	0.0517378	0.223333
Aminopeptidase_A0A3P9C5Q1;A0A3P9C549	0.0821083	0.106086	-0.0239772	0.357518	0.322206	0.83228
Elongation factor 1-alpha_A0A3P9C5B1;A0A3P9DQD9;A0A3P9DKM7	-0.133489	-0.134168	0.000679005	0.418731	0.314554	0.997016
Alpha-2-macroglobulin_A0A3P9C5I9	0.215545	0.134144	0.0814005	0.52515	0.434197	0.809861
Peptidoglycan recognition protein 1_A0A3P9C5Q3;A0A3P9C5L1	-0.0936581	-0.0308892	-0.0627689	0.36377	0.772769	0.268288
2-phospho-D-glycerate hydro-lyase_A0A3P9C5Q6	-0.0840863	-0.0535019	-0.0305844	0.420025	0.491749	0.672187
Barrier to autointegration factor 1_A0A3P9C5S6;A0A3P9B653	-0.129379	-0.252823	0.123444	0.511663	0.164918	0.406543
Fructose-bisphosphate aldolase_A0A3P9C5W8	-0.231054	-0.0239753	-0.207079	0.154352	0.831992	0.102465
Pyrroline-5-carboxylate reductase_A0A3P9C5Z4	0.25726	0.330787	-0.0735277	0.0245838	0.00691573	0.097608
Vasodilator stimulated phosphoprotein_A0A3P9C619	0.0217618	-0.0580144	0.0797763	0.882992	0.653395	0.647987
40S ribosomal protein S7_A0A3P9C630;A0A3P9C622	-0.112308	-0.132024	0.0197161	0.339361	0.162453	0.859484
Adenylosuccinate synthetase_A0A3P9C647;A0A3P9C5G4	-0.0953189	-0.0477396	-0.0475793	0.429038	0.648024	0.695651
Eukaryotic translation initiation factor 5A_A0A3P9C650	-0.12948	-0.0785469	-0.0509333	0.0572697	0.175817	0.203896
Transmembrane protein 109_A0A3P9C657;A0A3P9C779	0.179328	0.15563	0.0236977	0.259764	0.304228	0.632665
ARP3 actin related protein 3 homolog_A0A3P9CDC2;A0A3P9C675	-0.176628	-0.119742	-0.0568863	0.0410767	0.0810702	0.464339
Aminoacyl tRNA synthase complex-interacting multifunctional protein 2_A0A3P9C676	-0.0748304	-0.0464556	-0.0283748	0.28463	0.408664	0.659446
Peroxiredoxin-5_A0A3P9C686	0.213942	0.175921	0.0380213	0.247018	0.20949	0.821241
Ecto-5'-nucleotidase_A0A3P9C690	0.297782	0.388744	-0.0909616	0.0634275	0.0426703	0.54976
Protein phosphatase Slingshot homolog 3_A0A3P9C6E1;A0A3P9C6D3	-0.11956	-0.034674	-0.0848857	0.192454	0.648517	0.0208657
Cleavage and polyadenylation specificity factor subunit 5_A0A3P9C6E7	0.0838776	0.0251971	0.0586805	0.287626	0.698548	0.436666
Caveolin_A0A3P9C6F6	0.381666	0.409045	-0.0273782	0.0992323	0.13125	0.895157
Casein kinase II subunit alpha_A0A3P9C6F8	-0.0224633	-3.34723e-05	-0.0224299	0.82348	0.999557	0.828431
2-phospho-D-glycerate hydro-lyase_A0A3P9C6I0;A0A3P9C6G0;A0A3P9C602	0.0178236	0.100113	-0.0822893	0.83674	0.305572	0.194537
Complement C4-B_A0A3P9C6H6	1.0076	0.897912	0.109688	0.0005366	0.00498251	0.360237
F-actin-capping protein subunit alpha_A0A3P9C741;A0A3P9B494;A0A3P9C6K1	-0.0954624	-0.0275679	-0.0678945	0.150615	0.502019	0.198261
Paraoxonase_A0A3P9C6M7	-0.0760663	-0.100215	0.0241489	0.691609	0.556422	0.870527
Heterogeneous nuclear ribonucleoprotein Q_A0A3P9C6M8	0.0728214	0.0202652	0.0525561	0.454795	0.74533	0.594038
Fructose-bisphosphate aldolase_A0A3P9C7E3;A0A3P9C6M9	-0.0135243	-0.00745161	-0.00607269	0.79617	0.787443	0.912733
Complement C4_A0A3P9C6P4	1.21356	1.04419	0.169366	4.21347e-05	0.00417455	0.192914
Pre-mRNA-processing factor 19_A0A3P9C6T4	-0.0742863	-0.034477	-0.0398093	0.035704	0.337879	0.157432
Dual specificity mitogen-activated protein kinase kinase 6_A0A3P9C6Y1;A0A3P9C6Z1	0.0683735	0.032586	0.0357875	0.221831	0.292517	0.48848
NACHT domain-containing protein_A0A3P9B4Y7;A0A3P9C6Z2;A0A3P9CZC7	0.069368	0.0786646	-0.00929661	0.602699	0.640521	0.955736
Glyoxylate reductase/hydroxypyruvate reductase_A0A3P9C703;A0A3P9C6G6	0.0895028	0.0714568	0.018046	0.400813	0.460362	0.878092
Testin_A0A3P9C7G7;A0A3P9C704	-0.0780028	-0.0193063	-0.0586965	0.296491	0.71659	0.333917
Isoleucyl-tRNA synthetase_A0A3P9C706;A0A3P9C733	-0.134412	-0.0662311	-0.0681808	0.0491378	0.416583	0.41929
Stress induced phosphoprotein 1_A0A3P9C714	-0.0216898	-0.00491458	-0.0167752	0.690123	0.790713	0.750512
6-phosphogluconate dehydrogenase, decarboxylating_A0A3P9C746	-0.0831652	-0.012721	-0.0704442	0.612668	0.930558	0.74317
Brain-specific angiogenesis inhibitor 1-associated protein 2_A0A3P9BU82;A0A3P9C753;A0A3P9BU53;A0A3P9C7S5;A0A3P9BTZ0;A0A3P9BU34;A0A3P9CHT4	-0.172776	-0.0939652	-0.0788107	0.0170122	0.369978	0.48621
Uncharacterized protein_A0A3P9C7B4	0.57234	0.221194	0.351146	0.197879	0.658876	0.477626
Uncharacterized protein_A0A3P9C7B7	0.88192	0.501372	0.380548	0.0301	0.334428	0.350771
Linkage group 10 C11orf54 homolog_A0A3P9C7C2;A0A3P9C8C6	-0.15945	-0.0277569	-0.131693	0.361917	0.84754	0.134224
Uncharacterized LOC112429885_A0A3P9CIH6;A0A3P9D7M6;A0A3P9C7J4	-0.0506396	0.149613	-0.200253	0.381779	0.00982554	0.0202333
Translocator protein_A0A3P9C7K0	0.316088	0.378986	-0.0628979	0.0170543	0.00098063	0.436555
40S ribosomal protein S17_A0A3P9C7K7;A0A3P9C825;A0A3P9C831	-0.140306	-0.179054	0.038748	0.129092	0.0562764	0.533923
High mobility group protein B2_A0A3P9C7K9	-0.114416	-0.0548106	-0.0596056	0.122986	0.141196	0.395539
Spermidine synthase_A0A3P9C7L6;A0A3P9C857	0.0762926	0.110155	-0.0338623	0.5339	0.217401	0.780093
Nucleophosmin_A0A3P9C7M7	-0.1383	-0.163047	0.0247475	0.340115	0.220791	0.809281
Proteasome subunit alpha type_A0A3P9C7N8	-0.110428	-0.0298743	-0.0805541	0.025134	0.436212	0.114679
Claudin_A0A3P9C7N9	-0.00941719	-0.0238078	0.0143906	0.884838	0.80092	0.867678
E3 ubiquitin-protein ligase_A0A3P9CWB0;A0A3P9CXZ4;A0A3P9C7Q4	0.156333	0.111473	0.0448605	0.0677676	0.0590698	0.424348
Collagen-binding protein_A0A3P9C7U7	-0.00551051	-0.207966	0.202456	0.985765	0.532527	0.194939
Aldehyde dehydrogenase 1 family member A2_A0A3P9C7V4;A0A3P9C8G1	0.247267	0.319966	-0.0726992	0.266636	0.170822	0.7325
Acetyl-CoA acyltransferase 1_A0A3P9C7W3;A0A3P9C900	0.0634085	0.0499421	0.0134664	0.570607	0.413463	0.911105
Transaldolase_A0A3P9C7X9;A0A3P9C7X3	0.149745	0.188299	-0.0385537	0.00799817	0.00298518	0.337532
Uncharacterized LOC101472611_A0A3P9CI14;A0A3P9D7L4;A0A3P9C822	0.161773	0.183077	-0.0213041	0.0534746	0.00497874	0.683339
Interferon-induced GTP-binding protein Mx_A0A3P9C896;A0A3P9CW77;A0A3P9B6V1;A0A3P9BQV3;A0A3P9CVC2;A0A3P9C8T5;A0A3P9C7Q7	-0.0481918	0.0055162	-0.053708	0.442701	0.815951	0.42414
Procollagen C-endopeptidase enhancer 2_A0A3P9C8D7	0.486663	0.452376	0.0342865	0.0787942	0.152556	0.832794
N-myc and STAT interactor_A0A3P9C8E5	0.353947	0.377559	-0.0236122	0.00128834	0.00379981	0.646458
Proteasome subunit beta_A0A3P9C943;A0A3P9C8G0	-0.00863901	-0.118457	0.109818	0.923191	0.449863	0.480166
Eukaryotic translation initiation factor 3 subunit C_A0A3P9C8J9	-0.0377841	-0.0386133	0.000829196	0.354544	0.0850118	0.981903
Damage specific DNA binding protein 1_A0A3P9C8N8	-0.0554292	-0.0146259	-0.0408034	0.597492	0.808453	0.727149
Autophagy related 7_A0A3P9C8W1;A0A3P9C8X3	-0.0582823	0.0140386	-0.0723209	0.516669	0.858805	0.149493
3-hydroxyisobutyrate dehydrogenase_A0A3P9C8X0	0.0522998	0.173144	-0.120845	0.465043	0.0167101	0.124287
Vesicle trafficking 1_A0A3P9C903;A0A3P9C9L8	0.096372	0.103354	-0.00698187	0.353282	0.22007	0.907633
Uncharacterized LOC101478526_A0A3P9C929;A0A3P9C915	-0.0859448	-0.0244902	-0.0614545	0.501775	0.86643	0.750934
6-phosphogluconolactonase_A0A3P9C920	-0.0588563	0.0171335	-0.0759898	0.457936	0.783964	0.207403
Disintegrin and metalloproteinase domain-containing protein 10_A0A3P9C924	-0.144182	-0.133769	-0.0104133	0.0027614	0.0394942	0.820486
Ubiquitin carboxyl-terminal hydrolase_A0A3P9C956;A0A3P9C967	0.11515	0.0991769	0.0159727	0.405835	0.181745	0.894765
Very-long-chain 3-oxoacyl-CoA reductase-B_A0A3P9C9V3;A0A3P9C960	-0.0815856	0.0235991	-0.105185	0.199178	0.688841	0.0162517
Syntaxin binding protein 2_A0A3P9C965	-0.0409874	0.0170605	-0.0580479	0.2581	0.634656	0.256324
Laminin subunit gamma 1_A0A3P9C9B1	0.111562	0.0972206	0.0143418	0.259109	0.404653	0.84536
Isoleucyl-tRNA synthetase_A0A3P9C9G4;A0A3P9C9E0	-0.0141459	0.0626426	-0.0767885	0.66375	0.249044	0.197736
Plastin-3_A0A3P9C9E2	-0.0640575	-0.0287064	-0.0353511	0.174774	0.635541	0.554284
AP-1 complex subunit gamma_A0A3P9C9F7	0.000273778	0.01517	-0.0148962	0.993396	0.678615	0.728991
Arf-GAP with dual PH domain-containing protein 1_A0A3P9C9F8	0.132516	0.102242	0.0302738	0.156091	0.155957	0.61867
Aldo-keto reductase family 7 like_A0A3P9C9I0	0.224307	0.281262	-0.0569549	0.061866	0.0100728	0.464428
TNF receptor-associated factor_A0A3P9C9K6	-0.19619	-0.167807	-0.0283825	0.0931292	0.108111	0.705806
Ras-related protein Rab-1A_A0A3P9C9M0	-0.00749011	0.0339629	-0.041453	0.733998	0.343323	0.30891
Uncharacterized protein_A0A3P9C9M5;A0A3P9C9T7;A0A3P9C9N4;A0A3P9C8P9	0.185978	0.269969	-0.0839919	0.453378	0.201392	0.724918
Eukaryotic translation initiation factor 5A_A0A3P9C9M8	-0.0427531	0.0310587	-0.0738118	0.711516	0.756334	0.250261
Actin, cytoplasmic_A0A3P9CA82;A0A3P9C9Q6	-0.274558	-0.303989	0.0294313	0.157753	0.0343406	0.857143
Peroxiredoxin like 2B_A0A3P9C9S6	0.118091	0.281475	-0.163384	0.0292449	0.00307231	0.00616966
Epoxide hydrolase 2_A0A3P9C9W2	0.0217086	0.108478	-0.0867693	0.868186	0.348617	0.412868
Maillard deglycase_A0A3P9C9X2	0.148404	0.213342	-0.0649379	0.487545	0.155739	0.712183
Drebrin-like protein A_A0A3P9C9Y4	0.0567693	0.173317	-0.116548	0.472357	0.00715118	0.11031
DNA-(apurinic or apyrimidinic site) endonuclease_A0A3P9C9Z0	0.160398	0.158765	0.00163295	0.249698	0.0716687	0.990193
60S ribosomal protein L13_A0A3P9CA04	-0.080714	-0.142832	0.062118	0.52757	0.0935191	0.614236
CCR4-NOT transcription complex subunit 9_A0A3P9CA29	-0.0799856	-0.137923	0.0579377	0.50155	0.109201	0.668563
Serine/threonine-protein phosphatase_A0A3P9D9U0;A0A3P9CA60;A0A3P9CAQ3	-0.301905	-0.162291	-0.139614	0.0063213	0.0509493	0.205127
Transglutaminase 1_A0A3P9CAA0	-0.426901	-0.42791	0.00100845	0.00512584	0.00359882	0.988169
GTP:AMP phosphotransferase AK3, mitochondrial_A0A3P9CAB9	0.0951679	0.133686	-0.038518	0.169768	0.0987142	0.46459
HIV-1 Tat interactive protein 2_A0A3P9CAG7;A0A3P9CB97	-0.107091	-0.0841685	-0.0229228	0.293244	0.548373	0.893801
Laminin subunit gamma 2_A0A3P9CAI1	0.238383	-0.132486	0.370869	0.594608	0.49974	0.456612
Peptidylprolyl isomerase_A0A3P9CAK0	0.22304	0.0770032	0.146036	0.221073	0.653217	0.128557
Lysine--tRNA ligase_A0A3P9CAN6;A0A3P9CBA5	-0.0920588	-0.0767058	-0.0153529	0.0576214	0.102007	0.544852
Polypyrimidine tract-binding protein 1_A0A3P9CAT5;A0A3P9CAB3	-0.0360376	0.0153997	-0.0514373	0.685108	0.810673	0.441553
Versican a_A0A3P9CAZ3	1.85994	1.35413	0.505813	0.0107163	0.0697721	0.198666
Cysteine rich protein 1_A0A3P9CB22	0.0127016	0.360805	-0.348103	0.921067	0.000182007	0.0226236
Complement C3-like_A0A3P9CB47	1.51741	1.35459	0.162814	0.00876376	0.002705	0.469873
Complement C6_A0A3P9CBB9	1.66684	1.52063	0.146203	0.000538179	0.00168583	0.310737
Kunitz-type protease inhibitor 1_A0A3P9CBD9	-0.127865	-0.157133	0.0292674	0.0154109	0.0156197	0.299391
MAM domain containing 2_A0A3P9CBE4	0.764087	0.413481	0.350605	0.0186648	0.304393	0.251123
Tight junction protein 2_A0A3P9CBK6;A0A3P9CBJ4	-0.180981	-0.130141	-0.0508404	0.00854363	0.132241	0.496141
Proteasome 26S subunit, ATPase 6_A0A3P9CBL8;A0A3P9CCE0;A0A3P9CBK7	-0.0851716	-0.0416024	-0.0435692	0.11168	0.0882649	0.379481
Dyskerin pseudouridine synthase 1_A0A3P9CBQ9	0.155644	0.133215	0.0224292	0.00884564	0.00723375	0.324427
Uncharacterized protein_A0A3P9CBR0	0.149737	0.329372	-0.179634	0.0835331	0.0183701	0.106219
Ig-like domain-containing protein_A0A3P9CBS2	0.14608	0.382867	-0.236788	0.379533	0.0417918	0.226362
Versican_A0A3P9CBS3	1.95175	1.41611	0.53564	0.00701501	0.0811785	0.175133
Annexin_A0A3P9CBV7	-0.769656	-0.497101	-0.272556	0.0045816	0.0202915	0.0584533
Lymphatic vessel endothelial hyaluronan receptor 1_A0A3P9CBX9	1.96359	1.23116	0.732427	0.0461168	0.0137713	0.165274
Hyaluronan and proteoglycan link protein 1_A0A3P9CC29	1.90634	1.55634	0.35	0.0402768	0.0585893	0.448752
Abhydrolase domain containing 14B_A0A3P9CC32	0.156145	0.308338	-0.152193	0.409944	0.0825314	0.299963
Aspartate aminotransferase_A0A3P9CC94;A0A3P9DSK5;A0A3P9CCA4	-0.171084	-0.0849308	-0.0861528	0.0339183	0.119669	0.161227
Collagen type V alpha 2 chain_A0A3P9CC97	0.101439	0.149668	-0.0482286	0.510417	0.326794	0.246101
Proteasome 26S subunit, ATPase 5_A0A3P9CCB7	-0.0991729	-0.0493909	-0.0497821	0.0323794	0.180577	0.2001
TAR DNA-binding protein 43_A0A3P9C764;A0A3P9C771;A0A3P9CCD8	-0.0558297	-0.0938312	0.0380015	0.343272	0.0577309	0.538367
Leukotriene A(4) hydrolase_A0A3P9CCG2;A0A3P9CCX2	0.180804	0.0703706	0.110433	0.254767	0.35863	0.485085
Importin 7_A0A3P9CCP4	-0.0944495	-0.0616473	-0.0328022	0.271587	0.386479	0.674851
Phosphoacetylglucosamine mutase_A0A3P9CCS2	-0.0777761	-0.0490665	-0.0287097	0.286444	0.467224	0.718489
DNA damage inducible 1 homolog 2_A0A3P9CDV7;A0A3P9CCS5	0.0579718	0.0397257	0.0182461	0.0102528	0.32711	0.638495
Enoyl-CoA hydratase_A0A3P9CE10;A0A3P9CCS6	-0.121637	-0.0927289	-0.0289079	0.06688	0.157999	0.639236
Protein Z-dependent protease inhibitor_A0A3P9CCS7;A0A3P9CCB4	0.732714	0.732603	0.000110621	0.00124878	0.00040344	0.99891
Delta-aminolevulinic acid dehydratase_A0A3P9CCT8;A0A3P9CC07	0.0256642	0.101872	-0.0762079	0.622793	0.0963228	0.104634
Quinone oxidoreductase_A0A3P9CCU3	0.015034	0.0550818	-0.0400478	0.946651	0.783682	0.78555
Uncharacterized protein_A0A3P9CCV2	0.0159511	0.309703	-0.293752	0.866269	0.0221381	0.0421043
Histone H2A_A0A3P9BSU6;A0A3P9CCW1;A0A3P9CWW5;A0A3P9CVR6	0.0867063	0.0940276	-0.00732129	0.389638	0.208366	0.920492
Ig-like domain-containing protein_A0A3P9CCY2	0.101679	0.219253	-0.117574	0.607007	0.0981437	0.535255
Complex I-23kD_A0A3P9CDL2;A0A3P9CD40	-0.15766	-0.089965	-0.0676954	0.0914323	0.219211	0.451794
Glycerol-3-phosphate dehydrogenase [NAD(+)]_A0A3P9DJH6;A0A3P9CD45	-0.329286	-0.232334	-0.0969524	0.0847173	0.141498	0.636161
Pre-mRNA processing factor 8_A0A3P9CD99	-0.0909858	-0.0495263	-0.0414595	0.166546	0.270722	0.464412
Macrophage stimulating 1_A0A3P9CDB0	1.09047	0.988184	0.102288	0.00116215	0.000204063	0.294713
Actin-related protein 3_A0A3P9CDC2;A0A3P9C6R5	-0.107635	-0.0964216	-0.0112129	0.101592	0.213481	0.891347
Uncharacterized LOC101478366_A0A3P9CDE6	0.0756758	-0.0250508	0.100727	0.886088	0.954889	0.866137
Guanine nucleotide-binding protein G(I)/G(S)/G(T) subunit beta-1_A0A3P9CDI4;A0A3P9D294	-0.0629831	0.000136523	-0.0631196	0.504956	0.997976	0.523114
Lissencephaly-1 homolog_A0A3P9CDP4;A0A3P9CDQ2	0.134962	0.0981509	0.0368115	0.222153	0.0807017	0.677622
Niban-like protein 1_A0A3P9CDQ9	-0.229181	-0.0813637	-0.147817	0.0114041	0.403828	0.186488
Coronin_A0A3P9CDR2;A0A3P9CEV7	-0.198671	-0.131844	-0.0668277	0.000356605	0.0317068	0.23967
ADP-ribosylation factor 4_A0A3P9CDS0;A0A3P9CCK2	0.187263	0.197755	-0.010492	0.0315674	0.034295	0.692892
Lamina-associated polypeptide 2-like_A0A3P9CDT2	0.135548	0.114319	0.021229	0.15714	0.0769127	0.779674
ATP-dependent RNA helicase DDX1_A0A3P9CDU3	0.0673225	0.0167306	0.0505919	0.321263	0.681134	0.379941
Retinol binding protein 4_A0A3P9CDV3	1.30741	1.17524	0.132173	0.0186171	0.0343194	0.670201
Glutathione peroxidase 2_A0A3P9CDZ7	0.0708166	0.111936	-0.0411191	0.531749	0.0645151	0.686628
Anamorsin_A0A3P9CE05	-0.10436	0.0713801	-0.17574	0.462875	0.608168	0.206598
Nudix hydrolase 5_A0A3P9CE22	-0.157904	-0.182227	0.0243229	0.305757	0.205144	0.841967
Actin-related protein 2/3 complex subunit 5_A0A3P9CE70	-0.0189374	-0.017094	-0.00184338	0.638566	0.662305	0.964622
Malate dehydrogenase_A0A3P9CE82;A0A3P9CEW9;A0A3P9CE86	-0.0532215	0.0651471	-0.118369	0.496559	0.329544	0.136516
Protein S100_A0A3P9CE84	0.34477	0.329743	0.0150264	0.0242092	0.0745426	0.917105
STEAP4 metalloreductase_A0A3P9CEA2	0.239967	0.26045	-0.0204833	0.311256	0.257869	0.928944
Dpy-30 histone methyltransferase complex regulatory subunit_A0A3P9CEB9	0.431307	0.18339	0.247917	0.104273	0.514128	0.420776
SEC63 homolog, protein translocation regulator_A0A3P9CEE1;A0A3P9CE52	0.347643	0.212515	0.135128	0.0014545	0.00199508	0.0179518
Tubulin alpha chain_A0A3P9BTJ6;A0A3P9CEL8	-0.0318436	0.0366831	-0.0685267	0.619296	0.438668	0.165637
Protein S100-A6_A0A3P9CEM6	-0.0108413	0.244607	-0.255449	0.942187	0.0750128	0.113994
Septin_A0A3P9CEM7;A0A3P9CEN7	0.122624	0.0771126	0.0455114	0.196502	0.356406	0.62815
Methylcrotonoyl-CoA carboxylase 1_A0A3P9CEM8	-0.0551808	0.0586364	-0.113817	0.445207	0.250463	0.129696
Desmoglein-2_A0A3P9CF32;A0A3P9CES6	-0.292176	-0.31435	0.0221745	0.0141331	0.0144694	0.757255
4-alpha-glucanotransferase_A0A3P9CFC4;A0A3P9CES3;A0A3P9CES7	0.216733	0.238953	-0.0222197	0.0718518	0.0189231	0.749455
Glycerol-3-phosphate dehydrogenase, mitochondrial_A0A3P9CEV4	-0.00860979	-0.0131806	0.00457082	0.926391	0.861549	0.964538
Supervillin_A0A3P9CEY6	0.0383958	0.0230301	0.0153657	0.53868	0.668346	0.795358
RNA polymerase II subunit C_A0A3P9CEZ8	-0.114569	-0.00129437	-0.113274	0.115548	0.978982	0.125234
BRICK1 subunit of SCAR/WAVE actin nucleating complex_A0A3P9CUK3;A0A3P9CF24	0.186603	0.0377737	0.148829	0.0555036	0.684768	0.0457325
Desmoglein-2_A0A3P9CF32	-0.0480331	-0.0419604	-0.00607268	0.697245	0.738376	0.951861
Septin_A0A3P9CF80;A0A3P9CEM7;A0A3P9CEN7;A0A3P9CF55	0.0290054	0.0278337	0.00117169	0.691377	0.324096	0.986863
Complex I-30kD_A0A3P9CF75;A0A3P9CF68	-0.108288	-0.0310824	-0.0772058	0.0493329	0.467861	0.113648
Olfactomedin-like domain-containing protein_A0A3P9CF81;A0A3P9CFW1	0.567272	0.188488	0.378784	0.131352	0.306563	0.251461
Unconventional myosin-Ic_A0A3P9CFB4;A0A3P9CG27;A0A3P9CFD6	0.443018	0.404497	0.0385212	0.014673	0.0435837	0.731226
Olfactomedin-like_A0A3P9DK96;A0A3P9CFC1;A0A3P9CFK4;A0A3P9CFN1;A0A3P9CFJ7	0.507256	0.113334	0.393922	0.147053	0.563655	0.239861
Aldehyde oxidase 1_A0A3P9CFC3	0.211435	0.223176	-0.0117402	0.118492	0.24814	0.925293
Actin-depolymerizing factor_A0A3P9CFD2;A0A3P9CFC6;A0A3P9CFN3	0.111975	0.289313	-0.177337	0.527072	0.109161	0.0407128
Uncharacterized LOC101484154_A0A3P9CFC9	1.1017	1.16762	-0.0659218	0.305644	0.241996	0.93471
Serine/threonine-protein phosphatase 2A 55 kDa regulatory subunit B_A0A3P9CFW9;A0A3P9CFE8	-0.029609	0.00991346	-0.0395224	0.657404	0.863703	0.61355
Uncharacterized protein_A0A3P9CFF3	0.21742	0.0546524	0.162768	0.19264	0.538592	0.271632
Laminin subunit alpha 4_A0A3P9CFL7	0.170585	0.222537	-0.0519514	0.158693	0.127021	0.465863
Uncharacterized protein_A0A3P9CFP7	0.532181	0.0909871	0.441194	0.211278	0.61212	0.279039
ELAV-like protein_A0A3P9CFU8	-0.0432436	-0.040745	-0.00249857	0.516731	0.487534	0.970843
Ribosomal protein L19_A0A3P9D9H1;A0A3P9CFX6	0.0417543	0.0256968	0.0160575	0.839034	0.839807	0.940566
Metallothionein_A0A3P9CFX8	0.256412	0.0701526	0.18626	0.460701	0.628595	0.587039
40S ribosomal protein S27_A0A3P9CFZ1;A0A3P9D731;A0A3P9DM68;A0A3P9D7S9	-0.325543	-0.278458	-0.0470847	0.0155669	0.0261117	0.679564
Collagen type XVIII alpha 1 chain_A0A3P9CG24;A0A3P9CHD2;A0A3P9CGE2;A0A3P9CGW2	0.132161	-0.0545142	0.186675	0.423482	0.480832	0.275236
Protein phosphatase 2 scaffold subunit Abeta_A0A3P9CG33	-0.179359	-0.100016	-0.0793434	0.0211785	0.138886	0.237682
Copine 8_A0A3P9CPC1;A0A3P9BEP8;A0A3P9CPB2;A0A3P9CKX8;A0A3P9BEA6;A0A3P9CQB6;A0A3P9BE73;A0A3P9CG38;A0A3P9CM63;A0A3P9CK91;A0A3P9CKU6;A0A3P9CK51;A0A3P9CRD4;A0A3P9CQD9;A0A3P9CM01;A0A3P9C4A2;A0A3P9D4C4;A0A3P9CAS3;A0A3P9BWD5;A0A3P9CMM3;A0A3P9CKB9;A0A3P9BEU7;A0A3P9CPW4	0.0923687	0.205759	-0.113391	0.588087	0.188281	0.51963
Basic leucine zipper and W2 domain-containing protein 1-A_A0A3P9CG63;A0A3P9CGP3	-0.186305	-0.264877	0.0785717	0.456221	0.129751	0.770216
Histidine-rich glycoprotein-like_A0A3P9CG69	1.95316	1.87152	0.0816421	0.0107562	0.0316103	0.810346
Arpin_A0A3P9CGB4	-0.0617604	0.0606839	-0.122444	0.460102	0.395967	0.196646
Aminopeptidase_A0A3P9CGC4	0.398594	0.373123	0.0254714	0.116616	0.142862	0.914016
Guanine nucleotide-binding protein G(o) subunit alpha_A0A3P9CGT8;A0A3P9CDK6;A0A3P9C569;A0A3P9BGT9;A0A3P9B0U8;A0A3P9CGE9;A0A3P9CUZ4;A0A3P9BT37;A0A3P9C6B2	-0.0249218	0.0235392	-0.048461	0.810764	0.799224	0.639104
Fetuin-B-like_A0A3P9CGG1	1.12494	1.04755	0.077392	0.0057367	0.0013867	0.620001
Tetraspanin_A0A3P9CGG7	-0.047613	0.686323	-0.733936	0.739148	0.00982792	0.0133793
Ubiquitin carboxyl-terminal hydrolase_A0A3P9CGK5	0.0888028	0.103209	-0.0144066	0.105001	0.119048	0.791534
Phosphate carrier protein, mitochondrial_A0A3P9CGN7	-0.130134	-0.0619966	-0.0681373	0.255386	0.597764	0.417243
WD repeat domain 5_A0A3P9CGP4	0.193924	0.0759254	0.117998	0.00621956	0.149043	0.0679756
Cellular retinoic acid-binding protein 2_A0A3P9CGS2	0.17348	0.0983582	0.0751216	0.109853	0.386518	0.272832
Dihydropyrimidinase-related protein 2_A0A3P9CGA9;A0A3P9CGT1	0.427496	0.706619	-0.279123	0.0291524	0.0022151	0.0379283
40S ribosomal protein S23_A0A3P9CGU2;A0A3P9CHJ7	-0.148271	-0.133253	-0.0150177	0.0599306	0.0578507	0.676082
Non-muscle caldesmon_A0A3P9CGV6	0.00178796	0.275078	-0.27329	0.992525	0.0986623	0.137401
Metavinculin_A0A3P9CGX2	0.243807	0.162902	0.080905	0.0254737	0.0116946	0.321593
L-lactate dehydrogenase_A0A3P9CH04	0.0519463	0.114475	-0.0625283	0.672623	0.264211	0.62339
ADAMTS-like protein 4_A0A3P9CH11	0.182097	0.375841	-0.193745	0.101779	0.0213102	0.148392
IQ motif containing GTPase activating protein 1_A0A3P9CH36	0.0465633	0.078252	-0.0316886	0.0863605	0.0750043	0.309384
Serine/threonine kinase receptor associated protein_A0A3P9CH58	0.0193597	0.0294529	-0.0100932	0.491116	0.417367	0.795039
Pyruvate kinase_A0A3P9CH80;A0A3P9CHI8	-0.102017	0.0160136	-0.11803	0.283743	0.878529	0.197757
Dihydrolipoyl dehydrogenase_A0A3P9CH84;A0A3P9CHK6	0.0812687	0.1326	-0.0513318	0.184394	0.0565417	0.485453
Ribosomal protein L18_A0A3P9CH92;A0A3P9CH95	-0.0364304	0.0394823	-0.0759127	0.695546	0.604575	0.43652
Caveolae-associated protein 2_A0A3P9CH93	-0.244726	-0.104719	-0.140007	0.0541339	0.363967	0.112476
Cytochrome c1, heme protein, mitochondrial_A0A3P9CHD8	-0.0752827	0.0178113	-0.093094	0.309218	0.775613	0.216791
Phosphate carrier protein, mitochondrial_A0A3P9CHE6	-0.101059	-0.0902902	-0.0107693	0.111653	0.112562	0.805234
CCR4-NOT transcription complex subunit 1_A0A3P9CHJ4	0.240441	0.217533	0.0229078	0.0661662	0.126967	0.87079
Ras suppressor protein 1_A0A3P9CHM2;A0A3P9CI18	0.16873	0.173506	-0.00477622	0.0655415	0.0393119	0.945946
Si:busm1-57f23.1_A0A3P9CHQ2	0.0662538	0.0937304	-0.0274766	0.386103	0.224991	0.533262
Cytochrome P450 2J2_A0A3P9CHI6;A0A3P9CHW2;A0A3P9CCU0;A0A3P9CSU9;A0A3P9CJ09;A0A3P9CIH4;A0A3P9CTV2;A0A3P9CIJ8;A0A3P9CSN9;A0A3P9CIS5;A0A3P9CJE2;A0A3P9CJQ7;A0A3P9CID3;A0A3P9CEL3;A0A3P9CRH8;A0A3P9C7G5;A0A3P9CSV4;A0A3P9CHZ2;A0A3P9CIU1;A0A3P9CTX6	0.341912	0.639189	-0.297277	0.188027	0.0176276	0.0968301
Myosin-10_A0A3P9CHW4	-0.12304	-0.0575227	-0.0655173	0.0975574	0.318047	0.406619
Interferon-induced protein 44-like_A0A3P9CHW7	0.0411721	0.111738	-0.0705661	0.789041	0.383048	0.59536
SH3 domain-binding glutamic acid-rich-like protein_A0A3P9CHX5	-0.425501	-0.409539	-0.0159614	0.0228712	0.0222669	0.806219
Junctional adhesion molecule 1_A0A3P9CHX9	-0.427574	-0.25024	-0.177333	0.00611629	0.0357508	0.0395883
Mannose-1-phosphate guanyltransferase beta_A0A3P9CHY5;A0A3P9DTM2	-0.0993889	-0.0977019	-0.00168699	0.137283	0.229009	0.981001
40S ribosomal protein S12_A0A3P9CIH7;A0A3P9CHY9	-0.177304	-0.193939	0.0166354	0.00419119	0.00343065	0.613062
Filamin B_A0A3P9CHZ6	-0.0219434	0.0520718	-0.0740152	0.77454	0.612111	0.513853
Cathepsin D_A0A3P9CI02	-0.124193	-0.268074	0.143881	0.696914	0.142647	0.684279
Complement C1q subcomponent subunit C_A0A3P9CI85	0.559691	0.42256	0.137131	0.186901	0.0883719	0.692078
Protein phosphatase 1F_A0A3P9B7L3;A0A3P9B7B6;A0A3P9CI91	0.384725	0.527649	-0.142924	0.024591	0.01113	0.323899
Ras-related protein Rab-5A_A0A3P9BA06;A0A3P9CI95	0.129849	0.160408	-0.0305588	0.0780296	0.00705882	0.561186
Propionate--CoA ligase_A0A3P9CID9;A0A3P9CJR3	0.40452	0.349166	0.0553532	0.0099569	0.00543778	0.486309
Caspase-1-A_A0A3P9CIF3	0.173331	0.260815	-0.0874844	0.179058	0.0196547	0.308769
Interferon-induced protein 44_A0A3P9CIG1;A0A3P9CIF7	-0.339746	-0.352423	0.0126774	0.07376	0.082654	0.906449
RNA-binding protein 8A_A0A3P9CIF8	-0.0217522	-0.0924699	0.0707177	0.770185	0.280474	0.20837
Charged multivesicular body protein 4b_A0A3P9CIG6	0.159148	0.133444	0.0257041	0.054615	0.0619926	0.427357
Engulfment and cell motility 3_A0A3P9CIH2;A0A3P9CF90;A0A3P9CIH9	-0.125993	-0.0411153	-0.0848775	0.0271708	0.32138	0.127437
Complement C1q subcomponent subunit C-like_A0A3P9CIN4	0.569729	0.403728	0.166001	0.18014	0.107177	0.636123
Isochorismatase domain containing 2_A0A3P9CIN7	-0.238678	-0.0708845	-0.167793	0.0214568	0.256371	0.00851325
Protein-glutamine gamma-glutamyltransferase E_A0A3P9CIQ2;A0A3P9CJ47	-0.667689	-0.350262	-0.317427	0.0200891	0.0771158	0.0294075
Translocase of outer mitochondrial membrane 34_A0A3P9CIR8	0.0202323	0.0231247	-0.00289242	0.777369	0.642917	0.968921
Mitochondrial glutamate carrier 1_A0A3P9CIT5	0.585642	0.573596	0.0120465	0.0101462	0.0257021	0.935731
Latexin_A0A3P9CJ83;A0A3P9CIU4;A0A3P9CJ93	0.850623	0.826765	0.0238578	0.00156695	4.31382e-05	0.751786
Ciliary neurotrophic factor receptor_A0A3P9CIV3	0.296617	0.17862	0.117997	0.0424471	0.0980796	0.285617
Complement factor H_A0A3P9CI19;A0A3P9CI13;A0A3P9CIW0	0.769675	0.694482	0.0751932	0.000271999	0.0126511	0.528071
U2 snRNP auxiliary factor large subunit_A0A3P9CIW1;A0A3P9D9A5;A0A3P9CJ88	-0.0372814	-0.0387241	0.00144263	0.554032	0.421796	0.975416
26S proteasome non-ATPase regulatory subunit 13_A0A3P9CIZ5;A0A3P9CIL9	0.0172657	0.058567	-0.0413013	0.729576	0.0765721	0.439379
NADH:ubiquinone oxidoreductase subunit A9_A0A3P9CJ12	0.000875263	-0.0410812	0.0419564	0.98543	0.279851	0.285704
40S ribosomal protein S9_A0A3P9CJ20	-0.0377462	-0.0688514	0.0311052	0.61673	0.262293	0.718311
Complement C1q subcomponent subunit A_A0A3P9CJ36;A0A3P9CJM5	0.520772	0.420732	0.10004	0.146468	0.0544847	0.725373
Regulator of nonsense transcripts 1_A0A3P9CJ60;A0A3P9B432	0.00699451	-0.0251611	0.0321556	0.955359	0.762479	0.831453
Protein-glutamine gamma-glutamyltransferase E_A0A3P9CJ62	-1.30809	-0.995215	-0.312877	0.000257887	0.000526532	0.148799
14-3-3 protein beta/alpha-A_A0A3P9CJ73	-0.0941061	-0.0521405	-0.0419656	0.424095	0.361867	0.69377
Sorting nexin_A0A3P9CK72;A0A3P9CJA5;A0A3P9CJD9	0.114257	0.118314	-0.00405624	0.185041	0.142197	0.910641
Nuclear distribution protein C homolog_A0A3P9CJE3	0.036072	0.0800963	-0.0440243	0.575026	0.0620984	0.488375
Calpain-1 catalytic subunit_A0A3P9CJW0;A0A3P9CJH7	0.281614	0.0974596	0.184155	0.418701	0.727846	0.629543
SH3 domain-binding glutamic acid-rich-like protein 3_A0A3P9CJI3	-0.0271085	-0.0165756	-0.0105329	0.699002	0.80103	0.868836
Cysteinyl-tRNA synthetase_A0A3P9CJJ2;A0A3P9CKB4;A0A3P9CJL9	-0.0141215	-0.00627468	-0.00784679	0.887475	0.942594	0.929967
Dipeptidyl peptidase 9_A0A3P9CJJ8	-0.0607091	0.0265838	-0.0872929	0.184094	0.556928	0.051518
U6 snRNA-associated Sm-like protein LSm3_A0A3P9CJP3	0.10918	-0.283793	0.392974	0.594309	0.251623	0.0563009
Adenosylhomocysteinase_A0A3P9CJS8	-0.132392	-0.101908	-0.0304834	0.0794855	0.159021	0.466438
Tubulin folding cofactor B_A0A3P9CJT6	0.310817	0.435569	-0.124752	0.118774	0.0352356	0.296722
Spectrin beta chain_A0A3P9CJV0	0.0675429	0.0554268	0.012116	0.253761	0.423611	0.787324
Leukocyte elastase inhibitor_A0A3P9CJV4	-0.0659574	-0.0230591	-0.0428983	0.576748	0.886148	0.824229
Transitional endoplasmic reticulum ATPase_A0A3P9B7H9;A0A3P9CJX4	-0.0493861	-0.0244362	-0.0249499	0.339913	0.488606	0.639234
Cortactin_A0A3P9CJX9	-0.00112542	-0.0150446	0.0139191	0.968027	0.55842	0.708062
Short chain dehydrogenase/reductase family 16C member 5_A0A3P9CKI0;A0A3P9CJY3	0.181807	0.211406	-0.0295995	0.018938	0.237207	0.841757
Acidic (leucine-rich) nuclear phosphoprotein 32 family, member E_A0A3P9CK00	-0.165062	-0.0778716	-0.0871903	0.157026	0.561472	0.572829
Complex I-20kD_A0A3P9CK65	-0.0694451	-0.100743	0.0312981	0.62071	0.578419	0.801473
Exocyst complex component 2_A0A3P9CK94	0.0684627	0.0562015	0.0122612	0.240283	0.149224	0.763865
Ribosomal protein L15_A0A3P9CKB3	-0.100192	-0.0988621	-0.00132984	0.269368	0.297908	0.977731
Copine 3_A0A3P9CKX8;A0A3P9CKB9	0.127065	0.170813	-0.043748	0.508668	0.316574	0.836662
Succinate-semialdehyde dehydrogenase_A0A3P9CKC7	0.214843	0.29533	-0.0804869	0.0298564	0.00172586	0.169345
Cytochrome c oxidase subunit_A0A3P9CKE8	0.112762	-0.212748	0.32551	0.455845	0.200711	0.0515611
Neurofilament light polypeptide_A0A3P9DJN4;A0A3P9D8X2;A0A3P9DPS9;A0A3P9BSZ7;A0A3P9BSZ6;A0A3P9AU13;A0A3P9CKG8;A0A3P9DMW8;A0A3P9D5P9;A0A3P9DDJ1	-0.119538	-0.107627	-0.0119111	0.203574	0.0149311	0.892589
Mimecan_A0A3P9CKJ3	-0.549147	-0.151192	-0.397956	0.0795275	0.572393	0.310791
Asporin_A0A3P9CKJ7	0.817047	0.851792	-0.0347448	0.0116315	0.0250591	0.86884
Desmoplakin_A0A3P9CKK6	-0.136663	-0.240658	0.103995	0.00793969	0.0492849	0.323736
Uncharacterized protein_A0A3P9CQJ1;A0A3P9CQH4;A0A3P9CKL8;A0A3P9CQL2;A0A3P9CQI0;A0A3P9CS12;A0A3P9CQL7;A0A3P9CRC3;A0A3P9CRZ3	0.785134	0.614061	0.171072	0.0112251	0.0885165	0.457675
ATP-dependent 6-phosphofructokinase_A0A3P9CKM0;A0A3P9CLY1	0.414045	0.25088	0.163165	0.00144796	0.00779805	0.0442156
Calcium-transporting ATPase_A0A3P9CM94;A0A3P9CKT0;A0A3P9CKQ8	-0.0505612	0.0493264	-0.0998877	0.427761	0.496746	0.0859601
Eukaryotic translation elongation factor 1 delta_A0A3P9CKR0	-0.122146	-0.162234	0.0400882	0.00948048	0.0225428	0.370247
Clustered mitochondria protein homolog_A0A3P9CKS3	0.0313891	-0.0714557	0.102845	0.872611	0.639983	0.620112
TraB domain containing_A0A3P9CKU5	0.0959262	-0.0290662	0.124992	0.202488	0.757612	0.151645
Cofilin 2_A0A3P9CKU8;A0A3P9BAI9	-0.0172651	0.01602	-0.033285	0.813425	0.752281	0.567609
Splicing factor 3a subunit 3_A0A3P9CKW3	0.0276225	0.0135277	0.0140948	0.491481	0.762266	0.743266
Proteasome subunit alpha type_A0A3P9CLS2;A0A3P9CKY7	-0.116558	0.00267276	-0.11923	0.0351534	0.955014	0.0915703
Sarcosine dehydrogenase_A0A3P9CKY8	0.0117667	-0.0116002	0.0233668	0.920864	0.911801	0.72701
Heme-binding protein 2_A0A3P9CKZ1	0.241223	0.314472	-0.0732488	0.172963	0.100068	0.616151
Glutathione peroxidase_A0A3P9CKZ7	0.243204	0.0929688	0.150235	0.217779	0.675923	0.288738
Ras-related protein Rab-18_A0A3P9CL08;A0A3P9CL10	0.115255	0.0626482	0.0526067	0.251839	0.43503	0.533884
MICOS complex subunit MIC60_A0A3P9CLT4;A0A3P9CL32	0.0704098	0.111877	-0.0414676	0.375063	0.0766566	0.61705
Alpha-1-microglobulin_A0A3P9CL37	0.71675	0.692377	0.0243738	0.0224123	0.0111663	0.893498
Importin 4_A0A3P9CL55	-0.00849503	-0.139914	0.131419	0.964296	0.142634	0.54902
Metalloendopeptidase_A0A3P9DTX0;A0A3P9DUY6;A0A3P9DV21;A0A3P9DUE1;A0A3P9DTW5;A0A3P9DV30;A0A3P9DUJ4;A0A3P9DUF3;A0A3P9DUH8;A0A3P9DUI7;A0A3P9DV90;A0A3P9DUE4;A0A3P9DUE8;A0A3P9CL66	1.18576	0.748881	0.43688	0.0890541	0.0403927	0.320364
Low molecular weight cytosolic acid phosphatase_A0A3P9CL78	-0.190094	-0.216657	0.0265636	0.0349586	0.00353415	0.681241
Leukocyte elastase inhibitor-like_A0A3P9CJT2;A0A3P9CL36;A0A3P9CL81;A0A3P9CKH3;A0A3P9CKM3	-0.0494485	0.0450135	-0.094462	0.535544	0.491763	0.0825525
Programmed cell death 6_A0A3P9CL85	0.160204	0.0400159	0.120188	0.038911	0.357869	0.120802
Eukaryotic translation elongation factor 1 epsilon 1_A0A3P9CL96	-0.0204529	-0.0351896	0.0147367	0.56052	0.634491	0.85094
Annexin_A0A3P9CLZ5;A0A3P9CLA6	0.0528483	0.136817	-0.0839689	0.522684	0.206009	0.497097
ADP/ATP translocase_A0A3P9D6N5;A0A3P9BBP2;A0A3P9BBD3;A0A3P9CLA2;A0A3P9D7Z0;A0A3P9CLA7	-0.212563	-0.227038	0.0144755	0.0110673	0.00445962	0.79303
Pyruvate dehydrogenase E1 component subunit beta_A0A3P9CLC4	0.0664391	0.141301	-0.0748619	0.449753	0.0222426	0.414867
Choline-specific glycerophosphodiester phosphodiesterase_A0A3P9CLE9	0.60518	0.737364	-0.132184	0.0854326	0.045803	0.490719
Collagen alpha-6(VI) chain_A0A3P9CLG8	0.07994	-0.109009	0.188949	0.678565	0.555891	0.130735
GDP-D-mannose dehydratase_A0A3P9CLK6	-0.210842	-0.143415	-0.0674273	0.0839881	0.144577	0.306314
Copine-1_A0A3P9CLM3;A0A3P9CKZ3	0.0217884	0.0450355	-0.0232471	0.835026	0.56873	0.813817
Transmembrane protein 14C_A0A3P9CMC3;A0A3P9CLM5	0.221961	0.371775	-0.149814	0.0168079	0.0226677	0.221779
Thrombospondin-4-B_A0A3P9CMB8;A0A3P9CLN9	-0.0976368	0.120175	-0.217812	0.683894	0.616579	0.281883
Glutaredoxin 3_A0A3P9CLP3	-0.105497	-0.045128	-0.0603694	0.167466	0.544179	0.340923
Dihydrofolate reductase_A0A3P9CLP8	-0.400988	-0.669254	0.268266	0.315486	0.100714	0.506631
C-type lectin domain family 4 member A_A0A3P9CLR6;A0A3P9CLQ6	0.100394	0.149626	-0.0492316	0.398714	0.30123	0.529756
Histidine--tRNA ligase_A0A3P9CNA2;A0A3P9CLR8;A0A3P9CN95	0.0741684	0.0264982	0.0476702	0.25988	0.590468	0.306481
Nucleosome assembly protein 1-like 4_A0A3P9CLS1;A0A3P9CNB2	-0.0560884	-0.0111282	-0.0449602	0.582796	0.885618	0.569355
Nucleolin_A0A3P9CLT0	0.0447122	0.00472328	0.0399889	0.641178	0.956622	0.725215
AP complex subunit beta_A0A3P9CNE8;A0A3P9CLW1;A0A3P9CLY3	-0.14859	-0.111788	-0.0368018	0.0303086	0.00493696	0.464367
S100 calcium binding protein A14_A0A3P9CLY8	0.130197	0.225847	-0.0956498	0.302963	0.0763743	0.274413
Lamin A/C_A0A3P9CM07	-0.0725079	-0.08982	0.0173121	0.33732	0.0937235	0.827994
Glucosamine-6-phosphate isomerase_A0A3P9CM33	0.181824	0.202321	-0.0204965	0.202484	0.133606	0.876584
Thioredoxin domain containing 5_A0A3P9CM46	0.0220105	0.0348769	-0.0128664	0.861844	0.792907	0.841232
Mitogen-activated protein kinase_A0A3P9CM90	-0.19539	-0.0647592	-0.130631	0.0850414	0.585102	0.262425
Ras-related protein Rab_A0A3P9CMA4	0.261143	0.146939	0.114205	0.113482	0.0556849	0.427592
NADH-ubiquinone oxidoreductase 75 kDa subunit, mitochondrial_A0A3P9CMA6	-0.057264	-0.0154046	-0.0418594	0.221915	0.490029	0.295
26S proteasome AAA-ATPase subunit RPT3_A0A3P9CMD7;A0A3P9CME2	0.0426763	0.0896904	-0.0470142	0.501838	0.172813	0.445308
LAM_G_DOMAIN domain-containing protein_A0A3P9CMF1	0.0436988	-0.114831	0.15853	0.753623	0.419542	0.268034
Sorting nexin_A0A3P9CMG8	0.0242761	0.0397172	-0.0154411	0.764797	0.66367	0.863889
Apolipoprotein M_A0A3P9CMH9	0.824374	0.730946	0.093428	0.00107633	0.0193341	0.548861
Prostaglandin-H2 D-isomerase-like_A0A3P9CMK2	1.25472	1.09499	0.159731	0.00218735	9.11112e-05	0.222723
Small nuclear ribonucleoprotein Sm D3_A0A3P9CMQ4	-0.211641	-0.185296	-0.0263453	0.00183398	0.0207826	0.618415
Glycogenin-1_A0A3P9CMT7;A0A3P9CMV0;A0A3P9CNI9	-1.43782	-1.45154	0.0137228	0.0811431	0.080359	0.769605
D-beta-hydroxybutyrate dehydrogenase, mitochondrial_A0A3P9CMV5	0.270772	0.267882	0.00289068	0.22161	0.210646	0.98771
Calcium-transporting ATPase_A0A3P9CMY6;A0A3P9AZQ5;A0A3P9CMW1;A0A3P9B064;A0A3P9CPH8	-0.0986314	-0.066329	-0.0323024	0.0189455	0.171499	0.439089
Casein kinase 1 alpha 1_A0A3P9CMW5;A0A3P9CM36	-0.172463	-0.178823	0.00635954	0.0447535	0.00783003	0.909149
Phosphatidylinositide phosphatase SAC1-B_A0A3P9CMX0	-0.142247	-0.122128	-0.0201193	0.144997	0.160671	0.723846
Zyxin_A0A3P9CN04	0.435696	0.341442	0.0942542	0.00655882	0.00230331	0.294311
Cystathionine beta-synthase_A0A3P9CN11	-0.212777	-0.0913025	-0.121475	0.0513938	0.200202	0.252388
Serine/threonine-protein phosphatase_A0A3P9CN37;A0A3P9CNV8;A0A3P9BZ06	-0.0196014	0.00755355	-0.027155	0.643371	0.814055	0.517952
2-phospho-D-glycerate hydro-lyase_A0A3P9C6I0;A0A3P9D0S4;A0A3P9AWD6;A0A3P9CP19;A0A3P9CN88;A0A3P9D214;A0A3P9D0X8;A0A3P9AWL2;A0A3P9C6G0;A0A3P9C602	-0.0678788	0.0577227	-0.125601	0.35928	0.565073	0.170563
EWS RNA binding protein 1_A0A3P9CN89	-0.20831	-0.223477	0.0151665	0.0666046	0.0269278	0.838205
Trifunctional purine biosynthetic protein adenosine-3_A0A3P9CNA0	0.0493894	0.166022	-0.116633	0.149076	0.000817297	0.00639547
Sodium/potassium-transporting ATPase subunit alpha_A0A3P9CS20;A0A3P9CP58;A0A3P9CND1;A0A3P9CQK9;A0A3P9CMJ8;A0A3P9DJ37;A0A3P9CRE5;A0A3P9CEH8;A0A3P9DDW1;A0A3P9CMG7	0.0652437	0.0425952	0.0226485	0.381396	0.710532	0.836366
COesterase domain-containing protein_A0A3P9CNE7	0.549518	0.423483	0.126035	0.069875	0.106914	0.563961
Complement component 1, r subcomponent_A0A3P9CNG3	0.839828	0.766934	0.0728945	0.0378077	0.0112444	0.743208
Polypyrimidine tract-binding protein 1_A0A3P9CNH1;A0A3P9CNG6	-0.0289773	-0.112556	0.0835791	0.762861	0.289599	0.521518
CRK like proto-oncogene, adaptor protein_A0A3P9CNH5	-0.0571353	-0.0317323	-0.025403	0.602856	0.624838	0.813566
Uncharacterized protein_A0A3P9CNJ8;A0A3P9CNJ4;A0A3P9CNL3	0.838101	0.740743	0.0973583	0.0352161	0.0055052	0.623465
Complement C1s subcomponent_A0A3P9CNM1	0.756885	0.685604	0.0712805	0.13102	0.0396083	0.834174
Small monomeric GTPase_A0A3P9CNM6	-0.0383333	-0.0087064	-0.0296269	0.420428	0.637991	0.5271
ATP binding cassette subfamily F member 1_A0A3P9CNN1	0.0736705	0.0211344	0.0525361	0.574626	0.833402	0.646624
Importin 5_A0A3P9CNN7	0.0121663	0.0153743	-0.00320806	0.880385	0.749034	0.969283
Protein-tyrosine-phosphatase_A0A3P9CNQ5;A0A3P9CPL2;A0A3P9CNS1	0.239604	0.174232	0.0653721	0.092322	0.213572	0.382014
Syntaxin 12_A0A3P9CNR0	0.152101	0.141886	0.0102149	0.0508632	0.0095718	0.850966
60S ribosomal protein L35_A0A3P9CNT1;A0A3P9CPM9	0.143264	0.00869713	0.134567	0.536468	0.960331	0.616104
Cell division control protein 42 homolog_A0A3P9CNU8	-0.169697	-0.096685	-0.0730121	0.0746935	0.289398	0.411203
PHD finger protein 14_A0A3P9CP03	-0.175173	-0.297646	0.122473	0.00940389	0.0580523	0.400814
Actin-related protein 2/3 complex subunit 3_A0A3P9CP29	-0.128326	-0.119302	-0.00902478	0.104197	0.149104	0.893939
Triosephosphate isomerase_A0A3P9CP40	-0.255797	-0.136659	-0.119138	0.0208565	0.0906436	0.0344766
Profilin_A0A3P9CP41	0.0202574	0.0890966	-0.0688392	0.849125	0.341443	0.400159
Sorting nexin-3_A0A3P9CQ60;A0A3P9CPA7	0.0433361	0.0653164	-0.0219803	0.0342753	0.0324053	0.216066
COesterase domain-containing protein_A0A3P9CP60;A0A3P9CNF0;A0A3P9CPB6;A0A3P9CP35	0.624236	0.540697	0.0835388	0.117077	0.13058	0.693104
Complement component 1, r subcomponent_A0A3P9CPC5	0.887942	0.83413	0.0538128	0.0355839	0.00410618	0.801981
Ubiquitin carboxyl-terminal hydrolase_A0A3P9CPD5	0.0486999	0.0653881	-0.0166882	0.360195	0.16983	0.705142
Serine and arginine rich splicing factor 11_A0A3P9CPF0;A0A3P9DGH8	0.00394761	0.000287447	0.00366016	0.927999	0.99448	0.923302
Superoxide dismutase_A0A3P9CPG8	0.271117	0.40457	-0.133452	0.119884	0.0115623	0.373098
26S proteasome non-ATPase regulatory subunit 1_A0A3P9CPH6	-0.0867577	-0.0687953	-0.0179624	0.00979686	0.00669376	0.313271
S-adenosylmethionine synthase_A0A3P9BPH3;A0A3P9CPJ5;A0A3P9DQV1	-0.00138996	0.031898	-0.033288	0.985127	0.672456	0.695147
Prohibitin_A0A3P9CPP4	-0.13348	-0.0897893	-0.0436906	0.0588576	0.213506	0.325929
ATP synthase subunit beta_A0A3P9CPS3	-0.153454	-0.0324504	-0.121003	0.385768	0.434972	0.49345
Retinol dehydrogenase 7_A0A3P9CPT2	-0.0813277	-0.0175469	-0.0637809	0.217224	0.749831	0.253673
Collagen, type XXVIII, alpha 2b_A0A3P9BCW4;A0A3P9CPT3	0.0691509	-0.0643461	0.133497	0.416242	0.467365	0.0389767
Uncharacterized LOC101472999_A0A3P9CPU7;A0A3P9CQM8	0.0996323	0.0859354	0.0136969	0.255371	0.24971	0.873957
Triosephosphate isomerase_A0A3P9CPV2	0.927776	0.125787	0.801989	0.211666	0.547477	0.249692
Annexin_A0A3P9CPW5	-0.0511267	0.00365478	-0.0547815	0.53832	0.962964	0.516733
NADH dehydrogenase [ubiquinone] 1 alpha subcomplex subunit 10, mitochondrial_A0A3P9CPY7	-0.0968246	-0.0910477	-0.00577687	0.0539976	0.0140357	0.889193
Tubulin beta chain_A0A3P9CPZ8;A0A3P9DJ18;A0A3P9BF10;A0A3P9BV72	0.157312	0.234118	-0.0768065	0.222539	0.117213	0.612578
Asparagine synthetase [glutamine-hydrolyzing]_A0A3P9CQ24	-0.110855	-0.103694	-0.00716089	0.20949	0.287575	0.953847
Grancalcin_A0A3P9CQ51;A0A3P9CQ30	-0.0732248	-0.10293	0.0297047	0.457704	0.201988	0.695952
Leucine-rich alpha-2-glycoprotein-like_A0A3P9CQ31	0.551755	0.366559	0.185195	0.0589591	0.0733668	0.281544
Protein disulfide-isomerase A6_A0A3P9CQ38	0.147199	0.148784	-0.00158474	0.100527	0.125004	0.98022
Serpin family C member 1_A0A3P9CQ55	1.10807	0.92753	0.180545	0.0370925	0.00947591	0.518492
Cystathionine gamma-lyase_A0A3P9CQ73	-0.330046	-0.119994	-0.210052	0.0456125	0.350184	0.0591081
Cytochrome b-c1 complex subunit Rieske, mitochondrial_A0A3P9CQ79	-0.0825051	-0.098684	0.0161789	0.383893	0.289656	0.806261
Protein FAM49B_A0A3P9CQ95	0.13461	0.179048	-0.0444384	0.0327913	0.294156	0.761706
Valyl-tRNA synthetase_A0A3P9CRU4;A0A3P9CQ99	-0.00473123	-0.00506866	0.000337438	0.899653	0.896986	0.985624
Filamin-C_A0A3P9BF55;A0A3P9BEY4;A0A3P9CQA1;A0A3P9BEW0	0.258355	0.268628	-0.0102729	0.0289254	0.0434215	0.909511
CCT-alpha_A0A3P9CQA6	0.0321693	-0.0252753	0.0574447	0.78537	0.68927	0.62005
ADP ribosylation factor like GTPase 1_A0A3P9CQA9	-0.0490024	-0.0805478	0.0315454	0.644078	0.376959	0.631682
Eosinophil peroxidase_A0A3P9CQB4;A0A3P9CQB1	1.12202	0.671978	0.450046	0.163115	0.019268	0.41358
H(+)-transporting two-sector ATPase_A0A3P9CQC9;A0A3P9D4B9	-0.0343718	-0.0444191	0.0100473	0.543355	0.42488	0.895856
Lamin B2_A0A3P9CQD7	0.030959	0.0629809	-0.0320219	0.619452	0.257155	0.664928
60S ribosomal protein L36_A0A3P9CQD8	-0.269528	-0.296517	0.0269888	0.032406	0.0250277	0.701707
Alpha-2-HS-glycoprotein_A0A3P9CQH0	1.13473	1.13389	0.000842258	0.000972041	0.000512939	0.993433
Proton-translocating NAD(P)(+) transhydrogenase_A0A3P9CPS9;A0A3P9CQI1	-0.0703493	-0.0860612	0.0157118	0.47819	0.296101	0.835809
Peroxiredoxin-4_A0A3P9CQK5;A0A3P9CS28	0.106136	0.186721	-0.0805857	0.119114	0.0215807	0.00470775
Cytochrome b-c1 complex subunit 9_A0A3P9CQK7	-0.0503739	-0.0562204	0.00584651	0.457438	0.418149	0.760732
Sodium/potassium-transporting ATPase subunit alpha_A0A3P9CS20;A0A3P9CQK9;A0A3P9CRE5	-0.110358	-0.052275	-0.058083	0.115189	0.365644	0.106491
Aldose 1-epimerase_A0A3P9CQQ7	0.438669	0.46179	-0.0231219	0.102017	0.163873	0.931251
Annexin_A0A3P9CQR1	-0.00936742	-0.0680237	0.0586563	0.957938	0.756689	0.821496
Interferon-induced protein with tetratricopeptide repeats 5_A0A3P9CQV5	-0.430274	-0.387081	-0.0431935	0.0010992	0.00361941	0.68849
Developmentally regulated GTP binding protein 1_A0A3P9CQY3	0.0870736	0.0668403	0.0202332	0.38919	0.115486	0.833933
Adenine phosphoribosyltransferase_A0A3P9CR19	0.161343	0.141139	0.0202036	0.34895	0.493786	0.929668
Poly(U) binding splicing factor 60_A0A3P9CRZ1;A0A3P9CSL5;A0A3P9CR32	0.0230179	0.0327459	-0.00972795	0.60214	0.156651	0.807721
Exportin-1_A0A3P9B9V6;A0A3P9CR46	0.131495	0.0741148	0.0573798	0.0521411	0.0379966	0.250582
PDZ and LIM domain protein 5_A0A3P9CR68	0.104881	0.0487439	0.0561372	0.533366	0.789821	0.545688
Actin-related protein 2/3 complex subunit 5_A0A3P9CR81	0.0114789	-0.064135	0.0756139	0.876737	0.417604	0.150591
COP9 signalosome subunit 7A_A0A3P9CR83	0.0109395	-0.00761679	0.0185563	0.802475	0.895076	0.667869
Phospholipase A2_A0A3P9CS67;A0A3P9CR94	0.00095543	-0.0719833	0.0729387	0.989091	0.328722	0.198775
H15 domain-containing protein_A0A3P9CRB1	0.101834	0.109716	-0.0078825	0.321347	0.112209	0.920284
Purine-rich element binding protein Aa_A0A3P9CRC5	0.12154	0.158593	-0.0370527	0.362186	0.184445	0.724944
Ras-related protein ORAB-1_A0A3P9CRD3;A0A3P9CRC8	-0.0970822	-0.0744019	-0.0226803	0.337465	0.228627	0.826759
Cadherin-1_A0A3P9CRD9;A0A3P9CS44	0.0161778	0.0218321	-0.00565432	0.734611	0.752646	0.910469
Pyruvate dehydrogenase E1 component subunit alpha_A0A3P9D0J3;A0A3P9DET6;A0A3P9CZA4;A0A3P9DGF0;A0A3P9CRH7;A0A3P9D0K3;A0A3P9CRE3;A0A3P9D0I8	-0.000467085	0.0766711	-0.0771382	0.994876	0.065213	0.343424
Flotillin_A0A3P9CRH0	0.00484127	0.111016	-0.106175	0.965047	0.462612	0.425201
ATP-binding cassette, sub-family A (ABC1), member 2_A0A3P9CRJ2	0.933363	0.689695	0.243668	0.00984935	0.150883	0.445971
Tubulin beta chain_A0A3P9CRN2;A0A3P9DI89	-0.0631189	0.051611	-0.11473	0.160514	0.0477804	0.02616
[Tau protein] kinase_A0A3P9DKS0;A0A3P9CRN4	-0.0107818	0.110433	-0.121214	0.921431	0.10987	0.297745
Inositol-1-monophosphatase_A0A3P9CRR4	0.0108031	0.0822229	-0.0714198	0.915758	0.501624	0.578226
Component 3 of promoter of RISC_A0A3P9CRT7	0.0448193	0.0865408	-0.0417215	0.598061	0.32442	0.35685
Propanoyl-CoA:carbon dioxide ligase subunit alpha_A0A3P9CRU5	0.0194283	0.0731238	-0.0536955	0.522729	0.0692222	0.0243936
Acetyltransferase component of pyruvate dehydrogenase complex_A0A3P9CRW8	-0.0977275	-0.0481985	-0.049529	0.101707	0.195229	0.4339
CDV3 homolog_A0A3P9CRY1	-0.0435831	-0.152727	0.109144	0.679702	0.091986	0.34161
Lipocalin_A0A3P9CRZ0	0.394998	0.131845	0.263153	0.324275	0.515502	0.502837
RAB14, member RAS oncogene family_A0A3P9CS08;A0A3P9CS16	0.0388439	0.0899051	-0.0510611	0.426595	0.0597884	0.393546
Protein-tyrosine-phosphatase_A0A3P9CS17	-0.0705321	-0.0658444	-0.00468769	0.425001	0.410375	0.953852
Ceruloplasmin-like_A0A3P9CS30	1.07412	0.863597	0.210519	0.03472	0.0141193	0.454267
26S proteasome non-ATPase regulatory subunit 11A_A0A3P9CS52	-0.0963045	-0.100145	0.00384058	0.228248	0.172757	0.960989
Serine/arginine-rich splicing factor 9_A0A3P9CS58	-0.201893	-0.121851	-0.0800415	0.00378201	0.0515957	0.111571
Complement factor B_A0A3P9CSA3	0.826717	0.705489	0.121227	0.0206429	0.0880662	0.670209
Hemopexin_A0A3P9CSH9;A0A3P9CSD2	1.44522	1.42577	0.0194432	0.12072	0.125869	0.972859
Ubiquitin conjugating enzyme E2 N_A0A3P9CSF0;A0A3P9CRY3;A0A3P9CSD3;A0A3P9CSV5	-0.0878241	-0.000804354	-0.0870197	0.335271	0.983793	0.304863
Heme-binding protein 2_A0A3P9CSF2	0.712977	0.721127	-0.0081503	0.0912592	0.145678	0.982639
Syntaxin binding protein 3_A0A3P9CSJ3;A0A3P9CSI8	-0.0529112	0.0149416	-0.0678529	0.489418	0.794579	0.451345
Retinol dehydrogenase 12_A0A3P9CSS6	-0.175077	-0.308636	0.13356	0.187599	0.0288766	0.223699
60S ribosomal protein L18a_A0A3P9CSS7	-0.166259	-0.142326	-0.0239331	0.0147144	0.0307789	0.466455
Hsp90 chaperone protein kinase-targeting subunit_A0A3P9CSV6	0.109044	0.107096	0.00194823	0.372592	0.0954318	0.985047
Cadherin-1_A0A3P9CSX3;A0A3P9CSW8	0.630654	0.432985	0.197669	0.0810748	0.115808	0.503315
CCT-beta_A0A3P9CT18	0.0105342	-0.0302629	0.0407971	0.91101	0.617625	0.69879
ATP synthase subunit e, mitochondrial_A0A3P9CT50	-0.0319741	-0.0630237	0.0310496	0.579225	0.271502	0.662151
Proteoglycan 4_A0A3P9CT54	0.613628	0.654449	-0.0408207	0.0188523	0.00851682	0.798776
Calcium-binding mitochondrial carrier protein SCaMC-1_A0A3P9CT58	0.219037	0.214037	0.00499992	0.0312426	0.00187213	0.940468
Alpha-2-macroglobulin_A0A3P9CT65	1.24823	1.17919	0.0690312	1.37125e-05	0.00106255	0.440789
RAN binding protein 1_A0A3P9CT79	-0.156527	-0.0535065	-0.10302	0.0531793	0.259718	0.194731
Splicing factor, arginine/serine-rich 1_A0A3P9CT80;A0A3P9CU44;A0A3P9CT89	-0.106377	-0.0892489	-0.0171281	0.0650758	0.122518	0.642353
Fructose-bisphosphate aldolase_A0A3P9CTB7	-0.134239	-0.0728548	-0.0613839	0.0344868	0.010249	0.237587
Interleukin-1 receptor-like 2_A0A3P9CTC0;A0A3P9CUU7;A0A3P9DK17	0.716632	0.665588	0.0510444	0.0138404	0.00671838	0.735871
CCT-theta_A0A3P9CTC9;A0A3P9CUX1	-0.0887544	-0.100825	0.0120701	0.362215	0.108638	0.893346
Collagen, type I, alpha 1a_A0A3P9CTF5	0.349834	0.182235	0.167599	0.122529	0.374	0.284536
Phosducin like 3_A0A3P9CTK0	-0.0837142	0.0726337	-0.156348	0.040814	0.0753501	0.0135744
Kininogen-1_A0A3P9CTL5	0.832092	0.860035	-0.0279427	0.0160372	0.00258887	0.862631
Autophagy related 3_A0A3P9CTM7	-0.0308177	0.0229552	-0.0537729	0.668746	0.766715	0.169504
Argininosuccinate synthase_A0A3P9CTU7	-0.130681	-0.13857	0.00788901	0.0316095	0.040667	0.904763
Cytochrome P450 2J2_A0A3P9CTV2;A0A3P9CTX6	0.314483	0.629623	-0.31514	0.269489	0.0302848	0.164843
RIC8 guanine nucleotide exchange factor B_A0A3P9CTY7	-0.0662504	0.0582566	-0.124507	0.613883	0.599965	0.354083
Ribosomal protein L23a_A0A3P9CTZ0	0.000631041	-0.0897966	0.0904276	0.995125	0.484071	0.575794
Surfeit locus protein 4_A0A3P9CTZ7	0.105508	-0.0721474	0.177656	0.236105	0.520323	0.136506
Glucosidase 2 subunit beta_A0A3P9CTZ8	0.246377	0.24275	0.00362771	0.0129219	0.000264948	0.949235
Eukaryotic translation initiation factor 3 subunit G_A0A3P9CU16	-0.0275183	0.0406352	-0.0681535	0.763929	0.419577	0.421655
Annexin_A0A3P9CU38	0.121857	0.203951	-0.082094	0.401425	0.275298	0.579328
Proteasome subunit beta_A0A3P9CU85	-0.0723948	-0.0283695	-0.0440253	0.208117	0.501907	0.200019
RNA-splicing ligase RtcB homolog_A0A3P9CU97;A0A3P9CU93	-0.0664259	-0.0724191	0.00599325	0.665113	0.191639	0.968813
Small monomeric GTPase_A0A3P9DM20;A0A3P9BBH2;A0A3P9CUC9;A0A3P9BBH3	0.0309477	0.0448019	-0.0138542	0.60554	0.280865	0.816486
Coatomer subunit delta_A0A3P9CUH2;A0A3P9CZE8;A0A3P9CZJ3	-0.0553674	-0.0372236	-0.0181438	0.329355	0.459403	0.474076
59 kDa serine/threonine-protein kinase_A0A3P9BPR5;A0A3P9CUJ9	0.00510202	0.0871569	-0.0820549	0.960128	0.0991047	0.441936
Selenide, water dikinase_A0A3P9CUK9	-0.0931347	-0.0097016	-0.0834331	0.360823	0.892952	0.469864
Beta-2-microglobulin_A0A3P9CUP0	1.4208	1.19413	0.226676	0.00538824	3.17011e-05	0.217899
General vesicular transport factor p115_A0A3P9CVR7;A0A3P9CUS5;A0A3P9CUP9;A0A3P9CUP4	0.109164	0.105217	0.00394686	0.0369896	0.126941	0.938799
Peroxiredoxin-6_A0A3P9CUS3	-0.0350594	0.109459	-0.144519	0.84689	0.495904	0.228559
Prolactin_A0A3P9CUS4	-0.0466795	-0.0663822	0.0197027	0.516231	0.516766	0.871662
Guanine nucleotide-binding protein G(i) subunit alpha-1_A0A3P9CUZ4	-0.0896677	0.0351341	-0.124802	0.21727	0.538341	0.0502055
Proteasome activator subunit 2_A0A3P9CV08	-0.0276003	0.0997227	-0.127323	0.801859	0.497277	0.266498
Serine/threonine kinase 26_A0A3P9CV32	-0.0476279	0.0429165	-0.0905443	0.549763	0.396656	0.340943
Acidic leucine-rich nuclear phosphoprotein 32 family member B_A0A3P9CV58	-0.0874729	-0.0440547	-0.0434182	0.21548	0.45527	0.358552
Enoyl-CoA hydratase domain containing 2_A0A3P9CV71	-0.328523	-0.147739	-0.180784	0.027644	0.0337388	0.135536
Aconitate hydratase, mitochondrial_A0A3P9CV72	-0.0639299	0.0274207	-0.0913506	0.0873361	0.357595	0.0145141
Myocilin_A0A3P9CV73	0.312363	0.400796	-0.0884337	0.0919659	0.031352	0.513243
Vacuolar protein-sorting-associated protein 36_A0A3P9CVH2;A0A3P9CV76	-0.122516	-0.234839	0.112323	0.295969	0.0644489	0.455176
Alpha-2-macroglobulin-like_A0A3P9CXM5;A0A3P9CYP0;A0A3P9CV99;A0A3P9CVA7;A0A3P9CX46;A0A3P9CWM1	0.151599	0.11196	0.0396392	0.593004	0.589942	0.893833
Proteasome 26S subunit, non-ATPase 7_A0A3P9CVR5;A0A3P9CVA1	-0.11403	-0.0444997	-0.06953	0.0333783	0.314453	0.103884
Poly(U)-binding-splicing factor PUF60_A0A3P9CVE2;A0A3P9CRZ1;A0A3P9CSL5;A0A3P9CR32	-0.0448055	-0.0685559	0.0237504	0.4481	0.103087	0.713177
78 kDa glucose-regulated protein_A0A3P9CVG6;A0A3P9DM96;A0A3P9DLS9;A0A3P9DM40;A0A3P9DM03;A0A3P9DLB3;A0A3P9CVP3;A0A3P9DLH9;A0A3P9DLC0;A0A3P9DMR6;A0A3P9DM61;A0A3P9DMB9	0.113599	0.0583061	0.0552926	0.375268	0.479752	0.633026
Plasminogen_A0A3P9CUC6;A0A3P9CVH7;A0A3P9CW29	0.965974	0.805168	0.160805	0.00664037	0.000188182	0.268744
Cullin associated and neddylation dissociated 1_A0A3P9CVT3	-0.0134475	0.0191934	-0.0326409	0.682448	0.600922	0.352274
Acidic (leucine-rich) nuclear phosphoprotein 32 family, member B_A0A3P9CVW6	-0.172265	-0.130798	-0.0414667	0.0314224	0.0324299	0.448486
2,4-dienoyl-CoA reductase 1_A0A3P9CX31;A0A3P9CVY6	0.0724436	0.183701	-0.111257	0.140146	0.000822805	0.0308243
Programmed cell death protein 4_A0A3P9CW13	-0.144792	-0.0590413	-0.0857503	0.521028	0.707528	0.68953
Phospholipid phosphatase 3_A0A3P9CXK7;A0A3P9CXL7;A0A3P9CW42;A0A3P9CWT9	0.117206	0.262132	-0.144926	0.280173	0.0569395	0.2844
3'-phosphoadenosine-5'-phosphosulfate synthase_A0A3P9CWX3;A0A3P9CW63	0.0785502	0.0710161	0.0075341	0.555887	0.527778	0.953318
Aspartate carbamoyltransferase_A0A3P9CW69	0.124913	0.0457804	0.0791323	0.0436917	0.195041	0.0942928
Aminoacyl tRNA synthetase complex interacting multifunctional protein 1_A0A3P9BS70;A0A3P9CW72	-0.00822864	0.00970018	-0.0179288	0.896059	0.617293	0.783941
Caspase-6_A0A3P9CW83;A0A3P9D8N0	-0.494834	-0.405515	-0.0893196	0.0135291	0.048537	0.589113
Phosphoinositide phospholipase C_A0A3P9CX64;A0A3P9CWE6	-0.334997	-0.228728	-0.106269	0.0200981	0.037642	0.315323
Adenylate kinase isoenzyme 1_A0A3P9CWL7	0.196486	0.39386	-0.197374	0.346268	0.0475694	0.116455
S-methyl-5'-thioadenosine phosphorylase_A0A3P9CWM5	-0.103949	-0.0694663	-0.0344828	0.240942	0.294437	0.639336
DnaJ homolog subfamily A member 2_A0A3P9CWQ3	0.0335491	0.0996206	-0.0660714	0.56203	0.011647	0.237337
Adducin 1_A0A3P9CWQ9;A0A3P9CWR4;A0A3P9CVP1;A0A3P9CVP6	0.435456	0.615835	-0.180379	0.00326702	0.00036362	0.0434325
Calumenin-B_A0A3P9CWS2	0.180507	0.143622	0.0368845	0.200654	0.2229	0.64671
Diadenosine tetraphosphate synthetase_A0A3P9CWU8;A0A3P9CXE6	-0.148764	-0.190034	0.0412696	0.146339	0.0278732	0.696534
Complex I-B17_A0A3P9CWX5	-0.165096	-0.153928	-0.0111688	0.00643245	0.0263077	0.84044
Tropomyosin alpha-3 chain_A0A3P9CWZ8;A0A3P9CW02;A0A3P9CX01	-0.00276591	-0.105115	0.102349	0.981684	0.419098	0.221036
P-type domain-containing protein_A0A3P9BW15;A0A3P9CX53	1.09245	1.02019	0.0722568	0.00504261	0.00391818	0.664708
Long-chain-fatty-acid--CoA ligase 3_A0A3P9CX68;A0A3P9B7J7	-0.0354051	-0.0593408	0.0239357	0.532843	0.0164501	0.677679
Non-specific serine/threonine protein kinase_A0A3P9CX95;A0A3P9CY22	-0.0868905	-0.0166589	-0.0702317	0.393749	0.886715	0.498759
Shroom family member 4_A0A3P9CXA0	-0.0696	-0.148479	0.0788792	0.767232	0.460948	0.730381
ADP-ribosylation factor 5_A0A3P9CXC5;A0A3P9CVU7	0.157767	0.0825179	0.0752489	0.117542	0.22834	0.349881
Inositol-1-monophosphatase_A0A3P9CXC6	0.18336	0.261935	-0.0785752	0.0956033	0.0104075	0.43201
Diadenosine tetraphosphate synthetase_A0A3P9CXE6	-0.399809	-0.388991	-0.0108184	0.0454722	0.0631633	0.910584
40S ribosomal protein S4_A0A3P9CXG2	-0.140916	-0.124934	-0.0159821	0.0083159	0.00918794	0.60604
N-acylneuraminate cytidylyltransferase_A0A3P9CXL2	0.38101	0.348815	0.0321952	0.0221768	0.0114855	0.770397
Protein-glutamine gamma-glutamyltransferase K_A0A3P9CXP8	-0.407769	-0.173873	-0.233895	0.0109858	0.165218	0.0384616
NAD(P)(+)--arginine ADP-ribosyltransferase_A0A3P9CXS4;A0A3P9CW38	0.868985	1.17309	-0.304106	0.0128272	0.00068211	0.0792832
Glutathione transferase_A0A3P9CY35	0.604446	0.408645	0.195802	0.0824935	0.205286	0.533334
Protein RER1_A0A3P9CY60;A0A3P9CYT6	-0.00289675	-0.0127785	0.00988179	0.969487	0.684954	0.891703
AIR carboxylase_A0A3P9DT65;A0A3P9DRT3;A0A3P9CYN5;A0A3P9CY67;A0A3P9DT93	-0.127909	-0.155342	0.0274324	0.0573771	0.112985	0.700942
Peptidylprolyl isomerase_A0A3P9CY72	0.0070209	0.0863005	-0.0792796	0.901234	0.0446544	0.234021
Succinate--CoA ligase [ADP-forming] subunit beta, mitochondrial_A0A3P9CY88	0.203526	0.279849	-0.0763234	0.00445541	0.000328584	0.103423
Lectin, mannose binding 1_A0A3P9CYB1	0.051488	0.030144	0.021344	0.673069	0.783804	0.722391
Y-box binding protein 1_A0A3P9CYK4	-0.049763	-0.045061	-0.004702	0.710265	0.639843	0.971716
Protein NDRG2_A0A3P9CYK5	0.195209	0.325597	-0.130388	0.483908	0.228988	0.593238
EMILIN-2_A0A3P9CYP2	0.818844	0.849666	-0.0308227	0.000606344	0.00597114	0.810909
Protein C, inactivator of coagulation factors Va and VIIIa_A0A3P9CYS0	0.935974	0.864975	0.070999	0.0043981	0.000291263	0.537198
Annexin_A0A3P9CYS5	0.475877	0.72003	-0.244153	0.0309113	0.0283552	0.194997
Macrophage mannose receptor 1_A0A3P9CYS8	0.264237	0.235243	0.0289934	0.0459183	0.082145	0.788443
Glucose-6-phosphate isomerase_A0A3P9D084;A0A3P9CYS9	-0.075938	-0.0789564	0.00301836	0.181759	0.119841	0.933296
Ubiquitin protein ligase E3 component n-recognin 4_A0A3P9CYU1	-0.0572847	0.00999581	-0.0672806	0.360854	0.788972	0.263596
Peptidylprolyl isomerase_A0A3P9CYV2	-0.360282	-0.216408	-0.143875	0.00737402	0.00796902	0.0932429
G3BP stress granule assembly factor 1_A0A3P9CYY1;A0A3P9CZA8	0.101887	0.00957116	0.0923157	0.513477	0.927504	0.586245
Serine hydroxymethyltransferase_A0A3P9CZ15;A0A3P9BGD6;A0A3P9BJB3;A0A3P9BJY8;A0A3P9D0K1;A0A3P9BET6	-0.23731	-0.238177	0.00086624	0.0338788	0.0299718	0.988178
Endophilin-B1_A0A3P9CZ25	0.129188	0.128573	0.000615094	0.0240126	0.0090891	0.988645
Frizzled-related protein 1_A0A3P9CZ61	0.803591	0.985902	-0.182311	0.0069296	0.0089407	0.303187
Ribosomal protein S6 kinase_A0A3P9CZ84	0.00985247	0.0630307	-0.0531782	0.825916	0.111713	0.16067
Peptidyl-prolyl cis-trans isomerase_A0A3P9CZ96	0.201442	0.142773	0.0586695	0.136	0.0861905	0.578999
Coatomer subunit delta_A0A3P9CZE8;A0A3P9CZJ3	0.103507	0.119527	-0.0160198	0.0253192	0.0192179	0.429102
Acyl-CoA thioesterase 9_A0A3P9CZH0;A0A3P9CZG5	0.110481	0.128497	-0.0180159	0.0476302	0.0278685	0.10065
Maleylacetoacetate isomerase_A0A3P9CZP2;A0A3P9CZI7;A0A3P9D0T1	-0.160868	-0.162346	0.00147755	0.618727	0.587357	0.99402
Lymphocyte cytosolic protein 1_A0A3P9CZK4	0.126802	0.14694	-0.0201386	0.288131	0.208992	0.509986
Protein-synthesizing GTPase_A0A3P9CZN3	-0.119767	-0.0974634	-0.0223038	0.0991362	0.0854316	0.596323
Fructose-bisphosphatase_A0A3P9D0Z0;A0A3P9CZQ2	-0.0995825	-0.0953779	-0.00420463	0.562786	0.55135	0.973855
S-formylglutathione hydrolase_A0A3P9D8R9;A0A3P9CZR4	0.135901	0.213115	-0.0772137	0.364135	0.163887	0.622782
Splicing factor 3b subunit 2_A0A3P9CZS3	-0.00653248	0.00169094	-0.00822343	0.929135	0.985099	0.942765
FUN14 domain containing 1_A0A3P9CZS8	0.124746	0.121964	0.00278262	0.0894783	0.0941831	0.968021
Calcium-activated neutral proteinase 1_A0A3P9D109;A0A3P9CZW4	-0.124441	-0.129138	0.00469702	0.314562	0.25612	0.966309
Eukaryotic translation initiation factor 2 subunit beta_A0A3P9D020	-0.102831	-0.16522	0.0623895	0.0148738	0.00328276	0.177439
Signal sequence receptor subunit alpha_A0A3P9D039	-0.0882722	-0.113787	0.0255148	0.0459297	0.0405651	0.421515
von Willebrand factor A domain containing 8_A0A3P9D041;A0A3P9D1I6	0.276508	0.162122	0.114387	0.0498669	0.342713	0.477677
Kinectin 1_A0A3P9D0D1;A0A3P9CZU8;A0A3P9CZ35	0.0175241	-0.0145695	0.0320936	0.578001	0.645508	0.273421
Eukaryotic translation initiation factor 4C_A0A3P9D0D5	0.193677	-0.016413	0.21009	0.13913	0.875793	0.0310422
GNAS complex locus_A0A3P9D0H8;A0A3P9DDP9;A0A3P9DEN5;A0A3P9BBU0	0.175824	0.16451	0.0113143	0.0541279	0.00973638	0.857908
Charged multivesicular body protein 4b_A0A3P9D0I3	0.0456864	0.167804	-0.122118	0.785511	0.0092011	0.440316
Serine and arginine rich splicing factor 6a_A0A3P9D0J8	-0.0215018	-0.0396853	0.0181836	0.74832	0.47094	0.817627
15-oxoprostaglandin 13-reductase_A0A3P9D0U1;A0A3P9D1U4;A0A3P9D0L3	-0.455499	-0.266977	-0.188522	0.00696255	0.0267314	0.0175078
15-oxoprostaglandin 13-reductase_A0A3P9D0N5;A0A3P9D1E5;A0A3P9D0U1;A0A3P9D0L3;A0A3P9D1C8	-0.091253	0.0402522	-0.131505	0.184516	0.558164	0.085853
Thioredoxin_A0A3P9D0P2	0.148855	0.0837819	0.0650731	0.0574386	0.384056	0.493954
Mitogen-activated protein kinase_A0A3P9D0Q1;A0A3P9D0P5	0.154449	0.123063	0.031386	0.0449906	0.0366443	0.483064
RNA helicase_A0A3P9BP84;A0A3P9BPA3;A0A3P9D011;A0A3P9D0R3;A0A3P9BP95;A0A3P9D0G5	0.0465779	-0.0278193	0.0743972	0.817573	0.824646	0.729902
2-phospho-D-glycerate hydro-lyase_A0A3P9D0S4;A0A3P9D214;A0A3P9D0X8	0.0489163	0.152136	-0.10322	0.662754	0.121842	0.280049
Thioredoxin_A0A3P9D0S5;A0A3P9D0T0	-0.553416	-0.263791	-0.289625	0.100936	0.324993	0.0950477
ELAV-like protein_A0A3P9D0T3;A0A3P9D087;A0A3P9D195	-0.0164251	-0.0309127	0.0144876	0.855471	0.674927	0.862231
Profilin_A0A3P9D0W7	-0.312242	-0.162263	-0.149978	0.0576952	0.190672	0.113842
Amine oxidase_A0A3P9DU56;A0A3P9D179;A0A3P9D0Y5;A0A3P9CZP3;A0A3P9DTX6;A0A3P9DUF2	0.128985	0.197183	-0.0681985	0.426276	0.0410144	0.634953
ATP-citrate synthase_A0A3P9D156;A0A3P9D1U6;A0A3P9D161;A0A3P9D2I6	-0.061839	0.0953024	-0.157141	0.414975	0.31473	0.0539732
Peptidylprolyl isomerase_A0A3P9D173	0.109595	0.00369042	0.105905	0.61444	0.987172	0.110383
Complement C8 gamma chain_A0A3P9D1A8;A0A3P9D196	0.784712	0.626872	0.15784	0.000217359	0.0239756	0.257896
Fumarylacetoacetase_A0A3P9D072;A0A3P9D1A0	-0.100926	-0.322454	0.221528	0.792311	0.448888	0.413214
Tetraspanin_A0A3P9D1A2;A0A3P9D227;A0A3P9D2E3	0.165127	0.105264	0.0598631	0.104098	0.178122	0.488191
Vesicle amine transport 1_A0A3P9D1B6	0.1756	0.43712	-0.261521	0.261793	0.0119321	0.087757
Phosphatidylinositol-5-phosphate 4-kinase type 2 alpha_A0A3P9D1D7;A0A3P9D221	0.198726	0.124138	0.0745881	0.0659083	0.0694089	0.401925
Isocitrate dehydrogenase [NADP]_A0A3P9D1F0	-0.0304791	-0.00835192	-0.0221272	0.718706	0.915791	0.505937
Small nuclear ribonucleoprotein polypeptide A'_A0A3P9D1H5	-0.0849097	-0.102682	0.0177726	0.278829	0.11825	0.827988
Glutamic--pyruvic transaminase_A0A3P9D1J6;A0A3P9D1K5	-0.0123836	0.205363	-0.217747	0.954472	0.335597	0.0254561
GMP reductase_A0A3P9D1K3	-0.314725	-0.278803	-0.0359225	0.0237604	0.0358628	0.462015
Tetraspanin_A0A3P9D1N3	-0.206742	-0.295843	0.0891005	0.145226	0.0223405	0.43743
Activated RNA polymerase II transcriptional coactivator p15_A0A3P9D1N4	0.109306	0.131449	-0.022143	0.368857	0.158983	0.844967
Homogentisate 1,2-dioxygenase_A0A3P9D1P6	-0.25767	-0.3424	0.0847303	0.550705	0.438228	0.751158
10 kDa heat shock protein, mitochondrial_A0A3P9D352;A0A3P9D1Q1	-0.242021	-0.163825	-0.0781964	0.0177877	0.0609061	0.214152
MOB-like protein phocein_A0A3P9D1U0;A0A3P9D1Q8	-0.044239	0.0108386	-0.0550776	0.507109	0.893524	0.371501
60 kDa chaperonin_A0A3P9D1R6	-0.179368	-0.127205	-0.0521639	0.108927	0.201384	0.293255
Arp2/3 complex 34 kDa subunit_A0A3P9D1S5	-0.0382625	-0.0460747	0.00781219	0.347029	0.24157	0.797937
15-oxoprostaglandin 13-reductase_A0A3P9D1T1	0.0624731	0.0201792	0.0422939	0.7582	0.888715	0.862261
FACT complex subunit_A0A3P9D1U2;A0A3P9D151	0.0940564	0.114404	-0.0203476	0.511424	0.50336	0.918283
Dehydrogenase/reductase SDR family member 4_A0A3P9D1V8	0.0994406	0.150326	-0.0508853	0.165501	0.0708978	0.332771
Ubiquitin conjugating enzyme E2 L3_A0A3P9D1W0	0.0601746	0.0610961	-0.000921488	0.158723	0.178803	0.977364
Dihydrolipoamide acetyltransferase component of pyruvate dehydrogenase complex_A0A3P9D1W3	-0.037449	0.00549323	-0.0429423	0.614196	0.905255	0.530804
Solute carrier family 25 member 11_A0A3P9D1W9	0.169634	0.133183	0.0364503	0.0958711	0.132122	0.699298
Linkage group 3 C20orf27 homolog_A0A3P9D1X1	0.0879322	0.226617	-0.138685	0.57108	0.150972	0.469208
Lipocalin_A0A3P9D1Z4	0.985143	0.821277	0.163866	0.0164876	0.00132157	0.397347
Leucine rich repeat containing 47_A0A3P9D223	-0.000390172	0.0734511	-0.0738412	0.997345	0.205419	0.551163
Coagulation factor XIII A chain_A0A3P9D297;A0A3P9D1V1;A0A3P9D142	-1.12684	-1.59323	0.466383	0.223263	0.162531	0.206955
Mitochondrial fission 1 protein_A0A3P9D2B2	0.32549	0.198253	0.127237	0.00304473	0.0724878	0.131067
39S ribosomal protein L12, mitochondrial-like_A0A3P9D2D9	0.0125735	-0.110623	0.123196	0.912851	0.397328	0.0437986
60S ribosomal protein L8_A0A3P9D2G0	-0.139313	-0.0906918	-0.0486213	0.0441923	0.0577059	0.25783
Protein disulfide-isomerase A4_A0A3P9D2L0	0.179147	0.141885	0.0372626	0.127408	0.22028	0.529174
Prefoldin subunit 3_A0A3P9D2L8	-0.154919	-0.053843	-0.101076	0.228041	0.323496	0.413812
Dolichyl-diphosphooligosaccharide--protein glycosyltransferase 48 kDa subunit_A0A3P9D2M0	0.0715728	0.017531	0.0540418	0.489474	0.864891	0.278466
CCT-epsilon_A0A3P9D1Z8;A0A3P9D2Q3	-0.02486	-0.0289729	0.00411294	0.763841	0.414097	0.957934
Collagen alpha-3(VI) chain_A0A3P9D2R0;A0A3P9D3D6;A0A3P9C7T8;A0A3P9C792;A0A3P9C783;A0A3P9DUV7;A0A3P9DUB7;A0A3P9DV38;A0A3P9DTN3;A0A3P9DUV4;A0A3P9DUW6	0.810358	0.626831	0.183528	0.00781702	0.14085	0.512981
Integrin beta_A0A3P9D2R3	0.409279	0.345147	0.0641325	0.00175321	0.00510523	0.331266
Synemin_A0A3P9D2V7	0.327064	0.345907	-0.0188435	0.211788	0.232501	0.929315
Phosphoglucomutase 2_A0A3P9D2X6	0.111096	0.112263	-0.00116715	0.117939	0.169434	0.986049
Splicing factor 3b subunit 1_A0A3P9D322	-0.139941	-0.141558	0.00161656	0.139696	0.169666	0.979855
Sex hormone binding globulin_A0A3P9D333	0.757891	0.616877	0.141015	0.355211	0.356624	0.84161
ATP synthase subunit d, mitochondrial_A0A3P9D3C4;A0A3P9D383	-0.0714186	-0.0395701	-0.0318484	0.244169	0.281772	0.609164
Phosphatidylethanolamine binding protein 1_A0A3P9D3B0	0.0720727	0.194347	-0.122274	0.795819	0.362711	0.56961
Sorting nexin 2_A0A3P9BX86;A0A3P9D3C1;A0A3P9BXP1	-0.139614	-0.102557	-0.0370575	0.0205482	0.0493493	0.22997
ES1 protein homolog, mitochondrial_A0A3P9D4L4;A0A3P9D3D5	-0.142282	0.0352027	-0.177485	0.27299	0.653109	0.198554
Acyl-CoA dehydrogenase very long chain_A0A3P9D3I5	0.0424331	-0.00710269	0.0495358	0.422477	0.926619	0.484304
Eukaryotic translation initiation factor 5A_A0A3P9D3J2;A0A3P9D3J9	0.220341	0.42334	-0.202999	0.393579	0.132599	0.420602
Carboxypeptidase Z_A0A3P9D3R3	0.00270377	-0.141824	0.144528	0.99027	0.588929	0.39676
Abhydrolase domain containing 10_A0A3P9D5C0;A0A3P9D3S9	0.191015	0.2742	-0.083185	0.138627	0.00320852	0.410233
Aminoacyl-tRNA hydrolase_A0A3P9D3T6	-0.17373	-0.0785953	-0.0951345	0.118597	0.314439	0.407882
Ribosomal protein L7_A0A3P9D3W9	-0.015759	0.0118397	-0.0275987	0.911804	0.902142	0.840361
Inter-alpha-trypsin inhibitor heavy chain 2_A0A3P9D445	1.24076	1.09349	0.147266	0.00175722	0.0589101	0.582145
N(alpha)-acetyltransferase 50, NatE catalytic subunit_A0A3P9D5P0;A0A3P9D454	0.177632	0.146804	0.0308283	0.204047	0.0181776	0.795055
Cystatin-B_A0A3P9D470	-0.134288	-0.0667577	-0.0675303	0.125332	0.347331	0.0978168
Ubiquitin carboxyl-terminal hydrolase_A0A3P9D4D1	0.144767	0.183194	-0.0384266	0.119195	0.0778335	0.530795
ATP synthase subunit gamma_A0A3P9D4I0;A0A3P9D3B5	-0.00408676	0.0320613	-0.0361481	0.947386	0.643551	0.673488
von Willebrand factor A domain-containing protein 1_A0A3P9D4M1	0.178842	0.199755	-0.0209132	0.278127	0.253149	0.815861
COP9 signalosome subunit 5_A0A3P9D4M2	-0.0568995	-0.0188585	-0.038041	0.365428	0.621487	0.497163
Transgelin_A0A3P9D4M4;A0A3P9BCD5	0.177178	0.315768	-0.138589	0.130339	0.00857003	0.113348
ABI family, member 3 (NESH) binding protein a_A0A3P9D519;A0A3P9D4M9	0.304972	0.691298	-0.386326	0.112043	0.00186442	0.0318928
Hemoglobin subunit alpha-A-like_A0A3P9D4N0	1.93818	1.95184	-0.0136616	0.293304	0.283653	0.989638
Sciellin_A0A3P9D4P8	-0.402106	-0.199199	-0.202907	0.000538664	0.0263454	0.0605097
Hemoglobin subunit beta-A_A0A3P9D580;A0A3P9D4Q2;A0A3P9D5J7	1.43071	1.31941	0.111304	0.293083	0.293446	0.904366
Phospholipid scramblase_A0A3P9D4Q3;A0A3P9D3P0	-0.220017	-0.298783	0.078766	0.0194354	0.0269331	0.385916
Macrophage-capping protein_A0A3P9D4Q9	-0.250649	-0.208288	-0.0423604	0.0505149	0.0444167	0.667427
60S ribosomal protein L21_A0A3P9D4V4	-0.195325	-0.184733	-0.0105919	0.0049197	0.00173187	0.799553
GlcNAc 2-epimerase_A0A3P9D4W2	0.224113	0.221046	0.00306716	0.0630242	0.0347918	0.970789
Importin subunit alpha_A0A3P9D5M9;A0A3P9D4Y6	-0.107856	-0.0946836	-0.0131728	0.0572589	0.0420241	0.653252
Ribosomal protein L24_A0A3P9D523	-0.137718	-0.15403	0.0163124	0.045263	0.0270757	0.771991
Trafficking from ER to golgi regulator_A0A3P9D524	0.11162	0.0763406	0.0352798	0.0427059	0.3053	0.590055
Protein transport protein Sec61 subunit gamma_A0A3P9D525	0.165776	-0.0831744	0.248951	0.284419	0.400604	0.108808
NACHT domain-containing protein_A0A3P9DA56;A0A3P9DB02;A0A3P9D4Q1;A0A3P9AS81;A0A3P9C8L9;A0A3P9BNS5;A0A3P9C428;A0A3P9C6Y3;A0A3P9DIW4;A0A3P9DTS8;A0A3P9D1Y4;A0A3P9DV43;A0A3P9BHM8;A0A3P9CDW8;A0A3P9DI62;A0A3P9ARU2;A0A3P9D534;A0A3P9CTN8;A0A3P9DDK0;A0A3P9CZK7;A0A3P9DUC2;A0A3P9DT62;A0A3P9DJT1;A0A3P9DT03;A0A3P9C4F8;A0A3P9D5E3;A0A3P9C3Q9;A0A3P9D420;A0A3P9DJY7;A0A3P9AS70;A0A3P9DJ94;A0A3P9DGT8;A0A3P9B079;A0A3…	-0.138427	-0.0544427	-0.0839846	0.118499	0.40608	0.210139
Cystatin-B-like_A0A3P9D548	-0.360134	-0.203403	-0.156731	0.0347503	0.0492667	0.236543
Hemoglobin subunit alpha-B_A0A3P9D4T4;A0A3P9D627;A0A3P9D577;A0A3P9D5Y3;A0A3P9CTB9;A0A3P9D4S9;A0A3P9D591	1.09768	0.969347	0.128335	0.327828	0.363601	0.885339
Hemoglobin subunit beta-A_A0A3P9D580	1.50244	1.40074	0.101699	0.291549	0.304034	0.915495
Membrane cofactor protein_A0A3P9D594;A0A3P9D5J1	-0.0427465	0.0950742	-0.137821	0.739759	0.472567	0.0922596
Syntenin-1_A0A3P9D595;A0A3P9D5T8	0.257826	0.31397	-0.0561435	0.0471305	0.0775986	0.564925
NSFL1 cofactor p47_A0A3P9D5U8;A0A3P9D5A5	0.0558374	-0.00297255	0.05881	0.127726	0.951125	0.327828
Sushi repeat containing protein X-linked_A0A3P9D6R9;A0A3P9D5B1	0.199131	0.0490639	0.150067	0.203838	0.744118	0.155274
Uncharacterized protein_A0A3P9D5B9	1.15977	1.00384	0.155932	0.037937	0.126817	0.705795
Tubulin alpha chain_A0A3P9DDJ3;A0A3P9DAG0;A0A3P9BTJ6;A0A3P9BTM1;A0A3P9ATP3;A0A3P9CEL8;A0A3P9DE37;A0A3P9DEX0;A0A3P9D5F8;A0A3P9BUD2;A0A3P9ATZ7;A0A3P9ATS3;A0A3P9D6W3;A0A3P9ATN5	0.0543485	0.142203	-0.0878544	0.163234	0.0173502	0.0261857
Uncharacterized protein_A0A3P9D5L8	-0.299942	-0.207694	-0.0922476	0.39129	0.595452	0.869763
Isocitrate dehydrogenase [NADP]_A0A3P9D5N7	0.0425014	-0.0291139	0.0716152	0.810346	0.841669	0.674713
Uncharacterized protein_A0A3P9D5P2	0.239318	0.333848	-0.0945294	0.227587	0.154453	0.444583
Plasticin_A0A3P9D7D2;A0A3P9D5P9	-0.342114	0.105766	-0.44788	0.0967645	0.400808	0.0634868
SHC-transforming protein 1_A0A3P9D6Q3;A0A3P9BN00;A0A3P9D5R6;A0A3P9BN12	0.0772221	0.010349	0.066873	0.379154	0.916914	0.3715
UFM1-activating enzyme_A0A3P9D5X7	-0.125469	-0.161355	0.0358854	0.218456	0.0327547	0.669923
Mitochondrial pyruvate carrier_A0A3P9D604	-0.19961	-0.312536	0.112926	0.145995	0.0230329	0.442915
Protein S100-A16_A0A3P9D621	0.183574	0.095635	0.0879394	0.385184	0.224207	0.642402
Small nuclear ribonucleoprotein G_A0A3P9D640	-0.0262917	0.0244226	-0.0507143	0.791069	0.773857	0.677516
Hemoglobin subunit alpha-A-like_A0A3P9D695;A0A3P9D4R7;A0A3P9D4N0;A0A3P9D628	1.27773	1.2382	0.0395222	0.277255	0.280682	0.96296
Ig-like domain-containing protein_A0A3P9DD86;A0A3P9DCN0;A0A3P9D7P0;A0A3P9D7U2;A0A3P9D8V4;A0A3P9DDC4;A0A3P9DBP4;A0A3P9DD60;A0A3P9D6J9;A0A3P9DD69;A0A3P9DG25;A0A3P9D642;A0A3P9D7Q0;A0A3P9DDA6;A0A3P9DBN8;A0A3P9DC58;A0A3P9D625;A0A3P9DHM1;A0A3P9DHM6;A0A3P9DGG7;A0A3P9DG54;A0A3P9DA01;A0A3P9DH03;A0A3P9DD94;A0A3P9D7R6;A0A3P9D696;A0A3P9D7L8;A0A3P9D767;A0A3P9DBL1;A0A3P9D711;A0A3P9D7M3;A0A3P9D6A6;A0A3P9DHU6;A0…	-1.45901	-1.22127	-0.23774	0.0325425	0.0418493	0.126992
Malic enzyme_A0A3P9D6H1	-0.00270962	0.0570983	-0.0598079	0.976772	0.427384	0.378643
40S ribosomal protein S20_A0A3P9B5E7;A0A3P9D6J2	-0.0372607	-0.0305749	-0.0066858	0.517055	0.474957	0.877044
NACHT domain-containing protein_A0A3P9D6Q1	-0.239813	-0.276001	0.0361885	0.119152	0.0645231	0.828438
Extracellular matrix protein 1_A0A3P9D7C8;A0A3P9D6W0;A0A3P9D7K9	0.170221	0.20152	-0.0312991	0.502481	0.438042	0.914176
Annexin_A0A3P9D6X3	-0.0743467	0.0991622	-0.173509	0.325672	0.153895	0.00518231
5'-3' exoribonuclease_A0A3P9D740	0.0397334	0.0464253	-0.0066919	0.502525	0.281405	0.89907
Collagen alpha-1(XII) chain_A0A3P9D784	-0.301328	-0.408855	0.107527	0.160241	0.0998906	0.277177
Collagen alpha-1(XII) chain_A0A3P9D784;A0A3P9D789	-0.202035	-0.355183	0.153148	0.242316	0.103336	0.154086
Eukaryotic translation initiation factor 4H_A0A3P9D8L0;A0A3P9D7B2	0.0441643	-0.000500345	0.0446646	0.311874	0.986261	0.376897
40S ribosomal protein S11_A0A3P9D7E8	-0.078817	-0.0736488	-0.00516817	0.0595875	0.0366523	0.841553
Electron transfer flavoprotein subunit alpha_A0A3P9D7G0	-0.0319603	0.0641259	-0.0960862	0.617998	0.315461	0.115222
Insulin like growth factor binding protein acid labile subunit_A0A3P9D7H5	0.790342	0.66357	0.126771	0.00230412	0.0151579	0.309757
Actin-related protein 2/3 complex subunit 1A_A0A3P9D7I3	-0.130868	-0.100316	-0.0305521	0.161909	0.228767	0.665282
RNA helicase_A0A3P9D871;A0A3P9AX76;A0A3P9D7I4;A0A3P9AX62	-0.0749311	-0.0870805	0.0121495	0.318255	0.27171	0.742826
Superoxide dismutase [Cu-Zn]_A0A3P9D7I9	0.849011	0.927936	-0.0789247	0.0703292	0.0510989	0.806031
40S ribosomal protein S6_A0A3P9D7M2	-0.0456684	-0.0815494	0.0358811	0.581718	0.218888	0.569961
Thrombomodulin_A0A3P9D7N9	0.123493	0.325767	-0.202274	0.449399	0.0447301	0.0656778
Synaptic vesicle membrane protein VAT-1 homolog_A0A3P9D7P8	0.152147	0.233542	-0.081395	0.149386	0.0686306	0.253862
40S ribosomal protein S17_A0A3P9D7Q4	-0.221386	-0.207989	-0.013397	0.00803375	0.00414601	0.803848
DELTA-sagatoxin-Srs1a_A0A3P9D7S0	-0.32292	-0.418132	0.0952121	0.15968	0.0644472	0.739647
116 kDa U5 small nuclear ribonucleoprotein component_A0A3P9D7S6	0.0640525	0.0183405	0.0457121	0.25212	0.716118	0.239204
NACHT domain-containing protein_A0A3P9D928;A0A3P9D7U3;A0A3P9DTH0;A0A3P9CMJ4	0.0510495	0.181679	-0.130629	0.411602	0.0544203	0.0967609
LIM and SH3 domain protein 1_A0A3P9BHA8;A0A3P9BHV5;A0A3P9D7Y1;A0A3P9BHB1	-0.0479411	-0.006433	-0.0415081	0.381844	0.80355	0.404314
Signal transducer and activator of transcription_A0A3P9D8M6;A0A3P9D8N4;A0A3P9D7Z1	0.0433114	0.125781	-0.0824696	0.42069	0.038297	0.122778
Mannose receptor C type 2_A0A3P9D800	0.15049	0.242228	-0.0917377	0.412199	0.15965	0.29427
AP-2 complex subunit alpha_A0A3P9D811	0.210985	0.120616	0.0903689	0.0692868	0.166655	0.184195
Cathepsin X_A0A3P9D9C1;A0A3P9D821;A0A3P9D805;A0A3P9D8M0	0.0838668	0.0892761	-0.0054093	0.462745	0.23139	0.964101
Retinol saturase_A0A3P9D9R2;A0A3P9D824	0.102986	0.184131	-0.0811453	0.153973	0.0202746	0.23392
Lysine ketoglutarate reductase_A0A3P9D8C2;A0A3P9D909	0.119854	0.103803	0.0160515	0.152828	0.0902823	0.76002
UV excision repair protein RAD23_A0A3P9D9N7;A0A3P9D8F0	0.28181	0.20131	0.0804997	0.0633912	0.140021	0.291619
Ribosomal protein L4_A0A3P9D8F9	-0.0640026	-0.0432716	-0.020731	0.460333	0.538653	0.788185
Bryoporin_A0A3P9D8G4	-0.19897	-0.274242	0.0752718	0.184025	0.101998	0.674696
Uncharacterized protein_A0A3P9C4E8;A0A3P9DRT8;A0A3P9DAL0;A0A3P9D168;A0A3P9B315;A0A3P9D8H8;A0A3P9DJ74;A0A3P9AVT5;A0A3P9B1A0;A0A3P9D8H2;A0A3P9DTM4;A0A3P9CF37;A0A3P9DV65;A0A3P9DDL5;A0A3P9DBT7;A0A3P9D0Q6;A0A3P9DAN4;A0A3P9CEB7;A0A3P9CER1;A0A3P9DML7;A0A3P9D102;A0A3P9DBL4;A0A3P9CZH7;A0A3P9DD95;A0A3P9D7D9;A0A3P9ARA9;A0A3P9D249;A0A3P9DCV9;A0A3P9D4S4;A0A3P9CZG8;A0A3P9CZX8;A0A3P9DJC0;A0A3P9DT27;A0A3P9BYW2	0.104555	0.0857267	0.0188284	0.16909	0.155954	0.719265
U1 small nuclear ribonucleoprotein 70 kDa_A0A3P9D8H7	-0.202792	-0.138393	-0.0643996	0.105312	0.158127	0.473324
COMM domain-containing protein 7_A0A3P9D8J2;A0A3P9DP03;A0A3P9D8K4	0.215158	0.25174	-0.0365824	0.059041	0.158847	0.815594
Protein arginine methyltransferase 1_A0A3P9D8J9	-0.0542726	-0.0400417	-0.0142309	0.40391	0.352734	0.819005
Nuclear factor 1_A0A3P9D8K2;A0A3P9D8G9;A0A3P9D8G0;A0A3P9D9S4;A0A3P9D9Q5;A0A3P9DCD3;A0A3P9D916;A0A3P9D8H4	0.257476	0.282166	-0.0246899	0.143728	0.0976504	0.872166
V-type proton ATPase subunit G_A0A3P9D8M8	-0.0316654	-0.0224214	-0.009244	0.514311	0.567853	0.870538
Ubiquitin-fold modifier-conjugating enzyme 1_A0A3P9D8N9	-0.102586	-0.147379	0.0447929	0.184705	0.129819	0.617746
Transcriptional repressor CTCF_A0A3P9D8R6	0.0751793	0.117922	-0.0427426	0.21927	0.0670064	0.510722
2',3'-cyclic-nucleotide 3'-phosphodiesterase_A0A3P9D8T9	0.197204	0.275216	-0.0780124	0.0616997	0.0124608	0.211267
Calcium uniporter regulatory subunit MCUb_A0A3P9D8U8	-0.0567544	-0.0748321	0.0180777	0.410874	0.180958	0.779609
Ankyrin repeat and FYVE domain containing 1_A0A3P9D924	0.0704242	0.106315	-0.0358905	0.0916094	0.0817079	0.364064
Guanine nucleotide-binding protein subunit alpha-13_A0A3P9D8D2;A0A3P9D925	-0.0926187	-0.0343271	-0.0582916	0.0971456	0.278508	0.20369
Calcium-transporting ATPase_A0A3P9D9H6;A0A3P9D945	-0.0234877	0.138716	-0.162204	0.658034	0.07858	0.0458798
Integrin beta_A0A3P9D951	-0.112481	-0.235981	0.1235	0.502205	0.220732	0.593201
Eukaryotic translation initiation factor 3 subunit D_A0A3P9D962;A0A3P9DC01;A0A3P9D9J1	0.121243	0.043673	0.0775704	0.134705	0.409555	0.25307
Protein phosphatase methylesterase 1_A0A3P9D9S8;A0A3P9D969	0.261382	0.219955	0.0414267	0.0127517	0.00827657	0.541971
Prohibitin_A0A3P9D9B3	-0.0461196	0.0283648	-0.0744844	0.30404	0.430517	0.0319766
Small monomeric GTPase_A0A3P9D8L5;A0A3P9AQY1;A0A3P9D9C4	0.00115394	0.00939469	-0.00824075	0.988068	0.542704	0.913164
Aminopeptidase like 1_A0A3P9D9E7	-0.161144	-0.119513	-0.0416311	0.0755883	0.127365	0.596753
Chromobox protein homolog 1_A0A3P9BLK1;A0A3P9BME2;A0A3P9D9F0	-0.0251085	-0.0514604	0.0263519	0.744566	0.412381	0.786663
Calpain small subunit 1_A0A3P9D9G8	-0.292128	-0.179228	-0.1129	0.0955855	0.186363	0.334741
Coatomer subunit zeta_A0A3P9D9H3;A0A3P9D9G9;A0A3P9DA72;A0A3P9DA65	0.101338	0.138863	-0.0375249	0.426687	0.334745	0.692592
Nuclear GTPase SLIP-GC_A0A3P9D9J3;A0A3P9DAJ3;A0A3P9DB63;A0A3P9D9K3	0.432453	0.38926	0.0431921	0.0110857	0.0063426	0.677682
Clathrin heavy chain_A0A3P9C5A9;A0A3P9BUE4;A0A3P9D9N1;A0A3P9D9N6;A0A3P9C4U9;A0A3P9C5J5;A0A3P9DB01;A0A3P9BUF0;A0A3P9BUH0;A0A3P9D9B6	-0.0530829	-0.0340688	-0.0190141	0.312816	0.441192	0.512769
Uncharacterized LOC101483992_A0A3P9D9P2	0.158278	0.131884	0.0263941	0.00708419	0.00318189	0.457172
Transgelin_A0A3P9CF12;A0A3P9D9P8;A0A3P9DAC1	0.0767925	0.109197	-0.0324048	0.396042	0.196178	0.547436
Dolichyl-diphosphooligosaccharide--protein glycotransferase_A0A3P9D9S6	0.0724531	-0.000313193	0.0727663	0.374081	0.996663	0.251482
Vacuolar proton pump subunit B_A0A3P9D9W9;A0A3P9BAC9	0.00669907	0.00991626	-0.00321718	0.926799	0.914054	0.977663
Nuclear GTPase SLIP-GC_A0A3P9DB46;A0A3P9DAP8;A0A3P9D9X0;A0A3P9DBC9	0.498089	0.421736	0.0763525	0.0287831	0.0427337	0.326638
NCCRP1, F-box associated domain containing_A0A3P9D9Y1	-0.356629	-0.263108	-0.0935206	0.0229361	0.0633973	0.459522
Adenosine aminohydrolase_A0A3P9D9Y2	-0.162794	-0.16157	-0.00122395	0.56897	0.409605	0.996674
Migration and invasion enhancer 1_A0A3P9D9Z9	-0.0760579	-0.0454454	-0.0306125	0.52698	0.680893	0.471049
Serine/threonine-protein phosphatase_A0A3P9D905;A0A3P9DAQ6;A0A3P9DA07	-0.114817	-0.147888	0.0330712	0.216819	0.0285431	0.686184
NDUFA4 mitochondrial complex associated_A0A3P9DA20	-0.0663768	-0.0956624	0.0292856	0.646841	0.430333	0.81802
Elongation factor 1-delta_A0A3P9DBS1;A0A3P9DA44	0.211636	0.132389	0.079247	0.168439	0.140966	0.531919
60S ribosomal protein L17_A0A3P9DA45;A0A3P9DAR5	-0.0995429	-0.0837772	-0.0157657	0.0791633	0.13546	0.775693
Complement component 1 Q subcomponent-binding protein, mitochondrial_A0A3P9DA55	-0.0947988	-0.126663	0.0318638	0.278545	0.113048	0.677054
NACHT domain-containing protein_A0A3P9DA56;A0A3P9D4Q1;A0A3P9AS81;A0A3P9D1Y4;A0A3P9ARU2;A0A3P9DDK0;A0A3P9D5E3;A0A3P9D420;A0A3P9DGT8;A0A3P9B079	-0.0484841	-0.0306893	-0.0177948	0.516261	0.614041	0.768313
Mannosyl-glycoprotein endo-beta-N-acetylglucosaminidase_A0A3P9DA81	0.252685	0.411668	-0.158984	0.0343757	0.00355843	0.0146119
Beta-centractin_A0A3P9DA98;A0A3P9DA62	0.0071156	0.0638586	-0.056743	0.879873	0.0846407	0.258016
Asparagine--tRNA ligase_A0A3P9DAA8	-0.100035	-0.0512767	-0.0487579	0.0651344	0.351395	0.253628
Succinate--CoA ligase [ADP/GDP-forming] subunit alpha, mitochondrial_A0A3P9DB93;A0A3P9DAC2	-0.0296209	0.0362368	-0.0658577	0.321601	0.409501	0.160888
Sepiapterin reductase_A0A3P9DAC8	0.15016	-0.0243181	0.174478	0.647896	0.94117	0.562492
Uncharacterized LOC101479162_A0A3P9DAD3	0.0816918	0.153545	-0.0718528	0.610105	0.310463	0.384958
Hydroxysteroid dehydrogenase like 2_A0A3P9DAD6	-0.141498	-0.0225008	-0.118998	0.0432599	0.630406	0.006607
Hypoxia up-regulated 1_A0A3P9DAH1;A0A3P9DAZ9	0.173302	0.105417	0.067885	0.174553	0.240027	0.523593
Coronin_A0A3P9DAI9;A0A3P9D8T6	0.194835	0.151307	0.0435274	0.00561432	0.014716	5.72718e-05
ATP synthase subunit_A0A3P9DAL8	-0.0101431	-0.0342957	0.0241526	0.866652	0.691897	0.73172
RuvB-like helicase_A0A3P9DAM4	0.14133	0.155818	-0.0144879	0.038832	0.191664	0.893983
60S ribosomal protein L9_A0A3P9DAQ9;A0A3P9DCE3	-0.0528946	-0.0711281	0.0182336	0.549771	0.261964	0.803506
Mimecan_A0A3P9DAR4	-0.0195071	0.249835	-0.269342	0.940407	0.231808	0.161201
RNA-binding protein 39_A0A3P9DAT0	0.0706184	0.0287032	0.0419153	0.477237	0.703673	0.721653
Collagen-binding protein_A0A3P9DBE1	0.171024	0.0466757	0.124348	0.35786	0.811495	0.0979853
14-3-3 protein gamma-1_A0A3P9DBF2;A0A3P9BNR2	0.176915	0.290688	-0.113773	0.400052	0.107738	0.590516
Acetyl-CoA acetyltransferase 1_A0A3P9DBG8	-0.0525549	0.0189037	-0.0714586	0.752302	0.899881	0.732409
Rab GDP dissociation inhibitor_A0A3P9DBI1;A0A3P9D9U6	0.10966	0.183417	-0.073757	0.465976	0.147464	0.59808
Septin-9_A0A3P9DCI1;A0A3P9C5D8;A0A3P9DBJ0;A0A3P9DC09;A0A3P9C4C2;A0A3P9C5E3;A0A3P9C4W4	0.191509	0.156411	0.0350983	0.0473559	0.0659615	0.660378
Non-specific serine/threonine protein kinase_A0A3P9DPZ7;A0A3P9DPQ1;A0A3P9DR33;A0A3P9C854;A0A3P9DBK4;A0A3P9BAA9	-0.0643546	-0.0118326	-0.0525219	0.63813	0.838804	0.685501
SAP domain containing ribonucleoprotein_A0A3P9DBP1	0.000252965	-0.110803	0.111056	0.99515	0.0255453	0.08627
Vacuolar protein sorting-associated protein 35_A0A3P9DBV2	0.0603857	0.0789255	-0.0185398	0.0542102	0.00629434	0.354872
V-type proton ATPase subunit H_A0A3P9DCD6;A0A3P9DBX5	0.17055	0.114153	0.0563976	0.0726787	0.0744339	0.506246
Thioredoxin like 1_A0A3P9DBZ1	-0.161788	-0.209628	0.0478397	0.164221	0.0315284	0.685837
Beta-glucuronidase_A0A3P9DC15	0.430821	0.298831	0.13199	0.524209	0.618404	0.847179
Plasma protease C1 inhibitor_A0A3P9DC21	1.69628	1.54918	0.147104	0.0462704	0.0333503	0.720737
Peptidylprolyl isomerase_A0A3P9DC26	0.122129	0.0761343	0.0459949	0.0942285	0.287154	0.248997
Choline transporter-like protein 1_A0A3P9DC30	-0.0311196	0.143523	-0.174643	0.871243	0.35572	0.365928
Ribosomal protein L32_A0A3P9DC40	-0.147542	-0.161055	0.0135127	0.25926	0.220009	0.836211
Retinoic acid receptor RXR-beta-A_A0A3P9BJA0;A0A3P9DDB6;A0A3P9C7B5;A0A3P9DC84;A0A3P9DCR6;A0A3P9C6W7;A0A3P9C6U4;A0A3P9BJ88;A0A3P9CG12	0.13696	0.0305775	0.106383	0.106218	0.665016	0.22724
Heat shock cognate 71 kDa protein_A0A3P9CVG6;A0A3P9DM96;A0A3P9DLS9;A0A3P9DM40;A0A3P9DM03;A0A3P9DLB3;A0A3P9CVP3;A0A3P9C2H1;A0A3P9DLH9;A0A3P9DLC0;A0A3P9DC91;A0A3P9DMR6;A0A3P9B9R0;A0A3P9BFR4;A0A3P9DJM6;A0A3P9DM61;A0A3P9AVW9;A0A3P9DMB9	-0.162219	-0.122351	-0.0398675	0.0295877	0.0733429	0.59703
UDP-glucose 6-dehydrogenase_A0A3P9DCA3;A0A3P9DBN4	0.445336	0.50212	-0.056785	0.0156481	0.00328182	0.543981
PDS5 cohesin associated factor A_A0A3P9DCB2	-0.00601242	-0.0261609	0.0201485	0.846557	0.299909	0.520732
Trehalase_A0A3P9DCC9	0.723678	0.680846	0.042832	0.0299882	0.0509529	0.862266
Vacuolar protein sorting-associated protein 26B-like_A0A3P9DCD2;A0A3P9BA77	0.146618	0.0576699	0.0889482	0.161088	0.578506	0.310874
14-3-3 protein beta/alpha_A0A3P9DCE8	-0.170802	-0.102581	-0.0682209	0.131147	0.0387637	0.526436
26S proteasome non-ATPase regulatory subunit 8_A0A3P9DCM3	-0.0416566	-0.00534213	-0.0363144	0.328648	0.867703	0.491794
Prolylcarboxypeptidase_A0A3P9DCM6	0.258139	0.20233	0.0558094	0.0647033	0.126672	0.626096
Ecm29 proteasome adaptor and scaffold_A0A3P9DCR5	-0.0756783	-0.00618804	-0.0694902	0.443683	0.896293	0.488429
Caveolae-associated protein 1_A0A3P9DCS1;A0A3P9D7B7;A0A3P9D7X2;A0A3P9DC93	0.366919	0.394821	-0.0279023	0.0680948	0.0751518	0.860697
Eukaryotic translation initiation factor 3 subunit F_A0A3P9DCT8	-0.0632743	-0.0563285	-0.00694579	0.0292518	0.0217468	0.675142
Heterogeneous nuclear ribonucleoprotein C_A0A3P9DCZ4;A0A3P9CZC1;A0A3P9DDH0;A0A3P9CZP4	0.25756	0.203235	0.0543248	0.0169218	0.00173382	0.420142
Coatomer subunit alpha_A0A3P9DE73;A0A3P9DD55	0.0622986	0.0349473	0.0273513	0.338839	0.480313	0.549816
Protein phosphatase 1 regulatory subunit 13 like_A0A3P9DDA2	-0.309855	-0.242713	-0.0671418	0.0292696	0.0581201	0.425435
Heterogeneous nuclear ribonucleoprotein U like 1_A0A3P9DDA8	-0.032769	-0.0308876	-0.00188139	0.513895	0.408048	0.956063
Periostin_A0A3P9DDH4	1.25259	0.905136	0.347452	0.0495983	0.260987	0.504297
Suppression of tumorigenicity 14_A0A3P9DDI4;A0A3P9DE52	-0.305507	-0.234943	-0.0705636	0.00144031	0.0167664	0.403432
Vimentin_A0A3P9DDJ1	-0.0964456	-0.196942	0.100496	0.41723	0.080913	0.517282
Medium-chain specific acyl-CoA dehydrogenase, mitochondrial_A0A3P9DDK5;A0A3P9DEI8	0.0206911	0.0288642	-0.00817309	0.694159	0.757482	0.921639
Myeloid-associated differentiation marker homolog_A0A3P9DDL2;A0A3P9DCP5;A0A3P9DD70	0.335037	0.525189	-0.190152	0.105188	0.0703439	0.343198
Calreticulin_A0A3P9DDM0;A0A3P9B7A6;A0A3P9B732	0.00385279	0.031486	-0.0276332	0.945917	0.664271	0.679127
Transcription factor BTF3_A0A3P9DDN8	-0.128511	0.0113457	-0.139857	0.20024	0.85636	0.169841
Glutaminyl-tRNA synthetase_A0A3P9DE93;A0A3P9DDP2	-0.0974397	-0.0981481	0.000708396	0.124031	0.0708254	0.989162
Poly(U)-specific endoribonuclease_A0A3P9DDP4	-0.0854515	-0.0699746	-0.015477	0.299116	0.0985376	0.837886
SUMO1 activating enzyme subunit 1_A0A3P9DDR4;A0A3P9DF98	0.0863015	0.158734	-0.0724326	0.146771	0.000398996	0.192071
NADH dehydrogenase [ubiquinone] flavoprotein 2, mitochondrial_A0A3P9DDR7	-0.226259	-0.121987	-0.104273	0.0176874	0.0158439	0.15848
Myelin protein zero_A0A3P9DDW5	-0.00713456	0.591242	-0.598376	0.967236	0.012136	0.0200478
40S ribosomal protein S8_A0A3P9DDY3;A0A3P9DEH9	0.0261641	-0.0178414	0.0440055	0.783679	0.761026	0.652807
Ubiquitin-fold modifier 1_A0A3P9DE05	0.0895117	0.0429919	0.0465198	0.165517	0.580837	0.474791
RAN binding protein 3_A0A3P9DE31;A0A3P9DEG0	0.0443808	0.0556604	-0.0112796	0.41945	0.178033	0.848682
Tubulin alpha chain_A0A3P9DDJ3;A0A3P9DAZ3;A0A3P9DBN2;A0A3P9DE37	0.108011	0.182137	-0.0741261	0.0502798	0.00812414	0.0893963
VAMP associated protein A_A0A3P9DE56	-0.121386	-0.012453	-0.108933	0.00260551	0.609829	0.00875965
Biliverdin reductase B_A0A3P9DE68;A0A3P9DF52	0.370971	0.368711	0.00225976	0.0186546	0.0173591	0.984478
EH domain containing 2_A0A3P9DE71	0.409125	0.448623	-0.0394984	0.0639291	0.0398449	0.783265
NSF attachment protein alpha_A0A3P9DQT7;A0A3P9DE97;A0A3P9BWM1;A0A3P9BWA2;A0A3P9DDN2;A0A3P9DR58	0.212804	0.195339	0.0174653	0.00703106	0.00119125	0.687044
2-oxoisovalerate dehydrogenase subunit alpha_A0A3P9DEA2	-0.170139	-0.106185	-0.0639531	0.00119122	0.01436	0.135978
Mixed lineage kinase domain-like protein_A0A3P9DEB9	0.32119	0.463411	-0.142221	0.0237759	0.0037834	0.0453982
Calpain-9_A0A3P9DEF4	-0.233536	-0.265099	0.0315628	0.367476	0.325423	0.838394
Eukaryotic translation initiation factor 3 subunit K_A0A3P9DFX6;A0A3P9DEF8	-0.0626535	-0.0725771	0.00992358	0.256021	0.105124	0.828667
Echinoderm microtubule-associated protein-like 2_A0A3P9DEG9	-0.0649825	-0.0332834	-0.0316991	0.644653	0.747464	0.800512
DNA-(apurinic or apyrimidinic site) lyase_A0A3P9DG28;A0A3P9DEH2	-0.0981183	-0.0862271	-0.0118911	0.0569552	0.0714884	0.392956
AP-1 complex subunit mu-1_A0A3P9DEI4	0.0940383	0.0955078	-0.00146951	0.0814182	0.132177	0.981559
Far upstream element binding protein 1_A0A3P9DEN6;A0A3P9DEM0	-0.0588851	-0.0195908	-0.0392943	0.271414	0.675458	0.141075
Latent transforming growth factor beta binding protein 4_A0A3P9DEM2	1.06698	0.897487	0.169496	0.00919712	0.0259005	0.476633
Thioredoxin domain-containing protein 12_A0A3P9DEM5	0.212468	0.216715	-0.00424683	0.00237998	0.0145842	0.93433
Claudin-4_A0A3P9DEP5	0.11913	0.0969796	0.0221499	0.55406	0.659492	0.927619
Receptor protein-tyrosine kinase_A0A3P9DEP6	0.472178	0.265088	0.20709	0.444034	0.522444	0.705832
Calpain-1 catalytic subunit-like_A0A3P9DG87;A0A3P9DG91;A0A3P9DER0;A0A3P9DEQ1;A0A3P9DFC6;A0A3P9DGA4	0.0434922	0.0598067	-0.0163145	0.791673	0.548421	0.903523
Heterogeneous nuclear ribonucleoprotein L_A0A3P9DFS5;A0A3P9D9Z4;A0A3P9DAJ8;A0A3P9DEV4;A0A3P9DF67;A0A3P9DFT0	-0.00488851	0.0200991	-0.0249876	0.932673	0.646412	0.649576
Non-specific serine/threonine protein kinase_A0A3P9DFJ3;A0A3P9B1S0;A0A3P9CX95;A0A3P9DFH3;A0A3P9B1X3;A0A3P9CY22;A0A3P9DEW2	-0.0116102	0.0264495	-0.0380597	0.908558	0.524629	0.708533
Periostin_A0A3P9DF11;A0A3P9DDH4	1.87493	1.66486	0.210072	0.0282963	0.0897219	0.649673
Tropomyosin alpha-1 chain_A0A3P9DEH8;A0A3P9D7A1;A0A3P9DF43;A0A3P9DF49;A0A3P9CLU8;A0A3P9BRE9;A0A3P9BQV0;A0A3P9D797;A0A3P9BRB2;A0A3P9BS67;A0A3P9BQT7;A0A3P9DL96;A0A3P9D637;A0A3P9BQF4;A0A3P9BQG0;A0A3P9D7I0;A0A3P9BQE1;A0A3P9BRB6;A0A3P9BQD6	0.0516024	0.0145016	0.0371008	0.391825	0.775611	0.384264
Sulfotransferase_A0A3P9DGT5;A0A3P9DF78	0.337848	0.344631	-0.00678273	0.104147	0.0528112	0.967385
Adipogenesis associated Mth938 domain containing_A0A3P9DFB8	0.241191	0.119409	0.121782	0.156989	0.225951	0.351661
Calpain small subunit 1_A0A3P9DFE4	-0.223858	-0.0300524	-0.193806	0.0208902	0.570355	0.0117141
ATP synthase subunit g, mitochondrial_A0A3P9DFH9	-0.178555	-0.0972816	-0.0812736	0.0987792	0.120321	0.409077
Enoyl-CoA delta isomerase 1, mitochondrial-like_A0A3P9DFS6;A0A3P9DGD6;A0A3P9DFU7;A0A3P9DFJ7	0.182655	0.22479	-0.0421347	0.408816	0.282089	0.729345
Parathion hydrolase-related protein_A0A3P9DFK8	0.159773	0.227073	-0.0673	0.40225	0.229766	0.63893
Guanylate kinase_A0A3P9DFL1	-0.00932878	0.0367464	-0.0460752	0.724319	0.355208	0.277843
High mobility group protein B1_A0A3P9BXK7;A0A3P9DFP7	-0.102253	-0.0492463	-0.0530063	0.549804	0.510218	0.766416
Arrestin beta 2_A0A3P9DFR0;A0A3P9DEV0	0.134446	0.186893	-0.0524473	0.0103279	0.00810386	0.247411
Ubiquitin carboxyl-terminal hydrolase_A0A3P9DFU2	-0.0353537	-0.0358528	0.000499107	0.686808	0.497129	0.995772
Alpha-actinin-4_A0A3P9DFZ8;A0A3P9D159;A0A3P9BWA1;A0A3P9BWW9;A0A3P9DEZ9;A0A3P9D1E4;A0A3P9DEE9	-0.154008	-0.0824983	-0.0715097	0.0544392	0.0851547	0.326569
Alpha-2-antiplasmin-like_A0A3P9DG05	0.836612	0.774332	0.0622794	0.00183162	0.000520243	0.512846
Leukocyte elastase inhibitor_A0A3P9DG62	0.0160389	0.321568	-0.305529	0.83126	0.0258816	0.0469885
Protein S100_A0A3P9DG88	-0.281182	-0.41342	0.132238	0.251327	0.129631	0.265251
Methionine adenosyltransferase 2 subunit beta_A0A3P9DV85;A0A3P9DGA1	-0.0495673	-0.0485808	-0.000986459	0.53086	0.521634	0.990655
Histone H1_A0A3P9DGB7	0.0517549	0.0178215	0.0339334	0.547936	0.855455	0.57388
Fibrillarin_A0A3P9DGC4	-0.0521931	-0.0366097	-0.0155834	0.32284	0.453401	0.672419
NACHT domain-containing protein_A0A3P9DKW5;A0A3P9DGH3	0.134848	0.0660399	0.0688079	0.430499	0.696023	0.089603
Serine/arginine-rich splicing factor 11_A0A3P9DGH8	0.0122274	0.00477545	0.00745195	0.881025	0.932183	0.901981
Chaperonin containing TCP1 subunit 6A_A0A3P9DGM9	-0.0298734	-0.0398595	0.0099861	0.793307	0.525453	0.931849
NACHT domain-containing protein_A0A3P9DL32;A0A3P9DGQ0	-0.179556	-0.0629296	-0.116626	0.0617952	0.316774	0.135403
Desmoglein-2_A0A3P9DGR1	0.0125811	0.0742134	-0.0616323	0.918299	0.523926	0.708149
Desmocollin-2_A0A3P9DGR6	-0.155805	-0.140741	-0.0150636	0.00495865	0.104329	0.832077
Proteasome subunit alpha type_A0A3P9DGT4	0.0116236	0.0430383	-0.0314147	0.805105	0.432263	0.640487
Dolichyl-diphosphooligosaccharide--protein glycotransferase_A0A3P9DGU8;A0A3P9DKY3;A0A3P9DIH8	0.137265	0.153196	-0.0159315	0.192388	0.0832939	0.877372
Serpin family F member 1_A0A3P9DGV2	0.903189	0.922378	-0.0191887	0.0244598	0.0181337	0.930085
Prefoldin subunit 1_A0A3P9DGW9	0.273391	0.148751	0.12464	0.190666	0.346894	0.562062
Desmoplakin_A0A3P9DGZ2	-0.12426	-0.106976	-0.0172847	0.0106928	0.207292	0.840358
Polyadenylate-binding protein_A0A3P9DNM3;A0A3P9DBQ1;A0A3P9DCF4;A0A3P9DIH6;A0A3P9DGZ3	-0.012444	-0.00348537	-0.0089586	0.906529	0.963004	0.938994
Ribosomal protein S14_A0A3P9DH04	-0.137644	-0.161778	0.0241344	0.154905	0.0282399	0.802935
NADH dehydrogenase [ubiquinone] 1 alpha subcomplex subunit 2_A0A3P9DH22	-0.253372	-0.157326	-0.0960456	0.0118584	0.00568743	0.237018
ADP ribosylation factor 1_A0A3P9D6W9;A0A3P9DH75;A0A3P9D879	0.0395624	0.0851807	-0.0456183	0.44058	0.0781572	0.371374
Aldehyde dehydrogenase 2 family member_A0A3P9DH85	0.280122	0.351576	-0.0714538	0.127345	0.0134254	0.621025
Si:ch211-241e1.3_A0A3P9DHS2	0.178673	-0.0943699	0.273043	0.380257	0.43292	0.223437
Vesicle-fusing ATPase_A0A3P9DHS6	-0.147606	-0.0362802	-0.111326	0.0331174	0.624854	0.174578
Vitronectin_A0A3P9DHU1	1.27675	0.945037	0.33171	0.0415705	0.00848804	0.331595
Serotransferrin_A0A3P9DH44;A0A3P9DI00	0.959157	0.806484	0.152673	0.0150295	0.00390069	0.397698
Eukaryotic translation initiation factor 4 gamma 1_A0A3P9DIL5;A0A3P9DI18	0.290214	0.108417	0.181796	0.174384	0.307794	0.368098
V-type proton ATPase subunit C_A0A3P9DI29;A0A3P9B8V2;A0A3P9DI58	-0.077387	-0.112844	0.0354574	0.58022	0.293662	0.80045
Protein LYRIC_A0A3P9DI43	0.438194	0.340557	0.0976361	0.0331758	0.00674402	0.460652
Tubulin beta chain_A0A3P9DI89	0.547977	0.717389	-0.169412	0.0754394	0.0203574	0.467677
14-3-3 protein zeta/delta_A0A3P9DIH3	-0.272081	-0.208282	-0.0637989	0.000476385	0.0147721	0.284764
Cold inducible RNA binding protein_A0A3P9DIP0;A0A3P9DII6	-0.129672	-0.244065	0.114392	0.44003	0.197144	0.0212907
Protein phosphatase 1 regulatory subunit 7_A0A3P9DIS8	0.16857	0.169745	-0.00117446	0.00929262	0.0564536	0.98227
Cellular nucleic acid-binding protein_A0A3P9DIT4	-0.0453796	-0.0747791	0.0293996	0.496217	0.243274	0.550644
Glypican-1_A0A3P9DIC3;A0A3P9DIE5;A0A3P9DIY0	-0.156877	-0.169398	0.0125211	0.299093	0.149036	0.925437
Ig-like domain-containing protein_A0A3P9DHF0;A0A3P9DJ58;A0A3P9DHU4;A0A3P9DJ19;A0A3P9DHE0;A0A3P9DIZ6;A0A3P9DID2;A0A3P9DJM4	1.6773	1.59969	0.0776167	0.000183293	0.00209442	0.569377
Nascent polypeptide associated complex subunit alpha_A0A3P9DL15;A0A3P9DL11;A0A3P9DKZ3;A0A3P9DJB6	-0.202572	-0.174124	-0.0284479	0.0781886	0.0424025	0.760223
AIG1-type G domain-containing protein_A0A3P9DJD1	-0.0198457	-0.0651699	0.0453242	0.809464	0.616652	0.691834
Splicing factor proline and glutamine rich_A0A3P9DJF7;A0A3P9DKK2	0.0983288	0.0543939	0.0439349	0.165138	0.40392	0.508628
Elongation factor 1-alpha_A0A3P9C5B1;A0A3P9DQD9;A0A3P9DJI1;A0A3P9DL56;A0A3P9DKM7	-0.142321	-0.119335	-0.0229859	0.159278	0.119143	0.817373
Keratin, type II cytoskeletal 8_A0A3P9DJN4;A0A3P9DPD6;A0A3P9DPS9;A0A3P9BJR5;A0A3P9C1K6;A0A3P9DMW8	-0.173403	-0.227031	0.0536276	0.108933	0.00205237	0.614411
Poly(rC)-binding protein 2_A0A3P9CE77;A0A3P9CK47;A0A3P9CE59;A0A3P9CN16;A0A3P9CLI6;A0A3P9DJS0;A0A3P9CKP1;A0A3P9CE71;A0A3P9CLI3;A0A3P9DKT3;A0A3P9CMQ8;A0A3P9CLJ0	-0.0631751	-0.0563663	-0.00680879	0.247814	0.332495	0.834012
Tapasin_A0A3P9DK34	-0.00942914	0.0499942	-0.0594234	0.936047	0.731373	0.741247
Palmitoyl-protein hydrolase 1_A0A3P9DKE4	0.199747	0.182939	0.0168084	0.034254	0.050804	0.802379
Prostaglandin E synthase 3_A0A3P9DKY8;A0A3P9DKG0	-0.117794	-0.0782433	-0.039551	0.013286	0.179039	0.40604
Prolyl endopeptidase_A0A3P9DKI6	-0.112172	-0.0872172	-0.0249552	0.127673	0.198519	0.339974
Non-histone chromosomal protein HMG-14A_A0A3P9D7H4;A0A3P9DKM0	-0.11558	-0.00807908	-0.107501	0.498153	0.957994	0.383387
Glucose-6-phosphate 1-dehydrogenase_A0A3P9DKM2	0.154089	0.208107	-0.0540185	0.0850124	0.0123736	0.437388
Microtubule-actin cross-linking factor 1_A0A3P9DKY0;A0A3P9DLE8;A0A3P9DKW3;A0A3P9DLD8;A0A3P9DKU4;A0A3P9DLD3;A0A3P9DLF4;A0A3P9DKU6	0.212438	0.0630868	0.149351	0.264868	0.785222	0.334906
Prostate stem cell antigen_A0A3P9DKU5	-0.200384	-0.11956	-0.0808238	0.0763811	0.419557	0.627278
Plectin_A0A3P9DKY0;A0A3P9DLE8;A0A3P9DKW3;A0A3P9DLD8;A0A3P9DLD3;A0A3P9DLF4;A0A3P9DKU6	0.170361	0.0970611	0.0732998	0.240099	0.550903	0.43313
Carnitine O-acetyltransferase_A0A3P9DKV5	0.124889	0.164127	-0.0392378	0.226201	0.175006	0.665348
Tetranectin_A0A3P9DKX2	-0.0456679	-0.120597	0.0749293	0.913827	0.761082	0.80703
Myelin basic protein_A0A3P9DL55;A0A3P9DKY9;A0A3P9DKZ4;A0A3P9DLK0	-0.113173	0.302617	-0.41579	0.506401	0.0104535	0.0357566
RNA helicase_A0A3P9DL30	0.160549	0.192666	-0.0321169	0.0839584	0.110801	0.769687
Lysophospholipase 2_A0A3P9DL35;A0A3P9DJG6	0.017475	0.0571571	-0.0396821	0.750753	0.463977	0.625646
60S ribosomal protein L11_A0A3P9DL42	-0.106673	-0.11425	0.00757691	0.206087	0.0607075	0.911069
Lamin-A_A0A3P9DL70	0.178826	0.255282	-0.0764561	0.349078	0.210013	0.329829
Chitinase_A0A3P9DL81;A0A3P9DLF2	0.754955	0.606432	0.148522	0.0803178	0.0468416	0.594051
Filamin A, alpha (actin binding protein 280)_A0A3P9DL82	0.155115	0.201409	-0.0462948	0.0268872	0.0206133	0.427003
Protein S100_A0A3P9DL93	0.000619973	-0.0347236	0.0353436	0.99595	0.710059	0.730088
Translation initiation factor IF-2_A0A3P9DLB2	-0.0964021	0.0932425	-0.189645	0.459946	0.276241	0.0821032
Cathepsin C_A0A3P9DLE1	-0.0660062	-0.0839579	0.0179518	0.40521	0.119258	0.825454
Apolipoprotein Eb_A0A3P9DLE7	-0.363815	-0.604212	0.240397	0.479839	0.260009	0.592881
Proteasome subunit beta_A0A3P9DLG3	-0.0912064	-0.0467225	-0.0444839	0.0301672	0.33445	0.29417
Epiplakin 1_A0A3P9DLG4	-0.256408	-0.0529267	-0.203482	0.253519	0.656478	0.347371
Thiopurine S-methyltransferase_A0A3P9DLG8	0.465198	0.427192	0.0380058	0.21299	0.228676	0.918448
Heterogeneous nuclear ribonucleoprotein K_A0A3P9B7U2;A0A3P9B7S3;A0A3P9DLH0	-0.0991954	-0.0705337	-0.0286617	0.0478076	0.0906197	0.307471
Adenylyl cyclase-associated protein_A0A3P9DLM9	-0.0824423	0.00863875	-0.091081	0.0495148	0.818079	0.053722
PRA1 family protein_A0A3P9DLR0	0.0483318	0.172315	-0.123983	0.410872	0.0264908	0.0701584
Apolipoprotein A-I_A0A3P9DLS6	1.38561	1.13666	0.248943	0.00877072	0.0286397	0.374846
Exo-alpha-sialidase_A0A3P9DME4;A0A3P9DLU5;A0A3P9DM26	0.361722	0.3323	0.0294223	0.0131476	0.00635472	0.725818
Tyrosine-protein phosphatase non-receptor type_A0A3P9DLV9	0.11867	0.0410122	0.077658	0.116856	0.613381	0.4134
Ubiquitin-conjugating enzyme E2 variant 1_A0A3P9DLW2;A0A3P9DM48	-0.135408	-0.0552495	-0.0801585	0.0353131	0.122996	0.0811417
Family with sequence similarity 120C_A0A3P9DNA1;A0A3P9DLX0	0.00422338	-0.000125833	0.00434922	0.919604	0.997348	0.855815
CUB domain-containing protein 1_A0A3P9DM65;A0A3P9DKW7;A0A3P9DLX2	-0.0626986	-0.109147	0.0464483	0.0745683	0.0108527	0.124119
Heterogeneous nuclear ribonucleoprotein R_A0A3P9DMD1;A0A3P9DM27	0.108951	0.123231	-0.0142799	0.185774	0.0680654	0.864486
Ribosomal protein S5_A0A3P9DMF8;A0A3P9DM42	-0.183302	-0.155648	-0.0276538	0.00890272	0.00836163	0.619653
Peptidylprolyl isomerase_A0A3P9DM78	0.0382703	0.0871882	-0.0489178	0.618383	0.149137	0.4662
Oxysterol-binding protein_A0A3P9DMI5;A0A3P9DM79;A0A3P9CDR3	0.0595418	-0.0174503	0.0769921	0.413141	0.757602	0.299368
TPD52 like 2_A0A3P9DP28;A0A3P9DM89;A0A3P9DNT9	-0.101181	-0.00502048	-0.0961609	0.32641	0.943207	0.204174
Double-strand-break repair protein rad21 homolog_A0A3P9DMA3	-0.0735803	-0.0677264	-0.00585395	0.424946	0.0691089	0.948721
Citrate synthase_A0A3P9DMM9;A0A3P9DMD6	-0.147362	-0.165291	0.0179287	0.201014	0.136646	0.741597
Chloride intracellular channel protein_A0A3P9DMF3	0.00313393	0.104909	-0.101775	0.95521	0.109591	0.00744414
NADH dehydrogenase [ubiquinone] flavoprotein 1, mitochondrial_A0A3P9DMG2	-0.0667688	-0.0171396	-0.0496291	0.365394	0.608924	0.527266
WD repeat domain 1_A0A3P9DMG4	-0.0712044	-0.0245894	-0.0466149	0.402738	0.533366	0.55978
60S ribosomal protein L10_A0A3P9DM76;A0A3P9DMI9	-0.139603	-0.14927	0.0096662	0.0604993	0.0501531	0.798023
Ictacalcin_A0A3P9DMJ9	0.430088	0.332743	0.0973445	0.129523	0.21649	0.664117
Diacylglycerol kinase_A0A3P9DL19;A0A3P9DMT6	0.0524678	0.0785235	-0.0260557	0.153165	0.064258	0.155458
Alpha-2-macroglobulin_A0A3P9DMU3	0.995504	0.986919	0.00858506	0.00781476	0.00555197	0.938566
Keratin, type II cytoskeletal 8_A0A3P9DPS9;A0A3P9DMW8	-1.56451	-0.295446	-1.26907	0.000781767	0.127416	0.00941759
Cellular retinoic acid-binding protein 2_A0A3P9DMX2	0.0782525	0.523971	-0.445718	0.61429	0.00895186	0.000189024
Brevican core protein_A0A3P9DMX3	2.00415	1.60787	0.396284	0.0339224	0.154841	0.467112
Calponin-homology (CH) domain-containing protein_A0A3P9DN03	0.143719	0.195494	-0.0517748	0.00799959	0.00793085	0.202659
Class I histocompatibility antigen, F10 alpha chain_A0A3P9DPI4;A0A3P9DPX8;A0A3P9DP14;A0A3P9DN58;A0A3P9DNW6;A0A3P9DPS0;A0A3P9DPM7;A0A3P9DPX3;A0A3P9DQ11;A0A3P9DQ01;A0A3P9DN12;A0A3P9DN36	2.67437	2.63454	0.0398341	0.00584221	0.00127453	0.858709
L-rhamnose-binding lectin SML_A0A3P9DN13;A0A3P9DS56	1.30781	1.13986	0.167952	0.0118435	0.00231187	0.434577
26S proteasome non-ATPase regulatory subunit 4_A0A3P9DN16	0.0796948	0.0826382	-0.00294337	0.296174	0.124101	0.957184
MHC_I-like_Ag-recog domain-containing protein_A0A3P9DN58;A0A3P9DNW6	1.99051	1.92654	0.0639683	0.0130903	0.00141999	0.798364
C-1-tetrahydrofolate synthase, cytoplasmic_A0A3P9DN63	0.0541272	0.0112423	0.0428849	0.0913085	0.825869	0.44804
Ras-related protein Rab_A0A3P9DN79;A0A3P9DN70;A0A3P9AX19;A0A3P9AYD3;A0A3P9DE74;A0A3P9DET0;A0A3P9DDB0;A0A3P9AXC8;A0A3P9D2Y6;A0A3P9CMA4	0.1775	0.0594865	0.118014	0.106336	0.257564	0.235607
Septin-type G domain-containing protein_A0A3P9DN75	-0.339932	-0.328506	-0.0114258	0.211921	0.20922	0.94134
Collagen alpha-1(XIV) chain_A0A3P9DN89;A0A3P9DPV6	0.00688201	-0.239069	0.245951	0.899045	0.0471561	0.0275365
Hydroxysteroid 17-beta dehydrogenase 10_A0A3P9DNA6	-0.0396864	0.0785553	-0.118242	0.527143	0.169727	0.16974
Deoxyribonuclease_A0A3P9DP77;A0A3P9DNB2	-0.43263	-0.323686	-0.108944	0.0195736	0.038576	0.297781
Heparin binding growth factor_A0A3P9DNE0	0.168366	0.224461	-0.056095	0.254864	0.0446508	0.673578
Uncharacterized LOC101486494_A0A3P9DNE9	-0.00755964	0.144813	-0.152373	0.946639	0.420288	0.460233
Receptor-type tyrosine-protein phosphatase alpha_A0A3P9DNF2	0.129848	0.0507892	0.0790586	0.094749	0.286161	0.149015
14-3-3 protein beta/alpha-A_A0A3P9DN09;A0A3P9DNH1	-0.401248	-0.251362	-0.149886	0.0171662	0.0798838	0.135426
NOP56 ribonucleoprotein_A0A3P9DNJ1	0.103253	0.0872848	0.0159686	0.150285	0.153965	0.780768
Cytosolic non-specific dipeptidase_A0A3P9DMR8;A0A3P9DNJ3;A0A3P9DNN6;A0A3P9DNF0;A0A3P9DMQ0	-0.309031	-0.223711	-0.0853193	0.00982943	0.0235545	0.0440317
Polyadenylate-binding protein_A0A3P9DNM3	0.226789	0.144765	0.0820242	0.0462903	0.131918	0.356717
Isocitrate dehydrogenase [NAD] subunit, mitochondrial_A0A3P9DNH4;A0A3P9DNP5;A0A3P9DMU1	0.10711	0.122541	-0.0154308	0.441085	0.317406	0.918132
Chromobox 5_A0A3P9DNQ8	0.143797	0.0632702	0.080527	0.486307	0.639001	0.699347
40S ribosomal protein S21_A0A3P9DNU5	-0.0694144	-0.100531	0.0311162	0.0643942	0.0731676	0.492172
Myosin regulatory light polypeptide 9_A0A3P9DNV3	0.341305	0.261195	0.0801101	0.00674382	0.0398143	0.251868
Microtubule-associated protein RP/EB family member 1_A0A3P9DP12;A0A3P9DNW1	-0.0618656	-0.123275	0.0614093	0.702342	0.349495	0.663721
Uncharacterized protein_A0A3P9DNW2	0.396258	0.764522	-0.368264	0.0465713	0.00279036	0.0132586
ADP-ribosylation factor-like protein 8A_A0A3P9BX60;A0A3P9DNW3;A0A3P9CDM0	0.0896522	0.150614	-0.0609623	0.136974	0.142101	0.5251
Calpain inhibitor_A0A3P9DMH6;A0A3P9DMH2;A0A3P9DP26;A0A3P9DNX3;A0A3P9DNF7;A0A3P9DPC1	0.158368	0.286849	-0.128482	0.0530007	0.0221254	0.158738
HECT-type E3 ubiquitin transferase_A0A3P9DNZ5	0.0750945	0.12104	-0.0459453	0.130667	0.0168572	0.144792
Mitogen-activated protein kinase_A0A3P9DP09;A0A3P9DN08	0.0867785	0.000961666	0.0858169	0.287054	0.982809	0.255194
Acetyl-coenzyme A synthetase_A0A3P9DP18	-0.0509279	0.0143694	-0.0652973	0.394577	0.646319	0.280854
Carbonyl reductase [NADPH] 1_A0A3P9DP36	-0.0132212	0.136756	-0.149977	0.937254	0.352917	0.317945
Ribosomal protein lateral stalk subunit P0_A0A3P9DP53	-0.00270424	0.194013	-0.196717	0.974824	0.181474	0.193065
High mobility group protein B2_A0A3P9DP79;A0A3P9DV26	-0.00768731	0.0119731	-0.0196604	0.957814	0.857487	0.898088
KH domain-containing, RNA-binding, signal transduction-associated protein 1_A0A3P9ATJ1;A0A3P9DP86	-0.00597006	-0.0378041	0.0318341	0.944998	0.55672	0.68174
Uncharacterized protein_A0A3P9DP92	-0.0994178	0.0653741	-0.164792	0.155902	0.487596	0.0995636
NCK associated protein 1_A0A3P9DQ54;A0A3P9DP94;A0A3P9DR39	0.0585942	0.067415	-0.00882081	0.316729	0.0817667	0.870421
60S acidic ribosomal protein P0_A0A3P9DP53;A0A3P9DPA1	-0.125678	-0.121394	-0.00428477	0.0580644	0.0462648	0.884507
Isocitrate dehydrogenase [NAD] subunit, mitochondrial_A0A3P9DPB2	0.0657287	0.104682	-0.0389531	0.305696	0.0559759	0.581381
Glutaredoxin_A0A3P9DPD5	-0.308628	-0.18955	-0.119078	0.0985842	0.166957	0.335327
Keratin, type II cytoskeletal 8_A0A3P9DPD6	0.0493175	0.218382	-0.169064	0.904292	0.576506	0.195984
Uncharacterized protein_A0A3P9DPE0;A0A3P9CGC0	-0.386784	-0.273526	-0.113258	0.0166127	0.00620821	0.311509
F-actin-capping protein subunit alpha_A0A3P9DND7;A0A3P9DPE2	-0.00979921	0.0745088	-0.084308	0.431187	0.110682	0.0847655
Eukaryotic translation initiation factor 4B_A0A3P9DPE3;A0A3P9DPI1	0.111936	0.090806	0.02113	0.253743	0.0565614	0.802943
Uncharacterized LOC101478108_A0A3P9DPP9;A0A3P9DPE5	0.748527	0.58112	0.167408	0.0678735	0.0365685	0.531114
Uncharacterized protein_A0A3P9AT55;A0A3P9DNG4;A0A3P9DPF5;A0A3P9AST0;A0A3P9DNG1;A0A3P9DPE6;A0A3P9ARY3;A0A3P9DQD5;A0A3P9AS13	1.23836	1.02095	0.217412	0.0905736	0.0189476	0.59501
40S ribosomal protein S18_A0A3P9DPF0	-0.149238	-0.161711	0.0124724	0.103876	0.0866534	0.907417
Actin-related protein 2_A0A3P9DRA0;A0A3P9DPG4	-0.134303	-0.0892721	-0.0450304	0.0224608	0.124435	0.372268
Uncharacterized protein_A0A3P9DPG7	0.346985	0.771637	-0.424652	0.0757983	0.00316586	0.000817317
RNA helicase_A0A3P9DPH0;A0A3P9DNZ8	-0.00892531	0.0384321	-0.0473574	0.781593	0.25815	0.291455
Transketolase_A0A3P9DPH7	0.0746912	0.150228	-0.0755365	0.463259	0.180847	0.559235
Heterogeneous nuclear ribonucleoprotein A1_A0A3P9DPN3	-0.0872154	-0.0756738	-0.0115416	0.161957	0.200266	0.717996
Serine peptidase inhibitor, Kunitz type 1_A0A3P9DPR1	-0.0120414	-0.0652584	0.053217	0.876892	0.200252	0.551502
Proliferation-associated protein 2G4_A0A3P9DPR3	0.0115995	0.0412839	-0.0296844	0.376383	0.101025	0.255493
Ectonucleotide pyrophosphatase/phosphodiesterase family member 2_A0A3P9DPS8;A0A3P9DN99	1.1306	1.10028	0.0303236	0.00314692	0.00058087	0.817032
Keratin, type I cytoskeletal 18_A0A3P9DMX0;A0A3P9DPT4	0.176541	0.129297	0.0472443	0.177803	0.307931	0.521816
Myosin light polypeptide 6_A0A3P9DQC6;A0A3P9DPU5;A0A3P9DQG3	0.172877	0.247061	-0.0741848	0.0800575	0.0122635	0.286649
Structural maintenance of chromosomes protein_A0A3P9DPU9	-0.0137338	0.00689893	-0.0206327	0.821509	0.858103	0.775045
Histone-binding protein RBBP4_A0A3P9BYR7;A0A3P9DPV1;A0A3P9B0L2	-0.0860856	-0.0373865	-0.0486991	0.0161941	0.179026	0.150044
Signal sequence receptor subunit delta_A0A3P9DPW5	0.119802	0.0480204	0.0717812	0.289658	0.52956	0.421418
Glucose-6-phosphate 1-dehydrogenase_A0A3P9DPX4;A0A3P9DQF9;A0A3P9DKM2	0.170191	0.297239	-0.127049	0.0585813	0.0453302	0.215297
Biglycan_A0A3P9DPZ6	0.722548	0.545494	0.177054	0.100344	0.243655	0.614996
Ubiquitin like modifier activating enzyme 1_A0A3P9CDI5;A0A3P9DQ14	-0.1278	-0.0440221	-0.0837778	0.0370771	0.468261	0.229573
Plakophilin 1_A0A3P9DQ31	-0.259345	-0.263606	0.00426042	0.0050369	0.0304786	0.963399
Cysteine and glycine-rich protein 2_A0A3P9DQ36	-0.129065	-0.0614534	-0.0676116	0.55213	0.766069	0.312095
Cell division cycle 5 like_A0A3P9DQ75;A0A3P9DPB4;A0A3P9DQQ8	0.0823827	0.107478	-0.025095	0.0517715	0.00608377	0.385601
NAD-dependent protein deacetylase_A0A3P9DQ76;A0A3P9DRN8	0.184139	0.275437	-0.0912977	0.177258	0.0251527	0.478551
Secretagogin_A0A3P9DQ78	0.248251	0.0877117	0.160539	0.0563701	0.374305	0.0299885
Complex I-B22_A0A3P9DQ87	-0.0756354	-0.0840461	0.00841074	0.0843554	0.0350211	0.840122
Coatomer subunit zeta_A0A3P9DQ92;A0A3P9DQJ9	-0.032854	0.00519001	-0.038044	0.781507	0.934739	0.764185
Catechol O-methyltransferase domain-containing protein 1-like_A0A3P9DSB6;A0A3P9DQI0	1.34308	1.23745	0.105633	0.066589	0.126331	0.83171
Carbonyl reductase [NADPH] 1_A0A3P9DQI8	-0.167692	0.0189722	-0.186664	0.376686	0.892559	0.155653
40S ribosomal protein S24_A0A3P9DQK1;A0A3P9DSD4;A0A3P9DS21	-0.110075	-0.162303	0.0522281	0.369145	0.203569	0.371999
Myoferlin_A0A3P9DQQ0	0.1116	-0.0291279	0.140727	0.383565	0.809015	0.2737
Metaxin 2_A0A3P9DQV2;A0A3P9DQT0	0.189377	0.195416	-0.00603938	0.0260517	0.102661	0.949623
UTP--glucose-1-phosphate uridylyltransferase_A0A3P9DQU9	0.269096	0.396218	-0.127122	0.033411	0.0063178	0.00953685
Uncharacterized LOC112431174_A0A3P9DSL1;A0A3P9DT11;A0A3P9DR46;A0A3P9CUT4	0.0870799	0.0283808	0.0586991	0.900275	0.968036	0.950474
Histidine triad nucleotide binding protein 1_A0A3P9DR59	-0.250913	-0.0747613	-0.176151	0.135355	0.569987	0.195934
Ribonucloprotein_A0A3P9DRF3	0.0288046	-0.00100864	0.0298133	0.694331	0.986748	0.519207
Adenylosuccinate synthetase_A0A3P9DRI7	-0.207038	-0.0649638	-0.142074	0.019931	0.217468	0.0127035
Complement factor I_A0A3P9DRN0	0.833025	0.810257	0.0227684	0.00442795	0.0070278	0.883239
Galectin_A0A3P9DRP7	-0.101452	-0.0243386	-0.0771137	0.271999	0.794732	0.287455
Protein transport protein SEC23_A0A3P9DRR3	0.148028	0.136248	0.0117799	0.231709	0.259999	0.858522
Angiotensin 1-10_A0A3P9DRT0	1.25964	1.15267	0.106971	0.0162739	0.00347542	0.643057
Proteasome subunit beta_A0A3P9DRT1;A0A3P9DSD3;A0A3P9DQW3	-0.133416	-0.0852081	-0.0482082	0.144759	0.35652	0.536398
3'-phosphoadenosine-5'-phosphosulfate synthase_A0A3P9DRT4	0.202826	0.19155	0.0112764	0.191164	0.201139	0.877008
Uncharacterized protein_A0A3P9DRU7	-0.0506941	-0.196145	0.145451	0.666652	0.156233	0.330518
Glutathione-dependent dehydroascorbate reductase_A0A3P9DRV5	0.565834	0.65577	-0.0899359	0.0169397	0.00265938	0.500366
Voltage-dependent anion-selective channel protein 2_A0A3P9DRW2	-0.0216552	0.0029211	-0.0245763	0.575387	0.940459	0.335967
Annexin_A0A3P9DRX9	-0.0731672	-0.0358836	-0.0372836	0.521733	0.660811	0.768739
Signal recognition particle 54 kDa protein_A0A3P9DS38	0.287069	0.218486	0.0685823	0.000498632	0.00377665	0.111298
Complement factor H-related protein 2-like_A0A3P9DS43	0.134	-0.0383195	0.17232	0.155316	0.783295	0.228904
Rho-related GTP-binding protein RhoG_A0A3P9DS81	0.290824	0.359561	-0.0687377	0.0110207	0.00472713	0.400856
Glutathione-dependent dehydroascorbate reductase_A0A3P9DS87	-0.760207	-0.304412	-0.455795	0.058028	0.273511	0.305539
2,3-bisphosphoglycerate 3-phosphatase_A0A3P9DS97	1.07904	0.964451	0.114588	0.0106772	0.0197571	0.610431
Sidoreflexin_A0A3P9DSA4	-0.013816	0.00483417	-0.0186502	0.793677	0.932348	0.478086
Inorganic diphosphatase_A0A3P9DSD8;A0A3P9DS26	-0.0567514	-0.0565451	-0.000206313	0.473278	0.494654	0.993958
PYD and CARD domain containing_A0A3P9DSK6;A0A3P9DSK0;A0A3P9DSZ5	-0.16257	-0.122348	-0.0402213	0.209879	0.350507	0.467706
Fibrinogen beta chain_A0A3P9DSU1	1.28685	0.969684	0.317168	0.0947423	0.0261462	0.486892
IST1 homolog_A0A3P9DSU3	-0.32858	-0.135949	-0.192631	0.0477687	0.294511	0.248267
Ferritin_A0A3P9DSU7;A0A3P9DTS0	0.206126	0.286521	-0.0803948	0.430573	0.124685	0.709355
Fibrinopeptide A_A0A3P9DSY1;A0A3P9DRG6	1.10412	0.910771	0.19335	0.0658174	0.0161965	0.578594
Retinal Mueller cells isomerohydrolase_A0A3P9DTI6;A0A3P9DT00	0.147754	0.0898887	0.0578651	0.123397	0.524874	0.67031
ATP-dependent DNA helicase 2 subunit 1_A0A3P9DT69	-0.158547	-0.0801566	-0.0783903	0.0850304	0.0721575	0.357451
Cytochrome c oxidase polypeptide Va_A0A3P9DU50;A0A3P9BBE3;A0A3P9BBE9;A0A3P9DTE3	-0.299073	-0.184912	-0.114161	0.014728	0.085895	0.171604
60S acidic ribosomal protein P2_A0A3P9DTF3	-0.0564929	-0.251359	0.194866	0.788023	0.112293	0.447261
Serrate RNA effector molecule homolog_A0A3P9DTG8	-0.0584423	0.00857184	-0.0670141	0.4507	0.652122	0.403257
Mitochondrial import inner membrane translocase subunit_A0A3P9DTL6	0.0768813	-0.0113903	0.0882715	0.567117	0.721761	0.516257
RNA-binding protein 4B_A0A3P9DV76;A0A3P9DTT6	-0.136021	-0.123873	-0.0121479	0.149671	0.117326	0.874588
Microsomal signal peptidase 25 kDa subunit_A0A3P9DUG8;A0A3P9DTU1	0.113109	0.111908	0.00120141	0.175046	0.0516798	0.986653
Complement factor H-related protein 2-like_A0A3P9DTL5;A0A3P9DTX8	0.834348	0.671646	0.162701	0.0404008	0.110819	0.575062
ATP-binding cassette sub-family E member 1_A0A3P9DUV0;A0A3P9BP43;A0A3P9DU15	0.05268	0.0382203	0.0144597	0.529271	0.404147	0.87177
Lysozyme_A0A3P9DUR7;A0A3P9DUS2	1.42734	1.2546	0.172735	0.00343112	0.0196419	0.457772
Uncharacterized protein_A0A3P9DUV7;A0A3P9DUW6	0.958113	0.606705	0.351408	0.000475908	0.271905	0.305167
Uncharacterized protein_A0A3P9D376;A0A3P9DUA7;A0A3P9DU70;A0A3P9DJG7;A0A3P9B4Y7;A0A3P9DTQ4;A0A3P9DHG0;A0A3P9D2H7;A0A3P9DUR1;A0A3P9D552;A0A3P9DKW5;A0A3P9DFX9;A0A3P9CJ81;A0A3P9DSR1;A0A3P9DGH3;A0A3P9C2P3;A0A3P9C6Z2;A0A3P9B680;A0A3P9DK03;A0A3P9DJ16;A0A3P9DV37;A0A3P9CZC7;A0A3P9D356;A0A3P9DHW4;A0A3P9DUY1;A0A3P9DGQ0;A0A3P9DUS6;A0A3P9DJJ4;A0A3P9B681;A0A3P9DK04;A0A3P9DTL7;A0A3P9DUL7;A0A3P9DJK0;A0A3P9DUY2;A…	-0.163371	-0.072966	-0.0904051	0.037229	0.294766	0.251495
Toll interacting protein_A0A3P9DUZ4	0.015292	0.028243	-0.012951	0.745313	0.338664	0.767176
Reticulon_A0A3P9DV51	0.086925	0.09273	-0.005805	0.590331	0.363489	0.967159
26S proteasome AAA-ATPase subunit RPT1_A0A3P9DV70;A0A3P9BK96	-0.05518	-0.0264775	-0.0287025	0.418581	0.524977	0.712872

## Sheet: Supplementary File 1d
Category	Term	Genes	Fold Enrichment	FDR	Enrichment Score	Annotation Cluster	label	Term Name
REACTOME_PATHWAY	R-HSA-418990~Adherens junctions interactions	ENSG00000103241, ENSG00000130202, ENSG00000198561, ENSG00000140937, ENSG00000162706, ENSG00000110400, ENSG00000130396, ENSG00000040731, ENSG00000113361, ENSG00000139880, ENSG00000090905, ENSG00000062038, ENSG00000135074, ENSG00000078687, ENSG00000100354	4.20851	0.00100011	3.64487	1	AdultHLip	Adherens junctions interactions
REACTOME_PATHWAY	R-HSA-421270~Cell-cell junction organization	ENSG00000103241, ENSG00000130202, ENSG00000198561, ENSG00000069188, ENSG00000140937, ENSG00000162706, ENSG00000110400, ENSG00000130396, ENSG00000040731, ENSG00000113361, ENSG00000139880, ENSG00000090905, ENSG00000062038, ENSG00000135074, ENSG00000078687, ENSG00000184113, ENSG00000100354	2.92141	0.0116925	3.64487	1	AdultHLip	Cell-cell junction organization
REACTOME_PATHWAY	R-HSA-446728~Cell junction organization	ENSG00000103241, ENSG00000130202, ENSG00000198561, ENSG00000069188, ENSG00000140937, ENSG00000162706, ENSG00000128591, ENSG00000110400, ENSG00000130396, ENSG00000040731, ENSG00000196924, ENSG00000113361, ENSG00000091409, ENSG00000139880, ENSG00000090905, ENSG00000062038, ENSG00000135074, ENSG00000078687, ENSG00000184113, ENSG00000100354	2.56968	0.0149057	3.64487	1	AdultHLip	Cell junction organization
REACTOME_PATHWAY	R-HSA-9759475~Regulation of CDH11 Expression and Function	ENSG00000139880, ENSG00000103241, ENSG00000198561, ENSG00000090905, ENSG00000140937, ENSG00000135074, ENSG00000078687, ENSG00000100354	4.9992	0.0288298	3.64487	1	AdultHLip	Regulation of CDH11 Expression and Function
REACTOME_PATHWAY	R-HSA-9759476~Regulation of Homotypic Cell-Cell Adhesion	ENSG00000139880, ENSG00000103241, ENSG00000198561, ENSG00000090905, ENSG00000140937, ENSG00000135074, ENSG00000078687, ENSG00000100354	4.78184	0.0335576	3.64487	1	AdultHLip	Regulation of Homotypic Cell-Cell Adhesion
REACTOME_PATHWAY	R-HSA-9764260~Regulation of Expression and Function of Type II Classical Cadherins	ENSG00000139880, ENSG00000103241, ENSG00000198561, ENSG00000090905, ENSG00000140937, ENSG00000135074, ENSG00000078687, ENSG00000100354	4.78184	0.0335576	3.64487	1	AdultHLip	Regulation of Expression and Function of Type II Classical Cadherins
REACTOME_PATHWAY	R-HSA-1474290~Collagen formation	ENSG00000149380, ENSG00000108821, ENSG00000130635, ENSG00000072682, ENSG00000206384, ENSG00000204262, ENSG00000124749, ENSG00000091409, ENSG00000142156, ENSG00000117385, ENSG00000149968, ENSG00000113083, ENSG00000100985, ENSG00000164692, ENSG00000163359, ENSG00000149257, ENSG00000185624, ENSG00000160963, ENSG00000122884, ENSG00000187955	3.05507	0.00215302	3.28412	2	AdultHLip	Collagen formation
REACTOME_PATHWAY	R-HSA-1650814~Collagen biosynthesis and modifying enzymes	ENSG00000149380, ENSG00000108821, ENSG00000130635, ENSG00000072682, ENSG00000206384, ENSG00000204262, ENSG00000124749, ENSG00000142156, ENSG00000117385, ENSG00000164692, ENSG00000163359, ENSG00000149257, ENSG00000185624, ENSG00000160963, ENSG00000122884, ENSG00000187955	3.28306	0.00590666	3.28412	2	AdultHLip	Collagen biosynthesis and modifying enzymes
REACTOME_PATHWAY	R-HSA-1442490~Collagen degradation	ENSG00000108821, ENSG00000130635, ENSG00000206384, ENSG00000204262, ENSG00000157227, ENSG00000142156, ENSG00000149968, ENSG00000100985, ENSG00000164692, ENSG00000163359, ENSG00000102996, ENSG00000160963, ENSG00000143387, ENSG00000187955, ENSG00000140564	3.22214	0.011478	3.28412	2	AdultHLip	Collagen degradation
REACTOME_PATHWAY	R-HSA-8948216~Collagen chain trimerization	ENSG00000124749, ENSG00000142156, ENSG00000108821, ENSG00000130635, ENSG00000164692, ENSG00000163359, ENSG00000206384, ENSG00000160963, ENSG00000204262, ENSG00000187955	3.1245	0.0910906	3.28412	2	AdultHLip	Collagen chain trimerization
REACTOME_PATHWAY	R-HSA-2022090~Assembly of collagen fibrils and other multimeric structures	ENSG00000091409, ENSG00000142156, ENSG00000149968, ENSG00000108821, ENSG00000130635, ENSG00000100985, ENSG00000113083, ENSG00000164692, ENSG00000163359, ENSG00000206384, ENSG00000204262, ENSG00000187955	2.70449	0.0928264	3.28412	2	AdultHLip	Assembly of collagen fibrils and other multimeric structures
KEGG_PATHWAY	hsa04974:Protein digestion and absorption	ENSG00000137509, ENSG00000153002, ENSG00000108821, ENSG00000130635, ENSG00000206384, ENSG00000197635, ENSG00000021488, ENSG00000204262, ENSG00000124749, ENSG00000142156, ENSG00000164692, ENSG00000163359, ENSG00000122121, ENSG00000160963, ENSG00000187955, ENSG00000091704	2.1843	0.0826751	3.28412	2	AdultHLip	Protein digestion and absorption
REACTOME_PATHWAY	R-HSA-9824443~Parasitic Infection Pathways	ENSG00000096433, ENSG00000141968, ENSG00000114302, ENSG00000176533, ENSG00000132970, ENSG00000136754, ENSG00000165025, ENSG00000100448, ENSG00000100345, ENSG00000101336, ENSG00000140368, ENSG00000145555, ENSG00000140564, ENSG00000128266, ENSG00000135318, ENSG00000107404, ENSG00000099998, ENSG00000155849, ENSG00000069966, ENSG00000138443, ENSG00000114353, ENSG00000114251, ENSG00000055163, ENSG0000…	2.17953	0.0174224	2.61136	3	AdultHLip	Parasitic Infection Pathways
REACTOME_PATHWAY	R-HSA-9658195~Leishmania infection	ENSG00000096433, ENSG00000141968, ENSG00000114302, ENSG00000176533, ENSG00000132970, ENSG00000136754, ENSG00000165025, ENSG00000100448, ENSG00000100345, ENSG00000101336, ENSG00000140368, ENSG00000145555, ENSG00000140564, ENSG00000128266, ENSG00000135318, ENSG00000107404, ENSG00000099998, ENSG00000155849, ENSG00000069966, ENSG00000138443, ENSG00000114353, ENSG00000114251, ENSG00000055163, ENSG0000…	2.17953	0.0174224	2.61136	3	AdultHLip	Leishmania infection
REACTOME_PATHWAY	R-HSA-2029480~Fcgamma receptor (FCGR) dependent phagocytosis	ENSG00000096433, ENSG00000105647, ENSG00000141968, ENSG00000155849, ENSG00000171132, ENSG00000138443, ENSG00000132970, ENSG00000136754, ENSG00000080824, ENSG00000165025, ENSG00000055163, ENSG00000123338, ENSG00000101336, ENSG00000100345, ENSG00000149269, ENSG00000010810, ENSG00000145555	2.71759	0.0208722	2.61136	3	AdultHLip	Fcgamma receptor (FCGR) dependent phagocytosis
REACTOME_PATHWAY	R-HSA-9664407~Parasite infection	ENSG00000165025, ENSG00000055163, ENSG00000123338, ENSG00000141968, ENSG00000100345, ENSG00000155849, ENSG00000101336, ENSG00000010810, ENSG00000138443, ENSG00000132970, ENSG00000136754, ENSG00000145555	2.79616	0.0783937	2.61136	3	AdultHLip	Parasite infection
REACTOME_PATHWAY	R-HSA-9664417~Leishmania phagocytosis	ENSG00000165025, ENSG00000055163, ENSG00000123338, ENSG00000141968, ENSG00000100345, ENSG00000155849, ENSG00000101336, ENSG00000010810, ENSG00000138443, ENSG00000132970, ENSG00000136754, ENSG00000145555	2.79616	0.0783937	2.61136	3	AdultHLip	Leishmania phagocytosis
REACTOME_PATHWAY	R-HSA-9664422~FCGR3A-mediated phagocytosis	ENSG00000165025, ENSG00000055163, ENSG00000123338, ENSG00000141968, ENSG00000100345, ENSG00000155849, ENSG00000101336, ENSG00000010810, ENSG00000138443, ENSG00000132970, ENSG00000136754, ENSG00000145555	2.79616	0.0783937	2.61136	3	AdultHLip	FCGR3A-mediated phagocytosis
REACTOME_PATHWAY	R-HSA-2029482~Regulation of actin dynamics for phagocytic cup formation	ENSG00000165025, ENSG00000055163, ENSG00000123338, ENSG00000141968, ENSG00000100345, ENSG00000155849, ENSG00000149269, ENSG00000138443, ENSG00000132970, ENSG00000136754, ENSG00000080824, ENSG00000145555	2.70449	0.0928264	2.61136	3	AdultHLip	Regulation of actin dynamics for phagocytic cup formation
REACTOME_PATHWAY	R-HSA-5663213~RHO GTPases Activate WASPs and WAVEs	ENSG00000055163, ENSG00000123338, ENSG00000138443, ENSG00000132970, ENSG00000136754	1.90942	0.96	2.61136	3	AdultHLip	RHO GTPases Activate WASPs and WAVEs
REACTOME_PATHWAY	R-HSA-399956~CRMPs in Sema3A signaling	ENSG00000113657, ENSG00000076356, ENSG00000092964, ENSG00000221866, ENSG00000130827, ENSG00000010810, ENSG00000114554, ENSG00000151640	6.8739	0.00590666	2.45551	4	AdultHLip	CRMPs in Sema3A signaling
GOTERM_BP_DIRECT	GO:0050772~positive regulation of axonogenesis	ENSG00000136040, ENSG00000169855, ENSG00000076356, ENSG00000004399, ENSG00000221866, ENSG00000130827, ENSG00000171533, ENSG00000145147, ENSG00000114554	4.6466	0.0800414	2.45551	4	AdultHLip	positive regulation of axonogenesis
REACTOME_PATHWAY	R-HSA-399954~Sema3A PAK dependent Axon repulsion	ENSG00000076356, ENSG00000149269, ENSG00000221866, ENSG00000130827, ENSG00000010810, ENSG00000114554, ENSG00000080824	6.01466	0.028495	2.45551	4	AdultHLip	Sema3A PAK dependent Axon repulsion
GOTERM_BP_DIRECT	GO:1902287~semaphorin-plexin signaling pathway involved in axon guidance	ENSG00000136040, ENSG00000076356, ENSG00000004399, ENSG00000221866, ENSG00000130827, ENSG00000114554	6.40198	0.16278	2.45551	4	AdultHLip	semaphorin-plexin signaling pathway involved in axon guidance
GOTERM_BP_DIRECT	GO:0043087~regulation of GTPase activity	ENSG00000141968, ENSG00000076356, ENSG00000004399, ENSG00000044524, ENSG00000116106, ENSG00000114554, ENSG00000136040, ENSG00000157680, ENSG00000221866, ENSG00000102302, ENSG00000130827, ENSG00000106069, ENSG00000105122, ENSG00000184349	2.4623	0.261227	2.45551	4	AdultHLip	regulation of GTPase activity
REACTOME_PATHWAY	R-HSA-416700~Other semaphorin interactions	ENSG00000136040, ENSG00000076356, ENSG00000138623, ENSG00000004399, ENSG00000221866, ENSG00000114554	4.34141	0.179696	2.45551	4	AdultHLip	Other semaphorin interactions
REACTOME_PATHWAY	R-HSA-399955~SEMA3A-Plexin repulsion signaling by inhibiting Integrin adhesion	ENSG00000076356, ENSG00000221866, ENSG00000130827, ENSG00000010810, ENSG00000114554	4.90993	0.252583	2.45551	4	AdultHLip	SEMA3A-Plexin repulsion signaling by inhibiting Integrin adhesion
GOTERM_BP_DIRECT	GO:0007162~negative regulation of cell adhesion	ENSG00000136040, ENSG00000133216, ENSG00000076356, ENSG00000004399, ENSG00000221866, ENSG00000130827, ENSG00000116106, ENSG00000114554	2.51058	0.861652	2.45551	4	AdultHLip	negative regulation of cell adhesion
GOTERM_BP_DIRECT	GO:0030334~regulation of cell migration	ENSG00000136040, ENSG00000196924, ENSG00000143878, ENSG00000135905, ENSG00000113657, ENSG00000076356, ENSG00000004399, ENSG00000221866, ENSG00000130827, ENSG00000127603, ENSG00000041982, ENSG00000114554	1.68473	0.992276	2.45551	4	AdultHLip	regulation of cell migration
REACTOME_PATHWAY	R-HSA-9759475~Regulation of CDH11 Expression and Function	ENSG00000139880, ENSG00000103241, ENSG00000198561, ENSG00000090905, ENSG00000140937, ENSG00000135074, ENSG00000078687, ENSG00000100354	4.9992	0.0288298	2.36454	5	AdultHLip	Regulation of CDH11 Expression and Function
REACTOME_PATHWAY	R-HSA-9759476~Regulation of Homotypic Cell-Cell Adhesion	ENSG00000139880, ENSG00000103241, ENSG00000198561, ENSG00000090905, ENSG00000140937, ENSG00000135074, ENSG00000078687, ENSG00000100354	4.78184	0.0335576	2.36454	5	AdultHLip	Regulation of Homotypic Cell-Cell Adhesion
REACTOME_PATHWAY	R-HSA-9764260~Regulation of Expression and Function of Type II Classical Cadherins	ENSG00000139880, ENSG00000103241, ENSG00000198561, ENSG00000090905, ENSG00000140937, ENSG00000135074, ENSG00000078687, ENSG00000100354	4.78184	0.0335576	2.36454	5	AdultHLip	Regulation of Expression and Function of Type II Classical Cadherins
REACTOME_PATHWAY	R-HSA-9762292~Regulation of CDH11 function	ENSG00000139880, ENSG00000198561, ENSG00000140937, ENSG00000135074	5.49912	0.393469	2.36454	5	AdultHLip	Regulation of CDH11 function
REACTOME_PATHWAY	R-HSA-9833576~CDH11 homotypic and heterotypic interactions	ENSG00000139880, ENSG00000198561, ENSG00000140937	5.89192	0.766376	2.36454	5	AdultHLip	CDH11 homotypic and heterotypic interactions
GOTERM_BP_DIRECT	GO:0048013~ephrin receptor signaling pathway	ENSG00000133216, ENSG00000099617, ENSG00000102606, ENSG00000100985, ENSG00000149269, ENSG00000160145, ENSG00000044524, ENSG00000090776, ENSG00000179295, ENSG00000116106, ENSG00000010810, ENSG00000184349	3.76587	0.0521961	2.31819	6	AdultHLip	ephrin receptor signaling pathway
REACTOME_PATHWAY	R-HSA-2682334~EPH-Ephrin signaling	ENSG00000133216, ENSG00000176884, ENSG00000099617, ENSG00000196961, ENSG00000044524, ENSG00000116106, ENSG00000133026, ENSG00000102606, ENSG00000100985, ENSG00000100345, ENSG00000149269, ENSG00000160145, ENSG00000101335, ENSG00000182541, ENSG00000090776, ENSG00000010810, ENSG00000184349	2.54036	0.0335576	2.31819	6	AdultHLip	EPH-Ephrin signaling
REACTOME_PATHWAY	R-HSA-3928663~EPHA-mediated growth cone collapse	ENSG00000099617, ENSG00000100345, ENSG00000044524, ENSG00000101335, ENSG00000116106, ENSG00000133026, ENSG00000010810, ENSG00000184349	3.66608	0.10084	2.31819	6	AdultHLip	EPHA-mediated growth cone collapse
REACTOME_PATHWAY	R-HSA-3928665~EPH-ephrin mediated repulsion of cells	ENSG00000133216, ENSG00000099617, ENSG00000100985, ENSG00000196961, ENSG00000044524, ENSG00000090776, ENSG00000116106, ENSG00000010810, ENSG00000184349	2.42608	0.390033	2.31819	6	AdultHLip	EPH-ephrin mediated repulsion of cells
REACTOME_PATHWAY	R-HSA-3928662~EPHB-mediated forward signaling	ENSG00000133216, ENSG00000176884, ENSG00000149269, ENSG00000160145, ENSG00000182541, ENSG00000090776, ENSG00000010810	2.2913	0.752952	2.31819	6	AdultHLip	EPHB-mediated forward signaling
REACTOME_PATHWAY	R-HSA-3000178~ECM proteoglycans	ENSG00000108821, ENSG00000130635, ENSG00000105426, ENSG00000091136, ENSG00000139329, ENSG00000041982, ENSG00000115414, ENSG00000206384, ENSG00000106819, ENSG00000204262, ENSG00000038427, ENSG00000142156, ENSG00000164692, ENSG00000163359, ENSG00000140678	2.71338	0.0356618	2.07136	7	AdultHLip	ECM proteoglycans
REACTOME_PATHWAY	R-HSA-6806834~Signaling by MET	ENSG00000108821, ENSG00000147010, ENSG00000130635, ENSG00000091136, ENSG00000019991, ENSG00000115414, ENSG00000136205, ENSG00000110395, ENSG00000204262, ENSG00000005884, ENSG00000164692, ENSG00000140600, ENSG00000107263, ENSG00000179295, ENSG00000141985	2.61034	0.0467836	2.07136	7	AdultHLip	Signaling by MET
REACTOME_PATHWAY	R-HSA-8875878~MET promotes cell motility	ENSG00000108821, ENSG00000130635, ENSG00000091136, ENSG00000019991, ENSG00000164692, ENSG00000107263, ENSG00000115414, ENSG00000136205, ENSG00000204262, ENSG00000005884	3.35312	0.0631573	2.07136	7	AdultHLip	MET promotes cell motility
REACTOME_PATHWAY	R-HSA-8874081~MET activates PTK2 signaling	ENSG00000108821, ENSG00000130635, ENSG00000091136, ENSG00000019991, ENSG00000164692, ENSG00000115414, ENSG00000204262, ENSG00000005884	3.66608	0.10084	2.07136	7	AdultHLip	MET activates PTK2 signaling
REACTOME_PATHWAY	R-HSA-3000170~Syndecan interactions	ENSG00000091409, ENSG00000108821, ENSG00000130635, ENSG00000164692, ENSG00000041982, ENSG00000115414, ENSG00000204262	3.56425	0.202879	2.07136	7	AdultHLip	Syndecan interactions
REACTOME_PATHWAY	R-HSA-3000171~Non-integrin membrane-ECM interactions	ENSG00000091409, ENSG00000108821, ENSG00000130635, ENSG00000091136, ENSG00000164692, ENSG00000100311, ENSG00000041982, ENSG00000115414, ENSG00000204262	2.09712	0.643448	2.07136	7	AdultHLip	Non-integrin membrane-ECM interactions
GOTERM_BP_DIRECT	GO:0043588~skin development	ENSG00000108821, ENSG00000140937, ENSG00000130635, ENSG00000204262, ENSG00000005884	1.90535	0.992276	2.07136	7	AdultHLip	skin development
REACTOME_PATHWAY	R-HSA-5173105~O-linked glycosylation	ENSG00000257594, ENSG00000165905, ENSG00000163638, ENSG00000198488, ENSG00000141429, ENSG00000136378, ENSG00000159674, ENSG00000151388, ENSG00000179913, ENSG00000008513, ENSG00000145536, ENSG00000186340, ENSG00000009830, ENSG00000119514, ENSG00000144229, ENSG00000166106, ENSG00000164764, ENSG00000185900	2.22937	0.0693969	1.99574	8	AdultHLip	O-linked glycosylation
REACTOME_PATHWAY	R-HSA-3906995~Diseases associated with O-glycosylation of proteins	ENSG00000163638, ENSG00000136378, ENSG00000159674, ENSG00000151388, ENSG00000145536, ENSG00000186340, ENSG00000009830, ENSG00000119514, ENSG00000144229, ENSG00000204301, ENSG00000148400, ENSG00000166106, ENSG00000164764	2.62826	0.082091	1.99574	8	AdultHLip	Diseases associated with O-glycosylation of proteins
REACTOME_PATHWAY	R-HSA-5083635~Defective B3GALTL causes PpS	ENSG00000145536, ENSG00000186340, ENSG00000144229, ENSG00000163638, ENSG00000159674, ENSG00000136378, ENSG00000151388, ENSG00000166106, ENSG00000164764	3.34406	0.0967102	1.99574	8	AdultHLip	Defective B3GALTL causes PpS
REACTOME_PATHWAY	R-HSA-5173214~O-glycosylation of TSR domain-containing proteins	ENSG00000145536, ENSG00000186340, ENSG00000144229, ENSG00000163638, ENSG00000159674, ENSG00000136378, ENSG00000151388, ENSG00000166106, ENSG00000164764	3.25606	0.106667	1.99574	8	AdultHLip	O-glycosylation of TSR domain-containing proteins
REACTOME_PATHWAY	R-HSA-3781865~Diseases of glycosylation	ENSG00000163638, ENSG00000179399, ENSG00000136378, ENSG00000159674, ENSG00000114646, ENSG00000139329, ENSG00000151388, ENSG00000145536, ENSG00000139330, ENSG00000038427, ENSG00000186340, ENSG00000009830, ENSG00000119514, ENSG00000144229, ENSG00000204301, ENSG00000148400, ENSG00000166106, ENSG00000086062, ENSG00000164764	1.82663	0.252583	1.99574	8	AdultHLip	Diseases of glycosylation
REACTOME_PATHWAY	R-HSA-5668914~Diseases of metabolism	ENSG00000241635, ENSG00000163638, ENSG00000179399, ENSG00000136378, ENSG00000159674, ENSG00000114646, ENSG00000115138, ENSG00000139329, ENSG00000151388, ENSG00000145536, ENSG00000139330, ENSG00000038427, ENSG00000186340, ENSG00000009830, ENSG00000119514, ENSG00000144229, ENSG00000204301, ENSG00000148400, ENSG00000166106, ENSG00000086062, ENSG00000164764	1.15945	0.96	1.99574	8	AdultHLip	Diseases of metabolism
KEGG_PATHWAY	hsa05225:Hepatocellular carcinoma	ENSG00000152284, ENSG00000019991, ENSG00000125084, ENSG00000111432, ENSG00000080503, ENSG00000117713, ENSG00000138795, ENSG00000136997, ENSG00000188064, ENSG00000169884, ENSG00000099956, ENSG00000107404, ENSG00000126583, ENSG00000073584, ENSG00000105647, ENSG00000139613, ENSG00000065621, ENSG00000114251, ENSG00000081059, ENSG00000117020, ENSG00000171608, ENSG00000079999, ENSG00000166501, ENSG0000…	2.09248	0.018542	1.90626	9	AdultHLip	Hepatocellular carcinoma
KEGG_PATHWAY	hsa04310:Wnt signaling pathway	ENSG00000152284, ENSG00000125084, ENSG00000111432, ENSG00000213923, ENSG00000138795, ENSG00000136997, ENSG00000188064, ENSG00000169884, ENSG00000116161, ENSG00000146122, ENSG00000182621, ENSG00000140807, ENSG00000107404, ENSG00000126583, ENSG00000162738, ENSG00000154856, ENSG00000173218, ENSG00000101849, ENSG00000114251, ENSG00000081059, ENSG00000185483, ENSG00000139174, ENSG00000163637, ENSG0000…	2.05577	0.0220863	1.90626	9	AdultHLip	Wnt signaling pathway
KEGG_PATHWAY	hsa04916:Melanogenesis	ENSG00000157613, ENSG00000107404, ENSG00000126583, ENSG00000152284, ENSG00000125084, ENSG00000111432, ENSG00000115138, ENSG00000138795, ENSG00000114353, ENSG00000258839, ENSG00000188064, ENSG00000114251, ENSG00000081059, ENSG00000169884, ENSG00000182621, ENSG00000166501	2.22756	0.0747184	1.90626	9	AdultHLip	Melanogenesis
KEGG_PATHWAY	hsa05224:Breast cancer	ENSG00000107404, ENSG00000135547, ENSG00000152284, ENSG00000105647, ENSG00000125084, ENSG00000111432, ENSG00000138795, ENSG00000136997, ENSG00000037280, ENSG00000084676, ENSG00000188064, ENSG00000198719, ENSG00000114251, ENSG00000081059, ENSG00000204301, ENSG00000169884, ENSG00000117020, ENSG00000171608, ENSG00000148400, ENSG00000168646	1.91312	0.0926063	1.90626	9	AdultHLip	Breast cancer
KEGG_PATHWAY	hsa05217:Basal cell carcinoma	ENSG00000188064, ENSG00000107404, ENSG00000114251, ENSG00000081059, ENSG00000169884, ENSG00000152284, ENSG00000125084, ENSG00000111432, ENSG00000106571, ENSG00000138795, ENSG00000168646	2.45518	0.129082	1.90626	9	AdultHLip	Basal cell carcinoma
GOTERM_BP_DIRECT	GO:0060070~canonical Wnt signaling pathway	ENSG00000107404, ENSG00000162946, ENSG00000152284, ENSG00000125084, ENSG00000111432, ENSG00000213923, ENSG00000138795, ENSG00000150907, ENSG00000188064, ENSG00000114251, ENSG00000081059, ENSG00000169884, ENSG00000197380	2.03985	0.721471	1.90626	9	AdultHLip	canonical Wnt signaling pathway
KEGG_PATHWAY	hsa04934:Cushing syndrome	ENSG00000157613, ENSG00000096433, ENSG00000151067, ENSG00000107404, ENSG00000152284, ENSG00000125084, ENSG00000111432, ENSG00000115138, ENSG00000138795, ENSG00000118058, ENSG00000114353, ENSG00000188064, ENSG00000114251, ENSG00000081059, ENSG00000169884, ENSG00000182621, ENSG00000168646	1.54222	0.434307	1.90626	9	AdultHLip	Cushing syndrome
KEGG_PATHWAY	hsa04390:Hippo signaling pathway	ENSG00000140807, ENSG00000107404, ENSG00000152284, ENSG00000125084, ENSG00000111432, ENSG00000213923, ENSG00000138795, ENSG00000136997, ENSG00000150672, ENSG00000188064, ENSG00000114251, ENSG00000081059, ENSG00000169884, ENSG00000151208, ENSG00000183682, ENSG00000160255, ENSG00000168646	1.52258	0.434314	1.90626	9	AdultHLip	Hippo signaling pathway
KEGG_PATHWAY	hsa05226:Gastric cancer	ENSG00000107404, ENSG00000152284, ENSG00000105647, ENSG00000019991, ENSG00000125084, ENSG00000111432, ENSG00000066468, ENSG00000138795, ENSG00000136997, ENSG00000188064, ENSG00000114251, ENSG00000081059, ENSG00000169884, ENSG00000117020, ENSG00000171608, ENSG00000168646	1.50996	0.468701	1.90626	9	AdultHLip	Gastric cancer
GOTERM_BP_DIRECT	GO:0007043~cell-cell junction assembly	ENSG00000113361, ENSG00000139880, ENSG00000173706, ENSG00000198561, ENSG00000062038, ENSG00000140937, ENSG00000171914, ENSG00000184113, ENSG00000075618, ENSG00000040731	3.47934	0.173302	1.78916	10	AdultHLip	cell-cell junction assembly
GOTERM_BP_DIRECT	GO:0098742~cell-cell adhesion via plasma-membrane adhesion molecules	ENSG00000150471, ENSG00000113361, ENSG00000139880, ENSG00000062038, ENSG00000140937, ENSG00000125848, ENSG00000160255, ENSG00000261371, ENSG00000040731	3.79065	0.180627	1.78916	10	AdultHLip	cell-cell adhesion via plasma-membrane adhesion molecules
GOTERM_BP_DIRECT	GO:0044331~cell-cell adhesion mediated by cadherin	ENSG00000113361, ENSG00000139880, ENSG00000198561, ENSG00000062038, ENSG00000140937, ENSG00000130396, ENSG00000040731	4.00124	0.360848	1.78916	10	AdultHLip	cell-cell adhesion mediated by cadherin
GOTERM_BP_DIRECT	GO:0034332~adherens junction organization	ENSG00000113361, ENSG00000139880, ENSG00000062038, ENSG00000140937, ENSG00000116106, ENSG00000040731	2.8244	0.992276	1.78916	10	AdultHLip	adherens junction organization
GOTERM_BP_DIRECT	GO:0000902~cell morphogenesis	ENSG00000113361, ENSG00000139880, ENSG00000055163, ENSG00000120885, ENSG00000062038, ENSG00000140937, ENSG00000151490, ENSG00000123338, ENSG00000019991, ENSG00000151651, ENSG00000040731	1.87292	0.992276	1.78916	10	AdultHLip	cell morphogenesis
GOTERM_BP_DIRECT	GO:0016339~calcium-dependent cell-cell adhesion via plasma membrane cell adhesion molecules	ENSG00000113361, ENSG00000139880, ENSG00000062038, ENSG00000140937, ENSG00000113555, ENSG00000040731	2.00062	0.992276	1.78916	10	AdultHLip	calcium-dependent cell-cell adhesion via plasma membrane cell adhesion molecules
GOTERM_BP_DIRECT	GO:0097503~sialylation	ENSG00000117069, ENSG00000111728, ENSG00000115525, ENSG00000125975, ENSG00000144057, ENSG00000070526, ENSG00000008513	5.89656	0.101347	1.66041	11	AdultHLip	sialylation
REACTOME_PATHWAY	R-HSA-4085001~Sialic acid metabolism	ENSG00000117069, ENSG00000111728, ENSG00000135838, ENSG00000115525, ENSG00000095380, ENSG00000204099, ENSG00000144057, ENSG00000070526, ENSG00000008513	3.7494	0.0573655	1.66041	11	AdultHLip	Sialic acid metabolism
REACTOME_PATHWAY	R-HSA-446219~Synthesis of substrates in N-glycan biosythesis	ENSG00000117069, ENSG00000111728, ENSG00000173540, ENSG00000135838, ENSG00000115525, ENSG00000095380, ENSG00000204099, ENSG00000144057, ENSG00000070526, ENSG00000008513	2.18219	0.455095	1.66041	11	AdultHLip	Synthesis of substrates in N-glycan biosythesis
KEGG_PATHWAY	hsa00604:Glycosphingolipid biosynthesis - ganglio series	ENSG00000117069, ENSG00000111728, ENSG00000115525, ENSG00000008513	3.74972	0.434307	1.66041	11	AdultHLip	Glycosphingolipid biosynthesis - ganglio series
REACTOME_PATHWAY	R-HSA-446193~Biosynthesis of the N-glycan precursor (dolichol lipid-linked oligosaccharide, LLO) and transfer to a nascent protein	ENSG00000117069, ENSG00000111728, ENSG00000173540, ENSG00000135838, ENSG00000115525, ENSG00000095380, ENSG00000204099, ENSG00000144057, ENSG00000070526, ENSG00000008513	1.76254	0.848953	1.66041	11	AdultHLip	Biosynthesis of the N-glycan precursor (dolichol lipid-linked oligosaccharide, LLO) and transfer to a nascent protein
GOTERM_BP_DIRECT	GO:0006688~glycosphingolipid biosynthetic process	ENSG00000117069, ENSG00000111728, ENSG00000115525	3.69345	0.992276	1.66041	11	AdultHLip	glycosphingolipid biosynthetic process
GOTERM_BP_DIRECT	GO:0048010~vascular endothelial growth factor receptor signaling pathway	ENSG00000141968, ENSG00000128052, ENSG00000173511, ENSG00000010810, ENSG00000037280, ENSG00000167601, ENSG00000150630	3.73449	0.426889	1.59368	12	AdultHLip	vascular endothelial growth factor receptor signaling pathway
REACTOME_PATHWAY	R-HSA-194313~VEGF ligand-receptor interactions	ENSG00000128052, ENSG00000173511, ENSG00000037280, ENSG00000150630	6.8739	0.253883	1.59368	12	AdultHLip	VEGF ligand-receptor interactions
REACTOME_PATHWAY	R-HSA-195399~VEGF binds to VEGFR leading to receptor dimerization	ENSG00000128052, ENSG00000173511, ENSG00000037280, ENSG00000150630	6.8739	0.253883	1.59368	12	AdultHLip	VEGF binds to VEGFR leading to receptor dimerization
GOTERM_BP_DIRECT	GO:0002040~sprouting angiogenesis	ENSG00000148400, ENSG00000173511, ENSG00000165633, ENSG00000138795, ENSG00000037280, ENSG00000150630	2.8244	0.992276	1.59368	12	AdultHLip	sprouting angiogenesis
GOTERM_BP_DIRECT	GO:0038084~vascular endothelial growth factor signaling pathway	ENSG00000128052, ENSG00000173511, ENSG00000037280, ENSG00000150630	4.00124	0.992276	1.59368	12	AdultHLip	vascular endothelial growth factor signaling pathway
REACTOME_PATHWAY	R-HSA-912631~Regulation of signaling by CBL	ENSG00000165025, ENSG00000105647, ENSG00000141968, ENSG00000171608, ENSG00000101336, ENSG00000107263, ENSG00000010810, ENSG00000110395	4.9992	0.0288298	1.34679	13	AdultHLip	Regulation of signaling by CBL
GOTERM_BP_DIRECT	GO:0038096~Fc-gamma receptor signaling pathway involved in phagocytosis	ENSG00000165025, ENSG00000141968, ENSG00000101336, ENSG00000149269, ENSG00000171132, ENSG00000010810	4.57284	0.395643	1.34679	13	AdultHLip	Fc-gamma receptor signaling pathway involved in phagocytosis
REACTOME_PATHWAY	R-HSA-9706374~FLT3 signaling through SRC family kinases	ENSG00000165025, ENSG00000101336, ENSG00000010810	6.8739	0.649875	1.34679	13	AdultHLip	FLT3 signaling through SRC family kinases
REACTOME_PATHWAY	R-HSA-2029481~FCGR activation	ENSG00000165025, ENSG00000101336, ENSG00000010810	3.43695	0.96	1.34679	13	AdultHLip	FCGR activation
GOTERM_BP_DIRECT	GO:0002862~negative regulation of inflammatory response to antigenic stimulus	ENSG00000165025, ENSG00000101336, ENSG00000010810, ENSG00000140564	2.00062	0.992276	1.34679	13	AdultHLip	negative regulation of inflammatory response to antigenic stimulus
REACTOME_PATHWAY	R-HSA-9664323~FCGR3A-mediated IL10 synthesis	ENSG00000096433, ENSG00000165025, ENSG00000101336, ENSG00000114302, ENSG00000010810	1.71848	0.96	1.34679	13	AdultHLip	FCGR3A-mediated IL10 synthesis
REACTOME_PATHWAY	R-HSA-5627117~RHO GTPases Activate ROCKs	ENSG00000143878, ENSG00000100345, ENSG00000149269, ENSG00000101335, ENSG00000182541, ENSG00000133026	4.12434	0.217309	1.21616	14	AdultHLip	RHO GTPases Activate ROCKs
REACTOME_PATHWAY	R-HSA-416572~Sema4D induced cell migration and growth-cone collapse	ENSG00000196914, ENSG00000143878, ENSG00000100345, ENSG00000101335, ENSG00000182541, ENSG00000133026	3.92794	0.252583	1.21616	14	AdultHLip	Sema4D induced cell migration and growth-cone collapse
REACTOME_PATHWAY	R-HSA-400685~Sema4D in semaphorin signaling	ENSG00000196914, ENSG00000143878, ENSG00000100345, ENSG00000101335, ENSG00000182541, ENSG00000133026	3.29947	0.393469	1.21616	14	AdultHLip	Sema4D in semaphorin signaling
REACTOME_PATHWAY	R-HSA-5627123~RHO GTPases activate PAKs	ENSG00000196924, ENSG00000100345, ENSG00000149269, ENSG00000101335, ENSG00000133026	2.86413	0.78477	1.21616	14	AdultHLip	RHO GTPases activate PAKs
REACTOME_PATHWAY	R-HSA-5625900~RHO GTPases activate CIT	ENSG00000143878, ENSG00000100345, ENSG00000101335, ENSG00000133026	2.74956	0.96	1.21616	14	AdultHLip	RHO GTPases activate CIT
REACTOME_PATHWAY	R-HSA-5625740~RHO GTPases activate PKNs	ENSG00000143878, ENSG00000100345, ENSG00000149269, ENSG00000101335, ENSG00000107077, ENSG00000133026, ENSG00000123143, ENSG00000169083	1.17003	0.96	1.21616	14	AdultHLip	RHO GTPases activate PKNs
REACTOME_PATHWAY	R-HSA-2219528~PI3K/AKT Signaling in Cancer	ENSG00000105647, ENSG00000019991, ENSG00000141968, ENSG00000155629, ENSG00000113721, ENSG00000066468, ENSG00000204673, ENSG00000150907, ENSG00000117020, ENSG00000171608, ENSG00000100311, ENSG00000132906, ENSG00000179295, ENSG00000010810, ENSG00000163235, ENSG00000033327	2.11505	0.158904	1.18659	15	AdultHLip	PI3K/AKT Signaling in Cancer
REACTOME_PATHWAY	R-HSA-2219530~Constitutive Signaling by Aberrant PI3K in Cancer	ENSG00000105647, ENSG00000141968, ENSG00000019991, ENSG00000171608, ENSG00000155629, ENSG00000066468, ENSG00000113721, ENSG00000100311, ENSG00000179295, ENSG00000010810, ENSG00000163235, ENSG00000033327	2.11505	0.352889	1.18659	15	AdultHLip	Constitutive Signaling by Aberrant PI3K in Cancer
REACTOME_PATHWAY	R-HSA-199418~Negative regulation of the PI3K/AKT network	ENSG00000105647, ENSG00000019991, ENSG00000141968, ENSG00000155629, ENSG00000113721, ENSG00000066468, ENSG00000117020, ENSG00000171608, ENSG00000100311, ENSG00000179295, ENSG00000010810, ENSG00000163235, ENSG00000033327	1.58161	0.89595	1.18659	15	AdultHLip	Negative regulation of the PI3K/AKT network
REACTOME_PATHWAY	R-HSA-9006925~Intracellular signaling by second messengers	ENSG00000096433, ENSG00000019991, ENSG00000141968, ENSG00000066468, ENSG00000114302, ENSG00000204673, ENSG00000025039, ENSG00000090905, ENSG00000143614, ENSG00000141570, ENSG00000132906, ENSG00000033327, ENSG00000179632, ENSG00000126583, ENSG00000105647, ENSG00000155629, ENSG00000113721, ENSG00000171132, ENSG00000111642, ENSG00000150907, ENSG00000117020, ENSG00000078687, ENSG00000171608, ENSG0000…	1.28608	0.940519	1.18659	15	AdultHLip	Intracellular signaling by second messengers
REACTOME_PATHWAY	R-HSA-6811558~PI5P, PP2A and IER3 Regulate PI3K/AKT Signaling	ENSG00000105647, ENSG00000141968, ENSG00000019991, ENSG00000171608, ENSG00000155629, ENSG00000066468, ENSG00000113721, ENSG00000100311, ENSG00000179295, ENSG00000010810, ENSG00000163235, ENSG00000033327	1.55636	0.96	1.18659	15	AdultHLip	PI5P, PP2A and IER3 Regulate PI3K/AKT Signaling
REACTOME_PATHWAY	R-HSA-1257604~PIP3 activates AKT signaling	ENSG00000019991, ENSG00000141968, ENSG00000066468, ENSG00000204673, ENSG00000025039, ENSG00000090905, ENSG00000143614, ENSG00000141570, ENSG00000132906, ENSG00000033327, ENSG00000179632, ENSG00000105647, ENSG00000155629, ENSG00000113721, ENSG00000111642, ENSG00000150907, ENSG00000117020, ENSG00000078687, ENSG00000171608, ENSG00000100354, ENSG00000179295, ENSG00000100311, ENSG00000010810, ENSG0000…	1.28244	0.96	1.18659	15	AdultHLip	PIP3 activates AKT signaling
REACTOME_PATHWAY	R-HSA-8876384~Listeria monocytogenes entry into host cells	ENSG00000198561, ENSG00000147010, ENSG00000140600, ENSG00000141985, ENSG00000110395	3.43695	0.592501	1.17077	16	AdultHLip	Listeria monocytogenes entry into host cells
REACTOME_PATHWAY	R-HSA-6807004~Negative regulation of MET activity	ENSG00000147010, ENSG00000019991, ENSG00000140600, ENSG00000141985, ENSG00000110395	3.27329	0.643448	1.17077	16	AdultHLip	Negative regulation of MET activity
REACTOME_PATHWAY	R-HSA-177929~Signaling by EGFR	ENSG00000148848, ENSG00000102606, ENSG00000147010, ENSG00000140600, ENSG00000179295, ENSG00000141985, ENSG00000163235, ENSG00000110395	2.19965	0.67514	1.17077	16	AdultHLip	Signaling by EGFR
REACTOME_PATHWAY	R-HSA-182971~EGFR downregulation	ENSG00000102606, ENSG00000147010, ENSG00000140600, ENSG00000141985, ENSG00000163235, ENSG00000110395	2.66087	0.685611	1.17077	16	AdultHLip	EGFR downregulation
REACTOME_PATHWAY	R-HSA-8875360~InlB-mediated entry of Listeria monocytogenes into host cell	ENSG00000147010, ENSG00000140600, ENSG00000141985, ENSG00000110395	3.66608	0.778592	1.17077	16	AdultHLip	InlB-mediated entry of Listeria monocytogenes into host cell
GOTERM_BP_DIRECT	GO:0045582~positive regulation of T cell differentiation	ENSG00000099956, ENSG00000169884, ENSG00000073584, ENSG00000168421, ENSG00000139613, ENSG00000080503, ENSG00000117713, ENSG00000108175	3.55665	0.351734	1.09816	17	AdultHLip	positive regulation of T cell differentiation
GOTERM_BP_DIRECT	GO:0045663~positive regulation of myoblast differentiation	ENSG00000099956, ENSG00000073584, ENSG00000140836, ENSG00000139613, ENSG00000080503, ENSG00000117713, ENSG00000146674, ENSG00000124766, ENSG00000182621	3.1314	0.360848	1.09816	17	AdultHLip	positive regulation of myoblast differentiation
GOTERM_BP_DIRECT	GO:0045597~positive regulation of cell differentiation	ENSG00000099956, ENSG00000073584, ENSG00000139613, ENSG00000115844, ENSG00000080503, ENSG00000117713, ENSG00000096968, ENSG00000138795, ENSG00000169083	2.48353	0.73686	1.09816	17	AdultHLip	positive regulation of cell differentiation
GOTERM_BP_DIRECT	GO:2000781~positive regulation of double-strand break repair	ENSG00000099956, ENSG00000073584, ENSG00000139613, ENSG00000080503, ENSG00000117713, ENSG00000204991, ENSG00000170430	2.66749	0.915399	1.09816	17	AdultHLip	positive regulation of double-strand break repair
REACTOME_PATHWAY	R-HSA-8939243~RUNX1 interacts with co-factors whose precise effect on RUNX1 targets is not known	ENSG00000099956, ENSG00000064393, ENSG00000141570, ENSG00000073584, ENSG00000139613, ENSG00000080503, ENSG00000117713	2.53249	0.601301	1.09816	17	AdultHLip	RUNX1 interacts with co-factors whose precise effect on RUNX1 targets is not known
GOTERM_BP_DIRECT	GO:0070316~regulation of G0 to G1 transition	ENSG00000099956, ENSG00000073584, ENSG00000139613, ENSG00000080503, ENSG00000117713	3.20099	0.992276	1.09816	17	AdultHLip	regulation of G0 to G1 transition
GOTERM_BP_DIRECT	GO:0030071~regulation of mitotic metaphase/anaphase transition	ENSG00000099956, ENSG00000073584, ENSG00000139613, ENSG00000080503, ENSG00000117713, ENSG00000138411	2.66749	0.992276	1.09816	17	AdultHLip	regulation of mitotic metaphase/anaphase transition
GOTERM_BP_DIRECT	GO:2000819~regulation of nucleotide-excision repair	ENSG00000099956, ENSG00000073584, ENSG00000139613, ENSG00000080503, ENSG00000117713	2.96388	0.992276	1.09816	17	AdultHLip	regulation of nucleotide-excision repair
GOTERM_BP_DIRECT	GO:0006337~nucleosome disassembly	ENSG00000099956, ENSG00000073584, ENSG00000139613, ENSG00000117713	3.36946	0.992276	1.09816	17	AdultHLip	nucleosome disassembly
GOTERM_BP_DIRECT	GO:2000045~regulation of G1/S transition of mitotic cell cycle	ENSG00000071564, ENSG00000099956, ENSG00000073584, ENSG00000111679, ENSG00000139613, ENSG00000080503, ENSG00000117713	2.07472	0.992276	1.09816	17	AdultHLip	regulation of G1/S transition of mitotic cell cycle
GOTERM_BP_DIRECT	GO:1902459~positive regulation of stem cell population maintenance	ENSG00000099956, ENSG00000073584, ENSG00000080503, ENSG00000117713	1.36212	0.992276	1.09816	17	AdultHLip	positive regulation of stem cell population maintenance
REACTOME_PATHWAY	R-HSA-3214858~RMTs methylate histone arginines	ENSG00000099956, ENSG00000073584, ENSG00000139613, ENSG00000080503, ENSG00000117713, ENSG00000096968	1.05752	0.96	1.09816	17	AdultHLip	RMTs methylate histone arginines
KEGG_PATHWAY	hsa04714:Thermogenesis	ENSG00000157613, ENSG00000099956, ENSG00000073584, ENSG00000198763, ENSG00000139613, ENSG00000080503, ENSG00000117713, ENSG00000204673, ENSG00000170516, ENSG00000160471, ENSG00000185386, ENSG00000183682, ENSG00000109424	0.787927	0.919505	1.09816	17	AdultHLip	Thermogenesis
REACTOME_PATHWAY	R-HSA-912631~Regulation of signaling by CBL	ENSG00000165025, ENSG00000105647, ENSG00000141968, ENSG00000171608, ENSG00000101336, ENSG00000107263, ENSG00000010810, ENSG00000110395	4.9992	0.0288298	1.07947	18	AdultHLip	Regulation of signaling by CBL
REACTOME_PATHWAY	R-HSA-389356~CD28 co-stimulation	ENSG00000117020, ENSG00000006062, ENSG00000105647, ENSG00000141968, ENSG00000149269, ENSG00000010810, ENSG00000100351	2.9162	0.390033	1.07947	18	AdultHLip	CD28 co-stimulation
REACTOME_PATHWAY	R-HSA-2730905~Role of LAT2/NTAL/LAB on calcium mobilization	ENSG00000165025, ENSG00000105647, ENSG00000010810, ENSG00000033327	3.43695	0.833852	1.07947	18	AdultHLip	Role of LAT2/NTAL/LAB on calcium mobilization
KEGG_PATHWAY	hsa04664:Fc epsilon RI signaling pathway	ENSG00000165025, ENSG00000117020, ENSG00000105647, ENSG00000168918, ENSG00000185386, ENSG00000141968, ENSG00000171608, ENSG00000010810, ENSG00000033327	1.86108	0.468701	1.07947	18	AdultHLip	Fc epsilon RI signaling pathway
REACTOME_PATHWAY	R-HSA-2424491~DAP12 signaling	ENSG00000165025, ENSG00000105647, ENSG00000010810, ENSG00000100351	1.83304	0.96	1.07947	18	AdultHLip	DAP12 signaling
REACTOME_PATHWAY	R-HSA-2454202~Fc epsilon receptor (FCERI) signaling	ENSG00000113263, ENSG00000096433, ENSG00000198286, ENSG00000165025, ENSG00000105647, ENSG00000141968, ENSG00000149269, ENSG00000010810, ENSG00000033327, ENSG00000171777, ENSG00000100351	1.12855	0.96	1.07947	18	AdultHLip	Fc epsilon receptor (FCERI) signaling
REACTOME_PATHWAY	R-HSA-2172127~DAP12 interactions	ENSG00000165025, ENSG00000105647, ENSG00000010810, ENSG00000100351	1.22203	0.96	1.07947	18	AdultHLip	DAP12 interactions
REACTOME_PATHWAY	R-HSA-2219528~PI3K/AKT Signaling in Cancer	ENSG00000105647, ENSG00000019991, ENSG00000141968, ENSG00000155629, ENSG00000113721, ENSG00000066468, ENSG00000204673, ENSG00000150907, ENSG00000117020, ENSG00000171608, ENSG00000100311, ENSG00000132906, ENSG00000179295, ENSG00000010810, ENSG00000163235, ENSG00000033327	2.11505	0.158904	1.07565	19	AdultHLip	PI3K/AKT Signaling in Cancer
KEGG_PATHWAY	hsa01521:EGFR tyrosine kinase inhibitor resistance	ENSG00000126583, ENSG00000105647, ENSG00000019991, ENSG00000128052, ENSG00000113721, ENSG00000066468, ENSG00000117020, ENSG00000171608, ENSG00000096968, ENSG00000100311, ENSG00000166501, ENSG00000163235, ENSG00000167601	2.31391	0.106928	1.07565	19	AdultHLip	EGFR tyrosine kinase inhibitor resistance
REACTOME_PATHWAY	R-HSA-2219530~Constitutive Signaling by Aberrant PI3K in Cancer	ENSG00000105647, ENSG00000141968, ENSG00000019991, ENSG00000171608, ENSG00000155629, ENSG00000066468, ENSG00000113721, ENSG00000100311, ENSG00000179295, ENSG00000010810, ENSG00000163235, ENSG00000033327	2.11505	0.352889	1.07565	19	AdultHLip	Constitutive Signaling by Aberrant PI3K in Cancer
KEGG_PATHWAY	hsa05211:Renal cell carcinoma	ENSG00000117020, ENSG00000105647, ENSG00000019991, ENSG00000171608, ENSG00000149269, ENSG00000100311, ENSG00000179295, ENSG00000107263, ENSG00000163235, ENSG00000172379	2.03789	0.348674	1.07565	19	AdultHLip	Renal cell carcinoma
REACTOME_PATHWAY	R-HSA-199418~Negative regulation of the PI3K/AKT network	ENSG00000105647, ENSG00000019991, ENSG00000141968, ENSG00000155629, ENSG00000113721, ENSG00000066468, ENSG00000117020, ENSG00000171608, ENSG00000100311, ENSG00000179295, ENSG00000010810, ENSG00000163235, ENSG00000033327	1.58161	0.89595	1.07565	19	AdultHLip	Negative regulation of the PI3K/AKT network
KEGG_PATHWAY	hsa05223:Non-small cell lung cancer	ENSG00000126583, ENSG00000155980, ENSG00000117020, ENSG00000105647, ENSG00000019991, ENSG00000171608, ENSG00000132906, ENSG00000166501, ENSG00000163235	1.75768	0.532118	1.07565	19	AdultHLip	Non-small cell lung cancer
REACTOME_PATHWAY	R-HSA-6811558~PI5P, PP2A and IER3 Regulate PI3K/AKT Signaling	ENSG00000105647, ENSG00000141968, ENSG00000019991, ENSG00000171608, ENSG00000155629, ENSG00000066468, ENSG00000113721, ENSG00000100311, ENSG00000179295, ENSG00000010810, ENSG00000163235, ENSG00000033327	1.55636	0.96	1.07565	19	AdultHLip	PI5P, PP2A and IER3 Regulate PI3K/AKT Signaling
KEGG_PATHWAY	hsa05214:Glioma	ENSG00000126583, ENSG00000117020, ENSG00000105647, ENSG00000171608, ENSG00000113721, ENSG00000100311, ENSG00000183049, ENSG00000166501, ENSG00000163235	1.68738	0.569719	1.07565	19	AdultHLip	Glioma
KEGG_PATHWAY	hsa04012:ErbB signaling pathway	ENSG00000126583, ENSG00000117020, ENSG00000105647, ENSG00000171608, ENSG00000149269, ENSG00000136997, ENSG00000166501, ENSG00000163235, ENSG00000110395	1.48886	0.688706	1.07565	19	AdultHLip	ErbB signaling pathway
KEGG_PATHWAY	hsa05231:Choline metabolism in cancer	ENSG00000126583, ENSG00000117020, ENSG00000105647, ENSG00000157680, ENSG00000171608, ENSG00000113721, ENSG00000100311, ENSG00000132970, ENSG00000115665, ENSG00000166501	1.43484	0.688706	1.07565	19	AdultHLip	Choline metabolism in cancer
KEGG_PATHWAY	hsa05218:Melanoma	ENSG00000117020, ENSG00000105647, ENSG00000019991, ENSG00000171608, ENSG00000113721, ENSG00000100311	1.17179	0.919505	1.07565	19	AdultHLip	Melanoma
GOTERM_BP_DIRECT	GO:0051056~regulation of small GTPase mediated signal transduction	ENSG00000134516, ENSG00000074964, ENSG00000023892, ENSG00000196220, ENSG00000141968, ENSG00000240771, ENSG00000089639, ENSG00000196914, ENSG00000102606, ENSG00000089820, ENSG00000128805, ENSG00000160145, ENSG00000100852, ENSG00000124126, ENSG00000102302, ENSG00000106069	2.15193	0.360848	1.03854	20	AdultHLip	regulation of small GTPase mediated signal transduction
REACTOME_PATHWAY	R-HSA-73887~Death Receptor Signaling	ENSG00000092098, ENSG00000177169, ENSG00000074964, ENSG00000141968, ENSG00000064300, ENSG00000196914, ENSG00000102606, ENSG00000121858, ENSG00000169783, ENSG00000040608, ENSG00000105270, ENSG00000106052, ENSG00000160145, ENSG00000124126, ENSG00000102302, ENSG00000126861, ENSG00000103266	1.51761	0.789819	1.03854	20	AdultHLip	Death Receptor Signaling
REACTOME_PATHWAY	R-HSA-416482~G alpha (12/13) signalling events	ENSG00000196914, ENSG00000074964, ENSG00000102606, ENSG00000143878, ENSG00000141968, ENSG00000160145, ENSG00000124126, ENSG00000102302, ENSG00000176533, ENSG00000069966	1.71848	0.923697	1.03854	20	AdultHLip	G alpha (12/13) signalling events
REACTOME_PATHWAY	R-HSA-193648~NRAGE signals death through JNK	ENSG00000196914, ENSG00000074964, ENSG00000102606, ENSG00000141968, ENSG00000064300, ENSG00000160145, ENSG00000124126, ENSG00000102302	1.86411	0.940519	1.03854	20	AdultHLip	NRAGE signals death through JNK
REACTOME_PATHWAY	R-HSA-193704~p75 NTR receptor-mediated signalling	ENSG00000196914, ENSG00000074964, ENSG00000102606, ENSG00000169783, ENSG00000141968, ENSG00000040608, ENSG00000064300, ENSG00000160145, ENSG00000124126, ENSG00000102302, ENSG00000126861	1.55903	0.96	1.03854	20	AdultHLip	p75 NTR receptor-mediated signalling
REACTOME_PATHWAY	R-HSA-204998~Cell death signalling via NRAGE, NRIF and NADE	ENSG00000196914, ENSG00000074964, ENSG00000102606, ENSG00000141968, ENSG00000064300, ENSG00000160145, ENSG00000124126, ENSG00000102302	1.44714	0.96	1.03854	20	AdultHLip	Cell death signalling via NRAGE, NRIF and NADE
REACTOME_PATHWAY	R-HSA-416993~Trafficking of GluR2-containing AMPA receptors	ENSG00000155511, ENSG00000126583, ENSG00000196961, ENSG00000166501, ENSG00000155974	4.04347	0.393469	1.02813	21	AdultHLip	Trafficking of GluR2-containing AMPA receptors
REACTOME_PATHWAY	R-HSA-399719~Trafficking of AMPA receptors	ENSG00000155511, ENSG00000166862, ENSG00000126583, ENSG00000196961, ENSG00000166501, ENSG00000155974	2.66087	0.685611	1.02813	21	AdultHLip	Trafficking of AMPA receptors
REACTOME_PATHWAY	R-HSA-399721~Glutamate binding, activation of AMPA receptors and synaptic plasticity	ENSG00000155511, ENSG00000166862, ENSG00000126583, ENSG00000196961, ENSG00000166501, ENSG00000155974	2.66087	0.685611	1.02813	21	AdultHLip	Glutamate binding, activation of AMPA receptors and synaptic plasticity
REACTOME_PATHWAY	R-HSA-5099900~WNT5A-dependent internalization of FZD4	ENSG00000114251, ENSG00000126583, ENSG00000196961, ENSG00000166501	3.66608	0.778592	1.02813	21	AdultHLip	WNT5A-dependent internalization of FZD4
KEGG_PATHWAY	hsa04961:Endocrine and other factor-regulated calcium reabsorption	ENSG00000126583, ENSG00000168398, ENSG00000196961, ENSG00000182621, ENSG00000166501	1.32655	0.919505	1.02813	21	AdultHLip	Endocrine and other factor-regulated calcium reabsorption
KEGG_PATHWAY	hsa04929:GnRH secretion	ENSG00000096433, ENSG00000151067, ENSG00000126583, ENSG00000117020, ENSG00000105647, ENSG00000162728, ENSG00000171608, ENSG00000204681, ENSG00000182621, ENSG00000166501	2.1971	0.2656	1.01787	22	AdultHLip	GnRH secretion
KEGG_PATHWAY	hsa04750:Inflammatory mediator regulation of TRP channels	ENSG00000096433, ENSG00000126583, ENSG00000168398, ENSG00000105647, ENSG00000185386, ENSG00000171608, ENSG00000135914, ENSG00000110881, ENSG00000171132, ENSG00000187688, ENSG00000182621, ENSG00000166501	1.72181	0.434307	1.01787	22	AdultHLip	Inflammatory mediator regulation of TRP channels
KEGG_PATHWAY	hsa04370:VEGF signaling pathway	ENSG00000126583, ENSG00000117020, ENSG00000105647, ENSG00000185386, ENSG00000171608, ENSG00000128052, ENSG00000132906, ENSG00000166501	1.90664	0.506628	1.01787	22	AdultHLip	VEGF signaling pathway
KEGG_PATHWAY	hsa04935:Growth hormone synthesis, secretion and action	ENSG00000157613, ENSG00000096433, ENSG00000151067, ENSG00000126583, ENSG00000105647, ENSG00000114353, ENSG00000117020, ENSG00000185386, ENSG00000171608, ENSG00000096968, ENSG00000146674, ENSG00000182621, ENSG00000166501	1.52333	0.532863	1.01787	22	AdultHLip	Growth hormone synthesis, secretion and action
KEGG_PATHWAY	hsa04070:Phosphatidylinositol signaling system	ENSG00000096433, ENSG00000003987, ENSG00000126583, ENSG00000138193, ENSG00000105647, ENSG00000168918, ENSG00000157680, ENSG00000171608, ENSG00000115556, ENSG00000182621, ENSG00000166501	1.5946	0.547175	1.01787	22	AdultHLip	Phosphatidylinositol signaling system
GOTERM_BP_DIRECT	GO:0007155~cell adhesion	ENSG00000150275, ENSG00000132205, ENSG00000136827, ENSG00000091136, ENSG00000133110, ENSG00000198910, ENSG00000243232, ENSG00000164176, ENSG00000113361, ENSG00000038427, ENSG00000185565, ENSG00000184113, ENSG00000143196, ENSG00000145681, ENSG00000123610, ENSG00000140678, ENSG00000126861, ENSG00000086062, ENSG00000165478, ENSG00000107562, ENSG00000163347, ENSG00000164007	4.1007	0.000109	3.51942	1	JuvenileHLip	cell adhesion
GOTERM_BP_DIRECT	GO:0030335~positive regulation of cell migration	ENSG00000183779, ENSG00000103241, ENSG00000091136, ENSG00000138623, ENSG00000123610, ENSG00000100311, ENSG00000261371, ENSG00000140678, ENSG00000107562, ENSG00000163347	4.00536	0.262466	3.51942	1	JuvenileHLip	positive regulation of cell migration
KEGG_PATHWAY	hsa04670:Leukocyte transendothelial migration	ENSG00000184113, ENSG00000101335, ENSG00000261371, ENSG00000107562, ENSG00000163347, ENSG00000164007	5.12099	0.222264	3.51942	1	JuvenileHLip	Leukocyte transendothelial migration
REACTOME_PATHWAY	R-HSA-1474244~Extracellular matrix organization	ENSG00000038427, ENSG00000132205, ENSG00000100448, ENSG00000091136, ENSG00000140092, ENSG00000145681, ENSG00000100311, ENSG00000261371, ENSG00000140678	2.73925	0.757079	3.51942	1	JuvenileHLip	Extracellular matrix organization
KEGG_PATHWAY	hsa04514:Cell adhesion molecules	ENSG00000038427, ENSG00000179542, ENSG00000162706, ENSG00000184113, ENSG00000198910, ENSG00000261371, ENSG00000158887, ENSG00000163347, ENSG00000164007, ENSG00000237541	6.19738	0.00524483	2.03303	2	JuvenileHLip	Cell adhesion molecules
REACTOME_PATHWAY	R-HSA-421270~Cell-cell junction organization	ENSG00000113361, ENSG00000103241, ENSG00000162706, ENSG00000184113, ENSG00000040731, ENSG00000163347, ENSG00000164007	7.98948	0.102499	2.03303	2	JuvenileHLip	Cell-cell junction organization
REACTOME_PATHWAY	R-HSA-446728~Cell junction organization	ENSG00000113361, ENSG00000103241, ENSG00000162706, ENSG00000184113, ENSG00000040731, ENSG00000163347, ENSG00000164007	5.97344	0.243114	2.03303	2	JuvenileHLip	Cell junction organization
GOTERM_BP_DIRECT	GO:0035633~maintenance of permeability of blood-brain barrier	ENSG00000197971, ENSG00000184113, ENSG00000261371, ENSG00000163347	12.7201	0.626631	2.03303	2	JuvenileHLip	maintenance of permeability of blood-brain barrier
REACTOME_PATHWAY	R-HSA-1500931~Cell-Cell communication	ENSG00000113361, ENSG00000103241, ENSG00000162706, ENSG00000184113, ENSG00000040731, ENSG00000163347, ENSG00000164007	4.40799	0.406686	2.03303	2	JuvenileHLip	Cell-Cell communication
KEGG_PATHWAY	hsa04670:Leukocyte transendothelial migration	ENSG00000184113, ENSG00000101335, ENSG00000261371, ENSG00000107562, ENSG00000163347, ENSG00000164007	5.12099	0.222264	2.03303	2	JuvenileHLip	Leukocyte transendothelial migration
GOTERM_BP_DIRECT	GO:0007156~homophilic cell adhesion via plasma membrane adhesion molecules	ENSG00000113361, ENSG00000150275, ENSG00000162706, ENSG00000198910, ENSG00000261371, ENSG00000040731, ENSG00000243232	4.22175	0.730114	2.03303	2	JuvenileHLip	homophilic cell adhesion via plasma membrane adhesion molecules
GOTERM_BP_DIRECT	GO:0070830~bicellular tight junction assembly	ENSG00000184113, ENSG00000261371, ENSG00000163347, ENSG00000164007	8.23063	1	2.03303	2	JuvenileHLip	bicellular tight junction assembly
REACTOME_PATHWAY	R-HSA-418990~Adherens junctions interactions	ENSG00000113361, ENSG00000103241, ENSG00000162706, ENSG00000040731	7.45374	0.757079	2.03303	2	JuvenileHLip	Adherens junctions interactions
GOTERM_BP_DIRECT	GO:0016338~calcium-independent cell-cell adhesion via plasma membrane cell-adhesion molecules	ENSG00000184113, ENSG00000163347, ENSG00000164007	14.9915	1	2.03303	2	JuvenileHLip	calcium-independent cell-cell adhesion via plasma membrane cell-adhesion molecules
REACTOME_PATHWAY	R-HSA-420029~Tight junction interactions	ENSG00000184113, ENSG00000163347, ENSG00000164007	9.44569	1	2.03303	2	JuvenileHLip	Tight junction interactions
GOTERM_BP_DIRECT	GO:0007043~cell-cell junction assembly	ENSG00000113361, ENSG00000184113, ENSG00000040731	6.84395	1	2.03303	2	JuvenileHLip	cell-cell junction assembly
KEGG_PATHWAY	hsa05130:Pathogenic Escherichia coli infection	ENSG00000184113, ENSG00000132906, ENSG00000163347, ENSG00000164007, ENSG00000175866	2.46951	1	2.03303	2	JuvenileHLip	Pathogenic Escherichia coli infection
KEGG_PATHWAY	hsa05160:Hepatitis C	ENSG00000184113, ENSG00000132906, ENSG00000163347, ENSG00000164007	2.47895	1	2.03303	2	JuvenileHLip	Hepatitis C
KEGG_PATHWAY	hsa04530:Tight junction	ENSG00000184113, ENSG00000101335, ENSG00000163347, ENSG00000164007	2.30293	1	2.03303	2	JuvenileHLip	Tight junction
KEGG_PATHWAY	hsa05204:Chemical carcinogenesis - DNA adducts	ENSG00000241635, ENSG00000021461, ENSG00000065621, ENSG00000213648, ENSG00000148834, ENSG00000167733	8.46077	0.0607165	1.695	3	JuvenileHLip	Chemical carcinogenesis - DNA adducts
KEGG_PATHWAY	hsa00980:Metabolism of xenobiotics by cytochrome P450	ENSG00000162482, ENSG00000241635, ENSG00000198099, ENSG00000065621, ENSG00000148834, ENSG00000167733	7.48453	0.0707973	1.695	3	JuvenileHLip	Metabolism of xenobiotics by cytochrome P450
REACTOME_PATHWAY	R-HSA-211859~Biological oxidations	ENSG00000162482, ENSG00000241635, ENSG00000198075, ENSG00000198099, ENSG00000021461, ENSG00000099998, ENSG00000065621, ENSG00000213648, ENSG00000148834	3.70169	0.406686	1.695	3	JuvenileHLip	Biological oxidations
REACTOME_PATHWAY	R-HSA-9753281~Paracetamol ADME	ENSG00000241635, ENSG00000198075, ENSG00000099998, ENSG00000213648	12.5943	0.406686	1.695	3	JuvenileHLip	Paracetamol ADME
REACTOME_PATHWAY	R-HSA-156580~Phase II - Conjugation of compounds	ENSG00000241635, ENSG00000198075, ENSG00000099998, ENSG00000065621, ENSG00000213648, ENSG00000148834	5.02615	0.429142	1.695	3	JuvenileHLip	Phase II - Conjugation of compounds
REACTOME_PATHWAY	R-HSA-9748784~Drug ADME	ENSG00000241635, ENSG00000198075, ENSG00000176387, ENSG00000099998, ENSG00000213648	4.15038	1	1.695	3	JuvenileHLip	Drug ADME
KEGG_PATHWAY	hsa00982:Drug metabolism - cytochrome P450	ENSG00000241635, ENSG00000198099, ENSG00000065621, ENSG00000148834	5.40549	0.854461	1.695	3	JuvenileHLip	Drug metabolism - cytochrome P450
REACTOME_PATHWAY	R-HSA-156590~Glutathione conjugation	ENSG00000099998, ENSG00000065621, ENSG00000148834	7.60903	1	1.695	3	JuvenileHLip	Glutathione conjugation
GOTERM_BP_DIRECT	GO:0006805~xenobiotic metabolic process	ENSG00000241635, ENSG00000198075, ENSG00000065621, ENSG00000213648	3.71471	1	1.695	3	JuvenileHLip	xenobiotic metabolic process
KEGG_PATHWAY	hsa00480:Glutathione metabolism	ENSG00000099998, ENSG00000065621, ENSG00000148834	5.12099	1	1.695	3	JuvenileHLip	Glutathione metabolism
KEGG_PATHWAY	hsa00983:Drug metabolism - other enzymes	ENSG00000241635, ENSG00000065621, ENSG00000148834	3.64871	1	1.695	3	JuvenileHLip	Drug metabolism - other enzymes
KEGG_PATHWAY	hsa05207:Chemical carcinogenesis - receptor activation	ENSG00000241635, ENSG00000065621, ENSG00000148834	1.37687	1	1.695	3	JuvenileHLip	Chemical carcinogenesis - receptor activation
GOTERM_BP_DIRECT	GO:0009312~oligosaccharide biosynthetic process	ENSG00000117069, ENSG00000169255, ENSG00000086062, ENSG00000162630, ENSG00000070526, ENSG00000167080	24.217	0.00232451	1.386	4	JuvenileHLip	oligosaccharide biosynthetic process
GOTERM_BP_DIRECT	GO:0006486~protein glycosylation	ENSG00000117069, ENSG00000169255, ENSG00000198488, ENSG00000086062, ENSG00000162630, ENSG00000070526, ENSG00000008513	6.22529	0.262466	1.386	4	JuvenileHLip	protein glycosylation
REACTOME_PATHWAY	R-HSA-4085001~Sialic acid metabolism	ENSG00000117069, ENSG00000095380, ENSG00000070526, ENSG00000008513	11.0677	0.406686	1.386	4	JuvenileHLip	Sialic acid metabolism
GOTERM_BP_DIRECT	GO:0097503~sialylation	ENSG00000117069, ENSG00000070526, ENSG00000008513	16.5696	1	1.386	4	JuvenileHLip	sialylation
REACTOME_PATHWAY	R-HSA-446219~Synthesis of substrates in N-glycan biosythesis	ENSG00000117069, ENSG00000095380, ENSG00000070526, ENSG00000008513	5.79735	1	1.386	4	JuvenileHLip	Synthesis of substrates in N-glycan biosythesis
KEGG_PATHWAY	hsa00512:Mucin type O-glycan biosynthesis	ENSG00000198488, ENSG00000070526, ENSG00000008513	8.10824	1	1.386	4	JuvenileHLip	Mucin type O-glycan biosynthesis
REACTOME_PATHWAY	R-HSA-446193~Biosynthesis of the N-glycan precursor (dolichol lipid-linked oligosaccharide, LLO) and transfer to a nascent protein	ENSG00000117069, ENSG00000095380, ENSG00000070526, ENSG00000008513	4.68248	1	1.386	4	JuvenileHLip	Biosynthesis of the N-glycan precursor (dolichol lipid-linked oligosaccharide, LLO) and transfer to a nascent protein
KEGG_PATHWAY	hsa01100:Metabolic pathways	ENSG00000241635, ENSG00000198099, ENSG00000198650, ENSG00000198488, ENSG00000176387, ENSG00000174990, ENSG00000074410, ENSG00000099998, ENSG00000095380, ENSG00000150787, ENSG00000065621, ENSG00000008513, ENSG00000117069, ENSG00000101846, ENSG00000169255, ENSG00000165996, ENSG00000086062, ENSG00000162630, ENSG00000148834, ENSG00000100078, ENSG00000164303, ENSG00000167733, ENSG00000070526	1.45222	1	1.386	4	JuvenileHLip	Metabolic pathways
REACTOME_PATHWAY	R-HSA-381426~Regulation of Insulin-like Growth Factor (IGF) transport and uptake by Insulin-like Growth Factor Binding Proteins (IGFBPs)	ENSG00000038427, ENSG00000100448, ENSG00000091136, ENSG00000109501	2.92187	1	1.386	4	JuvenileHLip	Regulation of Insulin-like Growth Factor (IGF) transport and uptake by Insulin-like Growth Factor Binding Proteins (IGFBPs)
REACTOME_PATHWAY	R-HSA-446203~Asparagine N-linked glycosylation	ENSG00000117069, ENSG00000095380, ENSG00000086062, ENSG00000070526, ENSG00000008513, ENSG00000167080	1.80214	1	1.386	4	JuvenileHLip	Asparagine N-linked glycosylation
REACTOME_PATHWAY	R-HSA-8957275~Post-translational protein phosphorylation	ENSG00000038427, ENSG00000091136, ENSG00000109501	2.53634	1	1.386	4	JuvenileHLip	Post-translational protein phosphorylation
REACTOME_PATHWAY	R-HSA-1630316~Glycosaminoglycan metabolism	ENSG00000038427, ENSG00000086062, ENSG00000008513	2.20907	1	1.386	4	JuvenileHLip	Glycosaminoglycan metabolism
REACTOME_PATHWAY	R-HSA-71387~Metabolism of carbohydrates	ENSG00000038427, ENSG00000086062, ENSG00000162630, ENSG00000008513, ENSG00000167080	1.53718	1	1.386	4	JuvenileHLip	Metabolism of carbohydrates
REACTOME_PATHWAY	R-HSA-597592~Post-translational protein modification	ENSG00000127585, ENSG00000198488, ENSG00000111339, ENSG00000091136, ENSG00000095380, ENSG00000119042, ENSG00000167080, ENSG00000008513, ENSG00000038427, ENSG00000117069, ENSG00000101846, ENSG00000185565, ENSG00000086062, ENSG00000109501, ENSG00000070526	0.950468	1	1.386	4	JuvenileHLip	Post-translational protein modification
REACTOME_PATHWAY	R-HSA-392499~Metabolism of proteins	ENSG00000127585, ENSG00000198488, ENSG00000111339, ENSG00000091136, ENSG00000095380, ENSG00000119042, ENSG00000167080, ENSG00000008513, ENSG00000038427, ENSG00000117069, ENSG00000100448, ENSG00000101846, ENSG00000185565, ENSG00000086062, ENSG00000109501, ENSG00000070526	0.741591	1	1.386	4	JuvenileHLip	Metabolism of proteins
GOTERM_BP_DIRECT	GO:0030335~positive regulation of cell migration	ENSG00000183779, ENSG00000103241, ENSG00000091136, ENSG00000138623, ENSG00000123610, ENSG00000100311, ENSG00000261371, ENSG00000140678, ENSG00000107562, ENSG00000163347	4.00536	0.262466	1.07261	5	JuvenileHLip	positive regulation of cell migration
KEGG_PATHWAY	hsa04810:Regulation of actin cytoskeleton	ENSG00000101335, ENSG00000100311, ENSG00000140678, ENSG00000107562, ENSG00000039537, ENSG00000175866	2.54931	1	1.07261	5	JuvenileHLip	Regulation of actin cytoskeleton
KEGG_PATHWAY	hsa05200:Pathways in cancer	ENSG00000158955, ENSG00000081059, ENSG00000204301, ENSG00000091136, ENSG00000111432, ENSG00000065621, ENSG00000100311, ENSG00000132906, ENSG00000107562, ENSG00000148834	1.83237	1	1.07261	5	JuvenileHLip	Pathways in cancer
REACTOME_PATHWAY	R-HSA-9006934~Signaling by Receptor Tyrosine Kinases	ENSG00000109758, ENSG00000091136, ENSG00000100311, ENSG00000107562, ENSG00000106211, ENSG00000175866	1.04552	1	1.07261	5	JuvenileHLip	Signaling by Receptor Tyrosine Kinases
REACTOME_PATHWAY	R-HSA-162582~Signal Transduction	ENSG00000158955, ENSG00000109758, ENSG00000198099, ENSG00000278195, ENSG00000091136, ENSG00000111432, ENSG00000173585, ENSG00000025039, ENSG00000175866, ENSG00000167641, ENSG00000081059, ENSG00000204301, ENSG00000105270, ENSG00000101335, ENSG00000164736, ENSG00000100311, ENSG00000132906, ENSG00000146013, ENSG00000126861, ENSG00000086062, ENSG00000107562, ENSG00000106211	0.775592	1	1.07261	5	JuvenileHLip	Signal Transduction
GOTERM_BP_DIRECT	GO:0098609~cell-cell adhesion	ENSG00000103241, ENSG00000125810, ENSG00000261371, ENSG00000140678, ENSG00000040731, ENSG00000121552, ENSG00000175866	3.7671	1	0.90003	6	JuvenileHLip	cell-cell adhesion
REACTOME_PATHWAY	R-HSA-6798695~Neutrophil degranulation	ENSG00000163661, ENSG00000100448, ENSG00000121053, ENSG00000123610, ENSG00000125810, ENSG00000261371, ENSG00000140678, ENSG00000155093, ENSG00000086062, ENSG00000171236	1.8983	1	0.90003	6	JuvenileHLip	Neutrophil degranulation
REACTOME_PATHWAY	R-HSA-168249~Innate Immune System	ENSG00000261371, ENSG00000171236, ENSG00000004139, ENSG00000175866, ENSG00000163661, ENSG00000100448, ENSG00000121053, ENSG00000123610, ENSG00000125810, ENSG00000140678, ENSG00000155093, ENSG00000132906, ENSG00000086062, ENSG00000039537	1.19693	1	0.90003	6	JuvenileHLip	Innate Immune System
REACTOME_PATHWAY	R-HSA-168256~Immune System	ENSG00000127585, ENSG00000112763, ENSG00000204475, ENSG00000261371, ENSG00000171236, ENSG00000004139, ENSG00000175866, ENSG00000158270, ENSG00000163661, ENSG00000100448, ENSG00000121053, ENSG00000123610, ENSG00000125810, ENSG00000140678, ENSG00000155093, ENSG00000132906, ENSG00000086062, ENSG00000148834, ENSG00000039537, ENSG00000237541	0.901811	1	0.90003	6	JuvenileHLip	Immune System
KEGG_PATHWAY	hsa04310:Wnt signaling pathway	ENSG00000158955, ENSG00000081059, ENSG00000145506, ENSG00000111432, ENSG00000164736, ENSG00000162998, ENSG00000132386	3.98299	0.240602	0.809129	7	JuvenileHLip	Wnt signaling pathway
GOTERM_BP_DIRECT	GO:0060070~canonical Wnt signaling pathway	ENSG00000158955, ENSG00000081059, ENSG00000111432, ENSG00000162998	4.11532	1	0.809129	7	JuvenileHLip	canonical Wnt signaling pathway
KEGG_PATHWAY	hsa05200:Pathways in cancer	ENSG00000158955, ENSG00000081059, ENSG00000204301, ENSG00000091136, ENSG00000111432, ENSG00000065621, ENSG00000100311, ENSG00000132906, ENSG00000107562, ENSG00000148834	1.83237	1	0.809129	7	JuvenileHLip	Pathways in cancer
KEGG_PATHWAY	hsa05225:Hepatocellular carcinoma	ENSG00000158955, ENSG00000081059, ENSG00000111432, ENSG00000065621, ENSG00000148834	2.8958	1	0.809129	7	JuvenileHLip	Hepatocellular carcinoma
GOTERM_BP_DIRECT	GO:0016055~Wnt signaling pathway	ENSG00000158955, ENSG00000081059, ENSG00000145506, ENSG00000164736, ENSG00000162998	2.69078	1	0.809129	7	JuvenileHLip	Wnt signaling pathway
KEGG_PATHWAY	hsa05217:Basal cell carcinoma	ENSG00000158955, ENSG00000081059, ENSG00000111432	4.63328	1	0.809129	7	JuvenileHLip	Basal cell carcinoma
KEGG_PATHWAY	hsa05224:Breast cancer	ENSG00000158955, ENSG00000081059, ENSG00000204301, ENSG00000111432	2.64759	1	0.809129	7	JuvenileHLip	Breast cancer
KEGG_PATHWAY	hsa04390:Hippo signaling pathway	ENSG00000158955, ENSG00000081059, ENSG00000145506, ENSG00000111432	2.47895	1	0.809129	7	JuvenileHLip	Hippo signaling pathway
KEGG_PATHWAY	hsa04916:Melanogenesis	ENSG00000158955, ENSG00000081059, ENSG00000111432	2.89006	1	0.809129	7	JuvenileHLip	Melanogenesis
KEGG_PATHWAY	hsa04550:Signaling pathways regulating pluripotency of stem cells	ENSG00000158955, ENSG00000081059, ENSG00000111432	2.04123	1	0.809129	7	JuvenileHLip	Signaling pathways regulating pluripotency of stem cells
KEGG_PATHWAY	hsa05165:Human papillomavirus infection	ENSG00000158955, ENSG00000081059, ENSG00000204301, ENSG00000091136, ENSG00000111432	1.46977	1	0.809129	7	JuvenileHLip	Human papillomavirus infection
KEGG_PATHWAY	hsa05226:Gastric cancer	ENSG00000158955, ENSG00000081059, ENSG00000111432	1.95904	1	0.809129	7	JuvenileHLip	Gastric cancer
KEGG_PATHWAY	hsa04934:Cushing syndrome	ENSG00000158955, ENSG00000081059, ENSG00000111432	1.8832	1	0.809129	7	JuvenileHLip	Cushing syndrome
GOTERM_BP_DIRECT	GO:0007399~nervous system development	ENSG00000158747, ENSG00000102924, ENSG00000169554, ENSG00000138623, ENSG00000185565, ENSG00000198910, ENSG00000146013, ENSG00000004139, ENSG00000243232	2.51054	1	0.626755	8	JuvenileHLip	nervous system development
GOTERM_BP_DIRECT	GO:0007411~axon guidance	ENSG00000138623, ENSG00000198910, ENSG00000146013, ENSG00000107562	2.20927	1	0.626755	8	JuvenileHLip	axon guidance
KEGG_PATHWAY	hsa04360:Axon guidance	ENSG00000138623, ENSG00000101335, ENSG00000198910, ENSG00000107562	2.13844	1	0.626755	8	JuvenileHLip	Axon guidance
REACTOME_PATHWAY	R-HSA-1266738~Developmental Biology	ENSG00000103241, ENSG00000091136, ENSG00000197971, ENSG00000138623, ENSG00000175445, ENSG00000198910, ENSG00000158887, ENSG00000164330, ENSG00000166862, ENSG00000081059, ENSG00000101335, ENSG00000164736, ENSG00000146013, ENSG00000107562, ENSG00000121552	1.17262	1	0.626755	8	JuvenileHLip	Developmental Biology
REACTOME_PATHWAY	R-HSA-9675108~Nervous system development	ENSG00000091136, ENSG00000197971, ENSG00000138623, ENSG00000101335, ENSG00000198910, ENSG00000146013, ENSG00000107562, ENSG00000158887	1.26378	1	0.626755	8	JuvenileHLip	Nervous system development
REACTOME_PATHWAY	R-HSA-422475~Axon guidance	ENSG00000091136, ENSG00000138623, ENSG00000101335, ENSG00000198910, ENSG00000146013, ENSG00000107562	0.990687	1	0.626755	8	JuvenileHLip	Axon guidance
REACTOME_PATHWAY	R-HSA-9662361~Sensory processing of sound by outer hair cells of the cochlea	ENSG00000150275, ENSG00000095397, ENSG00000247596	5.07269	1	0.6219	9	JuvenileHLip	Sensory processing of sound by outer hair cells of the cochlea
REACTOME_PATHWAY	R-HSA-9662360~Sensory processing of sound by inner hair cells of the cochlea	ENSG00000150275, ENSG00000095397, ENSG00000247596	3.96993	1	0.6219	9	JuvenileHLip	Sensory processing of sound by inner hair cells of the cochlea
REACTOME_PATHWAY	R-HSA-9659379~Sensory processing of sound	ENSG00000150275, ENSG00000095397, ENSG00000247596	3.60428	1	0.6219	9	JuvenileHLip	Sensory processing of sound
REACTOME_PATHWAY	R-HSA-9709957~Sensory Perception	ENSG00000164330, ENSG00000197580, ENSG00000150275, ENSG00000095397, ENSG00000175445, ENSG00000247596	0.882206	1	0.6219	9	JuvenileHLip	Sensory Perception
REACTOME_PATHWAY	R-HSA-114608~Platelet degranulation	ENSG00000163815, ENSG00000172432, ENSG00000100311, ENSG00000261371	2.83127	1	0.558509	10	JuvenileHLip	Platelet degranulation
REACTOME_PATHWAY	R-HSA-76005~Response to elevated platelet cytosolic Ca2+	ENSG00000163815, ENSG00000172432, ENSG00000100311, ENSG00000261371	2.72562	1	0.558509	10	JuvenileHLip	Response to elevated platelet cytosolic Ca2+
REACTOME_PATHWAY	R-HSA-109582~Hemostasis	ENSG00000231924, ENSG00000101280, ENSG00000163815, ENSG00000162897, ENSG00000172432, ENSG00000198910, ENSG00000100311, ENSG00000261371, ENSG00000140678	1.32331	1	0.558509	10	JuvenileHLip	Hemostasis
REACTOME_PATHWAY	R-HSA-76002~Platelet activation, signaling and aggregation	ENSG00000163815, ENSG00000172432, ENSG00000100311, ENSG00000261371	1.38872	1	0.558509	10	JuvenileHLip	Platelet activation, signaling and aggregation

## Sheet: Supplementary File 1e
gene_id	a.value	m.value	p.value	q.value	rank	label
ENSMZEG00005018775	6.57907	8.99005	6.15283e-10	9.94568e-06	1	Victoria_Juvenile
ENSMZEG00005027513	4.7743	7.45866	6.94968e-10	9.94568e-06	2	Victoria_Juvenile
ENSMZEG00005025243	6.97623	6.12415	1.60828e-09	1.5344e-05	3	Victoria_Juvenile
ENSMZEG00005007356	4.80051	11.0743	2.20303e-09	1.57638e-05	4	Victoria_Juvenile
ENSMZEG00005024195	6.23122	6.82673	3.46346e-09	1.98262e-05	5	Victoria_Juvenile
ENSMZEG00005018766	5.54408	9.72235	5.84526e-09	2.78838e-05	6	Victoria_Juvenile
ENSMZEG00005006143	3.74907	-8.3795	1.98148e-08	7.73182e-05	7	Victoria_Juvenile
ENSMZEG00005010150	5.95516	7.89852	2.16109e-08	7.73182e-05	8	Victoria_Juvenile
ENSMZEG00005005524	-7.8522	16.2808	7.64723e-08	0.000218161	9	Victoria_Juvenile
ENSMZEG00005027549	6.78312	6.67691	8.77415e-08	0.000218161	10	Victoria_Juvenile
ENSMZEG00005021488	5.17947	-4.89596	8.88476e-08	0.000218161	11	Victoria_Juvenile
ENSMZEG00005019286	8.86434	2.99235	9.72719e-08	0.000218161	12	Victoria_Juvenile
ENSMZEG00005009436	6.31584	-5.8374	1.0197e-07	0.000218161	13	Victoria_Juvenile
ENSMZEG00005026113	3.04032	-7.28889	1.2302e-07	0.000218161	14	Victoria_Juvenile
ENSMZEG00005013343	2.49674	8.46674	1.23795e-07	0.000218161	15	Victoria_Juvenile
ENSMZEG00005011462	6.455	-4.55735	1.25764e-07	0.000218161	16	Victoria_Juvenile
ENSMZEG00005012890	4.90749	5.73902	1.29576e-07	0.000218161	17	Victoria_Juvenile
ENSMZEG00005020277	5.71691	-6.87816	1.41554e-07	0.000225086	18	Victoria_Juvenile
ENSMZEG00005021345	8.79392	-2.86673	1.94454e-07	0.000292929	19	Victoria_Juvenile
ENSMZEG00005013804	3.75985	-5.73855	2.06115e-07	0.000294972	20	Victoria_Juvenile
ENSMZEG00005011238	3.69568	6.72299	2.49924e-07	0.000328853	21	Victoria_Juvenile
ENSMZEG00005019123	3.07614	8.50674	2.5277e-07	0.000328853	22	Victoria_Juvenile
ENSMZEG00005014413	3.55977	7.42287	2.77255e-07	0.000345025	23	Victoria_Juvenile
ENSMZEG00005014251	4.31622	6.32248	3.19072e-07	0.00035964	24	Victoria_Juvenile
ENSMZEG00005001632	3.5253	-6.39317	3.20208e-07	0.00035964	25	Victoria_Juvenile
ENSMZEG00005023909	4.4579	4.84358	3.4076e-07	0.00035964	26	Victoria_Juvenile
ENSMZEG00005004119	4.87989	-7.05666	3.51119e-07	0.00035964	27	Victoria_Juvenile
ENSMZEG00005014379	3.69377	-5.08298	3.53252e-07	0.00035964	28	Victoria_Juvenile
ENSMZEG00005021247	4.44843	-4.64891	3.6439e-07	0.00035964	29	Victoria_Juvenile
ENSMZEG00005001073	4.70592	4.53972	4.41512e-07	0.000421232	30	Victoria_Juvenile
ENSMZEG00005009997	7.65453	3.08875	4.90936e-07	0.000453277	31	Victoria_Juvenile
ENSMZEG00005007795	3.92942	-6.52245	5.21288e-07	0.000466259	32	Victoria_Juvenile
ENSMZEG00005015994	5.52022	-6.89641	5.84531e-07	0.000498105	33	Victoria_Juvenile
ENSMZEG00005015750	4.37555	5.24683	5.91698e-07	0.000498105	34	Victoria_Juvenile
ENSMZEG00005022280	10.9965	-2.67647	7.03667e-07	0.000575439	35	Victoria_Juvenile
ENSMZEG00005022128	9.50528	-2.25477	8.08922e-07	0.000626335	36	Victoria_Juvenile
ENSMZEG00005005623	3.09559	-6.55879	8.106e-07	0.000626335	37	Victoria_Juvenile
ENSMZEG00005014030	5.53765	-4.10613	8.31554e-07	0.000626335	38	Victoria_Juvenile
ENSMZEG00005023454	2.34343	8.16013	8.97562e-07	0.000658718	39	Victoria_Juvenile
ENSMZEG00005004688	7.04715	3.60843	9.32744e-07	0.000667425	40	Victoria_Juvenile
ENSMZEG00005000341	7.35251	2.90658	9.81095e-07	0.0006849	41	Victoria_Juvenile
ENSMZEG00005010564	8.1932	-2.25531	1.00644e-06	0.000685862	42	Victoria_Juvenile
ENSMZEG00005024683	5.36679	-6.56367	1.06766e-06	0.000710667	43	Victoria_Juvenile
ENSMZEG00005022521	9.06512	-2.01251	1.20716e-06	0.000785258	44	Victoria_Juvenile
ENSMZEG00005015361	3.09014	-8.0624	1.34346e-06	0.000838447	45	Victoria_Juvenile
ENSMZEG00005001853	4.54829	-6.39346	1.34751e-06	0.000838447	46	Victoria_Juvenile
ENSMZEG00005012507	8.79719	2.42306	1.38422e-06	0.000842961	47	Victoria_Juvenile
ENSMZEG00005024951	2.02355	-7.37414	1.44414e-06	0.000861128	48	Victoria_Juvenile
ENSMZEG00005001766	4.49679	4.61732	1.48331e-06	0.000866435	49	Victoria_Juvenile
ENSMZEG00005021503	3.77474	-4.49198	1.59754e-06	0.00089845	50	Victoria_Juvenile
ENSMZEG00005017841	4.03689	-4.22618	1.6009e-06	0.00089845	51	Victoria_Juvenile
ENSMZEG00005014061	3.80944	-5.83774	1.69644e-06	0.000926688	52	Victoria_Juvenile
ENSMZEG00005009172	7.71618	-2.35817	1.749e-06	0.000926688	53	Victoria_Juvenile
ENSMZEG00005002433	5.80218	3.53644	1.7537e-06	0.000926688	54	Victoria_Juvenile
ENSMZEG00005020206	10.5994	3.88326	1.78072e-06	0.000926688	55	Victoria_Juvenile
ENSMZEG00005028509	5.53775	-5.65134	1.84327e-06	0.000942106	56	Victoria_Juvenile
ENSMZEG00005021255	5.8147	-3.32732	1.9311e-06	0.000948759	57	Victoria_Juvenile
ENSMZEG00005010994	9.27886	2.52063	1.93129e-06	0.000948759	58	Victoria_Juvenile
ENSMZEG00005027564	7.19771	-2.3608	1.99022e-06	0.000948759	59	Victoria_Juvenile
ENSMZEG00005001637	5.44994	-3.83142	2.05004e-06	0.000948759	60	Victoria_Juvenile
ENSMZEG00005017126	5.66199	4.07323	2.06102e-06	0.000948759	61	Victoria_Juvenile
ENSMZEG00005010622	3.73467	6.18489	2.07462e-06	0.000948759	62	Victoria_Juvenile
ENSMZEG00005027064	4.96069	-4.17671	2.11824e-06	0.000948759	63	Victoria_Juvenile
ENSMZEG00005010847	-7.8522	12.705	2.12146e-06	0.000948759	64	Victoria_Juvenile
ENSMZEG00005001368	6.4718	-6.10929	2.2547e-06	0.000992832	65	Victoria_Juvenile
ENSMZEG00005004766	5.25289	-3.76385	2.42506e-06	0.00105167	66	Victoria_Juvenile
ENSMZEG00005001473	4.39593	-3.67181	2.59038e-06	0.0011066	67	Victoria_Juvenile
ENSMZEG00005016939	6.32376	-5.07042	2.70725e-06	0.00112628	68	Victoria_Juvenile
ENSMZEG00005001871	4.13626	4.6315	2.71516e-06	0.00112628	69	Victoria_Juvenile
ENSMZEG00005013868	6.64575	-2.27365	2.83227e-06	0.00115807	70	Victoria_Juvenile
ENSMZEG00005007557	11.0077	-1.99861	3.09347e-06	0.00124706	71	Victoria_Juvenile
ENSMZEG00005008254	6.96692	2.21823	3.39456e-06	0.001348	72	Victoria_Juvenile
ENSMZEG00005028432	2.7184	5.15464	3.46689e-06	0.001348	73	Victoria_Juvenile
ENSMZEG00005009809	-7.8522	13.3512	3.48515e-06	0.001348	74	Victoria_Juvenile
ENSMZEG00005019377	2.64041	-6.60787	3.64356e-06	0.00139048	75	Victoria_Juvenile
ENSMZEG00005013041	6.1206	-3.58226	3.74768e-06	0.0014114	76	Victoria_Juvenile
ENSMZEG00005007859	6.57866	-3.41895	3.98979e-06	0.00147354	77	Victoria_Juvenile
ENSMZEG00005020017	5.58305	3.28744	4.0432e-06	0.00147354	78	Victoria_Juvenile
ENSMZEG00005013389	8.39632	3.60083	4.06715e-06	0.00147354	79	Victoria_Juvenile
ENSMZEG00005025677	8.47381	-2.39258	4.16166e-06	0.00148894	80	Victoria_Juvenile
ENSMZEG00005014068	-7.8522	-12.969	4.25912e-06	0.00150499	81	Victoria_Juvenile
ENSMZEG00005015210	6.50148	-2.59638	4.45469e-06	0.00153557	82	Victoria_Juvenile
ENSMZEG00005005031	1.8854	7.24406	4.48496e-06	0.00153557	83	Victoria_Juvenile
ENSMZEG00005025802	7.69233	-2.39313	4.5066e-06	0.00153557	84	Victoria_Juvenile
ENSMZEG00005019728	5.31821	6.11472	4.88359e-06	0.00163521	85	Victoria_Juvenile
ENSMZEG00005013689	-7.8522	12.4723	4.94347e-06	0.00163521	86	Victoria_Juvenile
ENSMZEG00005013901	3.68523	5.08433	4.9704e-06	0.00163521	87	Victoria_Juvenile
ENSMZEG00005013231	7.86937	6.87781	5.12207e-06	0.00166595	88	Victoria_Juvenile
ENSMZEG00005003609	3.36936	5.88672	5.18286e-06	0.00166678	89	Victoria_Juvenile
ENSMZEG00005021309	7.3639	-2.1137	5.63581e-06	0.00179231	90	Victoria_Juvenile
ENSMZEG00005021681	9.52084	1.69882	5.80739e-06	0.00182658	91	Victoria_Juvenile
ENSMZEG00005011418	8.96404	-1.8331	5.88969e-06	0.00183233	92	Victoria_Juvenile
ENSMZEG00005007098	2.60563	4.9291	6.08294e-06	0.00187211	93	Victoria_Juvenile
ENSMZEG00005001295	4.87036	-3.89953	6.29375e-06	0.00189263	94	Victoria_Juvenile
ENSMZEG00005024109	7.348	-2.20545	6.3728e-06	0.00189263	95	Victoria_Juvenile
ENSMZEG00005003365	3.5339	-5.56321	6.39211e-06	0.00189263	96	Victoria_Juvenile
ENSMZEG00005007116	7.17302	2.34108	6.41412e-06	0.00189263	97	Victoria_Juvenile
ENSMZEG00005005619	8.03523	-2.75528	6.54276e-06	0.00191089	98	Victoria_Juvenile
ENSMZEG00005026599	10.6963	1.78303	6.69678e-06	0.00193611	99	Victoria_Juvenile
ENSMZEG00005022458	5.55229	3.96859	6.85998e-06	0.00196346	100	Victoria_Juvenile
ENSMZEG00005026713	4.79423	-3.41742	6.93425e-06	0.00196507	101	Victoria_Juvenile
ENSMZEG00005028604	5.86864	3.1951	7.44759e-06	0.00205854	102	Victoria_Juvenile
ENSMZEG00005020282	5.97585	-6.37723	7.4717e-06	0.00205854	103	Victoria_Juvenile
ENSMZEG00005001049	2.03627	6.42699	7.47986e-06	0.00205854	104	Victoria_Juvenile
ENSMZEG00005013111	2.1649	-5.81325	7.69413e-06	0.00209735	105	Victoria_Juvenile
ENSMZEG00005004329	7.46914	-2.02027	7.93727e-06	0.00214321	106	Victoria_Juvenile
ENSMZEG00005003080	2.4992	-6.32544	8.20155e-06	0.00219388	107	Victoria_Juvenile
ENSMZEG00005017133	4.3602	-3.34965	8.44724e-06	0.00223868	108	Victoria_Juvenile
ENSMZEG00005017476	6.66459	2.47011	8.58069e-06	0.00225318	109	Victoria_Juvenile
ENSMZEG00005007147	6.56711	-3.18971	8.67202e-06	0.00225646	110	Victoria_Juvenile
ENSMZEG00005014607	9.45119	-1.58688	9.23489e-06	0.00238127	111	Victoria_Juvenile
ENSMZEG00005008130	2.72808	6.92942	9.48336e-06	0.00240316	112	Victoria_Juvenile
ENSMZEG00005026067	3.45518	4.16749	9.48771e-06	0.00240316	113	Victoria_Juvenile
ENSMZEG00005011450	6.03265	-3.99414	9.75646e-06	0.00244956	114	Victoria_Juvenile
ENSMZEG00005009945	6.05364	2.35595	1.00821e-05	0.0025093	115	Victoria_Juvenile
ENSMZEG00005020081	8.93906	2.13847	1.08864e-05	0.00268614	116	Victoria_Juvenile
ENSMZEG00005012531	4.01709	-4.79044	1.11851e-05	0.00273623	117	Victoria_Juvenile
ENSMZEG00005006575	5.66043	2.80839	1.13289e-05	0.00274793	118	Victoria_Juvenile
ENSMZEG00005015744	6.75909	-2.52813	1.14281e-05	0.0027487	119	Victoria_Juvenile
ENSMZEG00005022358	8.33371	-1.66897	1.16198e-05	0.00277151	120	Victoria_Juvenile
ENSMZEG00005021468	6.77008	-6.50053	1.17326e-05	0.00277529	121	Victoria_Juvenile
ENSMZEG00005008329	-7.8522	11.9597	1.18671e-05	0.0027841	122	Victoria_Juvenile
ENSMZEG00005028395	8.96895	1.86094	1.21931e-05	0.00283114	123	Victoria_Juvenile
ENSMZEG00005012717	7.74449	-1.85768	1.23562e-05	0.00283114	124	Victoria_Juvenile
ENSMZEG00005025590	6.29652	2.3353	1.23643e-05	0.00283114	125	Victoria_Juvenile
ENSMZEG00005008016	3.58285	-5.28268	1.29289e-05	0.00290875	126	Victoria_Juvenile
ENSMZEG00005025238	-7.8522	12.2031	1.29968e-05	0.00290875	127	Victoria_Juvenile
ENSMZEG00005000970	4.73546	-3.17492	1.30082e-05	0.00290875	128	Victoria_Juvenile
ENSMZEG00005028051	5.95615	3.111	1.31899e-05	0.00292653	129	Victoria_Juvenile
ENSMZEG00005026592	7.52091	-1.68348	1.38678e-05	0.00303152	130	Victoria_Juvenile
ENSMZEG00005004575	5.55125	-2.51184	1.38749e-05	0.00303152	131	Victoria_Juvenile
ENSMZEG00005027034	9.77421	-2.80885	1.44839e-05	0.00314059	132	Victoria_Juvenile
ENSMZEG00005007570	4.49031	3.13733	1.49709e-05	0.00319277	133	Victoria_Juvenile
ENSMZEG00005000681	2.08997	6.5344	1.49726e-05	0.00319277	134	Victoria_Juvenile
ENSMZEG00005011223	10.4781	-2.03132	1.50592e-05	0.00319277	135	Victoria_Juvenile
ENSMZEG00005000116	3.43758	5.27383	1.62394e-05	0.00341768	136	Victoria_Juvenile
ENSMZEG00005018236	5.88768	-3.27535	1.69103e-05	0.0035329	137	Victoria_Juvenile
ENSMZEG00005001683	8.48038	-1.59519	1.74345e-05	0.00361137	138	Victoria_Juvenile
ENSMZEG00005003961	4.77375	-3.71149	1.75382e-05	0.00361137	139	Victoria_Juvenile
ENSMZEG00005004090	3.85397	-5.86507	1.78683e-05	0.00365305	140	Victoria_Juvenile
ENSMZEG00005006712	6.35734	-6.31741	1.81846e-05	0.00369135	141	Victoria_Juvenile
ENSMZEG00005004424	5.05605	3.31053	1.95884e-05	0.00392018	142	Victoria_Juvenile
ENSMZEG00005022233	7.97096	-6.00408	1.96888e-05	0.00392018	143	Victoria_Juvenile
ENSMZEG00005001823	4.46834	3.07861	1.97228e-05	0.00392018	144	Victoria_Juvenile
ENSMZEG00005006652	1.67064	-6.66833	2.10621e-05	0.00415751	145	Victoria_Juvenile
ENSMZEG00005016562	1.6295	6.73227	2.21087e-05	0.00432156	146	Victoria_Juvenile
ENSMZEG00005011433	7.08926	-2.47042	2.21951e-05	0.00432156	147	Victoria_Juvenile
ENSMZEG00005013419	11.2591	1.48815	2.33033e-05	0.00450667	148	Victoria_Juvenile
ENSMZEG00005004523	3.56842	-4.7807	2.48718e-05	0.00477771	149	Victoria_Juvenile
ENSMZEG00005010617	7.14127	3.22179	2.55145e-05	0.00486851	150	Victoria_Juvenile
ENSMZEG00005009362	3.82248	3.99105	2.56885e-05	0.00486925	151	Victoria_Juvenile
ENSMZEG00005018561	3.85827	-3.57834	2.6347e-05	0.00496121	152	Victoria_Juvenile
ENSMZEG00005018960	5.51472	3.08712	2.68053e-05	0.00501451	153	Victoria_Juvenile
ENSMZEG00005016145	6.75024	-2.23439	2.70136e-05	0.00502068	154	Victoria_Juvenile
ENSMZEG00005004283	8.15064	1.60679	2.75101e-05	0.00506869	155	Victoria_Juvenile
ENSMZEG00005024892	5.49755	-3.30275	2.76262e-05	0.00506869	156	Victoria_Juvenile
ENSMZEG00005010906	7.17269	1.88813	2.80685e-05	0.00511705	157	Victoria_Juvenile
ENSMZEG00005008451	8.57495	-1.75366	2.83696e-05	0.00513921	158	Victoria_Juvenile
ENSMZEG00005007824	7.34082	-1.86217	2.8664e-05	0.00514871	159	Victoria_Juvenile
ENSMZEG00005002625	2.96114	-6.07941	2.87819e-05	0.00514871	160	Victoria_Juvenile
ENSMZEG00005000152	11.1017	-1.68484	3.00169e-05	0.00533629	161	Victoria_Juvenile
ENSMZEG00005024112	2.64436	-5.56525	3.20707e-05	0.00566622	162	Victoria_Juvenile
ENSMZEG00005006237	3.20009	-5.91344	3.23417e-05	0.00567905	163	Victoria_Juvenile
ENSMZEG00005022002	4.15268	-3.12733	3.29145e-05	0.00574438	164	Victoria_Juvenile
ENSMZEG00005021717	9.33746	-1.41342	3.32325e-05	0.00576473	165	Victoria_Juvenile
ENSMZEG00005025849	5.43732	-4.40868	3.38211e-05	0.00583149	166	Victoria_Juvenile
ENSMZEG00005025987	3.94387	4.3127	3.42073e-05	0.00586276	167	Victoria_Juvenile
ENSMZEG00005011989	6.68524	-2.03854	3.52917e-05	0.00601221	168	Victoria_Juvenile
ENSMZEG00005014948	5.19049	-2.35226	3.55845e-05	0.00601221	169	Victoria_Juvenile
ENSMZEG00005005597	5.81888	-2.37462	3.57094e-05	0.00601221	170	Victoria_Juvenile
ENSMZEG00005009019	8.46117	-1.45699	3.6288e-05	0.00607389	171	Victoria_Juvenile
ENSMZEG00005013682	6.67676	-1.91137	3.71593e-05	0.00618357	172	Victoria_Juvenile
ENSMZEG00005008694	4.81305	-3.29906	3.77835e-05	0.00625109	173	Victoria_Juvenile
ENSMZEG00005006988	8.91279	-1.33172	3.81314e-05	0.0062724	174	Victoria_Juvenile
ENSMZEG00005020801	2.88135	5.70277	3.97834e-05	0.00650674	175	Victoria_Juvenile
ENSMZEG00005027245	-7.8522	-12.1267	4.29081e-05	0.00697793	176	Victoria_Juvenile
ENSMZEG00005022538	-7.8522	12.2988	4.33212e-05	0.0070053	177	Victoria_Juvenile
ENSMZEG00005027217	5.322	2.78628	4.36839e-05	0.00702427	178	Victoria_Juvenile
ENSMZEG00005019909	8.79119	1.39685	4.41156e-05	0.00703681	179	Victoria_Juvenile
ENSMZEG00005004133	-7.8522	-12.5244	4.42536e-05	0.00703681	180	Victoria_Juvenile
ENSMZEG00005013848	5.76467	2.98546	4.49057e-05	0.00709865	181	Victoria_Juvenile
ENSMZEG00005018890	8.46714	1.82789	4.51385e-05	0.00709865	182	Victoria_Juvenile
ENSMZEG00005027371	4.11909	2.9576	4.65217e-05	0.0072762	183	Victoria_Juvenile
ENSMZEG00005004397	8.0924	-6.20439	4.70627e-05	0.00732081	184	Victoria_Juvenile
ENSMZEG00005020545	5.9448	2.06945	4.73941e-05	0.00733251	185	Victoria_Juvenile
ENSMZEG00005023949	3.07123	-4.9501	4.84193e-05	0.00745084	186	Victoria_Juvenile
ENSMZEG00005028210	2.43836	-6.43982	4.90411e-05	0.00750618	187	Victoria_Juvenile
ENSMZEG00005026758	5.55706	2.16328	5.10972e-05	0.00777928	188	Victoria_Juvenile
ENSMZEG00005025794	2.59952	-5.19883	5.15513e-05	0.00780689	189	Victoria_Juvenile
ENSMZEG00005007807	-7.8522	11.316	5.23969e-05	0.00785013	190	Victoria_Juvenile
ENSMZEG00005006466	2.56435	5.06877	5.25189e-05	0.00785013	191	Victoria_Juvenile
ENSMZEG00005028349	8.16617	-1.4371	5.26597e-05	0.00785013	192	Victoria_Juvenile
ENSMZEG00005010977	9.14723	1.65563	5.48258e-05	0.00809681	193	Victoria_Juvenile
ENSMZEG00005015124	3.90042	4.51639	5.49143e-05	0.00809681	194	Victoria_Juvenile
ENSMZEG00005013211	-7.8522	13.8162	5.51631e-05	0.00809681	195	Victoria_Juvenile
ENSMZEG00005027924	-7.8522	11.2896	5.594e-05	0.00815822	196	Victoria_Juvenile
ENSMZEG00005007041	7.27526	-1.78482	5.62408e-05	0.00815822	197	Victoria_Juvenile
ENSMZEG00005001414	8.88041	-1.84824	5.64366e-05	0.00815822	198	Victoria_Juvenile
ENSMZEG00005019919	7.39936	1.7835	5.81736e-05	0.0083081	199	Victoria_Juvenile
ENSMZEG00005002717	4.41259	5.18325	5.82498e-05	0.0083081	200	Victoria_Juvenile
ENSMZEG00005022596	10.6376	-1.53467	5.83442e-05	0.0083081	201	Victoria_Juvenile
ENSMZEG00005008645	8.093	-1.39985	5.95266e-05	0.00843451	202	Victoria_Juvenile
ENSMZEG00005005349	6.10026	2.76111	6.03979e-05	0.0085158	203	Victoria_Juvenile
ENSMZEG00005014589	7.40565	-1.61373	6.08165e-05	0.00853279	204	Victoria_Juvenile
ENSMZEG00005006673	5.27408	-3.09565	6.14886e-05	0.00858501	205	Victoria_Juvenile
ENSMZEG00005000413	8.76317	-1.59632	6.26232e-05	0.00870098	206	Victoria_Juvenile
ENSMZEG00005020862	11.0942	-1.3997	6.39986e-05	0.00884912	207	Victoria_Juvenile
ENSMZEG00005004074	12.1617	-2.4957	6.5806e-05	0.0089886	208	Victoria_Juvenile
ENSMZEG00005007860	1.64483	6.23385	6.583e-05	0.0089886	209	Victoria_Juvenile
ENSMZEG00005001401	8.99836	-1.43365	6.59495e-05	0.0089886	210	Victoria_Juvenile
ENSMZEG00005006715	7.08482	-1.79188	6.69432e-05	0.00908079	211	Victoria_Juvenile
ENSMZEG00005019288	5.48934	-3.80636	6.77336e-05	0.00914467	212	Victoria_Juvenile
ENSMZEG00005024498	6.87377	-2.86079	6.93508e-05	0.00928321	213	Victoria_Juvenile
ENSMZEG00005009090	3.38941	3.45346	6.94084e-05	0.00928321	214	Victoria_Juvenile
ENSMZEG00005008359	7.48856	-1.71842	6.97997e-05	0.00929213	215	Victoria_Juvenile
ENSMZEG00005015218	11.8733	3.67522	7.07916e-05	0.00933702	216	Victoria_Juvenile
ENSMZEG00005011727	8.93926	1.52175	7.08592e-05	0.00933702	217	Victoria_Juvenile
ENSMZEG00005012281	1.50589	-6.6606	7.11156e-05	0.00933702	218	Victoria_Juvenile
ENSMZEG00005017624	7.05286	-1.69311	7.19773e-05	0.00940701	219	Victoria_Juvenile
ENSMZEG00005003194	6.1729	3.70435	7.34749e-05	0.00955908	220	Victoria_Juvenile
ENSMZEG00005026227	8.95209	-1.56379	7.45803e-05	0.00965899	221	Victoria_Juvenile
ENSMZEG00005002893	2.32519	5.84699	7.60698e-05	0.00980752	222	Victoria_Juvenile
ENSMZEG00005002641	10.3996	1.85042	7.64349e-05	0.00981041	223	Victoria_Juvenile
ENSMZEG00005013698	3.21217	3.38627	7.77036e-05	0.00992871	224	Victoria_Juvenile
ENSMZEG00005013530	7.42456	2.24438	7.86472e-05	0.0100046	225	Victoria_Juvenile
ENSMZEG00005008014	8.04283	1.47	8.06616e-05	0.0102155	226	Victoria_Juvenile
ENSMZEG00005027771	-7.8522	-11.4919	8.19692e-05	0.0103144	227	Victoria_Juvenile
ENSMZEG00005012907	6.04341	2.44367	8.24807e-05	0.0103144	228	Victoria_Juvenile
ENSMZEG00005014073	6.4701	-1.67862	8.25237e-05	0.0103144	229	Victoria_Juvenile
ENSMZEG00005009683	3.89241	4.12642	8.31726e-05	0.0103503	230	Victoria_Juvenile
ENSMZEG00005001984	5.83168	4.91642	8.439e-05	0.0104315	231	Victoria_Juvenile
ENSMZEG00005016820	10.474	-1.40128	8.45545e-05	0.0104315	232	Victoria_Juvenile
ENSMZEG00005024698	5.02369	-2.52515	8.58469e-05	0.0105455	233	Victoria_Juvenile
ENSMZEG00005027242	8.47516	1.23667	8.8695e-05	0.0108488	234	Victoria_Juvenile
ENSMZEG00005009051	11.7883	-1.30792	8.98608e-05	0.0109447	235	Victoria_Juvenile
ENSMZEG00005021741	9.35842	-1.53343	9.058e-05	0.0109853	236	Victoria_Juvenile
ENSMZEG00005027776	1.37242	6.2181	9.09623e-05	0.0109853	237	Victoria_Juvenile
ENSMZEG00005019688	-7.8522	-11.1795	9.15289e-05	0.0110073	238	Victoria_Juvenile
ENSMZEG00005010176	4.9632	-2.66287	9.22554e-05	0.0110483	239	Victoria_Juvenile
ENSMZEG00005002931	11.6478	1.26325	9.28916e-05	0.0110781	240	Victoria_Juvenile
ENSMZEG00005019291	4.93341	-2.65834	9.5634e-05	0.0112558	241	Victoria_Juvenile
ENSMZEG00005017351	9.01524	-1.25531	9.56662e-05	0.0112558	242	Victoria_Juvenile
ENSMZEG00005021972	7.15416	1.61304	9.59016e-05	0.0112558	243	Victoria_Juvenile
ENSMZEG00005011199	6.93491	1.79946	9.61776e-05	0.0112558	244	Victoria_Juvenile
ENSMZEG00005020870	6.53271	-2.03847	9.66465e-05	0.0112558	245	Victoria_Juvenile
ENSMZEG00005022519	3.59556	-3.53942	9.6741e-05	0.0112558	246	Victoria_Juvenile
ENSMZEG00005001304	1.254	-5.83505	9.76998e-05	0.0113213	247	Victoria_Juvenile
ENSMZEG00005010462	6.42231	-1.76961	9.9138e-05	0.0114416	248	Victoria_Juvenile
ENSMZEG00005006476	7.78529	2.21763	9.96781e-05	0.0114578	249	Victoria_Juvenile
ENSMZEG00005015701	2.96241	4.95942	0.000100603	0.0115003	250	Victoria_Juvenile
ENSMZEG00005008977	8.10133	-1.29907	0.000101197	0.0115003	251	Victoria_Juvenile
ENSMZEG00005019732	4.12123	2.78926	0.000101253	0.0115003	252	Victoria_Juvenile
ENSMZEG00005024396	11.5812	-1.78402	0.00010368	0.0117087	253	Victoria_Juvenile
ENSMZEG00005024251	6.86173	-2.17732	0.000104452	0.0117087	254	Victoria_Juvenile
ENSMZEG00005026958	10.5019	-1.64143	0.000104721	0.0117087	255	Victoria_Juvenile
ENSMZEG00005022455	-7.8522	11.2146	0.000104724	0.0117087	256	Victoria_Juvenile
ENSMZEG00005000826	2.01556	-5.14188	0.000106565	0.0118681	257	Victoria_Juvenile
ENSMZEG00005012491	8.27478	-1.35035	0.00010713	0.0118848	258	Victoria_Juvenile
ENSMZEG00005008462	12.0677	-1.24474	0.000109339	0.0120712	259	Victoria_Juvenile
ENSMZEG00005007905	4.67426	4.15568	0.000109654	0.0120712	260	Victoria_Juvenile
ENSMZEG00005026088	7.14426	1.86023	0.000110216	0.0120866	261	Victoria_Juvenile
ENSMZEG00005023940	1.36364	-5.82143	0.000113106	0.0123561	262	Victoria_Juvenile
ENSMZEG00005021016	7.24546	1.74856	0.00011438	0.0124478	263	Victoria_Juvenile
ENSMZEG00005027283	2.03662	4.70753	0.000114872	0.0124541	264	Victoria_Juvenile
ENSMZEG00005019223	8.68765	-1.24535	0.000117434	0.0126838	265	Victoria_Juvenile
ENSMZEG00005015857	8.78581	-1.277	0.000118623	0.012764	266	Victoria_Juvenile
ENSMZEG00005014391	10.7317	-1.50466	0.000119321	0.0127911	267	Victoria_Juvenile
ENSMZEG00005019233	4.38486	2.41022	0.000121409	0.0129663	268	Victoria_Juvenile
ENSMZEG00005020052	5.75777	2.13888	0.000124955	0.0132954	269	Victoria_Juvenile
ENSMZEG00005000457	6.23502	-1.9875	0.000125709	0.0133261	270	Victoria_Juvenile
ENSMZEG00005011463	3.98038	-3.39832	0.000126613	0.0133605	271	Victoria_Juvenile
ENSMZEG00005006589	5.84741	2.35969	0.000126967	0.0133605	272	Victoria_Juvenile
ENSMZEG00005013168	2.81189	4.3687	0.000128618	0.0134736	273	Victoria_Juvenile
ENSMZEG00005018137	7.64708	-2.74604	0.000128984	0.0134736	274	Victoria_Juvenile
ENSMZEG00005027306	5.85507	2.04275	0.000130018	0.0134859	275	Victoria_Juvenile
ENSMZEG00005020373	8.57707	1.36658	0.000130337	0.0134859	276	Victoria_Juvenile
ENSMZEG00005007230	11.4262	-1.42543	0.000131022	0.0134859	277	Victoria_Juvenile
ENSMZEG00005027728	-7.8522	12.0884	0.000131413	0.0134859	278	Victoria_Juvenile
ENSMZEG00005013483	6.84691	1.61981	0.000131457	0.0134859	279	Victoria_Juvenile
ENSMZEG00005013350	5.71951	2.25519	0.000134818	0.0137813	280	Victoria_Juvenile
ENSMZEG00005007808	9.73991	1.60075	0.000145091	0.0147787	281	Victoria_Juvenile
ENSMZEG00005027595	8.46956	-1.2136	0.000145861	0.0148044	282	Victoria_Juvenile
ENSMZEG00005024226	4.07668	3.74632	0.000147946	0.0149629	283	Victoria_Juvenile
ENSMZEG00005006484	2.68821	-3.60583	0.000148915	0.0150079	284	Victoria_Juvenile
ENSMZEG00005018255	7.19537	-1.61186	0.000151021	0.0151515	285	Victoria_Juvenile
ENSMZEG00005004614	6.88225	2.35018	0.000151639	0.0151515	286	Victoria_Juvenile
ENSMZEG00005017335	7.30311	1.91554	0.000151928	0.0151515	287	Victoria_Juvenile
ENSMZEG00005016991	8.792	2.07494	0.000154964	0.0153611	288	Victoria_Juvenile
ENSMZEG00005024382	15.7503	-1.69524	0.000155103	0.0153611	289	Victoria_Juvenile
ENSMZEG00005008727	5.75283	3.0995	0.000164395	0.0162252	290	Victoria_Juvenile
ENSMZEG00005001644	8.8999	-1.44059	0.000165255	0.016254	291	Victoria_Juvenile
ENSMZEG00005000176	6.97314	-1.85299	0.000166395	0.0163102	292	Victoria_Juvenile
ENSMZEG00005019383	2.26982	-5.63379	0.000169021	0.016511	293	Victoria_Juvenile
ENSMZEG00005025006	-7.8522	-11.4116	0.000176864	0.0172183	294	Victoria_Juvenile
ENSMZEG00005004473	8.32045	-1.34383	0.000182417	0.0176988	295	Victoria_Juvenile
ENSMZEG00005008884	9.20272	1.26608	0.000185342	0.0178384	296	Victoria_Juvenile
ENSMZEG00005025957	5.59631	-3.7567	0.000185785	0.0178384	297	Victoria_Juvenile
ENSMZEG00005008525	5.8694	-1.90174	0.000186208	0.0178384	298	Victoria_Juvenile
ENSMZEG00005016279	9.28462	1.56259	0.000186766	0.0178384	299	Victoria_Juvenile
ENSMZEG00005001406	2.35218	-4.8822	0.000186973	0.0178384	300	Victoria_Juvenile
ENSMZEG00005011408	6.16962	-3.45564	0.000188603	0.0178943	301	Victoria_Juvenile
ENSMZEG00005023765	8.2852	-1.42141	0.000188808	0.0178943	302	Victoria_Juvenile
ENSMZEG00005002497	5.44222	-1.83686	0.000195119	0.0184314	303	Victoria_Juvenile
ENSMZEG00005015272	7.32967	2.13481	0.000196802	0.0184832	304	Victoria_Juvenile
ENSMZEG00005025381	6.32346	1.95138	0.00019696	0.0184832	305	Victoria_Juvenile
ENSMZEG00005002013	5.77422	-1.84338	0.000200866	0.0187511	306	Victoria_Juvenile
ENSMZEG00005000110	2.72286	-3.53317	0.000201125	0.0187511	307	Victoria_Juvenile
ENSMZEG00005024130	3.87486	3.56797	0.000206071	0.0191499	308	Victoria_Juvenile
ENSMZEG00005004773	8.6331	-1.46317	0.000206798	0.0191553	309	Victoria_Juvenile
ENSMZEG00005025052	5.22193	3.72441	0.000208036	0.0192078	310	Victoria_Juvenile
ENSMZEG00005003729	10.7678	1.19188	0.000208994	0.0192196	311	Victoria_Juvenile
ENSMZEG00005027345	11.7153	-1.63472	0.000209507	0.0192196	312	Victoria_Juvenile
ENSMZEG00005006050	4.47765	3.62766	0.000211533	0.0192487	313	Victoria_Juvenile
ENSMZEG00005007301	6.02665	-1.59267	0.000211754	0.0192487	314	Victoria_Juvenile
ENSMZEG00005025949	4.98866	2.79462	0.000211842	0.0192487	315	Victoria_Juvenile
ENSMZEG00005024875	3.16052	3.19107	0.000212562	0.019253	316	Victoria_Juvenile
ENSMZEG00005018033	-7.8522	-10.8559	0.00021385	0.0192566	317	Victoria_Juvenile
ENSMZEG00005009277	1.40675	5.75768	0.000214171	0.0192566	318	Victoria_Juvenile
ENSMZEG00005024657	3.39218	6.55861	0.00021462	0.0192566	319	Victoria_Juvenile
ENSMZEG00005011695	4.3168	-2.71494	0.000220216	0.0196969	320	Victoria_Juvenile
ENSMZEG00005004228	3.99318	3.04365	0.000222668	0.0198224	321	Victoria_Juvenile
ENSMZEG00005019457	7.83117	-1.41798	0.000224439	0.0198224	322	Victoria_Juvenile
ENSMZEG00005027852	7.36643	1.57893	0.000224612	0.0198224	323	Victoria_Juvenile
ENSMZEG00005002258	5.79559	-3.27629	0.00022498	0.0198224	324	Victoria_Juvenile
ENSMZEG00005020332	2.48948	4.91902	0.000225081	0.0198224	325	Victoria_Juvenile
ENSMZEG00005018305	5.70576	1.97225	0.000230343	0.0202236	326	Victoria_Juvenile
ENSMZEG00005021079	7.95898	1.25783	0.00023254	0.020354	327	Victoria_Juvenile
ENSMZEG00005003137	7.8764	-1.73236	0.000235085	0.0205013	328	Victoria_Juvenile
ENSMZEG00005020929	5.93165	3.11965	0.000236304	0.0205013	329	Victoria_Juvenile
ENSMZEG00005002539	9.8632	1.03224	0.000236371	0.0205013	330	Victoria_Juvenile
ENSMZEG00005025734	7.74548	-3.47759	0.000239734	0.0207301	331	Victoria_Juvenile
ENSMZEG00005013943	9.13431	-1.04209	0.000241655	0.0208333	332	Victoria_Juvenile
ENSMZEG00005025956	1.83805	-5.00314	0.0002433	0.0209121	333	Victoria_Juvenile
ENSMZEG00005011860	8.06556	-1.55773	0.000245101	0.0210038	334	Victoria_Juvenile
ENSMZEG00005021242	2.32595	4.76789	0.000247042	0.0211001	335	Victoria_Juvenile
ENSMZEG00005014367	4.42746	2.31511	0.000247698	0.0211001	336	Victoria_Juvenile
ENSMZEG00005016841	7.2302	2.27	0.000250878	0.0212804	337	Victoria_Juvenile
ENSMZEG00005001718	-7.8522	11.1089	0.000251975	0.0212804	338	Victoria_Juvenile
ENSMZEG00005019250	3.78728	-3.3832	0.000252368	0.0212804	339	Victoria_Juvenile
ENSMZEG00005006319	7.9724	1.65396	0.000253163	0.0212804	340	Victoria_Juvenile
ENSMZEG00005019551	5.57168	4.46728	0.000253532	0.0212804	341	Victoria_Juvenile
ENSMZEG00005014569	4.95136	2.45593	0.000257874	0.0214763	342	Victoria_Juvenile
ENSMZEG00005013026	7.93965	1.69054	0.000257987	0.0214763	343	Victoria_Juvenile
ENSMZEG00005008309	7.97349	1.13547	0.000258118	0.0214763	344	Victoria_Juvenile
ENSMZEG00005025531	-7.8522	11.3753	0.00025975	0.0214941	345	Victoria_Juvenile
ENSMZEG00005010248	4.93587	-2.36517	0.000259834	0.0214941	346	Victoria_Juvenile
ENSMZEG00005005612	7.61598	1.33738	0.00026297	0.0216661	347	Victoria_Juvenile
ENSMZEG00005026805	2.00618	5.35503	0.000263882	0.0216661	348	Victoria_Juvenile
ENSMZEG00005024171	-7.8522	12.5475	0.000264904	0.0216661	349	Victoria_Juvenile
ENSMZEG00005002162	6.7275	-3.80551	0.000265408	0.0216661	350	Victoria_Juvenile
ENSMZEG00005005677	7.32427	2.47464	0.000265698	0.0216661	351	Victoria_Juvenile
ENSMZEG00005015561	3.17453	-3.28961	0.000268229	0.0218104	352	Victoria_Juvenile
ENSMZEG00005028412	5.61003	2.88816	0.000269872	0.0218818	353	Victoria_Juvenile
ENSMZEG00005011985	7.41398	1.37655	0.00027101	0.021897	354	Victoria_Juvenile
ENSMZEG00005000455	5.95381	1.95982	0.000271691	0.021897	355	Victoria_Juvenile
ENSMZEG00005020544	1.27682	6.0269	0.000272568	0.021897	356	Victoria_Juvenile
ENSMZEG00005003833	7.20977	-1.25197	0.00027312	0.021897	357	Victoria_Juvenile
ENSMZEG00005005285	8.66375	1.20748	0.000274735	0.021965	358	Victoria_Juvenile
ENSMZEG00005026780	3.4676	-3.02266	0.000275625	0.0219748	359	Victoria_Juvenile
ENSMZEG00005000602	4.05748	-4.3092	0.000277206	0.0219976	360	Victoria_Juvenile
ENSMZEG00005016644	11.0181	2.56079	0.000277448	0.0219976	361	Victoria_Juvenile
ENSMZEG00005010305	9.70262	1.75421	0.000278673	0.0220336	362	Victoria_Juvenile
ENSMZEG00005017467	9.27316	1.06336	0.000282011	0.0222362	363	Victoria_Juvenile
ENSMZEG00005011787	13.9303	-1.77256	0.00028342	0.0222858	364	Victoria_Juvenile
ENSMZEG00005009919	4.81755	-2.12924	0.000284719	0.0223267	365	Victoria_Juvenile
ENSMZEG00005027701	-7.8522	-11.2486	0.00028595	0.0223619	366	Victoria_Juvenile
ENSMZEG00005009901	2.96972	-3.3344	0.000289132	0.0224582	367	Victoria_Juvenile
ENSMZEG00005015415	8.41102	-1.88395	0.000289176	0.0224582	368	Victoria_Juvenile
ENSMZEG00005011744	5.66917	-3.49782	0.000289535	0.0224582	369	Victoria_Juvenile
ENSMZEG00005014488	5.48956	-1.79879	0.00029631	0.0228988	370	Victoria_Juvenile
ENSMZEG00005008593	8.63493	-1.34798	0.000296815	0.0228988	371	Victoria_Juvenile
ENSMZEG00005024094	10.2872	-1.32813	0.000299455	0.0230403	372	Victoria_Juvenile
ENSMZEG00005027035	4.32454	-2.631	0.000301691	0.0231501	373	Victoria_Juvenile
ENSMZEG00005017900	8.26935	2.57516	0.000304141	0.0232244	374	Victoria_Juvenile
ENSMZEG00005023595	5.24305	2.86608	0.000304282	0.0232244	375	Victoria_Juvenile
ENSMZEG00005001938	-7.8522	11.0175	0.000305524	0.0232572	376	Victoria_Juvenile
ENSMZEG00005025368	7.174	-1.52041	0.000306752	0.0232887	377	Victoria_Juvenile
ENSMZEG00005018452	7.6704	-1.65418	0.000308673	0.0233371	378	Victoria_Juvenile
ENSMZEG00005028391	3.06987	-4.23744	0.000309019	0.0233371	379	Victoria_Juvenile
ENSMZEG00005010685	9.39428	1.26408	0.000310527	0.0233892	380	Victoria_Juvenile
ENSMZEG00005022738	4.73056	-2.10178	0.000314004	0.023589	381	Victoria_Juvenile
ENSMZEG00005003105	9.06527	1.05782	0.000316285	0.0236982	382	Victoria_Juvenile
ENSMZEG00005003671	10.0136	0.994164	0.0003354	0.0250648	383	Victoria_Juvenile
ENSMZEG00005006725	7.0385	-1.84708	0.000341047	0.0253755	384	Victoria_Juvenile
ENSMZEG00005025542	3.79367	3.26954	0.000342903	0.0253755	385	Victoria_Juvenile
ENSMZEG00005013721	2.75843	5.17635	0.000343096	0.0253755	386	Victoria_Juvenile
ENSMZEG00005015337	1.03096	-5.38896	0.000343398	0.0253755	387	Victoria_Juvenile
ENSMZEG00005001249	6.6501	1.58726	0.00034399	0.0253755	388	Victoria_Juvenile
ENSMZEG00005022127	3.52924	-2.52171	0.000345152	0.0253957	389	Victoria_Juvenile
ENSMZEG00005009300	8.80165	-1.20165	0.00035147	0.0257389	390	Victoria_Juvenile
ENSMZEG00005016913	7.08063	-1.36058	0.000351615	0.0257389	391	Victoria_Juvenile
ENSMZEG00005026777	7.7298	2.03228	0.000354249	0.0258515	392	Victoria_Juvenile
ENSMZEG00005014005	1.7515	4.97626	0.000357328	0.0258515	393	Victoria_Juvenile
ENSMZEG00005001682	4.98175	2.75254	0.000358135	0.0258515	394	Victoria_Juvenile
ENSMZEG00005001487	-7.8522	-10.5328	0.000359129	0.0258515	395	Victoria_Juvenile
ENSMZEG00005027581	6.75591	-2.12278	0.000361233	0.0258515	396	Victoria_Juvenile
ENSMZEG00005020398	7.30795	1.35977	0.000362305	0.0258515	397	Victoria_Juvenile
ENSMZEG00005016528	3.75601	2.64617	0.00036285	0.0258515	398	Victoria_Juvenile
ENSMZEG00005015896	9.5256	-1.22347	0.000363642	0.0258515	399	Victoria_Juvenile
ENSMZEG00005007894	4.42302	2.80555	0.000363962	0.0258515	400	Victoria_Juvenile
ENSMZEG00005004358	6.88084	-1.52817	0.000364011	0.0258515	401	Victoria_Juvenile
ENSMZEG00005001521	8.19036	2.14779	0.000364422	0.0258515	402	Victoria_Juvenile
ENSMZEG00005018543	8.85098	1.16138	0.000365066	0.0258515	403	Victoria_Juvenile
ENSMZEG00005015023	4.79099	-1.96377	0.000365068	0.0258515	404	Victoria_Juvenile
ENSMZEG00005022398	4.95699	2.52808	0.000365797	0.0258515	405	Victoria_Juvenile
ENSMZEG00005000489	1.81767	4.4953	0.000368616	0.0259622	406	Victoria_Juvenile
ENSMZEG00005000883	4.14907	-2.6425	0.000369177	0.0259622	407	Victoria_Juvenile
ENSMZEG00005000436	10.5762	-1.43328	0.000373451	0.0261983	408	Victoria_Juvenile
ENSMZEG00005021530	2.91877	-3.25769	0.00037453	0.0262098	409	Victoria_Juvenile
ENSMZEG00005012932	-7.8522	10.7643	0.00037709	0.0262661	410	Victoria_Juvenile
ENSMZEG00005026973	10.1516	-1.75038	0.00037717	0.0262661	411	Victoria_Juvenile
ENSMZEG00005019889	1.48835	5.92089	0.000378513	0.0262956	412	Victoria_Juvenile
ENSMZEG00005007829	3.53297	3.83608	0.000380401	0.0263624	413	Victoria_Juvenile
ENSMZEG00005024445	6.32845	-1.7231	0.000382109	0.0263624	414	Victoria_Juvenile
ENSMZEG00005026717	1.80061	-4.80947	0.000382237	0.0263624	415	Victoria_Juvenile
ENSMZEG00005013584	9.16729	1.20836	0.000383974	0.0264185	416	Victoria_Juvenile
ENSMZEG00005017162	9.39571	1.05764	0.00038637	0.0265196	417	Victoria_Juvenile
ENSMZEG00005021970	11.3934	-1.25894	0.000388236	0.0265839	418	Victoria_Juvenile
ENSMZEG00005000631	6.24049	1.67749	0.000390835	0.0266981	419	Victoria_Juvenile
ENSMZEG00005020077	7.91175	-1.36337	0.000392008	0.0267144	420	Victoria_Juvenile
ENSMZEG00005007994	8.99588	1.60417	0.000395511	0.0268839	421	Victoria_Juvenile
ENSMZEG00005021760	4.97924	2.16311	0.000397103	0.0268839	422	Victoria_Juvenile
ENSMZEG00005018249	8.54389	-1.42219	0.000397749	0.0268839	423	Victoria_Juvenile
ENSMZEG00005023389	1.27241	5.26694	0.000398252	0.0268839	424	Victoria_Juvenile
ENSMZEG00005011079	5.20278	-2.25145	0.000410231	0.0276274	425	Victoria_Juvenile
ENSMZEG00005019442	4.5538	-2.11884	0.000413326	0.0277193	426	Victoria_Juvenile
ENSMZEG00005003734	8.07584	-1.29337	0.000413533	0.0277193	427	Victoria_Juvenile
ENSMZEG00005012019	8.03287	1.12516	0.000416404	0.0277978	428	Victoria_Juvenile
ENSMZEG00005024709	2.93835	-5.20375	0.000416647	0.0277978	429	Victoria_Juvenile
ENSMZEG00005018756	6.68186	-1.72927	0.000420866	0.0279828	430	Victoria_Juvenile
ENSMZEG00005000026	4.5117	2.45291	0.000421375	0.0279828	431	Victoria_Juvenile
ENSMZEG00005012939	8.99342	-0.967531	0.000425867	0.0281846	432	Victoria_Juvenile
ENSMZEG00005007527	4.68027	2.19522	0.000427115	0.0281846	433	Victoria_Juvenile
ENSMZEG00005028389	5.14524	-2.99321	0.000427367	0.0281846	434	Victoria_Juvenile
ENSMZEG00005003452	6.71816	-1.991	0.000430197	0.028306	435	Victoria_Juvenile
ENSMZEG00005012637	7.99859	-1.25381	0.000440753	0.028934	436	Victoria_Juvenile
ENSMZEG00005021811	4.37558	2.42502	0.000442937	0.0290108	437	Victoria_Juvenile
ENSMZEG00005011416	6.46461	-1.57952	0.000451193	0.0294841	438	Victoria_Juvenile
ENSMZEG00005014807	8.94662	-1.29535	0.000457209	0.0298092	439	Victoria_Juvenile
ENSMZEG00005021948	8.97302	1.0017	0.000459078	0.029863	440	Victoria_Juvenile
ENSMZEG00005014188	-7.8522	-10.7765	0.000465113	0.030187	441	Victoria_Juvenile
ENSMZEG00005012171	8.21748	-1.25064	0.000467092	0.0302469	442	Victoria_Juvenile
ENSMZEG00005003962	5.36595	2.09808	0.000474863	0.0306807	443	Victoria_Juvenile
ENSMZEG00005008644	8.65547	-1.01546	0.000477899	0.0308073	444	Victoria_Juvenile
ENSMZEG00005005987	7.04252	-1.27351	0.000489918	0.0315111	445	Victoria_Juvenile
ENSMZEG00005022938	5.2721	-2.20106	0.000497197	0.0318982	446	Victoria_Juvenile
ENSMZEG00005023862	0.880829	-5.41049	0.000499035	0.0318982	447	Victoria_Juvenile
ENSMZEG00005024952	-7.8522	-10.3356	0.000499279	0.0318982	448	Victoria_Juvenile
ENSMZEG00005023370	6.72153	-1.72758	0.000501511	0.0319369	449	Victoria_Juvenile
ENSMZEG00005003316	1.12635	5.1969	0.000502471	0.0319369	450	Victoria_Juvenile
ENSMZEG00005024557	5.92211	-1.53452	0.000503233	0.0319369	451	Victoria_Juvenile
ENSMZEG00005017800	2.5858	-3.25905	0.000508767	0.0322167	452	Victoria_Juvenile
ENSMZEG00005006453	8.87854	-1.03923	0.0005123	0.0323687	453	Victoria_Juvenile
ENSMZEG00005020957	7.98844	-1.91706	0.000516827	0.0325828	454	Victoria_Juvenile
ENSMZEG00005022598	3.21218	3.07475	0.000518522	0.0326179	455	Victoria_Juvenile
ENSMZEG00005010976	8.21883	-1.16022	0.000520062	0.032643	456	Victoria_Juvenile
ENSMZEG00005017048	4.30666	-3.03869	0.000522592	0.0327301	457	Victoria_Juvenile
ENSMZEG00005022593	7.94095	-1.6146	0.000529084	0.0330643	458	Victoria_Juvenile
ENSMZEG00005027923	4.74803	2.7417	0.000534079	0.0333037	459	Victoria_Juvenile
ENSMZEG00005023029	3.42472	2.68523	0.000535592	0.0333254	460	Victoria_Juvenile
ENSMZEG00005024667	9.887	-1.13508	0.000538153	0.0334122	461	Victoria_Juvenile
ENSMZEG00005025192	6.84368	-1.39682	0.00056036	0.0346036	462	Victoria_Juvenile
ENSMZEG00005012915	4.78822	2.17009	0.000560572	0.0346036	463	Victoria_Juvenile
ENSMZEG00005009207	6.50645	-1.46336	0.000562115	0.0346036	464	Victoria_Juvenile
ENSMZEG00005026580	10.1658	0.954267	0.000562178	0.0346036	465	Victoria_Juvenile
ENSMZEG00005014585	9.87213	-0.992395	0.000571246	0.0350863	466	Victoria_Juvenile
ENSMZEG00005001752	4.86856	-1.88552	0.000577148	0.0353051	467	Victoria_Juvenile
ENSMZEG00005019142	2.1928	-4.86451	0.000577277	0.0353051	468	Victoria_Juvenile
ENSMZEG00005013477	9.65136	-1.94283	0.000590449	0.0360337	469	Victoria_Juvenile
ENSMZEG00005011035	9.64454	-1.38649	0.000591978	0.0360502	470	Victoria_Juvenile
ENSMZEG00005015168	8.65879	1.61039	0.000598854	0.0363915	471	Victoria_Juvenile
ENSMZEG00005007492	8.71075	-1.22563	0.000602765	0.0365516	472	Victoria_Juvenile
ENSMZEG00005022352	7.01067	1.62809	0.000605462	0.0366375	473	Victoria_Juvenile
ENSMZEG00005023604	7.90599	-1.38388	0.000609611	0.036729	474	Victoria_Juvenile
ENSMZEG00005018802	-7.8522	-10.6162	0.00061051	0.036729	475	Victoria_Juvenile
ENSMZEG00005020563	7.34363	1.75848	0.000610823	0.036729	476	Victoria_Juvenile
ENSMZEG00005006226	8.3563	1.01318	0.000616371	0.0369848	477	Victoria_Juvenile
ENSMZEG00005018105	4.15195	2.36429	0.000630977	0.037782	478	Victoria_Juvenile
ENSMZEG00005000567	5.13201	1.69653	0.000635305	0.0379618	479	Victoria_Juvenile
ENSMZEG00005014694	3.46278	-2.53824	0.000638218	0.0380564	480	Victoria_Juvenile
ENSMZEG00005009867	7.65161	-1.52626	0.000640409	0.0381077	481	Victoria_Juvenile
ENSMZEG00005006522	6.4288	1.6446	0.000642724	0.0381661	482	Victoria_Juvenile
ENSMZEG00005020278	6.28555	-1.49339	0.000646212	0.0382014	483	Victoria_Juvenile
ENSMZEG00005009084	6.09818	3.99197	0.000646823	0.0382014	484	Victoria_Juvenile
ENSMZEG00005013727	7.40377	-1.4545	0.000647322	0.0382014	485	Victoria_Juvenile
ENSMZEG00005011083	12.5136	-1.53995	0.000650629	0.0382329	486	Victoria_Juvenile
ENSMZEG00005028384	-7.8522	10.2807	0.000651878	0.0382329	487	Victoria_Juvenile
ENSMZEG00005013591	7.75587	1.72831	0.00065214	0.0382329	488	Victoria_Juvenile
ENSMZEG00005012888	6.28627	-3.77906	0.0006532	0.0382329	489	Victoria_Juvenile
ENSMZEG00005027586	5.02197	7.89838	0.000656171	0.0383284	490	Victoria_Juvenile
ENSMZEG00005012181	8.47893	-1.09919	0.000657588	0.0383329	491	Victoria_Juvenile
ENSMZEG00005016929	9.38816	0.919715	0.000668576	0.0388351	492	Victoria_Juvenile
ENSMZEG00005005900	6.80979	1.3725	0.00067015	0.0388351	493	Victoria_Juvenile
ENSMZEG00005025082	2.85549	-4.2877	0.000670272	0.0388351	494	Victoria_Juvenile
ENSMZEG00005027927	2.38494	-3.65877	0.00067467	0.0389434	495	Victoria_Juvenile
ENSMZEG00005026378	10.0626	-1.13402	0.000674863	0.0389434	496	Victoria_Juvenile
ENSMZEG00005019447	9.99945	-1.54008	0.000678052	0.0389834	497	Victoria_Juvenile
ENSMZEG00005002444	4.43596	-1.91924	0.00067828	0.0389834	498	Victoria_Juvenile
ENSMZEG00005024885	10.1356	-0.99696	0.000683017	0.039177	499	Victoria_Juvenile
ENSMZEG00005016378	10.0977	-1.22709	0.000686042	0.0392055	500	Victoria_Juvenile
ENSMZEG00005026903	8.90558	-1.10125	0.000686255	0.0392055	501	Victoria_Juvenile
ENSMZEG00005012141	8.39578	-1.38615	0.000689179	0.0392942	502	Victoria_Juvenile
ENSMZEG00005022188	3.71188	6.19414	0.000697327	0.0396797	503	Victoria_Juvenile
ENSMZEG00005009935	-7.8522	10.222	0.00070113	0.039817	504	Victoria_Juvenile
ENSMZEG00005016302	9.88181	1.88234	0.000709336	0.0401375	505	Victoria_Juvenile
ENSMZEG00005002150	3.96176	-2.24907	0.000709579	0.0401375	506	Victoria_Juvenile
ENSMZEG00005014872	9.52061	1.04098	0.000718771	0.0405773	507	Victoria_Juvenile
ENSMZEG00005000373	-7.8522	10.19	0.000726386	0.0409264	508	Victoria_Juvenile
ENSMZEG00005022768	0.991082	5.45543	0.000729299	0.0410098	509	Victoria_Juvenile
ENSMZEG00005023445	-7.8522	10.2781	0.000736734	0.0412706	510	Victoria_Juvenile
ENSMZEG00005018396	4.14898	-2.04385	0.000736867	0.0412706	511	Victoria_Juvenile
ENSMZEG00005026500	3.40364	2.42361	0.000738263	0.0412706	512	Victoria_Juvenile
ENSMZEG00005010049	6.05417	-1.81508	0.000739945	0.041284	513	Victoria_Juvenile
ENSMZEG00005027823	1.58113	4.63553	0.000743959	0.0414273	514	Victoria_Juvenile
ENSMZEG00005026743	9.46334	-0.996965	0.000746912	0.0414553	515	Victoria_Juvenile
ENSMZEG00005026629	4.15288	2.58161	0.000749187	0.0414553	516.5	Victoria_Juvenile
ENSMZEG00005026652	4.15288	2.58161	0.000749187	0.0414553	516.5	Victoria_Juvenile
ENSMZEG00005027753	5.85412	1.67058	0.000750256	0.0414553	518	Victoria_Juvenile
ENSMZEG00005024929	12.5561	-1.1462	0.000753555	0.0415573	519	Victoria_Juvenile
ENSMZEG00005000321	10.5544	0.985114	0.000761252	0.0417648	520	Victoria_Juvenile
ENSMZEG00005020059	-7.8522	10.1509	0.00076261	0.0417648	521	Victoria_Juvenile
ENSMZEG00005026402	8.18372	1.38433	0.000763742	0.0417648	522	Victoria_Juvenile
ENSMZEG00005014642	3.20407	-2.99336	0.000764346	0.0417648	523	Victoria_Juvenile
ENSMZEG00005019943	7.37597	1.21394	0.000764614	0.0417648	524	Victoria_Juvenile
ENSMZEG00005028478	1.79155	5.05637	0.000771607	0.0420665	525	Victoria_Juvenile
ENSMZEG00005006337	10.6609	-0.948913	0.000778278	0.0423103	526	Victoria_Juvenile
ENSMZEG00005008781	7.07344	-1.17088	0.000780437	0.0423103	527	Victoria_Juvenile
ENSMZEG00005002589	5.80986	-1.71983	0.000780513	0.0423103	528	Victoria_Juvenile
ENSMZEG00005006063	6.18542	-1.41356	0.000783822	0.0424094	529	Victoria_Juvenile
ENSMZEG00005003668	7.76631	-1.0582	0.000787642	0.0425357	530	Victoria_Juvenile
ENSMZEG00005017697	4.37227	3.69129	0.00079197	0.0426888	531	Victoria_Juvenile
ENSMZEG00005025990	7.50681	1.20612	0.000794856	0.0427112	532	Victoria_Juvenile
ENSMZEG00005021484	9.17517	1.04292	0.00079537	0.0427112	533	Victoria_Juvenile
ENSMZEG00005016019	3.03837	-2.80938	0.000802129	0.0429935	534	Victoria_Juvenile
ENSMZEG00005017429	6.32856	1.30605	0.000804306	0.0430296	535	Victoria_Juvenile
ENSMZEG00005016635	10.9883	1.33954	0.000806004	0.04304	536	Victoria_Juvenile
ENSMZEG00005012849	6.75327	1.5893	0.000811031	0.0432278	537	Victoria_Juvenile
ENSMZEG00005015296	12.3045	1.02316	0.000819473	0.0435779	538	Victoria_Juvenile
ENSMZEG00005021135	7.9719	-1.01321	0.000820645	0.0435779	539	Victoria_Juvenile
ENSMZEG00005018569	5.00577	-2.50752	0.000824683	0.0437113	540	Victoria_Juvenile
ENSMZEG00005007088	5.45427	-1.78968	0.000827447	0.0437767	541	Victoria_Juvenile
ENSMZEG00005003292	5.40595	-1.99632	0.000831481	0.0438584	542	Victoria_Juvenile
ENSMZEG00005019832	5.83961	1.40794	0.000832057	0.0438584	543	Victoria_Juvenile
ENSMZEG00005006493	7.66942	1.29107	0.000837655	0.0440184	544	Victoria_Juvenile
ENSMZEG00005010009	5.49506	-1.66358	0.000838168	0.0440184	545	Victoria_Juvenile
ENSMZEG00005000932	9.54435	0.925688	0.000842222	0.0441503	546	Victoria_Juvenile
ENSMZEG00005020692	7.27378	-1.2369	0.000851835	0.0445726	547	Victoria_Juvenile
ENSMZEG00005003271	5.59308	1.61803	0.000854625	0.044637	548	Victoria_Juvenile
ENSMZEG00005017913	7.23763	1.19885	0.000859272	0.0446587	549	Victoria_Juvenile
ENSMZEG00005016338	6.90377	1.17836	0.000859349	0.0446587	550	Victoria_Juvenile
ENSMZEG00005004618	6.82983	2.19999	0.000861684	0.0446587	551	Victoria_Juvenile
ENSMZEG00005004077	3.1062	-3.34421	0.000862472	0.0446587	552	Victoria_Juvenile
ENSMZEG00005026881	-7.8522	-10.2	0.000863555	0.0446587	553	Victoria_Juvenile
ENSMZEG00005000865	9.6852	-1.01813	0.000865503	0.0446587	554	Victoria_Juvenile
ENSMZEG00005013403	8.065	-1.65254	0.000865963	0.0446587	555	Victoria_Juvenile
ENSMZEG00005014130	5.82584	-1.61398	0.000868971	0.0447332	556	Victoria_Juvenile
ENSMZEG00005023095	1.45628	4.29616	0.000870902	0.0447434	557	Victoria_Juvenile
ENSMZEG00005010946	8.57933	-0.956	0.000872295	0.0447434	558	Victoria_Juvenile
ENSMZEG00005007433	8.44464	-1.09161	0.000880865	0.0451022	559	Victoria_Juvenile
ENSMZEG00005016856	8.32391	-1.18142	0.000888401	0.0454042	560	Victoria_Juvenile
ENSMZEG00005017232	3.10205	3.06947	0.000889936	0.0454042	561	Victoria_Juvenile
ENSMZEG00005022833	6.50289	-1.90335	0.000900324	0.0458525	562	Victoria_Juvenile
ENSMZEG00005012050	7.08156	-1.37823	0.000901997	0.045856	563	Victoria_Juvenile
ENSMZEG00005025922	9.97239	2.15035	0.000905934	0.0459746	564	Victoria_Juvenile
ENSMZEG00005016428	9.44931	0.869454	0.000909333	0.0460654	565	Victoria_Juvenile
ENSMZEG00005017779	2.12421	-4.40555	0.000912464	0.0461319	566	Victoria_Juvenile
ENSMZEG00005020060	6.89027	1.90647	0.000913871	0.0461319	567	Victoria_Juvenile
ENSMZEG00005019946	5.59926	2.75992	0.000916432	0.0461798	568	Victoria_Juvenile
ENSMZEG00005019754	9.8367	2.43174	0.000922468	0.0464023	569	Victoria_Juvenile
ENSMZEG00005023500	10.8039	1.10234	0.00092528	0.0464571	570	Victoria_Juvenile
ENSMZEG00005019135	1.86694	4.59385	0.000928424	0.0464571	571	Victoria_Juvenile
ENSMZEG00005005047	7.95828	1.05421	0.000928427	0.0464571	572	Victoria_Juvenile
ENSMZEG00005026056	-7.8522	10.5552	0.000933319	0.0466203	573	Victoria_Juvenile
ENSMZEG00005014423	4.0957	3.24602	0.000937025	0.0467163	574	Victoria_Juvenile
ENSMZEG00005005384	9.66184	-0.967087	0.000938504	0.0467163	575	Victoria_Juvenile
ENSMZEG00005019827	4.2604	-2.68353	0.000944661	0.0469411	576	Victoria_Juvenile
ENSMZEG00005023958	6.08492	4.98833	0.000949298	0.0470898	577	Victoria_Juvenile
ENSMZEG00005024450	5.25176	1.85154	0.000951735	0.047129	578	Victoria_Juvenile
ENSMZEG00005017806	1.00681	4.9578	0.000961051	0.0475081	579	Victoria_Juvenile
ENSMZEG00005008076	7.17429	1.94055	0.000971225	0.0479283	580	Victoria_Juvenile
ENSMZEG00005017454	3.46475	-2.4311	0.000973449	0.0479554	581	Victoria_Juvenile
ENSMZEG00005006265	7.39151	-1.14633	0.000977905	0.047997	582	Victoria_Juvenile
ENSMZEG00005012556	2.30617	3.80855	0.000978331	0.047997	583	Victoria_Juvenile
ENSMZEG00005016519	10.314	1.03154	0.000979558	0.047997	584	Victoria_Juvenile
ENSMZEG00005018334	5.43612	1.99192	0.000982183	0.047997	585	Victoria_Juvenile
ENSMZEG00005009709	-7.8522	-10.4808	0.000982678	0.047997	586	Victoria_Juvenile
ENSMZEG00005009444	8.38087	-1.33375	0.000986419	0.0480373	587	Victoria_Juvenile
ENSMZEG00005025425	7.7323	-1.12012	0.000987054	0.0480373	588	Victoria_Juvenile
ENSMZEG00005020447	6.41077	2.02781	0.000988875	0.0480373	589	Victoria_Juvenile
ENSMZEG00005003333	7.32809	-1.25555	0.000990217	0.0480373	590	Victoria_Juvenile
ENSMZEG00005018986	4.93563	1.69921	0.000994845	0.048169	591	Victoria_Juvenile
ENSMZEG00005015038	5.81203	1.89445	0.000997266	0.048169	592	Victoria_Juvenile
ENSMZEG00005024284	4.48859	-1.87515	0.000998766	0.048169	593	Victoria_Juvenile
ENSMZEG00005015778	5.01801	3.23595	0.000999663	0.048169	594	Victoria_Juvenile
ENSMZEG00005023834	2.06894	-3.55802	0.00100318	0.0482179	595	Victoria_Juvenile
ENSMZEG00005001380	5.31584	-1.61508	0.00100405	0.0482179	596	Victoria_Juvenile
ENSMZEG00005023944	4.37201	-3.09605	0.0010142	0.0486238	597	Victoria_Juvenile
ENSMZEG00005006621	12.3313	-1.08349	0.00102093	0.0488646	598	Victoria_Juvenile
ENSMZEG00005021128	8.26413	1.24925	0.00103077	0.0492533	599	Victoria_Juvenile
ENSMZEG00005019628	4.47211	-2.05683	0.00103942	0.0495422	600	Victoria_Juvenile
ENSMZEG00005004392	-0.695301	7.9695	0.00104028	0.0495422	601	Victoria_Juvenile
ENSMZEG00005022168	3.82802	-2.14333	0.00105066	0.0499534	602	Victoria_Juvenile
ENSMZEG00005004397	6.83132	-12.826	6.3639e-13	8.85546e-09	1	Victoria_Adult
ENSMZEG00005022233	5.61162	-12.9951	8.64163e-13	8.85546e-09	2	Victoria_Adult
ENSMZEG00005015994	4.23745	-12.074	1.21684e-12	8.85546e-09	3	Victoria_Adult
ENSMZEG00005027586	5.19096	11.3519	1.23757e-12	8.85546e-09	4	Victoria_Adult
ENSMZEG00005023958	6.91048	5.8931	7.86292e-12	4.23137e-08	5	Victoria_Adult
ENSMZEG00005020277	5.79179	-9.17068	8.87018e-12	4.23137e-08	6	Victoria_Adult
ENSMZEG00005023960	4.54784	11.2905	1.21793e-11	4.97994e-08	7	Victoria_Adult
ENSMZEG00005005524	5.47924	9.63952	2.75116e-11	9.84298e-08	8	Victoria_Adult
ENSMZEG00005024195	7.20638	7.5476	3.30844e-11	1.05216e-07	9	Victoria_Adult
ENSMZEG00005002258	7.9604	-5.50474	5.11331e-11	1.33723e-07	10	Victoria_Adult
ENSMZEG00005025959	6.82276	-7.60115	5.3174e-11	1.33723e-07	11	Victoria_Adult
ENSMZEG00005026507	8.65436	5.60089	5.60643e-11	1.33723e-07	12	Victoria_Adult
ENSMZEG00005026067	4.82891	6.16198	6.40661e-11	1.35118e-07	13	Victoria_Adult
ENSMZEG00005014030	6.1503	-5.49834	6.60909e-11	1.35118e-07	14	Victoria_Adult
ENSMZEG00005027513	5.51056	8.78006	8.64135e-11	1.61916e-07	15	Victoria_Adult
ENSMZEG00005020282	5.51475	-10.2679	9.05126e-11	1.61916e-07	16	Victoria_Adult
ENSMZEG00005025734	9.46599	-5.79602	1.06063e-10	1.78573e-07	17	Victoria_Adult
ENSMZEG00005004281	7.15135	5.95297	1.16774e-10	1.85684e-07	18	Victoria_Adult
ENSMZEG00005001853	4.94704	-8.01922	1.2885e-10	1.94102e-07	19	Victoria_Adult
ENSMZEG00005021247	5.62834	-5.6742	2.26873e-10	3.24677e-07	20	Victoria_Adult
ENSMZEG00005015361	3.79748	-9.55055	2.77322e-10	3.49337e-07	21	Victoria_Adult
ENSMZEG00005007356	4.65017	11.9044	2.7834e-10	3.49337e-07	22	Victoria_Adult
ENSMZEG00005024059	2.37477	9.83072	2.80719e-10	3.49337e-07	23	Victoria_Adult
ENSMZEG00005024683	-9.31393	-17.3689	3.28692e-10	3.91992e-07	24	Victoria_Adult
ENSMZEG00005010906	8.62647	2.65393	3.89857e-10	4.29687e-07	25	Victoria_Adult
ENSMZEG00005022566	3.32597	-8.42379	3.95533e-10	4.29687e-07	26	Victoria_Adult
ENSMZEG00005013682	8.39094	-2.98553	4.05337e-10	4.29687e-07	27	Victoria_Adult
ENSMZEG00005027549	7.38279	8.04146	4.95578e-10	5.06587e-07	28	Victoria_Adult
ENSMZEG00005026805	4.23418	7.31807	6.55145e-10	6.34599e-07	29	Victoria_Adult
ENSMZEG00005007544	3.96163	-5.49805	6.65152e-10	6.34599e-07	30	Victoria_Adult
ENSMZEG00005014227	6.42945	-5.02267	7.69691e-10	7.10648e-07	31	Victoria_Adult
ENSMZEG00005007795	5.21557	-5.79601	8.20354e-10	7.33755e-07	32	Victoria_Adult
ENSMZEG00005000256	7.86697	3.48044	9.88027e-10	8.28004e-07	33	Victoria_Adult
ENSMZEG00005006143	3.55728	-10.7137	9.9726e-10	8.28004e-07	34	Victoria_Adult
ENSMZEG00005011744	7.37334	-4.82702	1.06378e-09	8.28004e-07	35	Victoria_Adult
ENSMZEG00005024951	2.65879	-9.27318	1.06559e-09	8.28004e-07	36	Victoria_Adult
ENSMZEG00005025853	8.78772	-3.54182	1.07037e-09	8.28004e-07	37	Victoria_Adult
ENSMZEG00005025243	5.68961	4.4845	1.13551e-09	8.55278e-07	38	Victoria_Adult
ENSMZEG00005008254	7.90466	2.79435	1.46425e-09	1.07461e-06	39	Victoria_Adult
ENSMZEG00005001368	7.18084	-6.56594	1.51638e-09	1.08504e-06	40	Victoria_Adult
ENSMZEG00005005031	4.34079	6.51705	1.70909e-09	1.17945e-06	41	Victoria_Adult
ENSMZEG00005014251	6.48552	3.7887	1.77127e-09	1.17945e-06	42	Victoria_Adult
ENSMZEG00005014899	9.89161	-3.88933	1.80064e-09	1.17945e-06	43	Victoria_Adult
ENSMZEG00005021488	6.96421	-3.95737	1.81314e-09	1.17945e-06	44	Victoria_Adult
ENSMZEG00005028093	7.12732	-3.28168	2.03347e-09	1.29338e-06	45	Victoria_Adult
ENSMZEG00005001049	4.02038	8.00982	2.21661e-09	1.37921e-06	46	Victoria_Adult
ENSMZEG00005010014	9.89259	-4.5835	2.35389e-09	1.41241e-06	47	Victoria_Adult
ENSMZEG00005025677	9.45143	-2.90511	2.3706e-09	1.41241e-06	48	Victoria_Adult
ENSMZEG00005013804	5.34164	-4.50342	2.41801e-09	1.41241e-06	49	Victoria_Adult
ENSMZEG00005020202	7.85318	-3.74728	2.60696e-09	1.49233e-06	50	Victoria_Adult
ENSMZEG00005007123	3.45253	-8.61242	2.68157e-09	1.50494e-06	51	Victoria_Adult
ENSMZEG00005015174	8.46741	-4.08785	2.89458e-09	1.59324e-06	52	Victoria_Adult
ENSMZEG00005013343	-9.31393	17.2078	3.06094e-09	1.63439e-06	53	Victoria_Adult
ENSMZEG00005001073	6.09094	4.67564	3.09145e-09	1.63439e-06	54	Victoria_Adult
ENSMZEG00005017841	4.76949	-5.55625	3.14064e-09	1.63439e-06	55	Victoria_Adult
ENSMZEG00005022458	4.81107	6.62537	3.39728e-09	1.73638e-06	56	Victoria_Adult
ENSMZEG00005016075	3.80662	-6.10655	3.66026e-09	1.80741e-06	57	Victoria_Adult
ENSMZEG00005004133	2.84896	-9.1767	3.66256e-09	1.80741e-06	58	Victoria_Adult
ENSMZEG00005021069	2.99027	7.56515	3.79936e-09	1.82066e-06	59	Victoria_Adult
ENSMZEG00005002162	6.24333	-5.19933	3.87934e-09	1.82066e-06	60	Victoria_Adult
ENSMZEG00005023961	7.52333	-4.26359	3.90068e-09	1.82066e-06	61	Victoria_Adult
ENSMZEG00005018305	6.62342	4.54491	3.9467e-09	1.82066e-06	62	Victoria_Adult
ENSMZEG00005026113	5.119	-8.60077	4.00745e-09	1.82066e-06	63	Victoria_Adult
ENSMZEG00005027823	5.20861	6.4519	4.11135e-09	1.83867e-06	64	Victoria_Adult
ENSMZEG00005004119	-9.31393	-16.2495	4.21197e-09	1.85469e-06	65	Victoria_Adult
ENSMZEG00005009084	3.89192	9.69509	4.57625e-09	1.98457e-06	66	Victoria_Adult
ENSMZEG00005024109	8.42622	-2.72806	4.89954e-09	2.09176e-06	67	Victoria_Adult
ENSMZEG00005006712	3.89206	-11.7397	4.9696e-09	2.09176e-06	68	Victoria_Adult
ENSMZEG00005024709	3.44226	-6.67423	5.0717e-09	2.1038e-06	69	Victoria_Adult
ENSMZEG00005021666	11.9992	3.53336	5.31436e-09	2.17297e-06	70	Victoria_Adult
ENSMZEG00005025269	8.77525	-3.93807	5.93162e-09	2.39119e-06	71	Victoria_Adult
ENSMZEG00005028235	9.47533	-3.28755	6.15787e-09	2.44793e-06	72	Victoria_Adult
ENSMZEG00005019728	5.71451	7.04945	6.59261e-09	2.55829e-06	73	Victoria_Adult
ENSMZEG00005022506	9.73265	3.11201	6.72471e-09	2.55829e-06	74	Victoria_Adult
ENSMZEG00005028210	4.22644	-7.31002	6.77016e-09	2.55829e-06	75	Victoria_Adult
ENSMZEG00005012531	5.85494	-4.59798	6.79303e-09	2.55829e-06	76	Victoria_Adult
ENSMZEG00005009362	3.67871	7.31773	6.93835e-09	2.57908e-06	77	Victoria_Adult
ENSMZEG00005027217	7.22826	3.7541	7.5504e-09	2.77061e-06	78	Victoria_Adult
ENSMZEG00005002409	11.2135	2.66291	8.08874e-09	2.93058e-06	79	Victoria_Adult
ENSMZEG00005013389	9.13433	3.4392	8.39182e-09	3.00238e-06	80	Victoria_Adult
ENSMZEG00005025961	4.89741	-5.9371	8.56225e-09	3.0148e-06	81	Victoria_Adult
ENSMZEG00005026162	7.07894	3.69441	8.63718e-09	3.0148e-06	82	Victoria_Adult
ENSMZEG00005014061	4.87916	-6.00684	9.04053e-09	3.1e-06	83	Victoria_Adult
ENSMZEG00005013211	3.73649	11.0209	9.09791e-09	3.1e-06	84	Victoria_Adult
ENSMZEG00005017041	10.9607	2.40034	9.83614e-09	3.31212e-06	85	Victoria_Adult
ENSMZEG00005022532	-9.31393	-15.0679	1.00828e-08	3.35571e-06	86	Victoria_Adult
ENSMZEG00005009997	9.50384	3.34498	1.12198e-08	3.6912e-06	87	Victoria_Adult
ENSMZEG00005022768	2.12892	8.45268	1.16684e-08	3.79513e-06	88	Victoria_Adult
ENSMZEG00005014413	2.55892	10.199	1.34304e-08	4.31915e-06	89	Victoria_Adult
ENSMZEG00005002625	3.63552	-8.9784	1.3669e-08	4.34706e-06	90	Victoria_Adult
ENSMZEG00005025802	9.60744	-3.07274	1.38919e-08	4.36939e-06	91	Victoria_Adult
ENSMZEG00005001984	6.87893	4.62153	1.43372e-08	4.46042e-06	92	Victoria_Adult
ENSMZEG00005014379	4.53285	-6.36755	1.47956e-08	4.55354e-06	93	Victoria_Adult
ENSMZEG00005028395	10.3407	2.60875	1.50293e-08	4.57626e-06	94	Victoria_Adult
ENSMZEG00005013875	9.23779	1.96246	1.53073e-08	4.61184e-06	95	Victoria_Adult
ENSMZEG00005020447	7.13117	3.45848	1.62117e-08	4.83344e-06	96	Victoria_Adult
ENSMZEG00005000203	7.82835	2.51833	1.77778e-08	5.23364e-06	97	Victoria_Adult
ENSMZEG00005002433	6.32597	3.82581	1.79197e-08	5.23364e-06	98	Victoria_Adult
ENSMZEG00005015272	8.00323	2.78317	1.82162e-08	5.26651e-06	99	Victoria_Adult
ENSMZEG00005026798	12.003	-1.75876	1.87087e-08	5.3548e-06	100	Victoria_Adult
ENSMZEG00005018236	7.31162	-3.86904	2.00743e-08	5.68879e-06	101	Victoria_Adult
ENSMZEG00005005882	11.5124	-1.69991	2.11234e-08	5.92738e-06	102	Victoria_Adult
ENSMZEG00005015750	5.46124	4.64984	2.13962e-08	5.94564e-06	103	Victoria_Adult
ENSMZEG00005024112	-9.31393	-14.3709	2.23362e-08	6.14717e-06	104	Victoria_Adult
ENSMZEG00005015953	4.63312	6.63878	2.4211e-08	6.5997e-06	105	Victoria_Adult
ENSMZEG00005028509	6.00224	-4.56784	2.52505e-08	6.8181e-06	106	Victoria_Adult
ENSMZEG00005017985	-9.31393	-14.7626	2.58327e-08	6.91013e-06	107	Victoria_Adult
ENSMZEG00005023509	4.53653	3.61975	2.78993e-08	7.33815e-06	108	Victoria_Adult
ENSMZEG00005004217	10.2206	-2.1209	2.79456e-08	7.33815e-06	109	Victoria_Adult
ENSMZEG00005011450	6.57212	-2.91928	2.93435e-08	7.63518e-06	110	Victoria_Adult
ENSMZEG00005008203	9.2249	-2.33417	3.5131e-08	9.05874e-06	111	Victoria_Adult
ENSMZEG00005025849	5.27432	-6.52685	3.56627e-08	9.11372e-06	112	Victoria_Adult
ENSMZEG00005003328	10.2283	3.31798	3.6354e-08	9.20818e-06	113	Victoria_Adult
ENSMZEG00005019123	-9.31393	16.5555	3.67067e-08	9.21595e-06	114	Victoria_Adult
ENSMZEG00005019377	-9.31393	-14.6403	4.01067e-08	9.90205e-06	115	Victoria_Adult
ENSMZEG00005027776	-9.31393	16.116	4.01313e-08	9.90205e-06	116	Victoria_Adult
ENSMZEG00005000681	3.144	7.09246	4.1083e-08	1.00502e-05	117	Victoria_Adult
ENSMZEG00005008359	8.70835	-2.0146	4.16253e-08	1.00966e-05	118	Victoria_Adult
ENSMZEG00005005623	2.25809	-8.11528	4.30416e-08	1.03524e-05	119	Victoria_Adult
ENSMZEG00005011678	7.7574	-3.81648	4.34443e-08	1.03622e-05	120	Victoria_Adult
ENSMZEG00005026900	8.67196	2.04831	4.75683e-08	1.12423e-05	121	Victoria_Adult
ENSMZEG00005025006	-9.31393	-14.2352	4.79199e-08	1.12423e-05	122	Victoria_Adult
ENSMZEG00005004090	-9.31393	-15.4956	4.88928e-08	1.13773e-05	123	Victoria_Adult
ENSMZEG00005011238	-9.31393	16.339	4.93765e-08	1.13972e-05	124	Victoria_Adult
ENSMZEG00005022151	9.03946	-2.477	4.99538e-08	1.14382e-05	125	Victoria_Adult
ENSMZEG00005006121	7.59066	-2.67741	5.07606e-08	1.15307e-05	126	Victoria_Adult
ENSMZEG00005027034	10.6003	-2.60755	5.12048e-08	1.154e-05	127	Victoria_Adult
ENSMZEG00005012907	7.58994	3.02081	5.52045e-08	1.23443e-05	128	Victoria_Adult
ENSMZEG00005006237	2.90979	-7.56791	5.57058e-08	1.23598e-05	129	Victoria_Adult
ENSMZEG00005003609	3.7663	8.3654	5.66868e-08	1.24807e-05	130	Victoria_Adult
ENSMZEG00005004976	12.4439	2.28707	5.96087e-08	1.30238e-05	131	Victoria_Adult
ENSMZEG00005025643	12.8174	-2.22604	6.13702e-08	1.33071e-05	132	Victoria_Adult
ENSMZEG00005025960	-9.31393	-13.9429	6.28116e-08	1.35173e-05	133	Victoria_Adult
ENSMZEG00005020206	11.8977	5.13018	6.55804e-08	1.40078e-05	134	Victoria_Adult
ENSMZEG00005021382	11.2384	3.53421	6.77684e-08	1.43679e-05	135	Victoria_Adult
ENSMZEG00005022455	2.547	6.73798	7.07872e-08	1.48976e-05	136	Victoria_Adult
ENSMZEG00005016536	3.36224	-5.31853	7.36613e-08	1.53129e-05	137	Victoria_Adult
ENSMZEG00005025238	-9.31393	15.5295	7.38306e-08	1.53129e-05	138	Victoria_Adult
ENSMZEG00005019182	12.8656	1.75371	7.46203e-08	1.53653e-05	139	Victoria_Adult
ENSMZEG00005001990	13.1825	2.41972	7.58354e-08	1.5504e-05	140	Victoria_Adult
ENSMZEG00005008016	-9.31393	-14.5104	7.71425e-08	1.56061e-05	141	Victoria_Adult
ENSMZEG00005013350	7.3801	2.47101	7.74254e-08	1.56061e-05	142	Victoria_Adult
ENSMZEG00005028091	7.07626	-2.30937	7.89476e-08	1.58017e-05	143	Victoria_Adult
ENSMZEG00005014714	9.37518	1.65082	8.15122e-08	1.62017e-05	144	Victoria_Adult
ENSMZEG00005004957	8.56981	2.22029	9.23324e-08	1.82258e-05	145	Victoria_Adult
ENSMZEG00005007807	3.36563	6.23972	9.82335e-08	1.92578e-05	146	Victoria_Adult
ENSMZEG00005024498	8.12364	-4.17096	1.00682e-07	1.96035e-05	147	Victoria_Adult
ENSMZEG00005024883	3.0115	4.75228	1.02671e-07	1.98558e-05	148	Victoria_Adult
ENSMZEG00005027282	10.3096	-2.1573	1.04933e-07	2.0157e-05	149	Victoria_Adult
ENSMZEG00005013674	4.86658	-3.49694	1.07745e-07	2.05592e-05	150	Victoria_Adult
ENSMZEG00005001851	12.0554	-2.16094	1.09439e-07	2.07441e-05	151	Victoria_Adult
ENSMZEG00005009709	1.99767	-7.95093	1.12137e-07	2.11157e-05	152	Victoria_Adult
ENSMZEG00005014068	-9.31393	-14.7213	1.1556e-07	2.16071e-05	153	Victoria_Adult
ENSMZEG00005018896	9.63085	-3.31208	1.16256e-07	2.16071e-05	154	Victoria_Adult
ENSMZEG00005003153	9.57758	-1.70195	1.18446e-07	2.1872e-05	155	Victoria_Adult
ENSMZEG00005021145	9.16949	2.85533	1.22675e-07	2.25076e-05	156	Victoria_Adult
ENSMZEG00005022797	-9.31393	16.3189	1.29468e-07	2.36028e-05	157	Victoria_Adult
ENSMZEG00005019423	11.4821	1.70704	1.33726e-07	2.42191e-05	158	Victoria_Adult
ENSMZEG00005017806	2.78768	6.36813	1.34541e-07	2.42191e-05	159	Victoria_Adult
ENSMZEG00005008645	9.05134	-2.58088	1.40297e-07	2.49888e-05	160	Victoria_Adult
ENSMZEG00005013689	-9.31393	16.713	1.41045e-07	2.49888e-05	161	Victoria_Adult
ENSMZEG00005027701	-9.31393	-13.8997	1.41613e-07	2.49888e-05	162	Victoria_Adult
ENSMZEG00005012909	5.94129	-3.68734	1.42309e-07	2.49888e-05	163	Victoria_Adult
ENSMZEG00005006740	8.46187	-2.22165	1.50151e-07	2.6205e-05	164	Victoria_Adult
ENSMZEG00005014128	8.34336	1.70511	1.52846e-07	2.65136e-05	165	Victoria_Adult
ENSMZEG00005005571	8.9331	-2.13662	1.5447e-07	2.6634e-05	166	Victoria_Adult
ENSMZEG00005013168	4.29726	4.41555	1.56431e-07	2.66519e-05	167	Victoria_Adult
ENSMZEG00005019606	7.14915	2.32337	1.56436e-07	2.66519e-05	168	Victoria_Adult
ENSMZEG00005015744	7.89177	-2.61991	1.58285e-07	2.68073e-05	169	Victoria_Adult
ENSMZEG00005003365	4.14612	-4.07752	1.63702e-07	2.74086e-05	170	Victoria_Adult
ENSMZEG00005000513	12.1588	2.49051	1.63751e-07	2.74086e-05	171	Victoria_Adult
ENSMZEG00005017900	8.2479	3.27549	1.66196e-07	2.76561e-05	172	Victoria_Adult
ENSMZEG00005016478	9.893	3.31611	1.67602e-07	2.77289e-05	173	Victoria_Adult
ENSMZEG00005004591	2.74337	7.58266	1.7593e-07	2.89395e-05	174	Victoria_Adult
ENSMZEG00005003028	11.8141	-2.09493	1.77398e-07	2.90142e-05	175	Victoria_Adult
ENSMZEG00005021681	10.3992	1.83197	1.83933e-07	2.99121e-05	176	Victoria_Adult
ENSMZEG00005002194	10.0651	-3.35214	1.91542e-07	3.0785e-05	177	Victoria_Adult
ENSMZEG00005015654	5.84608	-2.68594	1.92423e-07	3.0785e-05	178	Victoria_Adult
ENSMZEG00005021242	2.81346	5.90094	1.92527e-07	3.0785e-05	179	Victoria_Adult
ENSMZEG00005000616	4.51719	-5.30031	1.96471e-07	3.12411e-05	180	Victoria_Adult
ENSMZEG00005014390	10.2572	-1.74942	2.02098e-07	3.19583e-05	181	Victoria_Adult
ENSMZEG00005026961	10.248	1.27817	2.07109e-07	3.23354e-05	182	Victoria_Adult
ENSMZEG00005005753	14.1048	2.31544	2.07398e-07	3.23354e-05	183	Victoria_Adult
ENSMZEG00005018803	-9.31393	-14.4321	2.07872e-07	3.23354e-05	184	Victoria_Adult
ENSMZEG00005023572	6.72731	-2.3426	2.09208e-07	3.23674e-05	185	Victoria_Adult
ENSMZEG00005007147	7.59024	-2.91547	2.19693e-07	3.36626e-05	186	Victoria_Adult
ENSMZEG00005023949	-9.31393	-14.3703	2.19932e-07	3.36626e-05	187	Victoria_Adult
ENSMZEG00005009967	10.6561	1.63112	2.23094e-07	3.39649e-05	188	Victoria_Adult
ENSMZEG00005016494	10.436	-2.37595	2.25397e-07	3.4134e-05	189	Victoria_Adult
ENSMZEG00005022538	1.77542	7.09872	2.26749e-07	3.4158e-05	190	Victoria_Adult
ENSMZEG00005016205	4.85653	3.38461	2.31575e-07	3.47023e-05	191	Victoria_Adult
ENSMZEG00005007442	12.7181	1.44451	2.36831e-07	3.53051e-05	192	Victoria_Adult
ENSMZEG00005013961	5.01274	-4.62229	2.44955e-07	3.6327e-05	193	Victoria_Adult
ENSMZEG00005027205	2.40835	-5.46254	2.49344e-07	3.67872e-05	194	Victoria_Adult
ENSMZEG00005015337	1.76042	-7.47643	2.54455e-07	3.73199e-05	195	Victoria_Adult
ENSMZEG00005023434	8.94448	-1.44643	2.55562e-07	3.73199e-05	196	Victoria_Adult
ENSMZEG00005012579	8.94315	2.13687	2.70953e-07	3.92258e-05	197	Victoria_Adult
ENSMZEG00005007829	4.76979	3.097	2.71354e-07	3.92258e-05	198	Victoria_Adult
ENSMZEG00005017048	-9.31393	-13.9159	2.77783e-07	3.99534e-05	199	Victoria_Adult
ENSMZEG00005011145	7.84584	1.60629	2.8425e-07	4.0679e-05	200	Victoria_Adult
ENSMZEG00005008943	5.02023	-4.23126	2.9344e-07	4.17852e-05	201	Victoria_Adult
ENSMZEG00005011462	6.49367	-2.97567	2.98276e-07	4.22636e-05	202	Victoria_Adult
[truncated: 5,621 more rows]
